# Supplementary material for: Identifying microRNAs and Their Editing Sites in Macaca mulatta
Source: Cells. 2019 Jul 5;8(7):682. doi: 10.3390/cells8070682 (PMC6678584; doi:10.3390/cells8070682)
Supplement: Supplementary file 1 [file cells-08-00682-s001.zip › Supplementary-Tables-v4.xlsx]

## Sheet: TableS1
Table S1. The information of 12 sRNA-seq profiles from different tissues of Macaca mulatta generated in this study to identify conserved and novel miRNAs, and their editing sites.
Sample_Name	Total_Reads	Valid_Reads	Tissue	Accession number
Kidney1	25995508	25579064	kidney	GSM3532787
Kidney2	24627481	24196258	kidney	GSM3532788
LargeInt1	22495447	22118095	large intestine	GSM3532789
LargeInt2	23970194	23523798	large intestine	GSM3532790
Liver	25636143	24793024	liver	GSM3532791
Lung	23364546	22871409	lung	GSM3532792
Muscle1	24436129	23970068	muscle	GSM3532793
Muscle2	23138629	22949856	muscle	GSM3532794
OccLobe	23572689	23009849	occipital lobe	GSM3532795
SmallInt1	24769494	24438680	small intestine	GSM3532796
SmallInt2	23931225	23710183	small intestine	GSM3532797
SpinalCord	24394266	23906542	spinal cord	GSM3532798

## Sheet: TableS2
Table S2. The distributions of small RNAs reads in the 12 sRNA-seq profiles generated in this study in different types of molecules.
	Kidney1		Kidney2		LargeInt1		LargeInt2		Liver		Lung		Muscle1		Muscle2		OccLobe		SmallInt1		SmallInt2		SpinalCord
database	reads	uniq-seq	reads	uniq-seq	reads	uniq-seq	reads	uniq-seq	reads	uniq-seq	reads	uniq-seq	reads	uniq-seq	reads	uniq-seq	reads	uniq-seq	reads	uniq-seq	reads	uniq-seq	reads	uniq-seq
genome	18908756	126546	15036542	131913	12631335	116985	15605818	120794	15730429	210623	13189731	196810	15681996	181581	15060539	147232	15145561	259070	16650462	95118	15773118	86275	17294043	317458
cdna	17671108	56592	13526594	56698	11668862	42263	14491019	42260	9219214	105220	10895120	76165	13868375	88873	13485024	78327	13393615	103104	16039706	36311	15326218	27467	14474884	167004
ncrna	19588250	65564	15707423	62747	13875538	103150	17710970	119987	16813182	122746	14616161	87436	17010222	118332	16386740	83766	15427887	77278	18433694	46048	17373818	63803	16870475	85946
repeats	80119	7020	98128	6497	60781	8120	86888	11758	453955	12815	159969	8459	110882	10405	112101	7610	88719	6473	35982	4753	31482	4886	88331	6579
premiRBase21	18138416	5507	14078467	5268	11960562	5106	14769615	5198	9750319	5812	11786359	6682	14874721	5972	14662772	5855	13840729	7223	16475924	5351	15671413	5032	14768127	7888
repbase	950454	26842	1188646	26541	743875	24218	916181	27296	5608713	42127	1897184	35334	1257200	32694	1191327	28360	1156830	30839	400515	19077	297200	17962	1351222	31362
total	25579064	383071	24196258	410188	22118095	549104	23523798	599044	24793024	825750	22871409	557263	23970068	599484	22949856	459047	23009849	627466	24438680	278383	23710183	285593	23906542	714392

## Sheet: TableS3
Table S3. The conserved pre-miRNAs of Macaca mulatta identified in our study and reported in the miRBase (v22) and the Ensembl database (version Mmul_8.0.1).
The 992, 626 and 1951 pre-miRNAs that are predicted in this study, reported in the miRBase and Ensembl database respectively were combined based on their genomic positions.
From line 1531 to 2568, 1038 pre-miRNAs reported in Ensembl have no annotations of mature miRNAs which need further investivation to verify that they are real miRNAs.
predicted_in_this_study	mirbase22_reported	ensembl_reported	ensembl_id	uniq-miRNA-ID	chr	strand	chr_start	chr_end	precursor_seq	length	miRNA-5p	5p start	5p end	miRNA-5p-seq	miRNA-3p	3p start	3p end	miRNA-3p-seq
	yes	yes	ENSMMUT00000036830	mml-let-7a-1	CM002986.2	+	44322723	44322802	ugggaugagguaguagguuguauaguuuuagggucacacccaccacugggagauaacuauacaaucuacugucuuuccua	80	mml-let-7a-1-5p	44322728	44322749	ugagguaguagguuguauaguu	mml-let-7a-1-3p	44322779	44322800	cuauacaaucuacugucuuucc
yes	yes	yes	ENSMMUT00000038223	mml-let-7a-2	CM002988.2	-	115000985	115001056	aggcugagguaguagguuguauaguuuagaauuacaucaagggagauaacuguacagccuccuagcuuuccu	72	mml-let-7a-2-5p	115000989	115001010	ugagguaguagguuguauaguu	mml-let-7a-2-3p	115001034	115001055	cuguacagccuccuagcuuucc
	yes	yes	ENSMMUT00000036704	mml-let-7a-3	CM002992.3	+	88293991	88294064	gggugagguaguagguuguauaguuuggggcucugcccugcuaugggauaacuauacaaucuacugucuuuccu	74	mml-let-7a-3-5p	88293994	88294015	ugagguaguagguuguauaguu	mml-let-7a-3-3p	88294042	88294063	cuauacaaucuacugucuuucc
yes	yes	yes	ENSMMUT00000048991	mml-let-7b	CM002992.3	+	88294908	88294990	cggggugagguaguagguugugugguuucagggcagugauguugccccucagaagauaacuauacaaccuacugccuucccug	83	mml-let-7b-5p	88294913	88294934	ugagguaguagguugugugguu	mml-let-7b-3p	88294967	88294988	cuauacaaccuacugccuuccc
yes	yes	yes	ENSMMUT00000036799	mml-let-7c	CM002984.2	-	31070403	31070486	gcauccggguugagguaguagguuguaugguuuagaguuacacccugggaguuaacuguacaaccuucuagcuuuccuuggagc	84	mml-let-7c-5p	31070413	31070434	ugagguaguagguuguaugguu	mml-let-7c-3p	31070458	31070479	cuguacaaccuucuagcuuucc
	yes	yes	ENSMMUT00000036755	mml-let-7d	CM002986.2	+	44325586	44325672	ccuaggaagagguaguagguugcauaguuuuagggcagggauuuugcccacaaggagguaacuauacgaccugcugccuuucuuagg	87	mml-let-7d-5p	44325593	44325614	agagguaguagguugcauaguu	mml-let-7d-3p	NA	NA	NA
		yes	ENSMMUT00000058846	mml-let-7d-1	CM002994.2	-	28350048	28350133	aaguacagguaguagguugccuaguuugaggacagggauuuuauccacaaggagguaauuauaugaccugcugccaccuuucuuag	86	mml-let-7d-1-5p	28350052	28350073	acagguaguagguugccuaguu	mml-let-7d-1-3p	28350099	28350120	gagguaauuauaugaccugcug
		yes	ENSMMUT00000060280	mml-let-7d-2	CM002977.3	-	205347076	205347162	ccuaggaagaggcagcagguugcauaguucuagggaaggcacuuuucccacuuggggguaacuguaugcccugcugccugucuuagg	87	mml-let-7d-2-5p	205347083	205347104	agaggcagcagguugcauaguu	mml-let-7d-2-3p	205347133	205347154	guaacuguaugcccugcugccu
yes	yes	yes	ENSMMUT00000038159	mml-let-7e	CM002996.3	+	46928012	46928090	cccgggcugagguaggagguuguauaguugaggaggacacccaaggagaucacuauacggccuccuagcuuuccccagg	79	mml-let-7e-5p	46928019	46928040	ugagguaggagguuguauaguu	mml-let-7e-3p	46928064	46928085	cuauacggccuccuagcuuucc
yes	yes	yes	ENSMMUT00000036805	mml-let-7f-1	CM002986.2	+	44323112	44323198	ucagagugagguaguagauuguauaguugugggguagugauuuuacccuguucaggagauaacuauacaaucuauugccuucccuga	87	mml-let-7f-1-5p	44323118	44323139	ugagguaguagauuguauaguu	mml-let-7f-1-3p	44323174	44323195	cuauacaaucuauugccuuccc
	yes	yes	ENSMMUT00000036553	mml-let-7f-2	CM002997.3	-	52964085	52964167	ugugggaugagguaguagauuguauaguuuuagggucauaccccaucuuggagauaacuauacagucuacugucuuucccacg	83	mml-let-7f-2-5p	52964092	52964113	ugagguaguagauuguauaguu	mml-let-7f-2-3p	NA	NA	cuauacaaucuauugccuuccc
yes	yes	yes	ENSMMUT00000036762	mml-let-7g	CM002980.3	+	89955755	89955838	aggcugagguaguaguuuguacaguuugagggucuaugauaccacccgguacaggagauaacuguacaggccacugccuugcca	84	mml-let-7g-5p	89955759	89955780	ugagguaguaguuuguacaguu	mml-let-7g-3p	89955816	89955837	cuguacaggccacugccuugcc
yes	yes	yes	ENSMMUT00000036691	mml-let-7i	CM002989.3	+	61524606	61524690	cuggcugagguaguaguuugugcuguuggucggguugugacauugcccgcuguggagauaacugcgcaagcuacugccuugcuag	85	mml-let-7i-5p	61524611	61524632	ugagguaguaguuugugcuguu	mml-let-7i-3p	61524668	61524688	ugcgcaagcuacugccuugcu
yes	yes	yes	ENSMMUT00000036565	mml-mir-1-1	CM002992.3	-	1807717	1807793	gcuugggaaacauacuucuuuauaugcccauauggaccugcuaagcuauggaauguaaagaaguauguaucucaggc	77	mml-mir-1-1-5p	1807726	1807748	acauacuucuuuauaugcccaua	mml-mir-1-1-3p	1807765	1807786	uggaauguaaagaaguauguau
yes	yes	yes	ENSMMUT00000051545	mml-mir-1-2	CM002995.2	-	10284217	10284288	cagaguacauacuucuuuauguacccauaugaacauacaaggcuauggaauguaaagaaguauguauuuugg	72	mml-mir-1-2-5p	10284223	10284245	acauacuucuuuauguacccaua	mml-mir-1-2-3p	10284262	10284283	uggaauguaaagaaguauguau
yes	yes	yes	ENSMMUT00000036714	mml-mir-7-1	CM002986.2	-	100309013	100309122	uuggauguuggccuaguucuguguggaagacuagugauuuuguuguuuuuagauaacuaaauugacaacaaaucacagucugccauauggcacaggccaugccucuacag	110	mml-mir-7-1-5p	100309036	100309058	uggaagacuagugauuuuguugu	mml-mir-7-1-3p	NA	NA	NA
yes	yes	yes	ENSMMUT00000036716	mml-mir-7-2	CM002991.3	+	66600869	66600978	cuggauacagagugaaguggcuggccccgucuggaagacuagugauuuuguuguugucuuacugcgcucaacaacaaaucccagucugccgaauggugccagccauugca	110	mml-mir-7-2-5p	66600900	66600922	uggaagacuagugauuuuguugu	mml-mir-7-2-3p	NA	NA	NA
	yes	yes	ENSMMUT00000048913	mml-mir-7-3	CM002996.3	+	4909005	4909114	agauuagaguggcuauggucuagugcuguguggaagacuagugauuuuguuguucugaugugcuacgacaacaaaucacagccggccucauagcgcagacucccuucgac	110	mml-mir-7-3-5p	4909035	4909057	uggaagacuagugauuuuguugu	mml-mir-7-3-3p	NA	NA	NA
yes	yes	yes	ENSMMUT00000036738	mml-mir-9-1	CM002977.3	-	131037358	131037446	cgggguugguuguuaucuuugguuaucuagcuguaugagugguguggagucuucauaaagcuagauaaccgaaaguaaaaauaacccca	89	mml-mir-9-1-5p	131037373	131037395	ucuuugguuaucuagcuguauga	mml-mir-9-1-3p	131037412	131037434	auaaagcuagauaaccgaaagua
yes	yes	yes	ENSMMUT00000036786	mml-mir-9-2	CM002982.3	-	85611111	85611197	ggaagcgaguuguuaucuuugguuaucuagcuguaugaguguauuggucuucauaaagcuagauaaccgaaaguaaaaacuccuuca	87	mml-mir-9-2-5p	85611126	85611148	ucuuugguuaucuagcuguauga	mml-mir-9-2-3p	85611163	85611185	auaaagcuagauaaccgaaagua
yes	yes	yes	ENSMMUT00000048499	mml-mir-9-3	CM002991.3	+	67381821	67381910	ggaggcccguuucucucuuugguuaucuagcuguaugagugccacagagccgcucucaagcuagauaaccgaaaguagaaaugacucuca	90	mml-mir-9-3-5p	67381836	67381858	ucuuugguuaucuagcuguauga	mml-mir-9-3-3p	67381875	67381896	cucaagcuagauaaccgaaagu
yes				mml-miR-9c	CM002982.3	+	85611097	85611199	cuccccggcgaucuugaaggaguuuuuacuuucgguuaucuagcuuuaugaagaccaauacacucauacagcuagauaaccaaagauaacaacucgcuuccca	103	mml-miR-9c-5p	85611127	85611147	uucgguuaucuagcuuuauga	mml-miR-9c-3p	85611160	85611182	ucauacagcuagauaaccaaaga
yes				mml-miR-9d	CM002977.3	+	131037351	131037453	caguguaugggguuauuuuuacuuucgguuaucuagcuuuaugaagacuccacaccacucauacagcuagauaaccaaagauaacaaccaaccccgccuccug	103	mml-miR-9d-5p	131037374	131037394	uucgguuaucuagcuuuauga	mml-miR-9d-3p	131037409	131037431	ucauacagcuagauaaccaaaga
yes	yes	yes	ENSMMUT00000036626	mml-mir-10a	CM002994.2	+	41307365	41307473	gaucugucugucuucuguauauacccuguagauccgaauuuguguaaggaauuuuguggucacaaauucguaucuaggggaauauguaguugacauaaacacuccgcuc	109	mml-mir-10a-5p	41307386	41307408	uacccuguagauccgaauuugug	mml-mir-10a-3p	41307428	41307448	aaauucguaucuaggggaaua
yes	yes	yes	ENSMMUT00000036649	mml-mir-10b	CM002979.2	+	63173247	63173356	ccagagguuguaacguugucuauauauacccuguagaaccgaauuugugugguauccauauagucacagauucgauucuaggggaauauauggucgaugcaaaaacuuca	110	mml-mir-10b-5p	63173273	63173295	uacccuguagaaccgaauuugug	mml-mir-10b-3p	63173314	63173334	agauucgauucuaggggaaua
yes	yes	yes	ENSMMUT00000036774	mml-mir-15a	CM002990.2	-	29400210	29400292	ccuuggaguaaaguagcagcacauaaugguuuguggauuuugaaaaggugcaggccauauugugcugccucaaaaauacaagg	83	mml-mir-15a-5p	29400223	29400244	uagcagcacauaaugguuugug	mml-mir-15a-3p	29400259	29400281	gcaggccauauugugcugccuca
	yes	yes	ENSMMUT00000036803	mml-mir-15b	CM002980.3	-	134308684	134308781	uugaggccuuaaaguacuguagcagcacaucaugguuuacauacuacagucaagaugcgaaucauuauuugcugcucuagaaauuuaaggaaauucau	98	mml-mir-15b-5p	134308703	134308724	uagcagcacaucaugguuuaca	mml-mir-15b-3p	134308741	134308762	cgaaucauuauuugcugcucua
yes	yes	yes	ENSMMUT00000036679	mml-mir-16-1	CM002990.2	-	29400064	29400152	gucagcagugccuuagcagcacguaaauauuggcguuaagauucuaaaauuaucuccaguauuaacugugcugcugaaguaagguugac	89	mml-mir-16-1-5p	29400077	29400098	uagcagcacguaaauauuggcg	mml-mir-16-1-3p	29400119	29400141	ccaguauuaacugugcugcugaa
yes	yes	yes	ENSMMUT00000036621	mml-mir-16-2	CM002980.3	-	134308544	134308624	guuccacucuagcagcacguaaauauuggcguagugaaauauguauuaaacaccaauauuacugugcugcuucagugugac	81	mml-mir-16-2-5p	134308553	134308574	uagcagcacguaaauauuggcg	mml-mir-16-2-3p	134308596	134308617	ccaauauuacugugcugcuuca
yes	yes	yes	ENSMMUT00000036671	mml-mir-17	CM002990.2	+	73096107	73096190	gucagaauaaugucaaagugcuuacagugcagguagugauaugugcaucuacugcagugaaggcacuuguagcauuauggugac	84	mml-mir-17-5p	73096120	73096143	caaagugcuuacagugcagguagu	mml-mir-17-3p	73096157	73096176	acugcagugaaggcacuugu
	yes	yes	ENSMMUT00000036588	mml-mir-18a	CM002990.2	+	73096253	73096323	uguucuaaggugcaucuagugcagauagugaaguagauuagcaucuacugcccuaagugcuccuucuggca	71	mml-mir-18a-5p	73096258	73096279	uaaggugcaucuagugcagaua	mml-mir-18a-3p	73096299	73096322	acugcccuaagugcuccuucuggc
yes	yes			mml-mir-18b	CM002997.3	-	128132396	128132466	uguguuaaggugcaucuagugcaguuagugaagcagcuuagaaucuacugcccuaaaugccccuucuggca	71	mml-mir-18b-5p	128132401	128132423	uaaggugcaucuagugcaguuag	mml-mir-18b-3p	NA	NA	NA
yes	yes	yes	ENSMMUT00000036547	mml-mir-19a	CM002990.2	+	73096393	73096474	gcaguccucuguuaguuuugcauaguugcacuacaagaagaauguaguugugcaaaucuaugcaaaacugaugguggccugc	82	mml-mir-19a-5p	73096406	73096426	aguuuugcauaguugcacuac	mml-mir-19a-3p	73096441	73096463	ugugcaaaucuaugcaaaacuga
yes	yes	yes	ENSMMUT00000053382	mml-mir-19b-1	CM002990.2	+	73096694	73096780	cacuguucuaugguuaguuuugcagguuugcauccagcugugugauauucugcugugcaaauccaugcaaaacugacugugguagug	87	mml-mir-19b-1-5p	NA	NA	NA	mml-mir-19b-1-3p	73096747	73096769	ugugcaaauccaugcaaaacuga
	yes	yes	ENSMMUT00000038181	mml-mir-19b-2	CM002997.3	-	128132026	128132121	acauugcuacuuacaauuaguuuugcagguuugcauuucagcguauauauguauauguggcugugcaaauccaugcaaaacugauugugauaaugu	96	mml-mir-19b-2-5p	NA	NA	NA	mml-mir-19b-2-3p	128132087	128132109	ugugcaaauccaugcaaaacuga
yes	yes	yes	ENSMMUT00000036761	mml-mir-20a	CM002990.2	+	73096567	73096637	guagcacuaaagugcuuauagugcagguaguguuuaguuaucuacugcauuaugagcacuuaaaguacugc	71	mml-mir-20a-5p	73096574	73096595	uaaagugcuuauagugcaggua	mml-mir-20a-3p	73096610	73096632	acugcauuaugagcacuuaaagu
yes	yes	yes	ENSMMUT00000048782	mml-mir-20b	CM002997.3	-	128132164	128132232	aguaccaaagugcucauagugcagguaguuuuggcaugacucuacuguagugugggcacuuccaguacu	69	mml-mir-20b-5p	128132169	128132191	caaagugcucauagugcagguag	mml-mir-20b-3p	128132206	128132228	uacuguagugugggcacuuccag
	yes			mml-mir-20b-2	JSUE03164174.1	-	197	265	aguaccaaagugcucauagugcagguaguuuuggcaugacucuacuguagugugggcacuuccaguacu	69	mml-mir-20b-2-5p	202	224	caaagugcucauagugcagguag	mml-mir-20b-2-3p	239	261	uacuguagugugggcacuuccag
yes	yes	yes	ENSMMUT00000036790	mml-mir-21	CM002994.2	+	53341909	53341980	ugucggguagcuuaucagacugauguugacuguugaaucucauggcaacaccagucgaugggcugucugaca	72	mml-mir-21-5p	53341916	53341937	uagcuuaucagacugauguuga	mml-mir-21-3p	53341954	53341975	caacaccagucgaugggcuguc
	yes	yes	ENSMMUT00000069959	mml-mir-22	CM002994.2	-	1602982	1603066	ggcugagccgcaguaguucuucaguggcaagcuuuauguccugacccagcuaaagcugccaguugaagaacuguugcccucugcc	85	mml-mir-22-5p	NA	NA	NA	mml-mir-22-3p	1603034	1603055	aagcugccaguugaagaacugu
yes	yes	yes	ENSMMUT00000036573	mml-mir-23a	CM002996.3	-	13839158	13839230	ggccggcugggguuccuggggaugggauuugcuuccugucacaaaucacauugccagggauuuccaaccgacc	73	mml-mir-23a-5p	13839168	13839187	gguuccuggggaugggauuu	mml-mir-23a-3p	13839202	13839222	aucacauugccagggauuucc
yes	yes	yes	ENSMMUT00000036832	mml-mir-23b	CM002986.2	+	108904067	108904163	cucaggugcucuggcugcuuggguuccuggcaugcugauuugugacuuaagauuaaaaucacauugccagggauuaccacgcaaccacgaccuuggc	97	mml-mir-23b-5p	108904087	108904107	ggguuccuggcaugcugauuu	mml-mir-23b-3p	108904124	108904144	aucacauugccagggauuacc
		yes	ENSMMUT00000057100	mml-mir-23b-1	CM002997.3	-	19418110	19418208	gugacuuuccaagugucacacagugaguggcauaaucagaguacaauuugggucaugcccauacaucacauugccagugauuacccaaggaaaguggcg	99	mml-mir-23b-1-5p	19418117	19418137	uccaagugucacacagugagu	mml-mir-23b-1-3p	19418174	19418194	aucacauugccagugauuacc
	yes			mml-mir-24-1	CM002986.2	+	108904876	108904943	cuccggugccuacugagcugauaucaguucucauuuuacacacuggcucaguucagcaggaacaggag	68	mml-mir-24-1-5p	108904881	108904903	gugccuacugagcugauaucagu	mml-mir-24-1-3p	108904919	108904940	uggcucaguucagcaggaacag
	yes	yes	ENSMMUT00000038247	mml-mir-24-2	CM002996.3	-	13838860	13838932	cucugccucccgugccuacugagcugaaacacaguugguuugugcacacuggcucaguucagcaggaacagga	73	mml-mir-24-2-5p	NA	NA	gugccuacugagcugauaucagu	mml-mir-24-2-3p	13838909	13838930	uggcucaguucagcaggaacag
yes	yes	yes	ENSMMUT00000036801	mml-mir-25	CM002984.2	-	125614974	125615057	ggccaguguugagaggcggagacuugggcaauugcuggacgcugcccugggcauugcacuugucucggucugacagugccggcc	84	mml-mir-25-5p	NA	NA	NA	mml-mir-25-3p	125615025	125615046	cauugcacuugucucggucuga
yes	yes	yes	ENSMMUT00000036655	mml-mir-26a-1	CM002980.3	-	104778007	104778083	guggccucguucaaguaauccaggauaggcugugcaggucccaaugggccuauucuugguuacuugcacggggacgc	77	mml-mir-26a-1-5p	104778016	104778037	uucaaguaauccaggauaggcu	mml-mir-26a-1-3p	104778055	104778076	ccuauucuugguuacuugcacg
yes	yes	yes	ENSMMUT00000036606	mml-mir-26a-2	CM002989.3	-	56631054	56631137	ggcuguggcuggauucaaguaauccaggauaggcuguuuccaucugugaggccuauucuugauuacuuguuucuggaggcagcu	84	mml-mir-26a-2-5p	56631067	56631088	uucaaguaauccaggauaggcu	mml-mir-26a-2-3p	56631105	56631126	ccuauucuugauuacuuguuuc
yes	yes	yes	ENSMMUT00000036752	mml-mir-26b	CM002979.2	+	100509522	100509598	ccgggacccaguucaaguaauucaggauagguugugugcuguccagccuguucuccauuacuuggcucggggaccgg	77	mml-mir-26b-5p	100509533	100509553	uucaaguaauucaggauaggu	mml-mir-26b-3p	100509568	100509588	ccuguucuccauuacuuggcu
		yes	ENSMMUT00000049840	mml-miR-26b-1	CM002985.3	+	127150029	127150095	accucguggccuggucuccauuauuugagaugaguuacaucuuggaggugaggacgugccucguggu	67	mml-miR-26b-1-5p	127150038	127150058	ccuggucuccauuauuugaga	mml-miR-26b-1-3p	127150069	127150089	cuuggaggugaggacgugccu
yes	yes	yes	ENSMMUT00000036648	mml-mir-27a	CM002996.3	-	13839013	13839090	cugaggagcagggcuuagcugcuugugagcaggguccacaccaagucguguucacaguggcuaaguuccgccccccag	78	mml-mir-27a-5p	13839022	13839043	agggcuuagcugcuugugagca	mml-mir-27a-3p	13839063	13839084	uucacaguggcuaaguuccgcc
yes	yes	yes	ENSMMUT00000036586	mml-mir-27b	CM002986.2	+	108904304	108904400	accucucuaacaaggugcagagcuuagcugauuggugaacagugauugguuuccgcuuuguucacaguggcuaaguucugcaccugaagagaaggug	97	mml-mir-27b-5p	108904322	108904344	agagcuuagcugauuggugaaca	mml-mir-27b-3p	108904364	108904384	uucacaguggcuaaguucugc
yes	yes	yes	ENSMMUT00000036695	mml-mir-28	CM002980.3	-	190962046	190962131	gguccuugcccucaaggagcucacagucuauugaguuuccuuugugacuuucccacuagauugugagcuccuggagggcaggcacu	86	mml-mir-28-5p	190962059	190962080	aaggagcucacagucuauugag	mml-mir-28-3p	190962099	190962120	cacuagauugugagcuccugga
	yes	yes	ENSMMUT00000036618	mml-mir-29a	CM002984.2	-	157003023	157003086	augacugauuucuuuugguguucagagucaauauaauuuucuagcaccaucugaaaucgguuau	64	mml-mir-29a-5p	157003027	157003048	cugauuucuuuugguguucaga	mml-mir-29a-3p	157003063	157003084	cuagcaccaucugaaaucgguu
yes	yes	yes	ENSMMUT00000036829	mml-mir-29b-1	CM002984.2	-	157003735	157003815	cuucaggaagcugguuucauauggugguuuagauuuaaauagugauugucuagcaccauuugaaaucaguguucuuggggg	81	mml-mir-29b-1-5p	157003743	157003767	agcugguuucauauggugguuuaga	mml-mir-29b-1-3p	157003785	157003807	uagcaccauuugaaaucaguguu
yes	yes	yes	ENSMMUT00000036548	mml-mir-29b-2	CM002977.3	+	158779716	158779796	cuucuggaagcugguuucacaugguggcuuagauuuuuccaucuuuguaucuagcaccauuugaaaucaguguuuuaggag	81	mml-mir-29b-2-5p	158779724	158779748	agcugguuucacaugguggcuuaga	mml-mir-29b-2-3p	158779767	158779789	uagcaccauuugaaaucaguguu
	yes	yes	ENSMMUT00000036659	mml-mir-29c	CM002977.3	+	158780300	158780387	aucucuuacacaggcugaccgauuucuccugguguucagagucuguuuuugucuagcaccauuugaaaucgguuaugauguaggggga	88	mml-mir-29c-5p	158780318	158780338	ccgauuucuccugguguucag	mml-mir-29c-3p	158780353	158780374	uagcaccauuugaaaucgguua
yes	yes	yes	ENSMMUT00000036678	mml-mir-30a	CM002983.2	-	69466191	69466261	gcgacuguaaacauccucgacuggaagcugugaagccauagaugggcuuucagucggauguuugcagcugc	71	mml-mir-30a-5p	69466196	69466217	uguaaacauccucgacuggaag	mml-mir-30a-3p	69466237	69466258	cuuucagucggauguuugcagc
yes	yes	yes	ENSMMUT00000036824	mml-mir-30b	CM002985.3	-	134094376	134094463	accaaguuucaguucauguaaacauccuacacucagcuguaauacauggauuggcugggagguggauguuuacuucagcugacuugga	88	mml-mir-30b-5p	134094392	134094412	uguaaacauccuacacucagc	mml-mir-30b-3p	134094430	134094451	cugggagguggauguuuacuuc
yes	yes	yes	ENSMMUT00000036571	mml-mir-30c-1	CM002977.3	+	40062235	40062323	accaugcuguaguguguguaaacauccuacacucucagcugugagcucaagguggcugggagaggguuguuuacuccuucugccaugga	89	mml-mir-30c-1-5p	40062251	40062273	uguaaacauccuacacucucagc	mml-mir-30c-1-3p	40062291	40062311	ugggagaggguuguuuacucc
yes	yes	yes	ENSMMUT00000036740	mml-mir-30c-2	CM002983.2	-	69440027	69440098	agauacuguaaacauccuacacucucagcuguggaaaguaagaaagcugggagaaggcuguuuacucucucu	72	mml-mir-30c-2-5p	69440033	69440055	uguaaacauccuacacucucagc	mml-mir-30c-2-3p	69440074	69440094	ugggagaaggcuguuuacucu
yes	yes	yes	ENSMMUT00000036765	mml-mir-30d	CM002985.3	-	134099791	134099859	uuguuguaaacauccccgacuggaagcuguaagacacagcuaagcuuucagucagauguuugcugcuac	69	mml-mir-30d-5p	134099795	134099816	uguaaacauccccgacuggaag	mml-mir-30d-3p	134099836	134099856	uuucagucagauguuugcugc
yes	yes	yes	ENSMMUT00000048415	mml-mir-30e	CM002977.3	+	40059281	40059372	gggcagucuucgcuacuguaaacauccuugacuggaagcuguaagguguucagaggagcuuucagucggauguuuacagcggcaggcugcca	92	mml-mir-30e-5p	40059297	40059318	uguaaacauccuugacuggaag	mml-mir-30e-3p	40059340	40059360	uuucagucggauguuuacagc
yes	yes	yes	ENSMMUT00000036834	mml-mir-31	CM002986.2	+	62389947	62390017	ggagaggaggcaagaugcuggcauagcuguugaacugggaaccugcuaugccaacauauugccaucuuucc	71	mml-mir-31-5p	62389955	62389975	ggcaagaugcuggcauagcug	mml-mir-31-3p	62389991	62390012	gcuaugccaacauauugccauc
yes	yes	yes	ENSMMUT00000036825	mml-mir-32	CM002986.2	+	30522918	30522987	ggagauauugcacauuacuaaguugcauguugucacggccucaaugcaauuuagugugugugauauuuuc	70	mml-mir-32-5p	30522923	30522943	uauugcacauuacuaaguugc	mml-mir-32-3p	30522965	30522984	aauuuagugugugugauauu
	yes	yes	ENSMMUT00000058730	mml-mir-33a	CM002992.3	+	83990729	83990797	cugcggugcauuguaguugcauugcauguucuggugguacccaugcaauguuuccacagugcauuacag	69	mml-mir-33a-5p	83990734	83990752	gugcauuguaguugcauug	mml-mir-33a-3p	NA	NA	NA
yes	yes	yes	ENSMMUT00000048560	mml-mir-33b	CM002994.2	-	17953778	17953873	gcgggcggccccgcggugcauugcuguugcauugcacgugugugaggcgggugcagugccucggcagugcagcccggagccggccccuggcaccgc	96	mml-mir-33b-5p	17953793	17953812	gugcauugcuguugcauugc	mml-mir-33b-3p	17953833	17953852	gugccucggcagugcagccc
yes	yes	yes	ENSMMUT00000036600	mml-mir-34a	CM002977.3	-	8320927	8321036	ggccagcugugaguguuucuuuggcagugucuuagcugguuguugugagcaauaguaaggaagcaaucagcaaguauacugcccuagaagugcuacacauuguggggccu	110	mml-mir-34a-5p	8320948	8320969	uggcagugucuuagcugguugu	mml-mir-34a-3p	8320991	8321012	aaucagcaaguauacugcccua
	yes	yes	ENSMMUT00000036758	mml-mir-34b	CM002988.2	+	104382402	104382485	gugcucgguuuguaggcagugucauuagcugauuguacuguggugguuacaaucacuaacuccacugccaucaaaacaaggcac	84	mml-mir-34b-5p	NA	NA	NA	mml-mir-34b-3p	104382451	104382472	caaucacuaacuccacugccau
yes	yes	yes	ENSMMUT00000048976	mml-mir-34c	CM002988.2	+	104382905	104382981	agucuaguuaccaggcaguguaguuagcugauugcugauaguaccaaucacuaaccacacggccagguaaaaagauu	77	mml-mir-34c-5p	104382917	104382939	aggcaguguaguuagcugauugc	mml-mir-34c-3p	104382950	104382971	aaucacuaaccacacggccagg
	yes	yes	ENSMMUT00000068405	mml-mir-92a-1	CM002990.2	+	73096816	73096893	cuuucuacacagguugggaucgguugcaaugcuguguuucuguaugguauugcacuugucccggccuguugaguuugg	78	mml-mir-92a-1-5p	NA	NA	ggguggggauuuguugcauuacu	mml-mir-92a-1-3p	73096863	73096884	uauugcacuugucccggccugu
yes	yes	yes	ENSMMUT00000036826	mml-mir-92a-2	CM002997.3	-	128131893	128131967	ucaucccuggguggggauuuguugcauuacuuguguucuauauaaaguauugcacuugucccggccuguggaaga	75	mml-mir-92a-2-5p	128131901	128131923	ggguggggauuuguugcauuacu	mml-mir-92a-2-3p	128131940	128131961	uauugcacuugucccggccugu
yes	yes	yes	ENSMMUT00000036929	mml-mir-92b	CM002977.3	+	129891862	129891957	cgggccccgggcgggcgggagggacgggacgcggugcaguguuguucuuucccccgccaauauugcacucgucccggccuccggcccccccggccc	96	mml-mir-92b-5p	129891881	129891904	agggacgggacgcggugcaguguu	mml-mir-92b-3p	129891922	129891943	uauugcacucgucccggccucc
yes	yes	yes	ENSMMUT00000036724	mml-mir-93	CM002984.2	-	125615179	125615258	cugggggcuccaaagugcuguucgugcagguagugugauuaaccgaccuacugcugagcuagcacuucccgagcccccag	80	mml-mir-93-5p	125615190	125615211	aaagugcuguucgugcagguag	mml-mir-93-3p	125615228	125615249	acugcugagcuagcacuucccg
yes	yes	yes	ENSMMUT00000036751	mml-mir-95	CM002981.2	-	8278113	8278193	aacacagugggcacucaauaaaugucuguugaauugaaaugcguuacauucaacggguauuuauugagcacccacucugug	81	mml-mir-95-5p	8278127	8278147	ucaauaaaugucuguugaauu	mml-mir-95-3p	8278161	8278182	uucaacggguauuuauugagca
yes	yes	yes	ENSMMUT00000038182	mml-mir-96	CM002984.2	-	155860126	155860203	uggccgauuuuggcacuagcacauuuuugcuugugucucuccgcucugagcaaucaugugcagugccaauaugggaaa	78	mml-mir-96-5p	155860134	155860155	uuuggcacuagcacauuuuugc	mml-mir-96-3p	NA	NA	NA
yes	yes	yes	ENSMMUT00000036607	mml-mir-98	CM002997.3	-	52963138	52963217	gugagguaguaaguuguauuguugugggguagggauauuaggccccaauuagaagauaacuauacaacuuacuacuuucc	80	mml-mir-98-5p	52963139	52963160	ugagguaguaaguuguauuguu	mml-mir-98-3p	NA	NA	NA
yes	yes	yes	ENSMMUT00000036698	mml-mir-99a	CM002984.2	-	31071139	31071219	cccauuggcauaaacccguagauccgaucuuguggugaaguggaccgcacaagcucgcuucuaugggucugugucagugug	81	mml-mir-99a-5p	31071151	31071172	aacccguagauccgaucuugug	mml-mir-99a-3p	31071189	31071209	aagcucgcuucuaugggucug
yes	yes	yes	ENSMMUT00000036800	mml-mir-99b	CM002996.3	+	46927837	46927906	ggcacccacccguagaaccgaccuugcggggccuucgccgcacacaagcucgugucuguggguccguguc	70	mml-mir-99b-5p	46927843	46927864	cacccguagaaccgaccuugcg	mml-mir-99b-3p	46927882	46927902	aagcucgugucuguggguccg
	yes	yes	ENSMMUT00000036664	mml-mir-100	CM002988.2	-	115006675	115006754	ccuguugccacaaacccguagauccgaacuugugguauuaguccgcacaagcuugugucuauagguaugugucuuuuagg	80	mml-mir-100-5p	115006687	115006708	aacccguagauccgaacuugug	mml-mir-100-3p	115006723	115006743	aagcuugugucuauagguaug
yes	yes	yes	ENSMMUT00000036756	mml-mir-101-1	CM002977.3	-	64744969	64745043	ugcccuggcucaguuaucacagugcugaugcuguccauucuaaagguacaguacugugauaacugaaggauggca	75	mml-mir-101-1-5p	64744978	64745000	ucaguuaucacagugcugaugcu	mml-mir-101-1-3p	64745015	64745036	uacaguacugugauaacugaag
yes	yes	yes	ENSMMUT00000036651	mml-mir-101-2	CM002986.2	-	79649338	79649416	acuguccuuuuucgguuaucaugguaccgaugcuguauaucugaaagguacaguacugugauaacugaagaaugguggu	79	mml-mir-101-2-5p	79649349	79649371	ucgguuaucaugguaccgaugcu	mml-mir-101-2-3p	79649386	79649407	uacaguacugugauaacugaag
yes	yes	yes	ENSMMUT00000036642	mml-mir-103-1	CM002982.3	-	166809198	166809275	uacugcccucggcuucuuuacagugcugccuuguugcauauggaucaagcagcauuguacagggcuaugaaggcauug	78	mml-mir-103-1-5p	166809206	166809230	ucggcuucuuuacagugcugccuug	mml-mir-103-1-3p	166809245	166809267	agcagcauuguacagggcuauga
yes	yes	yes	ENSMMUT00000036712	mml-mir-103-2	CM002992.3	+	36786820	36786897	uugugcuuucagcuucuuuacagugcugccuuguagcauucaggucaagcagcauuguacagggcuaugaaagaacca	78	mml-mir-103-2-5p	NA	NA	NA	mml-mir-103-2-3p	36786867	36786889	agcagcauuguacagggcuauga
yes	yes	yes	ENSMMUT00000036771	mml-mir-105-1	CM002997.3	-	146009447	146009527	ugugcaucguggucaaaugcucagacuccugugguggcugcucaugcaccacggauguuugagcaugugcuacggugucua	81	mml-mir-105-1-5p	146009459	146009481	ucaaaugcucagacuccuguggu	mml-mir-105-1-3p	146009497	146009518	acggauguuugagcaugugcua
yes	yes	yes	ENSMMUT00000036757	mml-mir-105-2	CM002997.3	-	146011639	146011719	ugugcaucguggucaaaugcucagacuccugugguggcugcuuaugcaccacggauguuugagcaugugcuauggugucua	81	mml-mir-105-2-5p	146011651	146011673	ucaaaugcucagacuccuguggu	mml-mir-105-2-3p	146011689	146011710	acggauguuugagcaugugcua
yes	yes	yes	ENSMMUT00000036556	mml-mir-106a	CM002997.3	-	128132553	128132633	ccuuggccauguaaaagugcuuacagugcagguagcuuuuugagaucuacugcaaugcaagcacuucuuacauuaccaugg	81	mml-mir-106a-5p	128132565	128132588	aaaagugcuuacagugcagguagc	mml-mir-106a-3p	128132601	128132623	acugcaaugcaagcacuucuuac
yes	yes	yes	ENSMMUT00000036613	mml-mir-106b	CM002984.2	-	125615402	125615483	ccugcuggggcuaaagugcugacagugcagauagugguccucuccgugcuaccgcacuguggguacuugcugcuccagcagg	82	mml-mir-106b-5p	125615413	125615433	uaaagugcugacagugcagau	mml-mir-106b-3p	125615452	125615473	accgcacuguggguacuugcug
yes	yes	yes	ENSMMUT00000036749	mml-mir-107	CM002987.3	-	84746619	84746699	cucucugcuuucagcuucuuuacaguguugccuuguggcauggaguucaagcagcauuguacagggcuaucaaagcacaga	81	mml-mir-107-5p	84746631	84746653	agcuucuuuacaguguugccuug	mml-mir-107-3p	84746668	84746690	agcagcauuguacagggcuauca
yes	yes	yes	ENSMMUT00000036777	mml-mir-122a	CM002995.2	+	47923530	47923614	ccuuagcagagcuguggagugugacaaugguguuugugucuaaacuaucaaacgccauuaucacacuaaauagcuacuacuaggc	85	mml-mir-122a-5p	47923544	47923565	uggagugugacaaugguguuug	mml-mir-122a-3p	47923581	47923601	acgccauuaucacacuaaaua
yes	yes	yes	ENSMMUT00000036555	mml-mir-124a-1	CM002985.3	+	62428637	62428745	aucaagaucagaggcucugcccuccguguucacagcggaccuugauuuaaugucauacaauuaaggcacgcggugaaugccaagagcggagccuacggcugcacuugaa	109	mml-mir-124a-1-5p	62428664	62428682	guucacagcggaccuugau	mml-mir-124a-1-3p	62428697	62428718	uuaaggcacgcggugaaugcca
yes	yes	yes	ENSMMUT00000036554	mml-mir-124a-2	CM002985.3	+	9901066	9901150	aggccucucucuccguguucacagcggaccuugauuuaaauguccauacaauuaaggcacgcggugaaugccaagaauggggcug	85	mml-mir-124a-2-5p	9901082	9901100	guucacagcggaccuugau	mml-mir-124a-2-3p	9901117	9901138	uuaaggcacgcggugaaugcca
		yes	ENSMMUT00000077019	mml-miR-124a-3	CM002992.3	-	1130227	1130313	ugagggccccucugcguguucacagcggaccuugauuuaaugucuauacaauuaaggcacgcggugaaugccaagagaggcgccucc	87	mml-miR-124a-3-5p	NA	NA	NA	mml-miR-124a-3-3p	1130278	1130299	uuaaggcacgcggugaaugcca
	yes	yes	ENSMMUT00000048766	mml-mir-125a	CM002996.3	+	46928481	46928566	ugccagucucugggucccugagacccuuuaaccugugaggacauccagggucacaggugagguucuugggagccuggcgucuggcc	86	mml-mir-125a-5p	46928533	46928554	acaggugagguucuugggagcc	mml-mir-125a-3p	46928495	46928518	ucccugagacccuuuaaccuguga
	yes	yes	ENSMMUT00000036647	mml-mir-125b-1	CM002988.2	-	114954035	114954122	ugcgcuccucucagucccugagacccuaacuugugauguuuaccguuuaaauccacggguuaggcucuugggagcugcgagucgugcu	88	mml-mir-125b-1-5p	114954089	114954110	acggguuaggcucuugggagcu	mml-mir-125b-1-3p	114954049	114954070	ucccugagacccuaacuuguga
	yes	yes	ENSMMUT00000038215	mml-mir-125b-2	CM002984.2	-	31021387	31021475	accagacuuuuccuagucccugagacccuaacuugugagguauuuuaguaacaucacaagucaggcucuugggaccuaggcggagggga	89	mml-mir-125b-2-5p	31021442	31021463	acaagucaggcucuugggaccu	mml-mir-125b-2-3p	31021403	31021424	ucccugagacccuaacuuguga
yes	yes	yes	ENSMMUT00000048383	mml-mir-126	CM002986.2	-	1641795	1641879	cgcuggugaugggacauuauuacuuuugguacgcgcugugacacuucaaacucguaccgugaguaauaaugcgcuguccacagca	85	mml-mir-126-5p	NA	NA	NA	mml-mir-126-3p	1641846	1641867	ucguaccgugaguaauaaugcg
yes	yes	yes	ENSMMUT00000048381	mml-mir-127	CM002991.3	+	163217177	163217273	ugugaucacugucuccagccugcugaagcucagagggcucugauucagaaagaucaucggauccgucugagcuuggcuggucggaagucuccucauc	97	mml-mir-127-5p	163217200	163217221	ugaagcucagagggcucugauu	mml-mir-127-3p	163217233	163217254	ucggauccgucugagcuuggcu
	yes	yes	ENSMMUT00000036833	mml-mir-128a	CM002979.2	+	21159071	21159152	ugagcuguuggauucggggccguagcacugucugagagguuuacauuucucacagugaaccggucucuuuuucagcugcuuc	82	mml-mir-128a-5p	21159085	21159107	cggggccguagcacugucugaga	mml-mir-128a-3p	21159120	21159141	ucacagugaaccggucucuuuu
	yes	yes	ENSMMUT00000036813	mml-mir-128b	CM002980.3	-	193821063	193821146	ugugcagugggaaggggggccgauacacuguacgagagugaguagcaggucucacagugaaccggucucuuucccuacuguguc	84	mml-mir-128b-5p	193821077	193821099	gggggccgauacacuguacgaga	mml-mir-128b-3p	193821114	193821134	ucacagugaaccggucucuuu
yes	yes	yes	ENSMMUT00000036641	mml-mir-129-1	CM002984.2	+	154453313	154453384	ggaucuuuuugcggucugggcuugcuguuccucucaacaguagucaggaagcccuuaccccaaaaaguaucu	72	mml-mir-129-1-5p	154453317	154453337	cuuuuugcggucugggcuugc	mml-mir-129-1-3p	154453361	154453382	aagcccuuaccccaaaaaguau
yes	yes	yes	ENSMMUT00000036657	mml-mir-129-2	CM002988.2	-	22449808	22449899	cugcccuucgugaaucuuuuugcggucugggcuugcuguacauaacucaauagccggaagcccuuaccccaaaaagcauucgcggagggcgc	92	mml-mir-129-2-5p	NA	NA	NA	mml-mir-129-2-3p	22449865	22449885	aagcccuuaccccaaaaagca
yes	yes	yes	ENSMMUT00000036729	mml-mir-130a	CM002988.2	-	15997927	15998007	ugcugcuggccagagcucuuuucacauugugcuacugucugcaccugucacuagcagugcaauguuaaaagggcauuggcc	81	mml-mir-130a-5p	15997941	15997962	gcucuuuucacauugugcuacu	mml-mir-130a-3p	15997981	15998000	cagugcaauguuaaaagggc
yes	yes	yes	ENSMMUT00000048672	mml-mir-130b	CM002992.3	+	63150659	63150740	ggccugcccgacacucuuucccuguugcacuacugugggccacugggaagcagugcaaugaugaaagggcaucggucagguc	82	mml-mir-130b-5p	63150671	63150692	acucuuucccuguugcacuacu	mml-mir-130b-3p	63150709	63150730	cagugcaaugaugaaagggcau
	yes	yes	ENSMMUT00000036794	mml-mir-132	CM002994.2	-	1943195	1943295	ccgcccccgcgucuccagggcaaccguggcuuucgauuguuacugugggaacuggagguaacagucuacagccauggucgccccgcagcacgcccacgcgc	101	mml-mir-132-5p	1943217	1943238	accguggcuuucgauuguuacu	mml-mir-132-3p	1943253	1943274	uaacagucuacagccauggucg
yes	yes	yes	ENSMMUT00000036634	mml-mir-133a	CM002995.2	-	10280933	10281020	acaaugcuuugcuagagcugguaaaauggaaccaaaucgccucuucaauggauuugguccccuucaaccagcuguagcuaugcauuga	88	mml-mir-133a-5p	NA	NA	NA	mml-mir-133a-3p	10280986	10281006	uugguccccuucaaccagcug
yes	yes	yes	ENSMMUT00000036733	mml-mir-133b	CM002983.2	+	53110676	53110794	ccucagaagaaagaugcccccugcucuggcuggucaaacggaaccaaguccgucuuccugagagguuugguccccuucaaccagcuacagcagggcuggcaauucccaguccuuggaga	119	mml-mir-133b-5p	53110706	53110725	uggucaaacggaaccaaguc	mml-mir-133b-3p	53110741	53110762	uuugguccccuucaaccagcua
yes	yes	yes	ENSMMUT00000036907	mml-mir-133c	CM002992.3	-	1797012	1797113	gggagccaaaugcuuugcuagagcugguaaaauggaaccaaaucgacuguccaauggauuugguccccuucaaccagcuguagcugugcauugauggcgccg	102	mml-mir-133c-5p	1797033	1797054	agcugguaaaauggaaccaaau	mml-mir-133c-3p	1797070	1797091	uuugguccccuucaaccagcug
yes	yes	yes	ENSMMUT00000036708	mml-mir-134	CM002991.3	+	163388701	163388773	cagggugugugacugguugaccagaggggcgugcacuguguucacccugugggccaccuagucaccaacccuc	73	mml-mir-134-5p	163388708	163388729	ugugacugguugaccagagggg	mml-mir-134-3p	163388746	163388768	ccugugggccaccuagucaccaa
yes	yes	yes	ENSMMUT00000036732	mml-mir-135a-1	CM002980.3	+	89922641	89922730	aggccucgcuguucucuauggcuuuuuauuccuaugugauucuacugcucacucauauagggauuggagccguggcgcacggcggggaca	90	mml-mir-135a-1-5p	89922657	89922679	uauggcuuuuuauuccuauguga	mml-mir-135a-1-3p	89922695	89922716	auauagggauuggagccguggc
yes	yes	yes	ENSMMUT00000036643	mml-mir-135a-2	CM002989.3	+	97414776	97414875	agauaaauucacucuagugcuuuauggcuuuuuauuccuaugugauaguaauaaagucucauguagggauggaagccaugaaauacauugugaaaaauca	100	mml-mir-135a-2-5p	97414798	97414820	uauggcuuuuuauuccuauguga	mml-mir-135a-2-3p	97414836	97414857	auguagggauggaagccaugaa
yes	yes	yes	ENSMMUT00000036576	mml-mir-135b	CM002977.3	+	161135771	161135867	cacucugcuguggccuauggcuuuucauuccuaugugauugcugucccaaacucauguagggcuaaaagccaugggcuacagugaggggcgagcucc	97	mml-mir-135b-5p	161135786	161135808	uauggcuuuucauuccuauguga	mml-mir-135b-3p	161135825	161135846	auguagggcuaaaagccauggg
	yes	yes	ENSMMUT00000036582	mml-mir-136	CM002991.3	+	163218898	163218989	uuggaugagcccucggaggacuccauuuguuuugaugauggauucuuaugcuccaucaucgucucaaaugagucuucagaggguucuaucau	92	mml-mir-136-5p	163218917	163218939	acuccauuuguuuugaugaugga	mml-mir-136-3p	NA	NA	NA
yes	yes	yes	ENSMMUT00000036572	mml-mir-137	CM002977.3	-	98853607	98853708	gguccucugacucucuucggugacggguauucuuggguggauaauacggauuacguuguuauugcuuaagaauacgcguagucgaggagaguaccagcggca	102	mml-mir-137-5p	98853629	98853652	acggguauucuuggguggauaaua	mml-mir-137-3p	98853665	98853687	uuauugcuuaagaauacgcguag
yes	yes	yes	ENSMMUT00000036656	mml-mir-138	CM002993.2	+	41029997	41030080	cguugcugcagcugguguugugaaucaggccgacgagcagcgcauccucuuacccggcuauuucacgacaccaggguugcauca	84	mml-mir-138-5p	41030006	41030028	agcugguguugugaaucaggccg	mml-mir-138-3p	41030055	41030074	uauuucacgacaccaggguu
		yes	ENSMMUT00000071392	mml-miR-138-1	CM002980.3	-	98551467	98551565	ccccagcauggugugguggggcagcugguguugugaaucaggccguugccaaucagagaacggcuacuucacaacaccagggccgcaccacacuacagg	99	mml-miR-138-1-5p	98551489	98551511	agcugguguugugaaucaggccg	mml-miR-138-1-3p	NA	NA	NA
yes	yes	yes	ENSMMUT00000036760	mml-mir-139	CM002988.2	-	64577060	64577127	guguauucuacagugcacgugucuccaguguggcucggaggcuggagacgcggcccuguuggaguaac	68	mml-mir-139-5p	64577066	64577087	ucuacagugcacgugucuccag	mml-mir-139-3p	64577103	64577124	ggagacgcggcccuguuggagu
yes	yes	yes	ENSMMUT00000036703	mml-mir-140	CM002993.2	+	54375562	54375661	ugugucucucucuguguccugccagugguuuuacccuaugguagguuacgucaugcuguucuaccacaggguagaaccacggacaggauaccggggcacc	100	mml-mir-140-5p	54375584	54375605	cagugguuuuacccuaugguag	mml-mir-140-3p	54375623	54375643	uaccacaggguagaaccacgg
yes	yes	yes	ENSMMUT00000036654	mml-mir-141	CM002989.3	+	7280874	7280968	uggccggcccuggguccaucuuccaguacaguguuggauggucuaauugugaagcuccuaacacugucugguaaagauggcccccgggucgguuu	95	mml-mir-141-5p	7280892	7280911	ucuuccaguacaguguugga	mml-mir-141-3p	7280933	7280953	aacacugucugguaaagaugg
yes	yes	yes	ENSMMUT00000036683	mml-mir-142	CM002994.2	+	31321566	31321652	gacagugcagucacccauaaaguagaaagcacuacuaacagcacuggaggguguaguguuuccuacuuuauggaugaguguacugug	87	mml-mir-142-5p	31321581	31321601	cauaaaguagaaagcacuacu	mml-mir-142-3p	31321617	31321639	uguaguguuuccuacuuuaugga
yes	yes	yes	ENSMMUT00000036802	mml-mir-143	CM002982.3	+	147550465	147550570	gcgcagcgccgugucucccagccugaggugcagugcugcaucucuggucaguugggagucugagaugaagcacuguagcucaggaagagagaaguuguucugcagc	106	mml-mir-143-5p	147550492	147550511	gugcagugcugcaucucugg	mml-mir-143-3p	147550525	147550545	ugagaugaagcacuguagcuc
yes	yes	yes	ENSMMUT00000038216	mml-mir-144	CM002994.2	-	22890605	22890690	uggggcccuggcugggauaucaucauauacuguaaguuugugaugagacacuacaguauagaugauguacuaguccgggcaccccc	86	mml-mir-144-5p	NA	NA	NA	mml-mir-144-3p	22890656	22890675	uacaguauagaugauguacu
yes	yes			mml-mir-144-2	JSUE03076546.1	+	578	663	uggggcccuggcugggauaucaucauauacuguaaguuugugaugagacacuacaguauagaugauguacuaguccgggcaccccc	86	mml-mir-144-2-5p	NA	NA	NA	mml-mir-144-2-3p	629	648	uacaguauagaugauguacu
yes	yes	yes	ENSMMUT00000036725	mml-mir-145	CM002982.3	+	147552171	147552258	caccuuguccucacgguccaguuuucccaggaaucccuuaaaugcuaagauggggauuccuggaaauacuguucuugaggucaugguu	88	mml-mir-145-5p	147552186	147552209	guccaguuuucccaggaaucccuu	mml-mir-145-3p	147552224	147552246	ggauuccuggaaauacuguucuu
yes	yes	yes	ENSMMUT00000048567	mml-mir-146a	CM002982.3	+	158689083	158689181	ccuauguguauccucagcuuugagaacugaauuccauggguugugucagugucagaccugugaaauucaguucuucagcugggauaucucugucgucgu	99	mml-mir-146a-5p	158689103	158689124	ugagaacugaauuccauggguu	mml-mir-146a-3p	158689139	158689160	ccugugaaauucaguucuucag
	yes	yes	ENSMMUT00000053780	mml-mir-146b	CM002987.3	+	98154421	98154494	ccuggcacugagaacugaauuccauaggcugugagcucuagcaaugcccuguggacucaguucuggugcccgg	73	mml-mir-146b-5p	98154429	98154450	ugagaacugaauuccauaggcu	mml-mir-146b-3p	98154465	98154486	ugcccuguggacucaguucugg
	yes			mml-mir-147a	CM002986.2	+	19039301	19039372	aaucuaaagaaaacauuucugcacacacaccagacuauugaagccaguguguggaaaugcuucugcuacauu	72	mml-mir-147a-5p	NA	NA	NA	mml-mir-147a-3p	19039347	19039368	guguguggaaaugcuucugcua
yes	yes	yes	ENSMMUT00000038158	mml-mir-147b	CM002991.3	+	21727348	21727427	uauaaaucuaguggaaacauuuccgcacaaacuagauucuggacaccagugugcggaagugcuucugcugcauuuuuagg	80	mml-mir-147b-5p	NA	NA	NA	mml-mir-147b-3p	21727396	21727416	gugugcggaagugcuucugcu
yes	yes	yes	ENSMMUT00000036665	mml-mir-148a	CM002984.2	+	82255603	82255670	gaggcaaaguucugagacacuccgacucugaguaugauagaagucagugcacuacagaacuuugucuc	68	mml-mir-148a-5p	82255608	82255629	aaaguucugagacacuccgacu	mml-mir-148a-3p	82255646	82255667	ucagugcacuacagaacuuugu
yes	yes	yes	ENSMMUT00000036753	mml-mir-148b	CM002989.3	+	53018095	53018193	caagcacgauuagcauuugaggugaaguucuguuauacacucaggcuguggcucucugaaagucagugcaucacagaacuuugucucgaaagcuuucua	99	mml-mir-148b-5p	53018118	53018141	gaaguucuguuauacacucaggcu	mml-mir-148b-3p	53018157	53018178	ucagugcaucacagaacuuugu
yes	yes	yes	ENSMMUT00000036674	mml-mir-149	CM002979.2	+	123188632	123188720	gccggcgcccaagcucuggcuccgugucuucacucccguguuuguccgaggagggagggagggacgggggcugugcuggggcagccgga	89	mml-mir-149-5p	123188646	123188668	ucuggcuccgugucuucacuccc	mml-mir-149-3p	123188686	123188707	gagggagggacgggggcugugc
yes	yes	yes	ENSMMUT00000036609	mml-mir-150	CM002996.3	-	44889216	44889299	cuccccauggcccugucucccaacccuuguaccagugcugggcucagacccugguacaggccugggggacagggaccuggggac	84	mml-mir-150-5p	44889231	44889252	ucucccaacccuuguaccagug	mml-mir-150-3p	44889266	44889286	cugguacaggccugggggaca
yes	yes	yes	ENSMMUT00000036773	mml-mir-151	CM002985.3	-	139957629	139957718	uuuccugcccucgaggagcucacagucuaguaugucucauccccuacuagacugaagcuccuugaggacagggauggucauacucaccuc	90	mml-mir-151-5p	139957639	139957659	ucgaggagcucacagucuagu	mml-mir-151-3p	139957675	139957695	cuagacugaagcuccuugagg
		yes	ENSMMUT00000077845	mml-mir-151-1	CM002993.2	+	32291046	32291116	ugugcuaggcgccgugggaaauacagagaacacaggcggucccugcccgcgaggagcucacagucuagaaa	71	mml-mir-151-1-5p	32291046	32291067	ugugcuaggcgccgugggaaau	mml-mir-151-1-3p	32291094	32291115	gcgaggagcucacagucuagaa
		yes	ENSMMUT00000064674	mml-miR-151-2	CM002982.3	-	130450637	130450722	uuuaauguugaagcacugugcugggcacuggagcuacccagaggaaugcacaacgcuccccucaaggagcucacagucuagcacac	86	mml-miR-151-2-5p	130450664	130450683	cuggagcuacccagaggaau	mml-miR-151-2-3p	130450698	130450717	ucaaggagcucacagucuag
		yes	ENSMMUT00000075980	mml-miR-151-3	CM002991.3	-	162431204	162431299	accucugauguaucaaucucucuucggggcucccgagacacagaaacagacaccugcccucgaggagcucacagucuagacaaacaaacccagggu	96	mml-miR-151-3-5p	NA	NA	NA	mml-miR-151-3-3p	162431263	162431282	ucgaggagcucacagucuag
	yes	yes	ENSMMUT00000036730	mml-mir-152	CM002994.2	+	41870677	41870763	ugucccccccggcccagguucugugauacacuccgacucgggcucuggagcagucagugcaugacagaacuugggcccggaaggacc	87	mml-mir-152-5p	41870692	41870714	agguucugugauacacuccgacu	mml-mir-152-3p	41870730	41870750	ucagugcaugacagaacuugg
yes	yes	yes	ENSMMUT00000036658	mml-mir-153-1	CM002979.2	-	101425493	101425582	cucacagcugccagugucauuuuugugaucugcagcuaguauucucacuccaguugcauagucacaaaagugaucauuggcagguguggc	90	mml-mir-153-1-5p	101425509	101425529	ucauuuuugugaucugcagcu	mml-mir-153-1-3p	101425546	101425565	uugcauagucacaaaaguga
yes	yes	yes	ENSMMUT00000036778	mml-mir-153-2	CM002984.2	-	184009317	184009403	agcgguggccagugucauuuuugugauguugcagcuaguaauaugagcccaguugcauagucacaaaagugaucauuggaaacugug	87	mml-mir-153-2-5p	184009331	184009352	ucauuuuugugauguugcagcu	mml-mir-153-2-3p	184009369	184009388	uugcauagucacaaaaguga
	yes	yes	ENSMMUT00000036810	mml-mir-154	CM002991.3	+	163393750	163393833	gagguacuugaagauagguuauccguguugccuucgcuuuauuugugacgaaucauacacgguugaccuauuuuucaguaccaa	84	mml-mir-154-5p	163393764	163393785	uagguuauccguguugccuucg	mml-mir-154-3p	163393800	163393821	aaucauacacgguugaccuauu
		yes	ENSMMUT00000074804	mml-miR-154-1	CM002994.2	+	31316856	31316902	aggcagguuaucugggcugccaucucccacuggcugcuugccugccu	47	mml-miR-154-1-5p	31316859	31316879	cagguuaucugggcugccauc	mml-miR-154-1-3p	NA	NA	NA
yes	yes	yes	ENSMMUT00000036770	mml-mir-155	CM002984.2	-	21414128	21414192	cuguuaaugcuaaucgugauagggguuuuuaccuccaacugacuccuacauguuagcauuaacag	65	mml-mir-155-5p	21414131	21414153	uuaaugcuaaucgugauaggggu	mml-mir-155-3p	NA	NA	NA
yes	yes	yes	ENSMMUT00000036616	mml-mir-181a-1	CM002977.3	+	167910267	167910376	ugaguuuugagguugcuucagugaacauucaacgcugucggugaguuuggaauuaaaaucaaaaccaucgaccguugauuguacccuauggcuaaccaucaucuacucca	110	mml-mir-181a-1-5p	167910290	167910312	aacauucaacgcugucggugagu	mml-mir-181a-1-3p	167910330	167910351	accaucgaccguugauuguacc
yes	yes	yes	ENSMMUT00000036577	mml-mir-181a-2	CM002986.2	-	14342713	14342822	agaagggcuaucaggccagccuucagaggacuccaaggaacauucaacgcugucggugaguuugggauuugaaaaaaccacugaccguugacuguaccucgggguccuua	110	mml-mir-181a-2-5p	14342751	14342773	aacauucaacgcugucggugagu	mml-mir-181a-2-3p	NA	NA	NA
yes	yes	yes	ENSMMUT00000036585	mml-mir-181b-1	CM002977.3	+	167910438	167910547	ccugugcagagauuauuuuuuaaaaggucacaaucaacauucauugcugucgguggguugaacuguguagacaagcucacugaacaaugaaugcaacuguggccccgcuu	110	mml-mir-181b-1-5p	167910473	167910496	aacauucauugcugucgguggguu	mml-mir-181b-1-3p	167910516	167910534	acugaacaaugaaugcaac
yes	yes	yes	ENSMMUT00000048836	mml-mir-181b-2	CM002986.2	-	14341488	14341576	cugauggcugcacucaacauucauugcugucgguggguuugagucugaaucaacucacugaucgaugaaugcaaacugcggaccaaaca	89	mml-mir-181b-2-5p	14341503	14341526	aacauucauugcugucgguggguu	mml-mir-181b-2-3p	14341544	14341562	acugaucgaugaaugcaaa
yes	yes	yes	ENSMMUT00000036702	mml-mir-181c	CM002996.3	+	13878531	13878640	cggagaauuugccaaggguuugggggaacauucaaccugucggugaguuugggcagcucaggcaaaccaucgaccguugaguggacccugagaccuggacuugccauccu	110	mml-mir-181c-5p	13878557	13878578	aacauucaaccugucggugagu	mml-mir-181c-3p	13878597	13878617	ccaucgaccguugaguggacc
yes	yes	yes	ENSMMUT00000036681	mml-mir-181d	CM002996.3	+	13878707	13878843	guccccuccccuaggccacagccaaggucacaaucaacauucauuguugucgguggguugugaggaccgaggccagacccaccgggggaugaaugucacuguggcugggccagacacggcuuaaggggaauggggac	137	mml-mir-181d-5p	13878742	13878764	aacauucauuguugucggugggu	mml-mir-181d-3p	NA	NA	NA
yes	yes	yes	ENSMMUT00000036700	mml-mir-182	CM002984.2	-	155854815	155854926	cacagcugcuugccucccccuguuuuuggcaaugguagaacucacacuggugagguaaugggauccggugguucuagacuugccaacuacggggcgagggcucagccggcac	112	mml-mir-182-5p	155854839	155854860	uuuggcaaugguagaacucaca	mml-mir-182-3p	NA	NA	NA
yes	yes	yes	ENSMMUT00000036557	mml-mir-183	CM002984.2	-	155860330	155860439	ccgcagaacgugacuccuguucuguguauggcacugguagaauucacugugaacagucucggucagugaauuaccgaagggccauaaacagagcagagacagauccacga	110	mml-mir-183-5p	155860356	155860378	uauggcacugguagaauucacug	mml-mir-183-3p	155860395	155860417	gugaauuaccgaagggccauaaa
yes	yes	yes	ENSMMUT00000036552	mml-mir-184	CM002991.3	+	56747751	56747834	ucagucacguccccuuaucacuuuuccagcccagcuuuaugacuguaaguguuggacggagaacugauaaggguaggugauuga	84	mml-mir-184-5p	NA	NA	NA	mml-mir-184-3p	56747803	56747824	uggacggagaacugauaagggu
yes	yes	yes	ENSMMUT00000036550	mml-mir-185	CM002992.3	+	61772288	61772369	agggcgcgagggauuggagagaaaggcaguuccugaugguccccuccucaggggcuggcuuuccucugguccuucccuccca	82	mml-mir-185-5p	61772302	61772323	uggagagaaaggcaguuccuga	mml-mir-185-3p	61772337	61772357	aggggcuggcuuuccucuggu
yes	yes	yes	ENSMMUT00000036715	mml-mir-186	CM002977.3	-	70944320	70944405	ugcuuguaacuuuccaaagaauucuccuuuugggcuuucugguuuuauuuuaagcccaaaggugaauuucuugggaaguuugagcu	86	mml-mir-186-5p	70944334	70944355	caaagaauucuccuuuugggcu	mml-mir-186-3p	70944374	70944394	cccaaaggugaauuucuuggg
yes	yes	yes	ENSMMUT00000036812	mml-mir-187	CM002995.2	-	24590827	24590935	ggucaggcucacuaugacacagugugagaccucgggcuacaacacaggacccgggugcugcucugaccccucgugucuuguguugcagccggagggacgcagguccgca	109	mml-mir-187-5p	24590861	24590881	ggcuacaacacaggacccggg	mml-mir-187-3p	24590897	24590918	ucgugucuuguguugcagccgg
yes	yes	yes	ENSMMUT00000036718	mml-mir-188	CM002997.3	+	50008578	50008663	ugcucccucucucacaucccuugcaugguggagggugagcuuuaugaaaaccccucccacaugcaggguuugcaggauggugagcc	86	mml-mir-188-5p	50008592	50008613	caucccuugcaugguggagggu	mml-mir-188-3p	50008632	50008651	ucccacaugcaggguuugca
yes	yes	yes	ENSMMUT00000038183	mml-mir-190a	CM002991.3	+	39416819	39416903	ugcaggccucugugugauauguuugauauauuagguuguuauuuaauccaacuauauaucaaacauauuccuacagugucuugcc	85	mml-mir-190a-5p	39416833	39416854	ugauauguuugauauauuaggu	mml-mir-190a-3p	39416870	39416890	cuauauaucaaacauauuccu
yes	yes	yes	ENSMMUT00000049175	mml-mir-190b	CM002977.3	-	128804072	128804150	ugcuucugugugauauguuugauauuggguuguuuaauuaggaaccaacuaaaugucaaacauauucuuacagcagcug	79	mml-mir-190b-5p	128804082	128804102	ugauauguuugauauuggguu	mml-mir-190b-3p	NA	NA	NA
yes	yes	yes	ENSMMUT00000038140	mml-mir-191	CM002980.3	+	93358708	93358799	cggcuggacagcgggcaacggaaucccaaaagcagcuguugucuccagagcauuccagcugcgcuuggauuucguccccugcucuccugccu	92	mml-mir-191-5p	93358723	93358745	caacggaaucccaaaagcagcug	mml-mir-191-3p	93358765	93358786	gcugcgcuuggauuucgucccc
yes	yes	yes	ENSMMUT00000036806	mml-mir-192	CM002988.2	+	9567205	9567314	gcugagaccgagugcacagggcucugaccuaugaauugacagccagugcucucgucuccccucuggcugccaauuccauaggucacagguauguucgccucaaugccagc	110	mml-mir-192-5p	9567228	9567248	cugaccuaugaauugacagcc	mml-mir-192-3p	9567272	9567292	ugccaauuccauaggucacag
	yes	yes	ENSMMUT00000048587	mml-mir-193a	CM002994.2	+	25651828	25651912	ggaugggagcugagggcugggucuuugcgggcgagaugagggugucggaucaacuggccuacaaagucccaguccucggcccccg	85	mml-mir-193a-5p	25651845	25651866	ugggucuuugcgggcgagauga	mml-mir-193a-3p	25651879	25651900	aacuggccuacaaagucccagu
yes	yes	yes	ENSMMUT00000036809	mml-mir-193b	CM002993.2	+	14430830	14430912	guggucucagaaucgggguuuugagggcgagaugaguuuauguuuuauccaacuggcccucaaagucccgcuuuuggggucau	83	mml-mir-193b-5p	14430843	14430864	cgggguuuugagggcgagauga	mml-mir-193b-3p	14430880	14430901	aacuggcccucaaagucccgcu
yes	yes	yes	ENSMMUT00000036754	mml-mir-194-1	CM002977.3	+	146240974	146241058	augguguuaucaaguguaacagcaacuccauguggacuguguaccaauuuccaguggagaugcuguuacuuuugaugguuaccaa	85	mml-mir-194-1-5p	146240988	146241009	uguaacagcaacuccaugugga	mml-mir-194-1-3p	NA	NA	NA
yes	yes	yes	ENSMMUT00000036820	mml-mir-194-2	CM002988.2	+	9567012	9567096	uggcucccgcccccuguaacagcaacuccauguggaaguguccacugauuccaguggggcugcuguuaucuggggcgagggccgg	85	mml-mir-194-2-5p	9567026	9567047	uguaacagcaacuccaugugga	mml-mir-194-2-3p	9567063	9567083	caguggggcugcuguuaucug
yes	yes	yes	ENSMMUT00000036739	mml-mir-195	CM002994.2	-	6978210	6978296	agcuucccuggcucuagcagcacagaaauauuggcacagggaagcaagucugccaauauuggcugugcugcuccaggcaggguggug	87	mml-mir-195-5p	6978224	6978244	uagcagcacagaaauauuggc	mml-mir-195-3p	6978262	6978284	ccaauauuggcugugcugcucca
yes	yes	yes	ENSMMUT00000038248	mml-mir-196a-1	CM002994.2	+	41255188	41255257	gugaauuagguaguuucauguuguugggccuggguuucugaacacaacaacauuaaaccacccgauucac	70	mml-mir-196a-1-5p	41255194	41255214	uagguaguuucauguuguugg	mml-mir-196a-1-3p	NA	NA	ggcaacaagaaacugccugag
yes	yes	yes	ENSMMUT00000036564	mml-mir-196a-2	CM002989.3	+	52660840	52660949	ugcucgcucagcugaucuguggcuuagguaguuucauguuguugggauugaguuuugaacucggcaacaagaaacugccugaguuacaucagucgguuuucgucgagggc	110	mml-mir-196a-2-5p	52660864	52660884	uagguaguuucauguuguugg	mml-mir-196a-2-3p	52660902	52660922	ggcaacaagaaacugccugag
yes	yes	yes	ENSMMUT00000048664	mml-mir-196b	CM002984.2	+	81000144	81000218	acuggucggugauuuagguaguuuccuguuguugggauccaccuuucucucgacagcacgacacugccuucauua	75	mml-mir-196b-5p	81000158	81000179	uagguaguuuccuguuguuggg	mml-mir-196b-3p	81000194	81000215	cgacagcacgacacugccuuca
yes	yes	yes	ENSMMUT00000036645	mml-mir-197	CM002977.3	+	110612906	110612980	ggcugugccggguagagagggcagugggagguaagagcucuucacccuucaccaccuucuccacccagcauggcc	75	mml-mir-197-5p	110612914	110612935	cggguagagagggcagugggag	mml-mir-197-3p	110612953	110612974	uucaccaccuucuccacccagc
	yes			mml-mir-197-2	JSUE03348151.1	-	573	647	ggcugugccggguagagagggcagugggagguaagagcucuucacccuucaccaccuucuccacccagcauggcc	75	mml-mir-197-2-5p	581	602	cggguagagagggcagugggag	mml-mir-197-2-3p	620	641	uucaccaccuucuccacccagc
	yes			mml-mir-198	CM002980.3	-	41579139	41579200	ucauugguccagaggggaaauagguuccugugauuuuuccuucuucucuguagaauaaauga	62	mml-mir-198-5p	41579144	41579162	gguccagaggggaaauagg	mml-mir-198-3p	NA	NA	NA
yes	yes	yes	ENSMMUT00000036804	mml-mir-199a-1	CM002977.3	+	195411983	195412092	aggaagcuucuggagauccugcuccgucgccccaguguucagacuaccuguucaggacaaugccguuguacaguagucugcacauugguuagacugggcaagggagagca	110	mml-mir-199a-1-5p	195412013	195412035	cccaguguucagacuaccuguuc	mml-mir-199a-1-3p	195412052	195412073	acaguagucugcacauugguua
yes	yes	yes	ENSMMUT00000036622	mml-mir-199a-2	CM002996.3	-	10858564	10858634	gccaacccaguguucagacuaccuguucaggaggcucucaacguguacaguagucugcacauugguuaggc	71	mml-mir-199a-2-5p	10858569	10858591	cccaguguucagacuaccuguuc	mml-mir-199a-2-3p	10858610	10858631	acaguagucugcacauugguua
		yes	ENSMMUT00000063162	mml-mir-199a-3	CM002986.2	+	10637117	10637226	ccagaggacaccuccacuccgucuacccaguguuuagacuaucuguucaggacucccaaauuguacaguagucugcacauugguuaggcugggcuggguuagacccucgg	110	mml-mir-199a-3-5p	10637144	10637165	caguguuuagacuaucuguuca	mml-mir-199a-3-3p	10637181	10637202	acaguagucugcacauugguua
yes	yes	yes	ENSMMUT00000048446	mml-mir-200a	CM002977.3	+	259981	260070	ccgggccccugugagcaucuuaccggacagugcuggauuucccagcuugacucuaacacugucugguaacgauguucaaaggugacccac	90	mml-mir-200a-5p	259996	260017	caucuuaccggacagugcugga	mml-mir-200a-3p	260034	260055	uaacacugucugguaacgaugu
yes	yes	yes	ENSMMUT00000036635	mml-mir-200c	CM002989.3	+	7280477	7280544	cccucgucuuacccagcaguguuugggugcgguugggagucucuaauacugccggguaaugauggagg	68	mml-mir-200c-5p	7280481	7280502	cgucuuacccagcaguguuugg	mml-mir-200c-3p	7280521	7280542	aauacugccggguaaugaugga
yes	yes	yes	ENSMMUT00000036831	mml-mir-203	CM002991.3	+	166495016	166495125	gugcuggggacucgcgcgcuggguccagugguucuuaacaguucaacaguucuguagcgcaauugugaaauguuuaggaccacuagacccggcgggcacggcgacagcga	110	mml-mir-203-5p	NA	NA	NA	mml-mir-203-3p	166495080	166495101	gugaaauguuuaggaccacuag
yes				mml-miR-203a	CM002991.3	-	166494995	166495144	cugcgcaugggacguuccgucgcugucgccgugcccgccgggucuagugguccuaaacauuucacaauugcgcuacagaacuguugaacuguuaagaaccacuggacccagcgcgcgaguccccagcaccgucgguucgccgagcugugg	150	mml-miR-203-5p	166495039	166495060	uagugguccuaaacauuucaca	mml-miR-203-3p	166495078	166495100	uugaacuguuaagaaccacugga
yes	yes	yes	ENSMMUT00000036766	mml-mir-204	CM002986.2	-	86992597	86992706	ggcuacagucuuucuucaugugacucguggacuucccuuugucauccuaugccugagaauauaugaaggaggcugggaaggcaaagggacguucaauugucaucacuggc	110	mml-mir-204-5p	86992629	86992650	uucccuuugucauccuaugccu	mml-mir-204-3p	86992667	86992688	ggcugggaaggcaaagggacgu
yes	yes	yes	ENSMMUT00000036624	mml-mir-205	CM002977.3	-	157131475	157131584	aaagauccucaggcaauccaugugcuucucuuguccuucauuccaccggagucugucucauacccaaccagauuucaguggagugaaguucaggaggcauggagcugacg	110	mml-mir-205-5p	157131508	157131529	uccuucauuccaccggagucug	mml-mir-205-3p	NA	NA	NA
yes	yes	yes	ENSMMUT00000036676	mml-mir-206	CM002983.2	+	53106130	53106215	ugcuucccgaggccacaugcuucuuuauauccccauauggauuacuuugcuauggaauguaaggaagugugugguuucggcaagug	86	mml-mir-206-5p	NA	NA	NA	mml-mir-206-3p	53106182	53106203	uggaauguaaggaagugugugg
yes	yes	yes	ENSMMUT00000036602	mml-mir-208a	CM002991.3	-	84741046	84741116	ugacaggcgagcuuuuggcccggguuauaccugaugcucacguauaagacgagcaaaaagcuuguugguca	71	mml-mir-208a-5p	84741054	84741075	gagcuuuuggcccggguuauac	mml-mir-208a-3p	84741089	84741110	auaagacgagcaaaaagcuugu
yes	yes	yes	ENSMMUT00000049251	mml-mir-208b	CM002991.3	-	84770499	84770575	ccucucagggaagcuuuuugcucgaauuauguuucugauccgaauauaagacgaacaaaagguuugucugagggcag	77	mml-mir-208b-5p	84770509	84770530	aagcuuuuugcucgaauuaugu	mml-mir-208b-3p	84770544	84770565	auaagacgaacaaaagguuugu
yes	yes	yes	ENSMMUT00000036644	mml-mir-210	CM002988.2	-	409390	409499	acccggcagucccuccaggcgcagggcagccccugcccaccgcacacugcgcugccccagacccacugugcgugugacagcggcugaucugugccugggcagcgcgaccc	110	mml-mir-210-5p	409417	409438	agccccugcccaccgcacacug	mml-mir-210-3p	409455	409476	cugugcgugugacagcggcuga
yes	yes	yes	ENSMMUT00000036675	mml-mir-211	CM002991.3	-	6944833	6944941	ucacuggccaugugacuugugggcuucccuuugucauccuuugccuagggcucugagcagggcagggacagcaaaggggugcucaguugucacuucccacagcacagag	109	mml-mir-211-5p	6944857	6944878	uucccuuugucauccuuugccu	mml-mir-211-3p	NA	NA	NA
yes	yes	yes	ENSMMUT00000048864	mml-mir-212	CM002994.2	-	1943555	1943664	cggggcaccccgcccggacagcgcgccggcaccuuggcucuagacugcuuacugcccgggccgcccucaguaacagucuccagucagggccaccgacgccuggccccgcc	110	mml-mir-212-5p	1943585	1943607	accuuggcucuagacugcuuacu	mml-mir-212-3p	1943625	1943645	uaacagucuccagucagggcc
	yes	yes	ENSMMUT00000036614	mml-mir-214	CM002977.3	+	195417710	195417819	ggccuggcuggacagaguugucaugugucugccugucuacacuugcugugcagaacauccgcucaccuguacagcaggcacagacaggcagucacaugacaacccagccu	110	mml-mir-214-5p	195417739	195417760	ugccugucuacacuugcugugc	mml-mir-214-3p	195417780	195417800	acagcaggcacagacaggcag
yes	yes	yes	ENSMMUT00000036598	mml-mir-215	CM002977.3	+	146241256	146241365	aucauuaagaaaugguauacaggaaaaugaccuaugaauugacagacacuauagcugaguuugucugucauuucuuuaggccaauauucuguaugacugugcuacuucaa	110	mml-mir-215-5p	146241282	146241302	augaccuaugaauugacagac	mml-mir-215-3p	146241319	146241341	ucugucauuucuuuaggccaaua
yes	yes	yes	ENSMMUT00000036793	mml-mir-216a	CM002978.2	-	56964578	56964687	gauggcugugaguuggcuuaaucucagcuggcaacugugagauguucauacaaucccucacaguggucucugggauuacgcuaaacagagcaauuuccuugcccucgcga	110	mml-mir-216a-5p	56964596	56964617	uaaucucagcuggcaacuguga	mml-mir-216a-3p	56964637	56964657	acaguggucucugggauuacg
	yes	yes	ENSMMUT00000038144	mml-mir-216b	CM002978.2	-	56976438	56976519	gcagacuggaaaaucucugcaggcaaaugugaugucacugaagaaaucacacacuuacccguagagauucuacagucugaca	82	mml-mir-216b-5p	56976448	56976469	aaaucucugcaggcaaauguga	mml-mir-216b-3p	NA	NA	NA
yes	yes	yes	ENSMMUT00000048581	mml-mir-217	CM002978.2	-	56958681	56958790	aauauaauuauuacauaguuuuugaugucgcagauucugcaucaggaacugauuggauaagaaucagucaccaucaguuccuaaugcauugccuucagcaucuaaacaag	110	mml-mir-217-5p	56958681	56958703	uucugcaucaggaacugauugga	mml-mir-217-3p	NA	NA	NA
yes	yes	yes	ENSMMUT00000036726	mml-mir-218-1	CM002981.2	+	19895038	19895142	aauguagcgagauuuucuguugugcuugaucuaaccaugugguugcgagguaugaguaaaacaugguuccgucaagcaccauggaacgucacgcagcuuucuaca	105	mml-mir-218-1-5p	19895057	19895077	uugugcuugaucuaaccaugu	mml-mir-218-1-3p	19895100	19895120	augguuccgucaagcaccaug
yes	yes	yes	ENSMMUT00000036629	mml-mir-218-2	CM002982.3	-	167032434	167032543	gaccagucgcugcggggcuuuccuuugugcuugaucuaaccaugugguggaacgauggaaacggaacaugguucugucaagcaccgcggaaagcaccgugcucuccugca	110	mml-mir-218-2-5p	167032458	167032478	uugugcuugaucuaaccaugu	mml-mir-218-2-3p	167032501	167032521	augguucugucaagcaccgcg
yes				mml-miR-219	CM002986.2	-	10477802	10477953	ccugcggcccccgccccuguugcgcccggagcucagccacagauguccagccacaauucucgguuggccgcagacucguacaagaauugcguuuggacaaucaguggcgaagccccugaguucagggcccuggucuccugcgggguuccgcu	152	mml-miR-219-5p	10477842	10477862	agauguccagccacaauucuc	mml-miR-219-3p	10477884	10477906	agaauugcguuuggacaaucagu
yes	yes	yes	ENSMMUT00000036610	mml-mir-219-1	CM002983.2	+	34051822	34051931	ccgccccgggccgcggcuccugauuguccaaacgcaauucucgagucuauggcucuggccgagaguugagucuggacgucccgagccgccgcccccaaaccucgaggggg	110	mml-mir-219-1-5p	34051842	34051862	ugauuguccaaacgcaauucu	mml-mir-219-1-3p	NA	NA	agaauuguggcuggacaucugu
yes	yes	yes	ENSMMUT00000036575	mml-mir-219-2	CM002986.2	+	10477833	10477929	acucaggggcuucgccacugauuguccaaacgcaauucuuguacgagucugcggccaaccgagaauuguggcuggacaucuguggcugagcuccggg	97	mml-mir-219-2-5p	10477851	10477871	ugauuguccaaacgcaauucu	mml-mir-219-2-3p	10477894	10477915	agaauuguggcuggacaucugu
yes	yes	yes	ENSMMUT00000036570	mml-mir-221	CM002997.3	-	45879461	45879570	ugaacauccaggucuggggcaugaaccuggcauacaauguagauuucuguguucguuaggcaacagcuacauugucugcuggguuucaggcuaccuggaaacauguucuc	110	mml-mir-221-5p	45879485	45879510	accuggcauacaauguagauuucugu	mml-mir-221-3p	45879525	45879547	agcuacauugucugcuggguuuc
yes	yes	yes	ENSMMUT00000036633	mml-mir-222	CM002997.3	-	45880323	45880432	gcugcuggaagguauagguacccucaauggcucaguagccaguguagauccugucuuucguaaucagcagcuacaucuggcuacugggucucugauggcaucuucuagcu	110	mml-mir-222-5p	45880355	45880373	caguagccaguguagaucc	mml-mir-222-3p	45880391	45880411	agcuacaucuggcuacugggu
yes	yes	yes	ENSMMUT00000036791	mml-mir-223	CM002997.3	+	60234773	60234882	cccggccuccugcagugccacgcuccguguauuugacaagcugaguuggacacuccgugugguagagugucaguuugucaaauaccccaagugcggcauaugcuuaccag	110	mml-mir-223-5p	NA	NA	NA	mml-mir-223-3p	60234840	60234860	ugucaguuugucaaauacccc
yes	yes	yes	ENSMMUT00000036578	mml-mir-224	CM002997.3	-	145593499	145593579	gggcuuucaagucacuagugguuccguuuaguagaugauugugcauuguuucaaaauggugcccuagugacuacaaagccc	81	mml-mir-224-5p	145593506	145593528	caagucacuagugguuccguuua	mml-mir-224-3p	145593554	145593574	auggugcccuagugacuacaa
yes	yes	yes	ENSMMUT00000036728	mml-mir-296	CM002992.3	+	5590756	5590835	aggacccuuccagagggcccccccucaauccuguugugccuaauucagaggguuggguggaggcucuccugaagggcucu	80	mml-mir-296-5p	5590769	5590789	agggcccccccucaauccugu	mml-mir-296-3p	5590803	5590824	gaggguuggguggaggcucucc
	yes			mml-mir-297	CM002981.2	-	109809533	109809600	uguauguaugugugcaugugcauauauguguguguauauauauauauguauuauguacucauauauca	68	mml-mir-297-5p	109809536	109809555	auguaugugugcaugugcau	mml-mir-297-3p	NA	NA	NA
		yes	ENSMMUT00000049360	mml-miR-297-1	CM002984.2	-	103671390	103671452	ugauuguaugugugcaugugcaucugagugugcaugcauacauauauauuauggauuaaauau	63	mml-miR-297-1-5p	103671393	103671412	uuguaugugugcaugugcau	mml-miR-297-1-3p	NA	NA	NA
yes	yes	yes	ENSMMUT00000049079	mml-mir-298	CM002992.3	+	5590153	5590240	ucaggucuucagcagaagccgggugguucucccagugguuuuccuugacugugaggaacuagccugcuguuuugcucaggaaugagcu	88	mml-mir-298-5p	5590163	5590186	agcagaagccgggugguucuccca	mml-mir-298-3p	NA	NA	NA
yes				mml-miR-299	CM002991.3	-	163359076	163359174	uggcugggcuggauaccaagaagcgguuuaccgucccacauacauauugaaaauguaugugggacgguaaaccauuucuucaaguaccgcacgauggug	99	mml-miR-299-5p	163359102	163359119	uuuaccgucccacauaca	mml-miR-299-3p	163359131	163359148	uaugugggacgguaaacc
	yes	yes	ENSMMUT00000048422	mml-mir-299	CM002991.3	+	163359095	163359157	aagaaaugguuuaccgucccacauacauuuucaauauguaugugggacgguaaaccgcuucuu	63	mml-mir-299-5p	163359101	163359122	ugguuuaccgucccacauacau	mml-mir-299-3p	163359133	163359154	uaugugggacgguaaaccgcuu
yes	yes	yes	ENSMMUT00000036562	mml-mir-301a	CM002994.2	+	30490677	30490762	acugcuaacgaaugcucugacuuuauugcacuacuguacuuuacagcuagcagugcaauaguauugucaaagcaucugaaagcagg	86	mml-mir-301a-5p	30490692	30490711	ucugacuuuauugcacuacu	mml-mir-301a-3p	30490727	30490749	cagugcaauaguauugucaaagc
yes	yes	yes	ENSMMUT00000048867	mml-mir-301b	CM002992.3	+	63150339	63150415	ccgcaggugcucugacgagguugcacuacugugcucugagaagcagugcaaugauauugucaaagcaucugggacca	77	mml-mir-301b-5p	NA	NA	NA	mml-mir-301b-3p	63150382	63150404	cagugcaaugauauugucaaagc
yes	yes	yes	ENSMMUT00000036743	mml-mir-302a	CM002981.2	-	111570580	111570648	ccaccacuuaaacguggauguacuugcuuugaaacuaaagaaguaagugcuuccauguuuuggugaugg	69	mml-mir-302a-5p	111570588	111570609	uaaacguggauguacuugcuuu	mml-mir-302a-3p	111570623	111570645	uaagugcuuccauguuuugguga
	yes	yes	ENSMMUT00000036759	mml-mir-302b	CM002981.2	-	111570892	111570967	gcucccuucaacuuuaacauggaagugcuuucugugacuuuaaaauaaguaagugcuuccauguuuuaguaggagu	76	mml-mir-302b-5p	NA	NA	NA	mml-mir-302b-3p	111570941	111570963	uaagugcuuccauguuuuaguag
	yes	yes	ENSMMUT00000036583	mml-mir-302c	CM002981.2	-	111570757	111570824	ccuuugcuuuaacauggggguaccugcugugugaaacaaaaguaagugcuuccauguuucaguggagg	68	mml-mir-302c-5p	NA	NA	NA	mml-mir-302c-3p	111570799	111570821	uaagugcuuccauguuucagugg
yes	yes	yes	ENSMMUT00000048843	mml-mir-302d	CM002981.2	-	111570414	111570481	ccucuacuuuaacauggaggcacuugcugugguaugacaaaaauaagugcuuccauguuugagugugg	68	mml-mir-302d-5p	NA	NA	NA	mml-mir-302d-3p	111570457	111570479	uaagugcuuccauguuugagugu
yes				mml-miR-320a	JSUE03248590.1	-	677	774	cuacuuccgaaaugucuugaaauguaucaauaagccuucucuucccaguucuucuuggagucaagaaaagcuggguugagaggcacagaaaagaaaaa	98	mml-miR-320a-5p	712	731	cuucucuucccaguucuucu	mml-miR-320a-3p	742	759	aaaagcuggguugagagg
yes	yes	yes	ENSMMUT00000036696	mml-mir-320a	CM002985.3	-	22140245	22140325	gcuucgcuccccuccgccuucucuucccgguucuucccggagucgggaaaagcuggguugagagggcgaaaaaggaugagg	81	mml-mir-320a-5p	NA	NA	NA	mml-mir-320a-3p	22140292	22140313	aaaagcuggguugagagggcga
		yes	ENSMMUT00000038148	mml-miR-320a-1	CM002985.3	+	45407636	45407695	ccuggccuucucuuccugguucuucccuaagucaggaaaagcuggguugagaggacgaaa	60	mml-miR-320a-1-5p	45407640	45407661	gccuucucuuccugguucuucc	mml-miR-320a-1-3p	45407672	45407693	aaaagcuggguugagaggacga
		yes	ENSMMUT00000038251	mml-miR-320a-2	CM002996.3	-	42046728	42046794	auggggcuuucucuucccaguucuuccuggagucggggaaaagcuggguugagagggugaacagaaa	67	mml-miR-320a-2-5p	NA	NA	NA	mml-miR-320a-2-3p	42046766	42046787	aaaagcuggguugagaggguga
yes				mml-miR-320b	CM002977.3	+	194002017	194002118	caagauaaaguaacuagauuggccuugccuucucuucccgguucuuccuggaguugggaaaagcuggguugagggggcauuuaaaaaauaauaaacauuaug	102	mml-miR-320b-5p	194002043	194002064	gccuucucuucccgguucuucc	mml-miR-320b-3p	194002075	194002094	aaaagcuggguugagggggc
yes	yes	yes	ENSMMUT00000049612	mml-mir-320b	CM002977.3	+	142175725	142175834	guuauuuuuagucuucuaccuaagaauucugucucuuaggcuuucucuucccaguuuucccaaaguugggaaaagcuggguugagagggcaaaaggaaaaagaaaaaaaa	110	mml-mir-320b-5p	NA	NA	NA	mml-mir-320b-3p	142175795	142175816	aaaagcuggguugagagggcaa
		yes	ENSMMUT00000038252	mml-miR-320b-1	CM002977.3	+	117745122	117745200	aauuaaucccucucuuucuaguucuuccuagagugaggaaaagcuggguugagagggcaaauaaauuaacuaauuaauu	79	mml-miR-320b-1-5p	NA	NA	NA	mml-miR-320b-1-3p	117745160	117745181	aaaagcuggguugagagggcaa
	yes	yes	ENSMMUT00000063191	mml-mir-320c	CM002995.2	+	12807569	12807677	aggagcacuggguauguacaaauaaaauggcauggcaggccuucucuuuccaguucuucccagaauugggaaaagcuggguugacaggguaaaaaaaagaaaaacaaau	109	mml-mir-320c-5p	NA	NA	NA	mml-mir-320c-3p	12807639	12807660	aaaagcuggguugacaggguaa
		yes	ENSMMUT00000049371	mml-mir-320c-1	CM002995.2	+	10130515	10130601	uuugcacuaaaaaugaggccuuaucuucccaguucuucccagagucaggaaaagcuggguugagaggguagaaaaaaaaugauguag	87	mml-mir-320c-1-5p	10130533	10130553	ccuuaucuucccaguucuucc	mml-mir-320c-1-3p	10130564	10130584	aaaagcuggguugagagggua
	yes	yes	ENSMMUT00000036727	mml-mir-323a	CM002991.3	+	163361034	163361119	uugguacuuggagagaggugguccguggcgcguucgcuuuauuuauggcgcacauuacacggucgaccucuuugcaguaucuaauc	86	mml-mir-323a-5p	163361049	163361070	aggugguccguggcgcguucgc	mml-mir-323a-3p	163361084	163361104	cacauuacacggucgaccucu
	yes	yes	ENSMMUT00000048880	mml-mir-323b	CM002991.3	+	163390241	163390297	agguuguccguggugaguucgcauuauuuaaugaugcccaauacacggucgaccucu	57	mml-mir-323b-5p	163390241	163390263	agguuguccguggugaguucgca	mml-mir-323b-3p	163390277	163390297	cccaauacacggucgaccucu
	yes	yes	ENSMMUT00000048384	mml-mir-324	CM002994.2	-	7199477	7199559	cugacuaugccuccccgcauccccuagggcauugguguaaagcuggagacccacugccccaggugcugcuggggguuguaguc	83	mml-mir-324-5p	7199492	7199514	cgcauccccuagggcauuggugu	mml-mir-324-3p	7199529	7199548	acugccccaggugcugcugg
	yes	yes	ENSMMUT00000036563	mml-mir-325	CM002997.3	-	70964680	70964777	augcagugcuugguuccuaguagguguccaguaaguguuuguuacauaauuuguuuauugaggaccuccuaucaaucaagcacugugcuaggcucugg	98	mml-mir-325-5p	70964695	70964717	ccuaguagguguccaguaagugu	mml-mir-325-3p	NA	NA	NA
	yes	yes	ENSMMUT00000068422	mml-mir-328	CM002993.2	-	51478395	51478453	gggggcaggaggggcucagggagaaagugcaugcagccccuggcccucucugcccuucc	59	mml-mir-328-5p	NA	NA	NA	mml-mir-328-3p	51478434	51478453	cuggcccucucugcccuucc
	yes	yes	ENSMMUT00000048540	mml-mir-329-1	CM002991.3	+	163362091	163362174	gugguaccugaagggagguuuucuggguuucuguuucuuuaaugaggaugaaacacaccugguuaaccucuuuuccaguaucaa	84	mml-mir-329-1-5p	163362105	163362127	gagguuuucuggguuucuguuuc	mml-mir-329-1-3p	163362142	163362163	aacacaccugguuaaccucuuu
	yes	yes	ENSMMUT00000048827	mml-mir-329-2	CM002991.3	+	163362410	163362489	gguaccugaagggagguuuucugggucucuguuucuuuacugaggaugaaacacaccugguuaaccucuuuuccaguauc	80	mml-mir-329-2-5p	163362422	163362443	gagguuuucugggucucuguuu	mml-mir-329-2-3p	163362459	163362480	aacacaccugguuaaccucuuu
yes	yes	yes	ENSMMUT00000036652	mml-mir-330	CM002996.3	-	40984405	40984498	cuuuggcgaucacugccucucugggccugugucuuaggcucugcaagaucaaccgagcaaagcacacggccugcagagaggcagcgcucugccc	94	mml-mir-330-5p	40984422	40984443	ucucugggccugugucuuaggc	mml-mir-330-3p	40984461	40984483	gcaaagcacacggccugcagaga
yes	yes	yes	ENSMMUT00000036689	mml-mir-331	CM002989.3	+	95122240	95122333	gaguuugguuuuguuuggguuuguucuagguauggucccagggaucccagaucaaaccaggccccugggccuauccuagaaccaaccuaaacuc	94	mml-mir-331-5p	95122265	95122286	cuagguauggucccagggaucc	mml-mir-331-3p	95122300	95122320	gccccugggccuauccuagaa
yes	yes	yes	ENSMMUT00000036719	mml-mir-335	CM002984.2	+	156614318	156614405	gagcgggggucaagagcaauaacgaaaaauguuugucauaaaccguuuuucauuauugcuccugaccuccucucauuugcuauauuca	88	mml-mir-335-5p	156614327	156614349	ucaagagcaauaacgaaaaaugu	mml-mir-335-3p	156614363	156614384	uuuuucauuauugcuccugacc
yes	yes	yes	ENSMMUT00000038180	mml-mir-337	CM002991.3	+	163207975	163208067	guagucaguaguuggggggugggaacggcuucauacaggaguugaugcacaguuauccagcuccuauaugaugccuuucuucauccccuucaa	93	mml-mir-337-5p	163207997	163208017	gaacggcuucauacaggaguu	mml-mir-337-3p	163208035	163208056	cuccuauaugaugccuuucuuc
yes	yes			mml-mir-338	CM002994.2	-	74986911	74986977	ucuccaacaauauccuggugcugagugaugacucaggugacuccagcaucagugauuuuguugaaga	67	mml-mir-338-5p	74986916	74986937	aacaauauccuggugcugagug	mml-mir-338-3p	74986952	74986973	uccagcaucagugauuuuguug
yes	yes	yes	ENSMMUT00000036797	mml-mir-339	CM002984.2	-	34941433	34941526	cggggcggccgcucucccuguccuccaggagcucacgugugccugccugugagcgccucgacgacagagccggcgcccgccccagugucugcgc	94	mml-mir-339-5p	34941447	34941469	ucccuguccuccaggagcucacg	mml-mir-339-3p	34941482	34941504	ugagcgccucgacgacagagccg
	yes	yes	ENSMMUT00000036705	mml-mir-340	CM002982.3	-	178677219	178677313	uuguaccuggugugauuauaaagcaaugagacugauugucauauguuguuugugggauccgucucaguuacuuuauagccauaccugguaucuua	95	mml-mir-340-5p	178677234	178677255	uuauaaagcaaugagacugauu	mml-mir-340-3p	178677276	178677298	uccgucucaguuacuuuauagcc
	yes	yes	ENSMMUT00000036807	mml-mir-342	CM002991.3	+	162431440	162431538	gaaacugggcucaaggugaggggugcuaucugugauugagggacaugguuaauggaauugucucacacagaaaucgcacccgucaccuuggccuacuua	99	mml-mir-342-5p	162431458	162431478	aggggugcuaucugugauuga	mml-mir-342-3p	162431500	162431522	ucucacacagaaaucgcacccgu
	yes	yes	ENSMMUT00000048815	mml-mir-345	CM002991.3	+	162634511	162634598	aaacccuaggucggcugacuccuagucaagggcucgugguggcuggugggcccugaacgaggguucuggaggccuggguuugaauauc	88	mml-mir-345-5p	162634524	162634545	gcugacuccuagucaagggcuc	mml-mir-345-3p	NA	NA	NA
yes	yes	yes	ENSMMUT00000036584	mml-mir-346	CM002987.3	+	46022041	46022126	gucugucugcccgcaugccugccucucuguugcucugaaggaggcaggggcugggccugcagcugccugggcagagcggcuccugc	86	mml-mir-346-5p	46022044	46022066	ugucugcccgcaugccugccucu	mml-mir-346-3p	NA	NA	NA
	yes	yes	ENSMMUT00000036721	mml-mir-361	CM002997.3	-	80001965	80002036	ggagcuuaucagaaucuccagggguacuuuauaauuucaaaaagucccccaggugugauucugauuugcuuc	72	mml-mir-361-5p	80001970	80001991	uuaucagaaucuccagggguac	mml-mir-361-3p	80002009	80002031	ucccccaggugugauucugauuu
yes	yes	yes	ENSMMUT00000049057	mml-mir-362	CM002997.3	+	50014025	50014089	cucgaauccuuggaaccuaggugugagugcuauuucagugcaacacaccuauucaaggauucaaa	65	mml-mir-362-5p	50014029	50014052	aauccuuggaaccuaggugugagu	mml-mir-362-3p	50014066	50014087	aacacaccuauucaaggauuca
yes	yes	yes	ENSMMUT00000036828	mml-mir-363	CM002997.3	-	128131733	128131807	uguugucggguggaucacgaugcaauuuugauuaguaucauaggagaaaaauugcacgguauccaucuguaaacc	75	mml-mir-363-5p	128131739	128131761	cggguggaucacgaugcaauuuu	mml-mir-363-3p	128131782	128131803	aauugcacgguauccaucugua
yes	yes	yes	ENSMMUT00000036589	mml-mir-365-1	CM002993.2	+	14436190	14436276	accgcagggaaaaugagggacuuuugggggcagauguguuuccauuccacuaucauaaugccccuaaaaauccuuauugcucuugca	87	mml-mir-365-1-5p	14436204	14436226	gagggacuuuugggggcagaugu	mml-mir-365-1-3p	14436245	14436266	uaaugccccuaaaaauccuuau
yes	yes	yes	ENSMMUT00000036640	mml-mir-365-2	CM002994.2	+	25667229	25667339	agaguguucaaggacagcaagaaaaaugagggacuuucaggggcagcuguguuuucugacucagucauaaugccccuaaaaauccuuauuguucuugcagugugcaucagg	111	mml-mir-365-2-5p	25667256	25667278	gagggacuuucaggggcagcugu	mml-mir-365-2-3p	25667296	25667317	uaaugccccuaaaaauccuuau
	yes	yes	ENSMMUT00000036685	mml-mir-367	CM002981.2	-	111570284	111570351	ccacuacuguugcuaauaugcaacucuguugaacacaaauuggaauugcacuuuagcaauggugaugg	68	mml-mir-367-5p	NA	NA	NA	mml-mir-367-3p	111570327	111570348	aauugcacuuuagcaaugguga
yes	yes	yes	ENSMMUT00000036713	mml-mir-369	CM002991.3	+	163399393	163399462	uugaagggagaucgaccguguuauauucgcuuuauugacuucgaauaauacaugguugaucuuuucucag	70	mml-mir-369-5p	163399401	163399422	agaucgaccguguuauauucgc	mml-mir-369-3p	163399436	163399456	aauaauacaugguugaucuuu
	yes	yes	ENSMMUT00000036569	mml-mir-370	CM002991.3	+	163245310	163245384	agacagagaagccaggucacgucucugcaguuacacagcucaugagugccugcugggguggaaccuggucugucu	75	mml-mir-370-5p	163245322	163245343	caggucacgucucugcaguuac	mml-mir-370-3p	163245357	163245378	gccugcugggguggaaccuggu
yes	yes	yes	ENSMMUT00000058869	mml-mir-371	CM002996.3	+	49142068	49142137	guggcacucaaacugugggggcacuuucugcucucuggugaaaaaagugccgccauguuuugaguguuac	70	mml-mir-371-1-5p	49142073	49142092	acucaaacugugggggcacu	mml-mir-371-1-3p	49142112	49142134	aagugccgccauguuuugagugu
yes	yes	yes	ENSMMUT00000048673	mml-mir-372	CM002996.3	+	49142277	49142343	gugauccucaaauguggagcacuauucugauguccaaguggaaagugcugcgacauuugagcgucac	67	mml-mir-372-5p	49142282	49142304	ccucaaauguggagcacuauucu	mml-mir-372-3p	49142318	49142340	aaagugcugcgacauuugagcgu
yes	yes	yes	ENSMMUT00000048930	mml-mir-373	CM002996.3	+	49142984	49143052	gggauacccaaaaugggagcacuuucccuuuugucugugcugggaagugcuucgauuuugggguguccc	69	mml-mir-373-5p	NA	NA	NA	mml-mir-373-3p	49143027	49143049	gaagugcuucgauuuuggggugu
yes				mml-miR-374	CM002997.3	+	68772050	68772151	cugguagacgacagccauagacacggacaaugauaauacaaccugcuaagugcuaggacacuuagcagguuguauuauauccauccgaguaggauuucuuca	102	mml-miR-374-5p	68772083	68772100	uaauacaaccugcuaagu	mml-miR-374-3p	68772111	68772133	uuagcagguuguauuauauccau
yes	yes	yes	ENSMMUT00000048691	mml-mir-374a	CM002997.3	-	68840608	68840679	uacaucggccauuauaauacaaccugauaaguguuacagcacuuaucagauuguauuguaauugucugugua	72	mml-mir-374a-5p	68840619	68840640	uuauaauacaaccugauaagug	mml-mir-374a-3p	68840649	68840670	cuuaucagauuguauuguaauu
yes	yes	yes	ENSMMUT00000048668	mml-mir-374b	CM002997.3	-	68772068	68772139	acucggauggauauaauacaaccugcuaaguguccuagcacuuagcagguuguauuaucauuguccgugucu	72	mml-mir-374b-5p	68772078	68772099	auauaauacaaccugcuaagug	mml-mir-374b-3p	68772109	68772129	uuagcagguuguauuaucauu
	yes	yes	ENSMMUT00000036697	mml-mir-375	CM002979.2	-	101126188	101126251	ccccgcgacgagccccucgcacaaaccggaccugagcguuuuguucguucggcucgcgugaggc	64	mml-mir-375-5p	NA	NA	NA	mml-mir-375-3p	101126227	101126248	uuuguucguucggcucgcguga
yes	yes			mml-mir-376a-1	CM002991.3	+	163374788	163374855	uaaaagguagauucuccuucuaugaguacauuauuuaugauuaaucauagaggaaaauccacguuuuc	68	mml-mir-376a-1-5p	163374794	163374816	guagauucuccuucuaugaguac	mml-mir-376a-1-3p	163374831	163374851	aucauagaggaaaauccacgu
yes	yes			mml-mir-376a-2	CM002991.3	+	163374075	163374154	gguauuuaaaagguagauuuuccuucuaugguuacguguuugaugguuaaucauagaggaaaauccacguuuucaguauc	80	mml-mir-376a-2-5p	163374087	163374107	guagauuuuccuucuaugguu	mml-mir-376a-2-3p	163374124	163374144	aucauagaggaaaauccacgu
	yes			mml-mir-376a-3	JSUE03276506.1	-	244	323	gguauuuaaaagguagauuuuccuucuaugguuacguguuugaugguuaaucauagaggaaaauccacguuuucaguauc	80	mml-mir-376a-3-5p	256	276	guagauuuuccuucuaugguu	mml-mir-376a-3-3p	293	313	aucauagaggaaaauccacgu
yes	yes			mml-mir-376b	CM002991.3	+	163374442	163374541	caguccuucuuugguauuuaaaacguggauauuccuucuauguuuacgugauuccugguuaaucauagaggaaaauccauguuuucaguaucaaaugcug	100	mml-mir-376b-5p	163374465	163374487	cguggauauuccuucuauguuua	mml-mir-376b-3p	163374503	163374524	aucauagaggaaaauccauguu
yes	yes			mml-mir-376c	CM002991.3	+	163373697	163373762	aaaagguggauauuccuucuauguuuauguuauuuaugguuaaacauagaggaaauuccacguuuu	66	mml-mir-376c-5p	163373702	163373723	guggauauuccuucuauguuua	mml-mir-376c-3p	163373739	163373759	aacauagaggaaauuccacgu
yes	yes	yes	ENSMMUT00000036795	mml-mir-377	CM002991.3	+	163395850	163395918	uugagcagagguugcccuuggugaauucgcuuuauuuauguugaaucacacaaaggcaacuuuuguuug	69	mml-mir-377-5p	163395856	163395877	agagguugcccuuggugaauuc	mml-mir-377-3p	163395894	163395915	aucacacaaaggcaacuuuugu
yes		yes	ENSMMUT00000058757	mml-miR-378a	CM002985.3	-	92447776	92447875	ugaaugguuacaaggaaagaacacuggacuuggagucagaagaccuucauccaagucauucccugcucuaagucccauuucugcuccaugagauuguuuc	100	mml-miR-378a-5p	92447798	92447819	acuggacuuggagucagaagac	mml-miR-378a-3p	92447832	92447855	cauucccugcucuaagucccauuu
yes	yes	yes	ENSMMUT00000036574	mml-mir-378a	CM002982.3	+	147861394	147861459	agggcuccugacuccagguccuguguguuaccucgaaauagcacuggacuuggagucagaaggccu	66	mml-mir-378a-5p	NA	NA	NA	mml-mir-378a-3p	147861436	147861456	acuggacuuggagucagaagg
		yes	ENSMMUT00000072284	mml-mir-378a-1	CM002992.3	-	84013462	84013537	gggagcacuggacuaagagucagaagguggaguucugggcacugucuuuccacucguggacccugggcauguucug	76	mml-mir-378a-1-5p	84013468	84013488	acuggacuaagagucagaagg	mml-mir-378a-1-3p	84013516	84013536	cguggacccugggcauguucu
		yes	ENSMMUT00000068465	mml-miR-378a-2	CM002982.3	+	152936075	152936157	acagaagcacuggacuuggugucagaugggaugagcccuggcucuguuuccuaguagcaaucugaucuugaacuagucacugg	83	mml-miR-378a-2-5p	152936083	152936103	acuggacuuggugucagaugg	mml-miR-378a-2-3p	152936112	152936132	cuggcucuguuuccuaguagc
yes				mml-miR-378b	CM002977.3	+	13705702	13705800	cagaagcugaauuagggugcaagcguucgggcuucagucccuuaaauuacccuucuuuggaaggaauaauggacuuggagucagaaggcuagauuucaa	99	mml-miR-378b-5p	13705725	13705744	cguucgggcuucagucccuu	mml-miR-378b-3p	13705771	13705791	uggacuuggagucagaaggcu
yes				mml-miR-378c	CM002994.2	+	57544983	57545131	agauagccaaaguuguccccggauucccuccuuuuccuccuccuuugguucagugucuuauugcugcaacgcccuucaagagaggcggccgugauguagcggggagacggcuggacuuggagccagaaggucuaugugugauuuuggcc	149	mml-miR-378c-5p	57545014	57545037	uuuuccuccuccuuugguucagug	mml-miR-378c-3p	57545093	57545112	cuggacuuggagccagaagg
yes	yes	yes	ENSMMUT00000055945	mml-mir-378d	CM002981.2	-	6141470	6141581	gcacuuggcccagaguucacacucagggcucauugcugccauuguuucugucuucguuccuguuguuauuacuggacuuggagucagaagcagguucgaaucccaacuccac	112	mml-mir-378d-5p	NA	NA	NA	mml-mir-378d-3p	6141540	6141561	acuggacuuggagucagaagca
	yes	yes	ENSMMUT00000055749	mml-mir-378j	CM002994.2	-	43640938	43641046	augcagugagugggggaggaacuggauuuggagccagaagaacugguucuaauaucuacuucccuguguagaguugggauuugggauuauaugaguuaguacacaccaa	109	mml-mir-378j-5p	43640958	43640976	acuggauuuggagccagaa	mml-mir-378j-3p	NA	NA	NA
yes	yes	yes	ENSMMUT00000048596	mml-mir-379	CM002991.3	+	163357370	163357436	agagaugguagacuauggaacguaggcguuaugauuuuugaccuauguaacaugguccacuaacucu	67	mml-mir-379-5p	163357375	163357395	ugguagacuauggaacguagg	mml-mir-379-3p	163357413	163357433	uauguaacaugguccacuaac
yes	yes	yes	ENSMMUT00000048593	mml-mir-380	CM002991.3	+	163360318	163360378	aagaugguugaccauagaacaugcgcuaucucugugucguauguaauaugguccacgucuu	61	mml-mir-380-5p	163360321	163360342	augguugaccauagaacaugcg	mml-mir-380-3p	163360357	163360378	uauguaauaugguccacgucuu
yes	yes	yes	ENSMMUT00000036796	mml-mir-381	CM002991.3	+	163379925	163379999	uacuuaaagcgagguugcccuuuguauauucgguuuauugacauggaauauacaagggcaagcucucugugagua	75	mml-mir-381-5p	163379932	163379954	agcgagguugcccuuuguauauu	mml-mir-381-3p	163379973	163379994	uauacaagggcaagcucucugu
yes	yes	yes	ENSMMUT00000036709	mml-mir-382	CM002991.3	+	163388320	163388395	uacuugaagagaaguuguucgugguggauucgcuuuacuuaugacgaaucauucacggacaacacuuuuuucagua	76	mml-mir-382-5p	163388330	163388351	gaaguuguucgugguggauucg	mml-mir-382-3p	163388366	163388388	aaucauucacggacaacacuuuu
yes	yes	yes	ENSMMUT00000036817	mml-mir-383	CM002985.3	-	14506082	14506154	cuccucagaucagaaggugauuguggcuuuggguggauauuaaucagccacagcacugccuggucagaaagag	73	mml-mir-383-5p	14506088	14506109	agaucagaaggugauuguggcu	mml-mir-383-3p	NA	NA	NA
	yes	yes	ENSMMUT00000036823	mml-mir-384	CM002997.3	-	70894088	70894175	uguuaaauuaggaauuguaaacaauuccuaggcaauauguauaauguucauaagacauuccuagaaauuguucauaaugccuguaaca	88	mml-mir-384-5p	NA	NA	NA	mml-mir-384-3p	70894144	70894163	auuccuagaaauuguucaua
yes	yes	yes	ENSMMUT00000036677	mml-mir-409	CM002991.3	+	163399096	163399174	ugguacucggggagagguuacccgagcaacuuugcaucuggacgacgaauguugcucggugaaccccuuuucgguauca	79	mml-mir-409-5p	163399110	163399132	agguuacccgagcaacuuugcau	mml-mir-409-3p	163399142	163399163	gaauguugcucggugaaccccu
yes	yes	yes	ENSMMUT00000048461	mml-mir-410	CM002991.3	+	163399706	163399785	gguaccugaggagagguugucugugaugaguucgcuuuuauuaaugacgaauauaacacagauggccuguuuucaguacc	80	mml-mir-410-5p	163399719	163399739	agguugucugugaugaguucg	mml-mir-410-3p	163399755	163399775	aauauaacacagauggccugu
yes	yes	yes	ENSMMUT00000036750	mml-mir-411	CM002991.3	+	163358629	163358710	ugguacuuggagagauaguagaccguauagcguacgcuuuaucugugacguauguaacacgguccacuaacccucaguauca	82	mml-mir-411-5p	163358644	163358664	uaguagaccguauagcguacg	mml-mir-411-3p	163358679	163358699	uauguaacacgguccacuaac
yes	yes	yes	ENSMMUT00000036720	mml-mir-412	CM002991.3	+	163399243	163399333	cugggguacggggauggauggucgaccaguuggaaaguaauuguuucuaauguacuucaccugguccacuagccguccguauccgcugcag	91	mml-mir-412-5p	163399261	163399280	uggucgaccaguuggaaagu	mml-mir-412-3p	163399296	163399318	acuucaccugguccacuagccgu
	yes	yes	ENSMMUT00000036734	mml-mir-421	CM002997.3	-	68771903	68771981	cacauuguaggccucauuaaauguuuguugaaugaaaaaaugaaucaucaacagacauuaauugggcgccugcucugug	79	mml-mir-421-5p	NA	NA	NA	mml-mir-421-3p	68771949	68771971	aucaacagacauuaauugggcgc
	yes	yes	ENSMMUT00000036601	mml-mir-422a	CM002991.3	-	40461056	40461145	gagagaagcacuggacucagggucagaaggccugagucucccugcugcagaugggcugugugucccugagccaagccuuguccucccugg	90	mml-mir-422a-5p	40461065	40461086	acuggacucagggucagaaggc	mml-mir-422a-3p	NA	NA	NA
yes	yes			mml-mir-423	CM002994.2	+	24183848	24183941	auaaaggaaguuaggcugaggggcagagagcgagacuuuucuauuuuccaaaagcucggucugaggccccucagucuugcuuccuaccccgcgc	94	mml-mir-423-5p	24183864	24183886	ugaggggcagagagcgagacuuu	mml-mir-423-3p	24183900	24183922	agcucggucugaggccccucagu
yes	yes	yes	ENSMMUT00000036742	mml-mir-424	CM002997.3	-	128518416	128518513	cgaggggauacagcagcaauucauguuuugaaguguucuaaaugguucaaaacgugaggcgcugcuauacccccucguggggaagguagaaggugggg	98	mml-mir-424-5p	128518426	128518447	cagcagcaauucauguuuugaa	mml-mir-424-3p	128518464	128518484	aaaacgugaggcgcugcuaua
	yes	yes	ENSMMUT00000036639	mml-mir-425	CM002980.3	+	93359182	93359268	gaaagcgcuuuggaaugacacgaucacucccguugagugggcccccgagaagccaucgggaaugucguguccgcccagugcucuuuc	87	mml-mir-425-5p	93359195	93359217	aaugacacgaucacucccguuga	mml-mir-425-3p	NA	NA	NA
yes	yes	yes	ENSMMUT00000048736	mml-mir-429	CM002977.3	+	261052	261134	cgccggccgaugagcgucuuaccagacacgguuagaccuggcucucugucuaauacugucugguaaaaccguccauccgcggc	83	mml-mir-429-5p	261067	261087	gucuuaccagacacgguuaga	mml-mir-429-3p	261102	261123	uaauacugucugguaaaaccgu
yes	yes	yes	ENSMMUT00000048373	mml-mir-431	CM002991.3	+	163215205	163215318	uccugcuuguccugcgaggugucuugcaggccgucaugcaggccacacugacgguaacguugcaggucgucuugcagggcuucucgcaagacgacauccucaucaccaacgacg	114	mml-mir-431-5p	163215224	163215244	ugucuugcaggccgucaugca	mml-mir-431-3p	NA	NA	NA
yes	yes	yes	ENSMMUT00000048607	mml-mir-432	CM002991.3	+	163218684	163218777	ugacuccuccaugucuuggaguaggucauuggguggauccucuauuuccuuaugugggccacuggauggcuccuccaugucuuggaguagauca	94	mml-mir-432-5p	163218697	163218719	ucuuggaguaggucauugggugg	mml-mir-432-3p	163218746	163218765	uggauggcuccuccaugucu
yes	yes	yes	ENSMMUT00000048396	mml-mir-433	CM002991.3	+	163216084	163216176	ccagggagaaguacggugagccugucauuauucagagaggcuagauccucuguguugagaaggaucaugaugggcuccucgguguucuccagg	93	mml-mir-433-5p	163216095	163216116	uacggugagccugucauuauuc	mml-mir-433-3p	163216147	163216168	aucaugaugggcuccucggugu
yes	yes	yes	ENSMMUT00000048479	mml-mir-448	CM002997.3	+	108672772	108672882	gccgggagguugaacauccugcauagugcugccaggaaaucccuauuucauacuaagaggggcuggcugguugcauauguaggaugucccaucucccagccuacuucguca	111	mml-mir-448-5p	NA	NA	NA	mml-mir-448-3p	108672842	108672863	uugcauauguaggaugucccau
yes	yes	yes	ENSMMUT00000036784	mml-mir-449a	CM002982.3	-	56077670	56077760	cugugugugaugagcuggcaguguauuguuagcugguugaauaugugaauggcaucagcuaacaugcaacugcugucuuauugcauauaca	91	mml-mir-449a-5p	56077685	56077706	uggcaguguauuguuagcuggu	mml-mir-449a-3p	56077725	56077746	cagcuaacaugcaacugcuguc
yes	yes	yes	ENSMMUT00000049019	mml-mir-449b	CM002982.3	-	56077784	56077880	ugaccugaaucagguaggcaguguauuguuagcuggcugcuugagucaagucagcagccacaacuacccugccacuugcuucuggauaaauucuucu	97	mml-mir-449b-5p	56077799	56077820	aggcaguguauuguuagcuggc	mml-mir-449b-3p	56077838	56077859	cagccacaacuacccugccacu
yes	yes	yes	ENSMMUT00000036599	mml-mir-450a-1	CM002997.3	-	128512137	128512227	aaaugauacuaaacuguuuuugcgauguguuccuaauauguacuauaaauauauugggaacauuuugcauguguaguuuuguaucaauaua	91	mml-mir-450a-1-5p	128512154	128512175	uuuugcgauguguuccuaauau	mml-mir-450a-1-3p	128512189	128512210	auugggaacauuuugcaugugu
	yes	yes	ENSMMUT00000036619	mml-mir-450a-2	CM002997.3	-	128512304	128512403	ccaaagaaagaugcuaaacuauuuuugcgauguguuccuaauauguaauauaaauguauuggggacauuuugcauucauaguuuuguaucaauaauaugg	100	mml-mir-450a-2-5p	128512326	128512347	uuuugcgauguguuccuaauau	mml-mir-450a-2-3p	128512361	128512382	auuggggacauuuugcauucau
	yes	yes	ENSMMUT00000049211	mml-mir-450b	CM002997.3	-	128511981	128512058	gcagaauuauuuuugcaauauguuccugaauauguaguauaagcguauugggaucauuuugcauccauaguuuuguau	78	mml-mir-450b-5p	128511991	128512012	uuuugcaauauguuccugaaua	mml-mir-450b-3p	128512028	128512049	uugggaucauuuugcauccaua
yes	yes	yes	ENSMMUT00000048850	mml-mir-451	CM002994.2	-	22890441	22890512	cuugggaauggcaaggaaaccguuaccauuacugaguuuaguaaugguaaggguucucuugcuauauccaga	72	mml-mir-451-5p	22890457	22890478	aaaccguuaccauuacugaguu	mml-mir-451-3p	NA	NA	NA
yes	yes	yes	ENSMMUT00000036785	mml-mir-452	CM002997.3	-	145594534	145594618	gcuaagcacuuacaacuguuugcagaggaaacugagacuuuguaacuaugucucagucucaucugcaaagaaguaagugcuuugc	85	mml-mir-452-5p	145594547	145594568	aacuguuugcagaggaaacuga	mml-mir-452-3p	145594588	145594609	agucucaucugcaaagaaguaa
yes	yes	yes	ENSMMUT00000038131	mml-mir-454	CM002994.2	+	30504551	30504665	ucuguuuaucaccagauccuagaacccuaucaauauugucucugcuguguaaauaguucugaguagugcaauauugcuuauaggguuuugguguuugggaagaacaaugggcagg	115	mml-mir-454-5p	30504578	30504595	uaucaauauugucucugc	mml-mir-454-3p	30504614	30504636	uagugcaauauugcuuauagggu
yes	yes	yes	ENSMMUT00000036632	mml-mir-455	CM002986.2	-	25201134	25201229	ucccuggcgugaggguaugugccuuuggacuacaucguggaagccagcaccaugcaguccaugggcauauacacuugccucaaggccuaugucauc	96	mml-mir-455-5p	25201149	25201170	uaugugccuuuggacuacaucg	mml-mir-455-3p	25201187	25201207	gcaguccaugggcauauacac
yes				mml-miR-466a	CM002980.3	-	24869460	24869608	agaauuaaaguguguguauguguguguguguauauauauguguguguguguauuuauauauauguguguguauauauauguguauauaucuauguguguguauauauauauauacacacacacauauauauaaaccuaaaagcuuuaga	149	mml-miR-466a-5p	24869481	24869499	guguguguguauauauaug	mml-miR-466a-3p	24869567	24869585	auauauacacacacacaua
yes				mml-miR-466aa	NC_007862.1	+	29728932	29729030	uauauacacacacauauacauacacguguauauauacacacacacauauauaaauauauauauacacguguguguguguauauauauguucuuuccuuu	99	mml-miR-466aa-5p	29728958	29728976	uguauauauacacacacac	mml-miR-466aa-3p	29729001	29729019	guguguguguauauauaug
yes				mml-miR-466ab	CM002981.2	-	95021216	95021314	cauguauccuagaacuuaaaguguguguguguguguguguguguauauauauguguguguauauauauauauauacacacacacauauaaacccaguug	99	mml-miR-466ab-5p	95021250	95021268	guguguguguauauauaug	mml-miR-466ab-3p	95021276	95021293	auauauauauauauacac
yes				mml-miR-466ad	CM002979.2	-	121486934	121487136	uauguguauguguguauauguguacguguauguguguauauguguguguauguauaugcauauguguguaugcauauguguauauguaugugugugcuugugaauguguaaguauaugcauauauauguaugcauauguguguaugugugugugugcauguacaugugaauguguagguacaugugugugugcauugugcaug	203	mml-miR-466ad-5p	121486965	121486985	guguguauauguguguguaug	mml-miR-466ad-3p	121487089	121487106	gcauguacaugugaaugu
yes				mml-miR-466ae	NC_007864.1	+	107825510	107825708	aauacuacuuaauaaacuccauuuauauauauauguaugcuuauauauauauguguauguauuauauauguaugcuuauauauguguguguauguauauauauguauauauguguacauauauacauauauacacacacacauauaguaaauacuacuuaauaaacuccauauauguauguuuauauauauaugugugu	199	mml-miR-466ae-5p	107825592	107825613	uguguguguauguauauauaug	mml-miR-466ae-3p	107825636	107825653	uauauacacacacacaua
yes				mml-miR-466af	NC_007864.1	+	159009341	159009440	uauauacuagaaaacaaguguguguguguguauauauauguguguaugcacacuucuugugugaguguguguguauauauauauauacacacacacauaa	100	mml-miR-466af-5p	159009362	159009380	guguguguguauauauaug	mml-miR-466af-3p	159009420	159009438	uauauauacacacacacau
yes				mml-miR-466ag	NC_007865.1	+	58536495	58536643	acauucgucaaaaggaaaucuucaaaaucuuuuaaaacgauuauauauauauacacacacacauauauguauguauguguauauauauuauauguguguguguguguguauauauauguauauaaauuuuuuuuuuuuuuuugagaugg	149	mml-miR-466ag-5p	58536536	58536552	uauauauauauacacac	mml-miR-466ag-3p	58536594	58536612	guguguguguauauauaug
yes				mml-miR-466ah	NC_007865.1	+	127998619	127998817	guauaucauauaugugauauauaugauauaucuuguguguguauauauacacacacacauacacacacacaaagguauauauacacauacacacauauguauguguguguauguguauguauaccuuuguguguguguauguguguguguauauauacacacacaagauauaucauauauaucacauauaugauauaca	199	mml-miR-466ah-5p	127998696	127998714	uauauacacauacacacau	mml-miR-466ah-3p	127998723	127998741	guguguauguguauguaua
yes				mml-miR-466aj	CM002992.3	-	31360614	31360812	cagccugggcgacagagcgagacuccgucucaaaaaacaaacaaacaaacaacaacaacaaaaaaauuguguguguguguguguguguguguguguguguauauguauauguauauguauauauacacacacacauauauauagauaugcuuacauuuuuuuuuuauaaggacguggucucgcuauguuuccaaggcua	199	mml-miR-466aj-5p	31360618	31360639	cugggcgacagagcgagacucc	mml-miR-466aj-3p	31360791	31360810	ucucgcuauguuuccaaggc
yes				mml-miR-466ak	JSUE03334457.1	-	333	476	auacacacacacacauauauauguauacauauauacacacauauauauacacacacacauauauauguguguauauauauguauacauauauauguguguguguguauauauauguauacauguauauauacguguguguguau	144	mml-miR-466ak-5p	374	392	uauauauacacacacacau	mml-miR-466ak-3p	429	447	guguguguguauauauaug
yes				mml-miR-466am	CM002989.3	+	90103272	90103372	aauuagcuggaugguaaauacauggguuuuugauauaguuuuuucuucaccaaauuauaugcuuuaagauuauauauacacacacacauagauauauacau	101	mml-miR-466am-5p	90103277	90103295	gcuggaugguaaauacaug	mml-miR-466am-3p	90103342	90103360	uauauauacacacacacau
yes				mml-miR-466aq	CM002988.2	-	120733145	120733343	cugaauugccucaaacacacuucuuccaaaagaauaauauuuuuccucaaguuuuauauguauauauauauauauacacacacacauauauauguguguguguguguguguguauauacacacacguauauuuguguguguguguguguauauauauauauauuuuuuuuuuuuugagacagaguuuugcucuuguugc	199	mml-miR-466aq-5p	120733179	120733195	uaauauuuuuccucaag	mml-miR-466aq-3p	120733319	120733336	ugagacagaguuuugcuc
yes				mml-miR-466ar	NC_007872.1	+	46171412	46171610	aaaauguuuucccuucauauguacauauauauaaauacacacacauauauauucacauauauauacacacacacauauauacauauauguguauacauacauauauauacguguguguguguauauauaugugaauauauauguguguguguuuauauauaugaauucacuaauuuacauagaagagcucggaacuacu	199	mml-miR-466ar-5p	46171469	46171489	uauauauacacacacacauau	mml-miR-466ar-3p	46171524	46171542	guguguguguauauauaug
yes				mml-miR-466as	CM002986.2	-	87505113	87505211	ggauuuuuguugcaccuucucucucucucucguguguguguguguguauauauauguauauauauauacacacacacauauauacauauauauauauau	99	mml-miR-466as-5p	87505150	87505168	guguguguguauauauaug	mml-miR-466as-3p	87505174	87505192	auauauacacacacacaua
yes				mml-miR-466b	CM002994.2	-	60601145	60601243	acuuuggccuuauaauucaaauauauacacacacacauagauacacauguuuguguguaucuguguguguguauauauauguguauguauauaugugca	99	mml-miR-466b-5p	60601167	60601184	auauacacacacacauag	mml-miR-466b-3p	60601207	60601225	guguguguguauauauaug
yes				mml-miR-466d	NC_007874.1	+	51197298	51197446	agcuuggaaaauuauauauacauauguguguguauauauauacacacacacauauauauauacacuuucauauccguguguguuuauguguguguguguguauauauauggcugaaaauauauauggcagaacugauuagaagacaucu	149	mml-miR-466d-5p	51197333	51197350	auauauacacacacacau	mml-miR-466d-3p	51197389	51197407	guguguguguauauauaug
yes				mml-miR-466e	NC_007877.1	+	25332668	25332766	aaaaggaaaaaaaaaaaaauauauauauauacacacacacauauauauauguguauauauauguguauauauauguguguguguguauauauaugugug	99	mml-miR-466e-5p	25332691	25332709	uauauauacacacacacau	mml-miR-466e-3p	25332744	25332762	guguguguguauauauaug
yes				mml-miR-466f	CM002997.3	-	7612938	7613036	augcauauguauaucuauguaugugucuguguguauauguguguauguauauacacauuauauauacacacacacauauauauaaauuucacauggaaa	99	mml-miR-466f-5p	7612959	7612976	ugugucuguguguauaug	mml-miR-466f-3p	7613000	7613017	uauacacacacacauaua
yes				mml-miR-466g	CM002997.3	-	27701267	27701365	uauguguguguguguauauauauguauacacacacacauacacauauauacacacauauacauauauguauaugcguauauauauacacacacacauac	99	mml-miR-466g-5p	27701272	27701290	guguguguguauauauaug	mml-miR-466g-3p	27701343	27701361	uauauauauacacacacac
yes				mml-miR-466h	CM002997.3	-	87831061	87831209	uucacagaauucuuucacaaagaacauauauauauguaugugugcauauauauauauacacacacacauauauauauaucugguguguguguguguauauauaugcauuuuaaccacauauauuuaaccauguauauguauguauagau	149	mml-miR-466h-5p	87831107	87831125	uauauauauauacacacac	mml-miR-466h-3p	87831147	87831165	guguguguguauauauaug
yes				mml-miR-466i	NW_001099647.1	-	327	425	gcaaaaugacaugacauauguauauauguguguguguguauauauauguauguauauguauauauauacacacacacauacacaauuuauaauauauga	99	mml-miR-466i-5p	356	374	guguguguguauauauaug	mml-miR-466i-3p	385	403	uauauauauacacacacac
yes				mml-miR-466j	NW_001134279.1	-	381	479	gcacauauauacacacacacauauacauacacguguauauauauacacacauauauaaauauauauacacacguguguguguguguauauauauguucu	99	mml-miR-466j-5p	386	404	uauauacacacacacauau	mml-miR-466j-3p	457	475	guguguguguauauauaug
yes				mml-miR-466k	NC_007859.1	-	134054141	134054239	cacacacacacacacacuuacauauguguguguguauauauauguauauguguguauauauauguauauauacacacacacauauaaagagugugcugc	99	mml-miR-466k-5p	134054166	134054184	guguguguguauauauaug	mml-miR-466k-3p	134054205	134054223	uauauauacacacacacau
yes				mml-miR-466l	NC_007864.1	+	84811875	84811973	gcacacacaauuacaaggcuaaguuuuauauauauauguguguguguauauauauguacauauauguauguauacacauacauacacacacacauauac	99	mml-miR-466l-5p	84811912	84811930	guguguguguauauauaug	mml-miR-466l-3p	84811952	84811969	auacauacacacacacau
yes				mml-miR-466p	NC_007874.1	+	36382823	36382971	uuugguggcaugagguuauacauaugugaggcuauauauacacauauauauguguguguguauauauauguauguauauauguacacacacguauaauauacauacacacauacauauauauauauuucuuaaaaguacuuuaaguuag	149	mml-miR-466p-5p	36382874	36382892	guguguguguauauauaug	mml-miR-466p-3p	36382915	36382934	uauaauauacauacacacau
yes				mml-miR-466q	NC_007859.1	-	172645033	172645131	ccugcgcauacccuuccuauauauauguguguguguauguauauauauguguguguaaacauacauauauauauacacacacacauacuuuggagauaa	99	mml-miR-466q-5p	172645060	172645081	uguguguguauguauauauaug	mml-miR-466q-3p	172645098	172645117	uauauauauacacacacaca
yes				mml-miR-466s	CM002982.3	-	22242288	22242486	caaguguucugugauguaaauucauuuguguauauauguguauauauauauacacacacacauauauauacauucugcgcauucauaacucuuuauaaauuguuauaaagcuaaacgugugaaacguguguguguguguguguguauauauauguauauucauagagucucaaagucaugaaaucauacucuaggauaa	199	mml-miR-466s-5p	22242332	22242350	uauauauacacacacacau	mml-miR-466s-3p	22242423	22242441	guguguguguauauauaug
yes				mml-miR-466t	CM002991.3	-	73979499	73979697	uaucuaccuauauauauagaaggggauauauauauauacacacacauacacaugcacacauauauauagguauauauauacacacacacauauaucuagggauauauauacauauguguauauauauguguguguguauauauauguauguguauguguauguacguguguguguguguguguguguguguaugguagc	199	mml-miR-466t-5p	73979565	73979585	uagguauauauauacacacac	mml-miR-466t-3p	73979626	73979644	guguguguguauauauaug
yes				mml-miR-466w	NC_007861.1	+	65968958	65969106	uggaauuaguacauauauauguguguguguauauauauguguauauauguauauacauacauauguauauauauguauauacauauguauauauauguguguauauauauacacacacacauacacucacauauauguagugccuucuu	149	mml-miR-466w-5p	65968978	65968996	guguguguguauauauaug	mml-miR-466w-3p	65969075	65969089	cacauacacucacau
yes				mml-miR-466z	CM002983.2	-	131545202	131545400	ccucuucuugaauuuuaacaaucagcuuugcagaguuugguccuauucuuguauuauguguaucccaauguguguguguguauguauauauaugccauaugcauauauuauauaacauauauauuaucugguacauauauauacacacacacauauaucgcauauuagauaaucucucauaaugucaguguguauugua	199	mml-miR-466z-5p	131545274	131545295	uguguguguauguauauauaug	mml-miR-466z-3p	131545336	131545354	auauauauacacacacaca
yes				mml-miR-467a	NW_001102446.1	-	5576	5724	cacacaaaauugcuguuuauugccugaaauagcuuauguguaggcuugucagacgugugugucuguguguauauguuuauauacacauauauacauacacacacauauugauugcacuguuuacagcaugggaaaggaacacagguaac	149	mml-miR-467a-5p	5633	5650	ugugucuguguguauaug	mml-miR-467a-3p	5663	5680	uauauacauacacacaca
yes				mml-miR-467b	CM002980.3	-	90723847	90723997	auguguguguguguauauauacguauauauguguguguguauauauacacacuguuauauauaucuaaaaauauauauauauauaaaccgauauauauauggcuauauacauacacacacauauauacacauauauauauagugccauaua	151	mml-miR-467b-5p	90723849	90723867	guguguguguguauauaua	mml-miR-467b-3p	90723977	90723994	auauauauauagugccau
yes				mml-miR-467c	NC_007875.1	+	44029088	44029186	agacucuaucucaaaaauauauaaauauacauacacacacauauguguauguauauauguguguguguauauauauguauaaccacaguacuguuauac	99	mml-miR-467c-5p	44029109	44029129	uaaauauacauacacacacau	mml-miR-467c-3p	44029146	44029164	guguguguguauauauaug
	yes	yes	ENSMMUT00000036827	mml-mir-484	CM002993.2	+	15445602	15445664	gucaggcucaguccccucccgauaaaccccuaaauagggacuuucccggggggugacccuggc	63	mml-mir-484-5p	15445603	15445624	ucaggcucaguccccucccgau	mml-mir-484-3p	NA	NA	NA
yes	yes	yes	ENSMMUT00000036549	mml-mir-485	CM002991.3	+	163389434	163389506	acuuggagagaggcuggccgugaugaauucgauucaucaaagcgagucauacacggcucuccucucuuuuagu	73	mml-mir-485-5p	163389442	163389463	agaggcuggccgugaugaauuc	mml-mir-485-3p	163389479	163389500	gucauacacggcucuccucucu
yes		yes	ENSMMUT00000049622	mml-miR-486	CM002985.3	+	43114968	43115119	ugcugggggcuucaguggccggcucugaucuccauccucccuggggcauccuguacugagcugccccgaggcccuucaugcugcccagcucggggcagcucaguacaggauaccucggggugggagucagcaggaggugagggggcauggug	152	mml-miR-486-5p	43115016	43115037	uccuguacugagcugccccgag	mml-miR-486-3p	43115058	43115080	cggggcagcucaguacaggauac
	yes			mml-mir-486	CM002985.3	-	43115013	43115080	guauccuguacugagcugccccgagcugggcagcaugaagggccucggggcagcucaguacaggaugc	68	mml-mir-486-5p	43115016	43115037	uccuguacugagcugccccgag	mml-mir-486-3p	43115058	43115078	cggggcagcucaguacaggau
	yes	yes	ENSMMUT00000048980	mml-mir-487a	CM002991.3	+	163386465	163386544	gguacuuggagaguggucaucccugcuguguucgcuuuguuuaugacgaaucauacagggacauccaguuuuucaguauc	80	mml-mir-487a-5p	NA	NA	NA	mml-mir-487a-3p	163386513	163386534	aaucauacagggacauccaguu
	yes	yes	ENSMMUT00000048439	mml-mir-487b	CM002991.3	+	163380460	163380543	uugguacuuggagagugguuaucccuguccuguucguuuugcucgugucgaaucguacagggucauccacuuuuucaguaucaa	84	mml-mir-487b-5p	163380474	163380495	gugguuaucccuguccuguucg	mml-mir-487b-3p	163380510	163380531	aaucguacagggucauccacuu
yes	yes	yes	ENSMMUT00000036631	mml-mir-488	CM002977.3	+	190531966	190532048	gagaaucaucucucccagauaauggcacucucaaacaaguuuccaaguuguuugaaaggcuauuucuuggucagaugacucuc	83	mml-mir-488-5p	190531979	190532001	cccagauaauggcacucucaaac	mml-mir-488-3p	190532017	190532037	uugaaaggcuauuucuugguc
yes	yes	yes	ENSMMUT00000048854	mml-mir-489	CM002984.2	-	118803460	118803543	guggcagcuugguggucguauguguggcgccauuuacuugaaccuuuaggagugacaucacauauacggcagcuaaacuguuac	84	mml-mir-489-5p	118803473	118803494	ggucguauguguggcgccauuu	mml-mir-489-3p	118803511	118803532	gugacaucacauauacggcagc
yes	yes	yes	ENSMMUT00000036819	mml-mir-490	CM002984.2	+	163218943	163219070	uggaggccuugcugguuuggaaaguucauuguucgacaccauggaucuccaggugggucaaguuuagagaugcaccaaccuggaggacuccaugcuguugagcuguucacaagcagcggacacuucca	128	mml-mir-490-5p	163218981	163219000	ccauggaucuccaggugggu	mml-mir-490-3p	163219018	163219039	caaccuggaggacuccaugcug
yes	yes	yes	ENSMMUT00000036814	mml-mir-491	CM002986.2	-	63228029	63228112	uugacuuagcuggguaguggggaacccuuccaugaggaguagaacacuccuuaugcaagauucccuucuaccuggcuggguugg	84	mml-mir-491-5p	63228044	63228065	aguggggaacccuuccaugagg	mml-mir-491-3p	63228078	63228099	cuuaugcaagauucccuucuac
	yes	yes	ENSMMUT00000048398	mml-mir-492	CM002981.2	-	108774350	108774463	acuacagccacuacuacaagaccuucgaggaccugcgggacaagauucuuggugccgucaaugagaacuccaggauuguccugcagaucaacaaugccugucuggcugcagaug	114	mml-mir-492-5p	108774377	108774399	aggaccugcgggacaagauucuu	mml-mir-492-3p	NA	NA	NA
		yes	ENSMMUT00000036545	mml-mir-492-1	CM002989.3	+	9428675	9428785	caauuacagccacuacuucaagaccauggaagaccugcgggacaagagucuuggagucaccauugagaacuccaggauugucuugcagauugacaaugcccgccggccugc	111	mml-mir-492-1-5p	9428704	9428726	aagaccugcgggacaagagucuu	mml-mir-492-1-3p	9428750	9428772	gauugucuugcagauugacaaug
		yes	ENSMMUT00000048370	mml-mir-492-2	CM002987.3	-	64333680	64333793	acuacacccacuacuuuaagaccaucaaggaccuacgggacaagauucucacugccaccacugagaacuucaggauuguccugaugaucaacagcacccaucgggcugcagaug	114	mml-mir-492-2-5p	64333707	64333728	aggaccuacgggacaagauucu	mml-mir-492-2-3p	NA	NA	NA
		yes	ENSMMUT00000048376	mml-miR-492-3	CM002989.3	+	94645766	94645881	caacuacagccacuacuguaggaccaucgaggaccugcaggacaagauucuuggugccaucauugaaaacuccaggauuguccuacagaucgacaacacccaucuggcugcagaug	116	mml-miR-492-3-5p	94645795	94645817	aggaccugcaggacaagauucuu	mml-miR-492-3-3p	NA	NA	NA
yes	yes	yes	ENSMMUT00000036711	mml-mir-493	CM002991.3	+	163202837	163202925	cuggccuccagggcuuuguacaugguaggcuuucauucauucguuugcacauucggugaaggucuacugugugccaggcccugugccag	89	mml-mir-493-5p	163202852	163202873	uuguacaugguaggcuuucauu	mml-mir-493-3p	163202893	163202914	ugaaggucuacugugugccagg
yes	yes	yes	ENSMMUT00000048845	mml-mir-494	CM002991.3	+	163364071	163364151	gauacucgaaggagagguuguccguguugucuucucuuuauuuaugaugaaacauacacgggaaaccucuucuuuaguauc	81	mml-mir-494-5p	163364085	163364107	agguuguccguguugucuucucu	mml-mir-494-3p	163364118	163364139	ugaaacauacacgggaaaccuc
yes	yes	yes	ENSMMUT00000036627	mml-mir-495	CM002991.3	+	163368266	163368347	ugguaccugaaaagaaguugcccauguuauuuucgcuuuauaugugacgaaacaaacauggugcacuucuuuuucgguauca	82	mml-mir-495-5p	163368279	163368300	gaaguugcccauguuauuuucg	mml-mir-495-3p	163368315	163368336	aaacaaacauggugcacuucuu
yes	yes	yes	ENSMMUT00000048451	mml-mir-496	CM002991.3	+	163394601	163394702	cccgagucagguacucgaauggagguuguccaugguguguucauuuuauuuaugaugaguauuacauggccaaucuccuuucgguacucaauucuucuuggg	102	mml-mir-496-5p	NA	NA	NA	mml-mir-496-3p	163394656	163394677	ugaguauuacauggccaaucuc
yes	yes	yes	ENSMMUT00000036605	mml-mir-497	CM002994.2	-	6978507	6978618	ccaccccgguccugcucccgccccagcagcacacugugguuuguacggcacuguggccacguccaaaccacacugugguguuagagcgagggugggggaggcaccgccgagg	112	mml-mir-497-5p	6978530	6978550	cagcagcacacugugguuugu	mml-mir-497-3p	6978570	6978596	caaaccacacugugguguuagagcgag
	yes	yes	ENSMMUT00000036748	mml-mir-498	CM002996.3	+	49021679	49021802	aauccuccuugggaagugaagcucaggcugugauuucaagccagggggcguuuuucugugacuggaugaaaagcaccuccggggcuugaagcucacaguuugagagcaaucaucuaaggaaguu	124	mml-mir-498-5p	49021712	49021734	uuucaagccagggggcguuuuuc	mml-mir-498-3p	NA	NA	NA
yes				mml-miR-499	CM002992.3	+	29141842	29142042	gucccucccagaguccagggcucccaccccuucccccgcaaacccugcccaggcagcguagggacgggaagcagcacagacuugcugugauguucacguggagaggaguuaaacaucacugcaagucuuaacagcugcccgcccaagacacggggacagggcagggggugaagggcagggcuggaggcuaagagugagggu	201	mml-miR-499-5p	29141916	29141937	cacagacuugcugugauguuca	mml-miR-499-3p	29141954	29141976	acaucacugcaagucuuaacagc
	yes	yes	ENSMMUT00000036667	mml-mir-499	CM002992.3	-	29141883	29142003	gcccuguccccgugucuugggcgggcagcuguuaagacuugcagugauguuuaacuccucuccacgugaacaucacagcaagucugugcugcuucccgucccuacgcugccugggcagggu	121	mml-mir-499-5p	29141914	29141934	uuaagacuugcagugauguuu	mml-mir-499-3p	29141951	29141972	aacaucacagcaagucugugcu
yes	yes	yes	ENSMMUT00000063467	mml-mir-500a	CM002997.3	+	50013494	50013577	gcucccccucucuaauccuugcuaccugggugagagugcuaucugaaugcaaugcaccugggcaaggauucugagagcgagagc	84	mml-mir-500a-5p	50013506	50013528	uaauccuugcuaccugggugaga	mml-mir-500a-3p	50013545	50013567	augcaccugggcaaggauucuga
yes	yes	yes	ENSMMUT00000059683	mml-mir-500b	CM002997.3	+	50017286	50017346	uaauccuugcuaccugggugagagugcuuucugaaugcagugcacccaggcaaggauucug	61	mml-mir-500b-5p	50017286	50017308	uaauccuugcuaccugggugaga	mml-mir-500b-3p	50017327	50017345	gcacccaggcaaggauucu
yes	yes	yes	ENSMMUT00000060528	mml-mir-501	CM002997.3	+	50014785	50014868	gcucuuccucucuaauccuuugucccugggugagagugcuuucugaaugcagugcacccaggcaaggauucugagagggugagc	84	mml-mir-501-5p	50014798	50014819	aauccuuugucccugggugaga	mml-mir-501-3p	50014838	50014856	gcacccaggcaaggauucu
		yes	ENSMMUT00000063822	mml-mir-501-1	CM002997.3	+	50018001	50018083	gcucuuccucucuaauccuuugucccugggugagagugcuuucugaaugcagugcacccaggcaaggauucugcaagggggag	83	mml-mir-501-1-5p	50018014	50018035	aauccuuugucccugggugaga	mml-mir-501-1-3p	50018054	50018075	gcacccaggcaaggauucugca
	yes	yes	ENSMMUT00000048997	mml-mir-502	CM002997.3	+	50021926	50022005	cccucucuaauccuugcuaucugggugcuagugcugucucaaugcaaugcaccugggcaaggauucagagagggggagcu	80	mml-mir-502-5p	50021935	50021955	auccuugcuaucugggugcua	mml-mir-502-3p	50021971	50021992	aaugcaccugggcaaggauuca
		yes	ENSMMUT00000049249	mml-mir-502-1	CM002997.3	+	50011735	50011817	ugcuccuucucuuuaauccuugauacuggugcuagugcucuccacauguaaugcaccuuggcaaggauucggauggggugagc	83	mml-mir-502-1-5p	50011752	50011772	ccuugauacuggugcuagugc	mml-mir-502-1-3p	50011784	50011804	aaugcaccuuggcaaggauuc
yes	yes	yes	ENSMMUT00000036558	mml-mir-503	CM002997.3	-	128518109	128518179	ugcccuagcagcgggaacaguucugcagugagugaucaguacucuggaguauuguuuccgcugccagggua	71	mml-mir-503-5p	128518114	128518136	uagcagcgggaacaguucugcag	mml-mir-503-3p	128518154	128518176	ggaguauuguuuccgcugccagg
yes	yes	yes	ENSMMUT00000036769	mml-mir-504	CM002997.3	-	132543885	132543967	gcugcuguugggagacccuggucugcacucuaucuguauucuuacugaagggagcgcagggcaggguuucccauacagagggc	83	mml-mir-504-5p	132543897	132543918	agacccuggucugcacucuauc	mml-mir-504-3p	132543934	132543954	gggagcgcagggcaggguuuc
yes	yes	yes	ENSMMUT00000036811	mml-mir-505	CM002997.3	-	133863126	133863209	gaugcacccagugggggagccaggaaguauugauguuucugccaguuuagcgucaacacuugcugguuuccucucuggagcauc	84	mml-mir-505-5p	133863139	133863161	ggggagccaggaaguauugaugu	mml-mir-505-3p	133863176	133863197	cgucaacacuugcugguuuccu
yes	yes	yes	ENSMMUT00000048768	mml-mir-506	CM002997.3	-	140946806	140946914	ugucuagugccguuauguguagugccuuauucaggaagguguuacuuaauauauuaauauuuguaaggcacccuucugaguagaguaaugugcaacauggacaucauuu	109	mml-mir-506-5p	140946833	140946852	uauucaggaagguguuacuu	mml-mir-506-3p	140946869	140946889	uaaggcacccuucugaguaga
	yes	yes	ENSMMUT00000048610	mml-mir-507	CM002997.3	-	140947139	140947232	gugcuguguguagugcuucacuucaauaagugccauucaugugucuagaaauauguuuugcaccuuuuggagugaaauaaugcacaacagguac	94	mml-mir-507-5p	NA	NA	NA	mml-mir-507-3p	140947194	140947214	uuuugcaccuuuuggagugaa
	yes			mml-mir-507-2	JSUE03146891.1	+	426	519	gugcuguguguagugcuucacuucaauaagugccauucaugugucuagaaauauguuuugcaccuuuuggagugaaauaaugcacaacagguac	94	mml-mir-507-2-5p	NA	NA	NA	mml-mir-507-2-3p	481	501	uuuugcaccuuuuggagugaa
yes	yes	yes	ENSMMUT00000048701	mml-mir-508	CM002997.3	-	140953010	140953094	ugagugucgugcucuacuccagagggcgucacucacauaaacuaaaacaugauugucgccuuuuugaguagaguaauacacauca	85	mml-mir-508-5p	140953024	140953044	uacuccagagggcgucacuca	mml-mir-508-3p	140953059	140953081	ugauugucgccuuuuugaguaga
yes	yes			mml-mir-509-1	JSUE03286163.1	-	76	169	cauguugugugugguacccuacugcaggcaguggcaauuauguauaguuaaaaaugauugguaugucuguggguagaguaaugcaugacacaug	94	mml-mir-509-1-5p	NA	NA	NA	mml-mir-509-1-3p	130	152	ugauugguaugucuguggguaga
yes	yes	yes	ENSMMUT00000048416	mml-mir-509-2	CM002997.3	-	140966410	140966503	caugcugugugugguacccuacuacaggcaguggcaaucauguauaguuaaaaaugauugguaugucuguggguagaguaaugcaugacacaug	94	mml-mir-509-2-5p	NA	NA	NA	mml-mir-509-2-3p	140966464	140966486	ugauugguaugucuguggguaga
		yes	ENSMMUT00000048755	mml-mir-509-3	CM002997.3	-	140965525	140965618	cauguugugugugguacccuacugcaggcaguggcaaucauguguaguuaaaaaugauugguaugucuguggguagaguaaugcaugacacaug	94	mml-mir-509-3-5p	140965544	140965566	uacugcaggcaguggcaaucaug	mml-mir-509-3-3p	140965579	140965601	ugauugguaugucuguggguaga
yes	yes	yes	ENSMMUT00000048988	mml-mir-510	CM002997.3	-	140974535	140974632	ugcugugugugugugguauccuacuccggagaguggcaaucacauauaauuaagugugauugaaaccucuaagaguggaguaacacaugacauguacu	98	mml-mir-510-5p	140974556	140974578	uacuccggagaguggcaaucaca	mml-mir-510-3p	140974591	140974613	ugauugaaaccucuaagagugga
yes	yes	yes	ENSMMUT00000048435	mml-mir-511	CM002987.3	+	17995109	17995195	caauagacacccaccuugucuuuugcucugcagucaguaaauauuuuuuugugaauguguagcaaaagacagaauggggguccauug	87	mml-mir-511-5p	17995125	17995144	ugucuuuugcucugcaguca	mml-mir-511-3p	17995162	17995183	aauguguagcaaaagacagaau
	yes	yes	ENSMMUT00000048711	mml-mir-512	CM002996.3	+	49017521	49017604	ucucacucuguggcacucagccucgggggcacuuucuggugucagaaugaaagugcugucauugcugagauccaaugacugagg	84	mml-mir-512-5p	49017534	49017556	cacucagccucgggggcacuuuc	mml-mir-512-3p	49017571	49017592	aagugcugucauugcugagauc
		yes	ENSMMUT00000038227	mml-mir-512-1	CM002996.3	+	49015061	49015158	gguacuucucacucuguggcacucagccucgggggcacuuucuggugucagaaugaaagugccgucauugcugagauccaaugacugaggcgagcacc	98	mml-mir-512-1-5p	49015080	49015102	cacucagccucgggggcacuuuc	mml-mir-512-1-3p	49015117	49015139	aagugccgucauugcugagaucc
yes	yes	yes	ENSMMUT00000038246	mml-mir-513a-1	CM002997.3	-	140924359	140924440	guguacagugccuuucacagggaggugucauuuaugugaacuaaacuauaaaugucaccuuucugcgaaggguaauguacau	82	mml-mir-513a-1-5p	140924372	140924393	uucacagggaggugucauuuau	mml-mir-513a-1-3p	NA	NA	NA
	yes	yes	ENSMMUT00000076134	mml-mir-513a-2	CM002997.3	-	140933333	140933412	uguacagugccuuucacagggaggugucauuuaugugaacuaaaauauaaauuucaccuuucugagaagaguaauguaca	80	mml-mir-513a-2-5p	140933345	140933366	uucacagggaggugucauuuau	mml-mir-513a-2-3p	NA	NA	NA
yes	yes	yes	ENSMMUT00000038244	mml-mir-513a-3	CM002997.3	-	140941885	140941966	cuguacauugccuuucacagggaggugucauuuaugugaacuaaacuauaaaugucacuuuucugagaagaguaauguacag	82	mml-mir-513a-3-5p	140941898	140941919	uucacagggaggugucauuuau	mml-mir-513a-3-3p	NA	NA	NA
yes	yes	yes	ENSMMUT00000071336	mml-mir-513b-1	CM002997.3	-	140902107	140902187	uuuacagugccuuucacaaggaggugucauuuaugugaacuaaacuauaaaugucaccuuuuugggaagaguaauguacaa	81	mml-mir-513b-1-5p	140902119	140902140	uucacaaggaggugucauuuau	mml-mir-513b-1-3p	NA	NA	NA
yes	yes	yes	ENSMMUT00000063008	mml-mir-513b-2	CM002997.3	-	140909241	140909321	gugugcagugccuuucacaaggaggugucauuuaugugaacuaaacuauaaaugucaccuuuuugggaagaguaauguaca	81	mml-mir-513b-2-5p	140909254	140909275	uucacaaggaggugucauuuau	mml-mir-513b-2-3p	NA	NA	NA
	yes			mml-mir-513b-3	JSUE03316628.1	-	559	639	uuuacagugccuuucacaaggaggugucauuuaugugaacuaaacuauaaaugucaccuuuuugggaagaguaauguacaa	81	mml-mir-513b-3-5p	571	592	uucacaaggaggugucauuuau	mml-mir-513b-3-3p	NA	NA	NA
yes	yes	yes	ENSMMUT00000048948	mml-mir-514a	CM002997.3	-	140981169	140981260	auguugucugugguacccuacucuggagagugacaaucauguauaauuaaauuugauugacacuucugugaguagaguaaugcaugacacgu	92	mml-mir-514a-5p	140981187	140981207	uacucuggagagugacaauca	mml-mir-514a-3p	140981224	140981244	auugacacuucugugaguaga
	yes	yes	ENSMMUT00000049052	mml-mir-514b	CM002997.3	-	140957046	140957156	auccuuaaauguucuauuccucaugugguacucuucucaagagggaggcaaucauguguaauuagauaugauugacaccucugugaguagaguaacacaugguauuuccau	111	mml-mir-514b-5p	140957079	140957099	uucucaagagggaggcaauca	mml-mir-514b-3p	140957116	140957136	auugacaccucugugaguaga
yes	yes	yes	ENSMMUT00000049081	mml-mir-516a-1	CM002996.3	+	49109628	49109716	ucucaggcugugaccgucucgaggaaagaagcacuuucuguugucuaaagaaaaggaaguguuuccuucccgaggguuacgguuugaga	89	mml-mir-516a-1-5p	49109643	49109664	gucucgaggaaagaagcacuuu	mml-mir-516a-1-3p	49109687	49109704	uguuuccuucccgagggu
yes	yes	yes	ENSMMUT00000049107	mml-mir-516a-2	CM002996.3	+	49114285	49114373	ucucaggcugugaccgucucgaggaaagaagcacuuucuguugucuaaagaaaaggaaguguuuccuucccgaggguuacgguuugaga	89	mml-mir-516a-2-5p	49114300	49114321	gucucgaggaaagaagcacuuu	mml-mir-516a-2-3p	49114344	49114361	uguuuccuucccgagggu
yes	yes	yes	ENSMMUT00000036731	mml-mir-516b	CM002996.3	+	49089836	49089925	ucucaggcugugaccaucuggagguaagaagcacuuucuguuuugugaaagaaaagaaagugcuuccuuucagaggguuacucuuugaga	90	mml-mir-516b-5p	49089851	49089872	aucuggagguaagaagcacuuu	mml-mir-516b-3p	NA	NA	NA
yes	yes	yes	ENSMMUT00000048932	mml-mir-517a	CM002996.3	+	49059963	49060048	cucaugcagugacccucuagauggaagcacugucuguggucuaaaagaaaagaucgugcauccuuuuagaguguuaccguuugaga	86	mml-mir-517a-5p	NA	NA	NA	mml-mir-517a-3p	49060015	49060036	aucgugcauccuuuuagagugu
yes	yes	yes	ENSMMUT00000048455	mml-mir-517b	CM002996.3	+	49115787	49115898	cuggagcaagaagaucucaggcugugaccaucuacagggaagcacuuucuauggucagaaaaagaaagugcauccuuuuagaguguuacuauuugagaaaagcaacauugaa	112	mml-mir-517b-5p	NA	NA	NA	mml-mir-517b-3p	49115851	49115872	aaagugcauccuuuuagagugu
yes	yes	yes	ENSMMUT00000061752	mml-mir-517c	CM002996.3	+	49094936	49095046	uauuggagcgagaagaucuccucaugcagugacacucuaaauggcagcacugucuguggucuaaaacaagaucgugcagccuuuuagaguguuacugugugagaaaagcaa	111	mml-mir-517c-5p	NA	NA	NA	mml-mir-517c-3p	49095006	49095026	aucgugcagccuuuuagagug
		yes	ENSMMUT00000078316	mml-miR-517c-1	CM002996.3	+	49067371	49067459	cucaugcugugacacucuaaauggaagcacugucuguguucuaagaaaagaucgugcagcccuuuagaguguuacugugugagaaaagc	89	mml-miR-517c-1-5p	49067385	49067405	cucuaaauggaagcacugucu	mml-miR-517c-1-3p	49067421	49067441	aucgugcagcccuuuagagug
	yes	yes	ENSMMUT00000048487	mml-mir-518a-1	CM002996.3	+	49066416	49066502	ucucaugcugugacccuacaaagggaagcccuuucuguugucuaaacgaaaagaaagugcuucucuuugcuggguuacgguuugaga	87	mml-mir-518a-1-5p	49066431	49066451	cuacaaagggaagcccuuucu	mml-mir-518a-1-3p	49066469	49066489	aaagugcuucucuuugcuggg
	yes	yes	ENSMMUT00000075568	mml-mir-518a-2	CM002996.3	+	49108097	49108155	cuacaaagggaagcccuuucuguugucuaaacuaaaagaaagugcuucucuuugcuggg	59	mml-mir-518a-2-5p	49108097	49108117	cuacaaagggaagcccuuucu	mml-mir-518a-2-3p	49108135	49108155	aaagugcuucucuuugcuggg
	yes	yes	ENSMMUT00000078829	mml-mir-518a-3	CM002996.3	+	49092967	49093085	cuggagccagaagaucucgggcugugacccuacaaagggaagcccuuucuguugucuaaacgaaaagaaagugcuucucuuugcuggguuacgguuugagaaaagcagcguugaaguug	119	mml-mir-518a-3-5p	49092996	49093016	cuacaaagggaagcccuuucu	mml-mir-518a-3-3p	49093034	49093054	aaagugcuucucuuugcuggg
	yes			mml-mir-518b	CM002996.3	+	49048495	49048577	ucaggcugugacccuccagagggaagcacuuucuguugucugaaagaaagcaaagcgcuccccuuuagaggauuacgguuuga	83	mml-mir-518b-5p	NA	NA	NA	mml-mir-518b-3p	49048545	49048565	caaagcgcuccccuuuagagg
	yes	yes	ENSMMUT00000076742	mml-mir-518c	CM002996.3	+	49056071	49056171	gcgagaagauuucaugcugugacucucuggagggaagcgcuuucuguugucugaaagaaaacaaagcgcuucucuuuagagaguuacgguuugagaaaagc	101	mml-mir-518c-5p	49056098	49056118	uggagggaagcgcuuucuguu	mml-mir-518c-3p	49056132	49056154	caaagcgcuucucuuuagagagu
yes	yes	yes	ENSMMUT00000064001	mml-mir-518d-1	CM002996.3	+	49073236	49073345	gaagaucucaugaugugacucucuagaggaaagcgcuuacuguuggcuaaaaaaauaggaagcgcuucucuuuagaguguuacgcuuugagaaaagcaacgcggaucuug	110	mml-mir-518d-1-5p	49073256	49073277	cucuagaggaaagcgcuuacug	mml-mir-518d-1-3p	49073294	49073314	gaagcgcuucucuuuagagug
	yes	yes	ENSMMUT00000057158	mml-mir-518d-2	CM002996.3	+	49077769	49077827	cucuagaggaaagcgcuuacuguuggcuaaaaaaauaggaagcgcuucucuuuagagug	59	mml-mir-518d-2-5p	49077769	49077790	cucuagaggaaagcgcuuacug	mml-mir-518d-2-3p	49077807	49077827	gaagcgcuucucuuuagagug
	yes	yes	ENSMMUT00000076248	mml-mir-518e	CM002996.3	+	49105593	49105679	ucucaggcugugacccucuagagggaagcgauuucugugaucugaaagaaaagaaaaugguucccuuuagaguguuacuguuugaga	87	mml-mir-518e-5p	NA	NA	NA	mml-mir-518e-3p	49105646	49105667	aaaaugguucccuuuagagugu
yes	yes	yes	ENSMMUT00000065068	mml-mir-518f	CM002996.3	+	49044960	49045046	ucucaggcugugacccucuagagggaagcacuuuaucuugugugaaaggaaagaaagcgcuucccuucagaggauuacucuuugaga	87	mml-mir-518f-5p	NA	NA	NA	mml-mir-518f-3p	49045013	49045033	aaagcgcuucccuucagagga
yes	yes			mml-mir-518g	CM002996.3	+	49075909	49075967	cucuagaggaaagcgcuuucuguuggccaaaagaauaggaagcacuucccuuuagagug	59	mml-mir-518g-5p	49075909	49075931	cucuagaggaaagcgcuuucugu	mml-mir-518g-3p	49075945	49075967	aggaagcacuucccuuuagagug
yes	yes	yes	ENSMMUT00000066657	mml-mir-519a	CM002996.3	+	49046135	49046219	cucaggcugugacccucuagagggaagcgcuuucuguggucugaaagaaaagaaagugcuuccuuuuagaggguuaccguuugag	85	mml-mir-519a-5p	49046148	49046169	ccucuagagggaagcgcuuucu	mml-mir-519a-3p	49046187	49046211	aaagugcuuccuuuuagaggguuac
	yes	yes	ENSMMUT00000070230	mml-mir-519a-2	CM002996.3	+	49039745	49039863	gugcuggagcaagaagaucucaggcucuaacccucuagagggaagcgcuuucugucgucugagagagaagaaagugcauccuuuuagaggauuacgguuugagaaaagcaauggugaag	119	mml-mir-519a-2-5p	49039777	49039798	cucuagagggaagcgcuuucug	mml-mir-519a-2-3p	NA	NA	NA
		yes	ENSMMUT00000077604	mml-mir-519a-3	CM002996.3	+	49053878	49053961	ucucaggcugugacccucuagagggaagcgcuuucuguggucugaaagaaaagaaagugcuuccuuuuagaggguuaccguuug	84	mml-mir-519a-3-5p	49053892	49053913	ccucuagagggaagcgcuuucu	mml-mir-519a-3-3p	49053931	49053955	aaagugcuuccuuuuagaggguuac
		yes	ENSMMUT00000065724	mml-miR-519a-4	CM002996.3	+	49052097	49052181	cucaggcugugaccgucuagagggaagcacuuucuguugcuugaaagaagggaaagcgcuuccuuuuagaggauuacucuuugag	85	mml-miR-519a-4-5p	49052108	49052132	accgucuagagggaagcacuuucug	mml-miR-519a-4-3p	49052149	49052173	aaagcgcuuccuuuuagaggauuac
	yes	yes	ENSMMUT00000055462	mml-mir-519b	CM002996.3	+	49102330	49102410	caugcugugacccucuggagggaagcgcuuucuguugucugaaagaaaagaacgugcaucccuuuagaggguuacucuuug	81	mml-mir-519b-5p	NA	NA	NA	mml-mir-519b-3p	49102380	49102402	aacgugcaucccuuuagaggguu
	yes	yes	ENSMMUT00000064606	mml-mir-519c	CM002996.3	+	49030112	49030198	ucucagucugugacccucuagaaggaagcacuuucuguuguuugaaagaaaagaaagugcaucauuuuagaggauuacaguuugaga	87	mml-mir-519c-5p	NA	NA	NA	mml-mir-519c-3p	49030165	49030186	aaagugcaucauuuuagaggau
	yes	yes	ENSMMUT00000036767	mml-mir-519d	CM002996.3	+	49061111	49061201	ucccaagcugugacccuccaaagggaagcacuuucuguuuguugucugagagaaaacaaagugcuuccuuuuagagugugaccgcuuggga	91	mml-mir-519d-5p	NA	NA	NA	mml-mir-519d-3p	49061167	49061188	caaagugcuuccuuuuagagug
	yes			mml-mir-519e	CM002996.3	+	49028305	49028414	gagaagaucucaugcagucauucuccaaugggaagcaccuucuguggucugaaagcaagcagagggccuccuuuuggagcauuacuguuugagaguaaccacgucgaagu	110	mml-mir-519e-5p	49028325	49028346	uucuccaaugggaagcaccuuc	mml-mir-519e-3p	NA	NA	NA
yes				mml-miR-520	CM002996.3	+	49087845	49087946	ggaagaagauaucgggcugugacccucuaaagggaagcgcuuucuguugugugaaagaaaacgaagcgcuucucuuuggagcguuacaguuugagaagcuca	102	mml-miR-520-5p	49087869	49087891	cucuaaagggaagcgcuuucugu	mml-miR-520-3p	49087909	49087929	agcgcuucucuuuggagcguu
yes	yes	yes	ENSMMUT00000069698	mml-mir-520a	CM002996.3	+	49034604	49034688	cucaggcugugacccuccagagggaaguauuuucuguugucugaaggaaaagaaagugcuucccuuuggacuguuucgguuugag	85	mml-mir-520a-5p	49034619	49034638	uccagagggaaguauuuucu	mml-mir-520a-3p	49034656	49034677	aaagugcuucccuuuggacugu
	yes	yes	ENSMMUT00000048427	mml-mir-520g	CM002996.3	+	49068463	49068552	ucccaugcuguggcccucuagagaaagcacuuucuguuuguugucugaggaaaaacaaagugcuucccuucagaguguggcuguuuggga	90	mml-mir-520g-5p	NA	NA	NA	mml-mir-520g-3p	49068517	49068540	acaaagugcuucccuucagagugu
		yes	ENSMMUT00000074703	mml-mir-520g-1	CM002996.3	+	49096156	49096243	ugccaugcuguggcccucuagagaaagcacuuucuguuuguugucugaggaaaacaaagugcuuccuucagagugugaccauuuggga	88	mml-mir-520g-1-5p	49096171	49096193	cucuagagaaagcacuuucuguu	mml-mir-520g-1-3p	49096209	49096231	acaaagugcuuccuucagagugu
	yes	yes	ENSMMUT00000062635	mml-mir-521	CM002996.3	+	49104021	49104107	ucucaugcugugacccuccaaagggaaguacuuucuguugucuaaaagaaaagaacgcacuucccuuuggaguguuaccguuugaga	87	mml-mir-521-5p	NA	NA	NA	mml-mir-521-3p	49104074	49104095	aacgcacuucccuuuggagugu
yes	yes	yes	ENSMMUT00000073265	mml-mir-523a	CM002996.3	+	49042991	49043077	ucucaggcugugacccucuagagggaagcacuuucuguugucuggaagaaaagaaugcgcuucccuuuagaggguuacucucugaga	87	mml-mir-523a-5p	NA	NA	NA	mml-mir-523a-3p	49043044	49043064	aaugcgcuucccuuuagaggg
yes	yes			mml-mir-523b	CM002996.3	+	49080348	49080436	ucucaugaugugacccucuagagcgaagcgcuuucuguuggcuagaaaagaauaggaagcgcuucccuuuagaguguuacgcuuugaga	89	mml-mir-523b-5p	49080363	49080384	cucuagagcgaagcgcuuucug	mml-mir-523b-3p	NA	NA	NA
yes	yes	yes	ENSMMUT00000054718	mml-mir-524	CM002996.3	+	49057948	49058032	ucaugcugugacccuacaaaggcaagcacuuucucuugucuaaaagaaaagaaggugcuucccuuugcaguguuacgguuugaga	85	mml-mir-524-5p	49057961	49057982	cuacaaaggcaagcacuuucuc	mml-mir-524-3p	49057998	49058019	gaaggugcuucccuuugcagug
	yes	yes	ENSMMUT00000048647	mml-mir-525	CM002996.3	+	49042145	49042230	cucaggcugugacucuccagagggaugcacuuucuuuuaugugaaaaaaaaagaaggcgcaucccuuuggagcguuacgguuuggg	86	mml-mir-525-5p	49042159	49042179	cuccagagggaugcacuuucu	mml-mir-525-3p	NA	NA	NA
	yes	yes	ENSMMUT00000074059	mml-mir-526b	CM002996.3	+	49038951	49039033	ucaggcugugacccucuugagggaagcacuuucuguugucugaauaaaaagaaagugcuuccuuuuagaggcuuacggucuga	83	mml-mir-526b-5p	49038964	49038986	cucuugagggaagcacuuucugu	mml-mir-526b-3p	NA	NA	NA
	yes	yes	ENSMMUT00000055652	mml-mir-532	CM002997.3	+	50008220	50008297	cgacuugcuuucucuccuccaugccuugaguguaggaccguuggcaucuuaauuacccucccacacccaaggcuugca	78	mml-mir-532-5p	50008239	50008260	caugccuugaguguaggaccgu	mml-mir-532-3p	50008276	50008297	ccucccacacccaaggcuugca
yes	yes	yes	ENSMMUT00000036967	mml-mir-539	CM002991.3	+	163381316	163381393	auacuugaggagaaauuauccuugguguguucgcuuuauuuaugaugaaucauacaaggacaauuucuuuuugaguau	78	mml-mir-539-5p	163381324	163381345	ggagaaauuauccuuggugugu	mml-mir-539-3p	NA	NA	NA
yes	yes	yes	ENSMMUT00000049096	mml-mir-541	CM002991.3	+	163398288	163398371	acgucagggaaaggauucugcugucggucccacuccaaagugcauagaauggguggugggcacagaauccggacucugcuugug	84	mml-mir-541-5p	163398297	163398321	aaaggauucugcugucggucccacu	mml-mir-541-3p	163398341	163398362	uggugggcacagaauccggacu
	yes	yes	ENSMMUT00000036968	mml-mir-542	CM002997.3	-	128513131	128513227	cagaccucagacaucucggggaucaucaugucacgagauaccacugugcacuugugacagauugauaacugaaaggucugggagccauucaucuuca	97	mml-mir-542-5p	128513146	128513168	ucggggaucaucaugucacgaga	mml-mir-542-3p	128513183	128513204	ugugacagauugauaacugaaa
	yes	yes	ENSMMUT00000048609	mml-mir-543	CM002991.3	+	163366417	163366496	gguacuuaaugagaaguugcccgugucuuuuucgcuuuauuugugacgaaacauucgcggugcacuucuuuuucaguauc	80	mml-mir-543-5p	163366429	163366450	gaaguugcccgugucuuuuucg	mml-mir-543-3p	163366465	163366486	aaacauucgcggugcacuucuu
yes	yes	yes	ENSMMUT00000037007	mml-mir-544	CM002991.3	+	163382652	163382742	auuuucaucaccuagggaucuuguuaaaaagcagauucugauucagggaccaagauucugcauuuuuagcaaguucucaagugaugcuaau	91	mml-mir-544-5p	NA	NA	NA	mml-mir-544-3p	163382706	163382727	auucugcauuuuuagcaaguuc
		yes	ENSMMUT00000038139	mml-mir-544-1	CM002977.3	+	162629940	162630032	auauggauuaccuugggagcuuguuaaaaugcagauucugauucaggaagucugagauucugcauuucuaucaaguucucaggugaugcugau	93	mml-mir-544-1-5p	162629961	162629982	uguuaaaaugcagauucugauu	mml-mir-544-1-3p	162629996	162630017	auucugcauuucuaucaaguuc
		yes	ENSMMUT00000056037	mml-mir-544-2	CM002992.3	-	49886669	49886762	uugaaucaccuggggaucuuguuaaaaugcagauugauuccgugaaucuggggugaaauucugcauuuuuaacaaguacucaggggaugcugau	94	mml-mir-544-2-5p	49886685	49886704	ucuuguuaaaaugcagauug	mml-mir-544-2-3p	49886726	49886745	auucugcauuuuuaacaagu
yes				mml-miR-544a	CM002995.2	-	9190492	9190591	gugcugggauuacaggcaugagccaccaugccuggccaagaauuuggauuucuaagaaguucccaggugaugcugaugcugaugaugcuguggucugggg	100	mml-miR-544a-5p	9190497	9190517	gggauuacaggcaugagccac	mml-miR-544a-3p	9190569	9190590	gcugaugaugcuguggucuggg
yes				mml-miR-544b	CM002980.3	-	45069316	45069515	ccagacuuucuagaccagugguucucagccuugagccugcaucagagucaccuggaggacuugucaauacacaaguugcucagccucacacccagaguuucugauucagcaggucugggguaggacccaauaaucugcauaucuaacaaguucccaggugaugcuaauuagggaccacacuuugagaaccacugcucuau	200	mml-miR-544b-5p	45069337	45069359	uucucagccuugagccugcauca	mml-miR-544b-3p	45069487	45069505	ggaccacacuuugagaacc
yes				mml-miR-544e	CM002979.2	+	38989934	38990084	aauuuuauguaucagaaucaacuggaggacuuguuaaagcauagauugcugagcccugcccaccccaaaguuucugauucauuuggucugggucggggguugaaaaucuacauuucuaacaaguucccaggugaugcugcuagccuggagg	151	mml-miR-544e-5p	38989953	38989974	aacuggaggacuuguuaaagca	mml-miR-544e-3p	38990048	38990067	ucuaacaaguucccagguga
yes				mml-miR-544f	CM002991.3	+	15812469	15812620	aaaucucagcaugccuuagaaucacgugcaggagcuggcuggagcacagaucgcugagcccuacccucugaauuucugauucaguagauuugugguagugccgagaaucugcgguucugacaaguucccaggugaugcugauugaugcugau	152	mml-miR-544f-5p	15812512	15812530	gcacagaucgcugagcccu	mml-miR-544f-3p	15812568	15812587	gccgagaaucugcgguucug
yes				mml-miR-544g	CM002991.3	+	20292465	20292665	uaccauauuccggaccauugguucucacaccugagucugccucagaaucaccuggagggcuuguuaaaauacagauuucugggcuccaccccuagaguuucuaguucauaggucugcuguggggccugauaauuugcauuucuaacaaguucccaggugaugcugcuguugcuggucuggggaucacuggcaucuguuggu	201	mml-miR-544g-5p	20292519	20292536	gagggcuuguuaaaauac	mml-miR-544g-3p	20292603	20292619	uuucuaacaaguuccca
yes				mml-miR-544i	CM002991.3	+	113952932	113953132	cacaacguucucugugacagcuguucuuaucuugagcacaucagaguuaccuguagggcuuguuaaaacacagauugcuggcccaacccuaggguuucagauucaguaagccugggcuagggcuggagaaugugcgguucuaacaaguucccaggugaugcuguugcugccaauccggggaccagcauugaggaccauugg	201	mml-miR-544i-5p	113952985	113953002	uagggcuuguuaaaacac	mml-miR-544i-3p	113953069	113953084	uucuaacaaguuccca
yes				mml-miR-544j	CM002980.3	+	175097366	175097514	caaacaugcaucagucaccuggagggcuuguuaaaacacagauuacugggucugcccucaagguuucugauucagcacaucugagguggagcccuagaauuugcauuucuaaugaguucccaggugaugcugacauuuuuaguccauag	149	mml-miR-544j-5p	175097383	175097406	ccuggagggcuuguuaaaacacag	mml-miR-544j-3p	175097464	175097487	auuugcauuucuaaugaguuccca
yes	yes	yes	ENSMMUT00000036897	mml-mir-545	CM002997.3	-	68840424	68840529	cccagccuggcacauuaguaggccucaguaaauguuuauuagaugaauaaaugaaugacucaucagcaaacauuuauugugugccugcuaaagugagcuccacagg	106	mml-mir-545-5p	NA	NA	NA	mml-mir-545-3p	68840486	68840507	ucagcaaacauuuauugugugc
yes				mml-miR-548a	CM002983.2	-	131973226	131973389	cuggguagacgguagugggauugcuggaccaaaaacgcuacuuuuauuagguuggugcaaaaguaauuguggauuuugcugauugaaacuaauggcaaaaacugcaguaacuuuuucaccaaccuaauaguucuucaacgaaucuccacacuguuuuccacagu	164	mml-miR-548a-5p	131973284	131973304	aaaaguaauuguggauuuugc	mml-miR-548a-3p	131973321	131973343	caaaaacugcaguaacuuuuuca
yes	yes	yes	ENSMMUT00000048892	mml-mir-548a	CM002983.2	+	18983396	18983493	uccagggagguauuaaguuggugcaaaaguaauugugguuuuuugccauuaaaaguaaugacaauacuggcaauuacuuuuccuccaaaccugauauu	98	mml-mir-548a-5p	NA	NA	NA	mml-mir-548a-3p	18983457	18983478	caauacuggcaauuacuuuucc
yes				mml-miR-548a-1	CM002977.3	-	97566874	97567045	uguucauuaccugcuaacuaugugccagcuuagaugcuguggaugaaaauagguuggugcaaaaguaauugugguuuuuuaauuuuaauggcaaaaaucacaauuacuuuugcaccaaccuauuuucauccacagcaucuaagcuggcacauaguuagcagguaaugaacac	172	mml-miR-548a-1-5p	97566926	97566947	guuggugcaaaaguaauugugg	mml-miR-548a-1-3p	97566973	97566994	acaauuacuuuugcaccaaccu
yes		yes	ENSMMUT00000074830	mml-miR-548a-3	CM002977.3	+	155854755	155854854	gaaggauauauuagguuggagcaaaaguaauugugguuuuugucauuacuuucaacggcaaaaccgcaauuacuuuugcagcaaccuaauacgauucuua	100	mml-miR-548a-3-5p	155854776	155854796	caaaaguaauugugguuuuug	mml-miR-548a-3-3p	155854815	155854836	aaaccgcaauuacuuuugcagc
yes				mml-miR-548a-4	CM002980.3	-	104723924	104724124	cucccuuaguacccagaaagucugugguaucccucacccagcccuacucaacccagucauaguauuaguuuggcccaaaaguaauugugguuuuugcuauuacuuucaauagcaaaaacugugauuacuuuugcaucaaccuaauagcuucuccuccugugggagggugguggugaggggccuuugagcugacccuggguu	201	mml-miR-548a-4-5p	104723999	104724019	caaaaguaauugugguuuuug	mml-miR-548a-4-3p	104724036	104724058	caaaaacugugauuacuuuugca
yes				mml-miR-548a-5	CM002980.3	+	118564586	118564785	aaugacuguccaacuaaauucacaaguucugcccacacucaugguggggggguggcaguauuauauuagguuggugcaaaaguaauugugguuuuugucauuaaacguaaugggaaaaaacacaauuauuuuugcaucaaccuauacaagguaugcacaccaggggaugggagucuugggaaccacuuuagaauucugcc	200	mml-miR-548a-5-5p	118564662	118564682	caaaaguaauugugguuuuug	mml-miR-548a-5-3p	118564702	118564721	aaaacacaauuauuuuugca
yes		yes	ENSMMUT00000068670	mml-miR-548a-6	CM002980.3	+	188599785	188599935	acaugugcagccagaggaccagccagaagaugcuuacuacuagguuggugcaaaaguaauugugguuuuugcauuuaaaguaauggccaaaaccgcgauuacucuugcacgaaccuaacgguaacacuucuucccaccuccuuaugaauaa	151	mml-miR-548a-6-5p	188599835	188599855	caaaaguaauugugguuuuug	mml-miR-548a-6-3p	188599874	188599893	aaaccgcgauuacucuugca
yes				mml-miR-548a-8	CM002984.2	-	136352767	136352916	ugcuauaauuacaauacuauuuucacuguuuuacuagguuggugcaaaaguaauugugguuuuugucguuacuuuuaaaaaugucaaaaaccgcaauuacuuuuacacacaaaucucaucuagucaggagguugaggugggaggauagcu	150	mml-miR-548a-8-5p	136352812	136352833	aaaaguaauugugguuuuuguc	mml-miR-548a-8-3p	136352851	136352872	caaaaaccgcaauuacuuuuac
yes				mml-miR-548a-9	CM002984.2	+	179080638	179080788	ggaggggagagcagugcaggaagaggcacguauuauuagauuggugcaaaaguaauugugguuuuugcaauuaugcuuaguggcaaaacccgcaguuacuuuugcaccagccuaacagcuugaaguggcuguuucuuguaggucagaugua	151	mml-miR-548a-9-5p	179080684	179080704	caaaaguaauugugguuuuug	mml-miR-548a-9-3p	179080721	179080742	caaaacccgcaguuacuuuugc
yes				mml-miR-548a-11	CM002983.2	+	69600475	69600575	uaaaaccacaaugagauauuagguuguugcaaaaguaauugugguuuuugccaucacuuuuaacgcaaaacugcaauuacuuuugcaccaaucuaauacca	101	mml-miR-548a-11-5p	69600505	69600525	aaaaguaauugugguuuuugc	mml-miR-548a-11-3p	69600541	69600560	aaaacugcaauuacuuuugc
yes		yes	ENSMMUT00000077610	mml-miR-548a-12	CM002983.2	+	98824745	98824895	uauguuuaagguauaaagaacucuuguaaguaucauauauguauuauguuggugcaaaaguaauugugguuuuugccauuacuuuucauggcaaaacugcaauuacuuuugcacaaaucuaauauguuuauguggauauauacagauaccc	151	mml-miR-548a-12-5p	98824799	98824819	caaaaguaauugugguuuuug	mml-miR-548a-12-3p	98824838	98824857	aaacugcaauuacuuuugca
yes				mml-miR-548a-13	CM002981.2	-	42374819	42374969	ucuacuuaaaacuuguuaaauaugaaaacuauuagguuggugcaaaaguaauugugguuuuugcagguuuuguuuuuuguuuucuuuuuuuuuuaaauggcaaaaaucucaauuacuuuugcaccaaucuaauauuuagaucuguguugaa	151	mml-miR-548a-13-5p	42374861	42374881	caaaaguaauugugguuuuug	mml-miR-548a-13-3p	42374921	42374941	aaaaucucaauuacuuuugca
yes				mml-miR-548a-15	CM002981.2	-	135437150	135437250	agccauuaguuuggugcaaaaguaauugugguuuuugccauuuuaaguaaugcccagaaccgcaauuacuuuugcaucaagguauaauaauucccauggca	101	mml-miR-548a-15-5p	135437166	135437186	caaaaguaauugugguuuuug	mml-miR-548a-15-3p	135437206	135437225	gaaccgcaauuacuuuugca
yes				mml-miR-548a-16	CM002981.2	-	143120837	143120991	guagagguacugccuugagguuuuagguaagagcccaaagaauucuaugaauuauuaggcuggugcaaaaguaauugugguuuuugccauugaaaguaauggcaaaaucugcaauuauuuuugcaccaaccuuaccuuucuccaaacaaauagag	155	mml-miR-548a-16-5p	143120902	143120922	caaaaguaauugugguuuuug	mml-miR-548a-16-3p	143120941	143120961	aaaucugcaauuauuuuugca
yes		yes	ENSMMUT00000049358	mml-miR-548a-17	CM002982.3	-	4163195	4163395	aaacucuaacccuuagcaauguucccaauuauagaagacccucaacuugggacaaugaaaaaaguacaaguauuaaguugcugcaaaaguaauugugguuuuugccauuacuugcaauggcaaaaaaucacaauuucuuuugcagcaacuuaauauuuuguuaauuguugaggucugcugucucuuugucaggguugcugu	201	mml-miR-548a-17-5p	4163278	4163298	caaaaguaauugugguuuuug	mml-miR-548a-17-3p	4163318	4163338	aaaaucacaauuucuuuugca
yes				mml-miR-548a-18	CM002982.3	-	68320728	68320928	cauuacauuucucugaaccucacuucccucacccaucacauaggcaucccauuagguuggugcaaaaguaauugugguuuuugccauuacuuuucacgucaaaaccgcaaucauuuuugcaccaaccuaauaauaccuucuacaacgcacugugaggguuaaauaaaguagugcuggcagaaagaaaacuaagaaacauag	201	mml-miR-548a-18-5p	68320791	68320811	aaaaguaauugugguuuuugc	mml-miR-548a-18-3p	68320828	68320847	aaaaccgcaaucauuuuugc
yes				mml-miR-548a-19	CM002982.3	+	90160214	90160362	uuuguauucagauuuuucaccauauuauaagcguuucuucuucauuguauuuagguugaugcaaaaguaauugugguuuuuacauugaaaguaaauggcaaaaaccgcaauuacuuuugcaccaaccuaauggaaaccauuuuuuaaga	149	mml-miR-548a-19-5p	90160277	90160297	aaaguaauugugguuuuuaca	mml-miR-548a-19-3p	90160312	90160332	caaaaaccgcaauuacuuuug
yes				mml-miR-548a-20	CM002991.3	-	36995897	36995995	aaagaacaaacccuuuaauuauuagguugguacaaaaguaauugugguuuuuugcuauuaaaaauaauggcaguuacuuuugcaccaaccugaauaaga	99	mml-miR-548a-20-5p	36995930	36995952	aaaaguaauugugguuuuuugcu	mml-miR-548a-20-3p	36995957	36995977	aaaauaauggcaguuacuuuu
yes		yes	ENSMMUT00000076218	mml-miR-548a-21	CM002985.3	+	31672540	31672690	uaacacuucuuuuaucauugauucucuaaaguuuuuaaggcauacuaauagguuuguucaaaaguaauugugguuuuugcuguuacuuuuaauugcaaaaaccgcaauuacuuuugcaccaaccaaauaucauugccaguagcaauaauuu	151	mml-miR-548a-21-5p	31672598	31672618	caaaaguaauugugguuuuug	mml-miR-548a-21-3p	31672637	31672660	aaaaccgcaauuacuuuugcacca
yes				mml-miR-548a-23	CM002985.3	-	109888846	109888945	aaugcaacaguauucaguuggugcaaaguaauugugguuuuugccauugaaaaguaauggaaaaacugcaauuacuuuugcaccuaccuaauaccucaca	100	mml-miR-548a-23-5p	109888871	109888890	aaguaauugugguuuuugcc	mml-miR-548a-23-3p	109888906	109888925	aaaaacugcaauuacuuuug
yes				mml-miR-548a-24	CM002987.3	-	28901659	28901809	uuauucaugcuguaguguacuaugcuaguguaaaaguaauugugguuuuugccauugaaaguaauggcaaauuaauugugguuuucaccauugaaaguaauggcaaaaccgcaauuacuuuugcgccaaccucguaccuugcuauguuugc	151	mml-miR-548a-24-5p	28901690	28901710	aaaaguaauugugguuuuugc	mml-miR-548a-24-3p	28901761	28901781	gcaaaaccgcaauuacuuuug
yes				mml-miR-548a-25	CM002987.3	-	114677573	114677773	auccucccccuccccacuucaguaaaccuucagugcuugaagaucagguauuauuaaguuggugcaaaaguaauugugguuuuugccauugaaaauaaugacagaaaccuccguuacuuuugcaccaaccaaauaaucuuuauaccagggcuugaucucacuuugcuuuugguauggaaguagaacaaugucuagaaaaau	201	mml-miR-548a-25-5p	114677637	114677657	caaaaguaauugugguuuuug	mml-miR-548a-25-3p	114677676	114677696	gaaaccuccguuacuuuugca
yes				mml-miR-548a-26	CM002992.3	-	51501098	51501198	cauuuacccuacuuguguaagauuggugcaaaaguaauugugguuuuugcuauugaaaguaauggcaaaacuguaauuacuuuugcaccagccuauauagu	101	mml-miR-548a-26-5p	51501126	51501148	caaaaguaauugugguuuuugcu	mml-miR-548a-26-3p	51501163	51501184	caaaacuguaauuacuuuugca
yes				mml-miR-548a-27	CM002989.3	+	35549808	35549958	uucuuauugaaauaucaucauucuaacaacacauauuagguuggagcaaaaaguaauugugguuuuugcaguaaagugcgguuuugcaauggcaaaaaccgcaauuacuuuugcaccacccuuaauaaaaaugauuacuauaucuuuauau	151	mml-miR-548a-27-5p	35549856	35549876	aaaaguaauugugguuuuugc	mml-miR-548a-27-3p	35549900	35549920	caaaaaccgcaauuacuuuug
yes				mml-miR-548a-28	CM002989.3	+	83840433	83840633	caccugaaguaagucugauggaagaggucuggggcggagcuagagaauuugcuauuuuauuugguuggugaaaaaguaauugugguuuuugccacugaacauaaugccaaaaacccacaauuacuuuugugauaauguaauaguggaaauguuucaaguaccaggaaaacauuuuuaguagcacucucuaggugaauuuau	201	mml-miR-548a-28-5p	83840504	83840524	aaaaguaauugugguuuuugc	mml-miR-548a-28-3p	83840542	83840563	aaaacccacaauuacuuuugug
yes		yes	ENSMMUT00000049383	mml-miR-548a-29	CM002989.3	-	111859011	111859211	aucauccggcaguuaacuucgggagaaaauuuuuaaaugacuugaauugacaucuguaauaggaaauauucgugcaaaaguaauugugguuuuugccauuuaaaaguaauggcaaaaacugcaaucauuuuugcaccaaccuauauagaagaugcccgggauucauucauuuccuccaguaagaauuucucucugccaggc	201	mml-miR-548a-29-5p	111859085	111859105	caaaaguaauugugguuuuug	mml-miR-548a-29-3p	111859125	111859145	aaaacugcaaucauuuuugca
yes		yes	ENSMMUT00000049632	mml-miR-548a-30	CM002979.2	+	29420182	29420282	acuauuuaggcuggugaaaaaguaauugugguuuuugccauggaaaguaaugaccaaaacuguaauuacuuuugcaccaacauguaauauuucuggguaga	101	mml-miR-548a-30-5p	29420199	29420220	aaaaguaauugugguuuuugcc	mml-miR-548a-30-3p	29420236	29420257	caaaacuguaauuacuuuugca
yes				mml-miR-548a-31	CM002979.2	+	83396926	83397026	gucucucuuaaaccauguauuauguuggcgcaaaaguaauugugguuuuugccauugaaaguaauggcaaaaccauaauuacuuuugcaccaaccuauauc	101	mml-miR-548a-31-5p	83396956	83396976	caaaaguaauugugguuuuug	mml-miR-548a-31-3p	83396995	83397015	aaaccauaauuacuuuugcac
yes				mml-miR-548a-32	CM002988.2	-	46322537	46322637	aauauagaacuugaaaccauuagauuggugcaaaaguaauugugguuuuugccguuacucuuaauugugaaaacugcaauuacuuuugcaccaacuuaaua	101	mml-miR-548a-32-5p	46322567	46322587	caaaaguaauugugguuuuug	mml-miR-548a-32-3p	46322606	46322624	aaaacugcaauuacuuuug
yes				mml-miR-548a-33	CM002988.2	-	52444964	52445114	aaagauuaucuuuucuccauugcucugauguauuaggcuggugcaaaaguaauugugguuuuugccauggcaaaaccauuaauggccaaaacugcaauuacuuuugcaccaacuuaauauguccuuugucauaaaucaagcuucucuauau	151	mml-miR-548a-33-5p	52445007	52445027	caaaaguaauugugguuuuug	mml-miR-548a-33-3p	52445052	52445071	aaacugcaauuacuuuugca
yes				mml-miR-548a-34	CM002988.2	+	108006995	108007194	ccgggauccuugaggaugaugaaaauacuaacauucacggaauggguacaaggaguguuuuauuagguugguucaaaaguaauugugguuuuugucauuuaaaaaaaguaagggcaaaaaccgaaacuacuuuugcaucuaauacaucgcuaacacuuucgucucguccagggauguuuguggggaguggcuggggcuca	200	mml-miR-548a-34-5p	108007068	108007088	caaaaguaauugugguuuuug	mml-miR-548a-34-3p	108007111	108007134	aaaaccgaaacuacuuuugcaucu
yes				mml-miR-548a-35	CM002986.2	+	77139263	77139363	cuacacucaguuaagguuggugaaaaaguaauugugguuuuugccauuacuuuuaacagcaaaaaccgcaauaacuuuugcaccaaccuaauauuugcugu	101	mml-miR-548a-35-5p	77139286	77139306	aaaaguaauugugguuuuugc	mml-miR-548a-35-3p	77139323	77139344	aaaaaccgcaauaacuuuugca
yes		yes	ENSMMUT00000064179	mml-miR-548a-36	CM002994.2	+	46883438	46883637	caaucacauuuuagucuuugccucuuaauuugcuugguccugaccuuuuccuuuacaacuaagucuguucuauuagguuggugcaaaaaguaauugugguuuuuggcauuacuuucaauggcaaaagcugcaauuacuuuugcaccaaucuaauagaucugaaguugaagguucaaguguaggccuucuuauugaucaca	200	mml-miR-548a-36-5p	46883523	46883542	aaaaguaauugugguuuuug	mml-miR-548a-36-3p	46883561	46883579	aaagcugcaauuacuuuug
yes				mml-miR-548a-37	CM002995.2	+	25828600	25828748	gaaaacauucaaacuccucucuucuaauuauuuugaaauagauuagguuagugcaaaaguaauugugguuuuuuccuauuaaauguaaugguaaaaacugcaauuacuuuugcaucaaccuaaugcaaugcaguauuguuaaccauagu	149	mml-miR-548a-37-5p	25828655	25828676	aaaguaauugugguuuuuuccu	mml-miR-548a-37-3p	25828692	25828711	aaaaacugcaauuacuuuug
yes				mml-miR-548a-38	CM002995.2	-	50125184	50125384	uagaaccaaguaugccauccuaccuauuuguauauggugucuccucuaguuauuagguuggugcaaaaguaauugugguuuuugccacuuuuuaaugguaaaaaccaauaaaaauaguagcaaaaacggaaauuucuuuuucaucaacccaauacaacagauggguuguaccuuacuccagauaggaugagccuaucugga	201	mml-miR-548a-38-5p	50125247	50125267	caaaaguaauugugguuuuug	mml-miR-548a-38-3p	50125306	50125326	aaaacggaaauuucuuuuuca
yes		yes	ENSMMUT00000049573	mml-miR-548a-39	CM002993.2	-	7958106	7958205	ccaaaggaaucuauuugguucaugcaaaaguaauugugguuuuugucauuaccuucaagggcaaaaaccucaauuacuuuugcaacaaccuaauacaagc	100	mml-miR-548a-39-5p	7958130	7958150	caaaaguaauugugguuuuug	mml-miR-548a-39-3p	7958169	7958189	aaaaccucaauuacuuuugca
yes				mml-miR-548a-40	CM002993.2	+	47057694	47057844	aaaauaaaaauuaauacaagugaaaauauguauaaacacuauuagguugguguaaaaguaauugugguuuuugcuacuaaaguaacagcaaaaaccgcaauuacuuaugcagcaaacuaaaauauauagcauuuacauuuuuaauugguuc	151	mml-miR-548a-40-5p	47057747	47057767	aaaaguaauugugguuuuugc	mml-miR-548a-40-3p	47057783	47057803	aaaaaccgcaauuacuuaugc
yes				mml-miR-548a-41	CM002997.3	-	88279951	88280101	uguuagaaauuaauguauguuauaagguugguacaaaaguaauugugguuuuugccacuuuuaauggcaaaauccgcaauuacuuuugcaccaacccaaauaccuuagcuuucaaaauauaucacauuuuucuuucucacuuauaugaucu	151	mml-miR-548a-41-5p	88279984	88280004	caaaaguaauugugguuuuug	mml-miR-548a-41-3p	88280020	88280041	aaauccgcaauuacuuuugcac
yes				mml-miR-548a-42	CM002997.3	+	114971258	114971408	aggaguccgaacacuauuugaaaauuuucuauuagguugaugcaaaaguaauugugguuuuugccauugaaaguaauagcaaaaaccgcaguuacuuuugcaccaaccuaauaauauagaaaccuggaaauucucaugauacuuucacugu	151	mml-miR-548a-42-5p	114971301	114971322	aaaaguaauugugguuuuugcc	mml-miR-548a-42-3p	114971337	114971357	caaaaaccgcaguuacuuuug
		yes	ENSMMUT00000049829	mml-miR-548a-43	CM002986.2	+	42284226	42284354	cccauuuaaauuugaauuucauauaaacagaguaauuuucaguauuaguguaucacgugcagcauuugggacauacuuaugcuaaaaaaauuaggugguguugaucugaaauuccaguguagaugggca	129	mml-miR-548a-43-5p	42284255	42284272	gaguaauuuucaguauua	mml-miR-548a-43-3p	42284307	42284324	cuaaaaaaauuagguggu
yes				mml-miR-548ae-1	CM002984.2	-	121089430	121089628	uaaggacacuagucaggguuuuauauuuggcuauacuauuaggucggugcaaaaguaauugcgauuuuugccauuacuuuuaacggcaaacuuuuaauggcaaaguuacuggcauuaacuuuuaauggcaaaaacugcaauuacuuuugcacaaaucuaauacaaaaggguacugcauuucauauaaucugaaaauuua	199	mml-miR-548ae-1-5p	121089480	121089500	aaaaguaauugcgauuuuugc	mml-miR-548ae-1-3p	121089558	121089578	caaaaacugcaauuacuuuug
yes				mml-miR-548ae-2	CM002983.2	+	130419016	130419165	cacacucaguccaccccacauaacccagaacagcaaaggauuuaaguuggugcaaaaguaguugcgguuuuugcauugaaaguaauagcaaaaacugcaauuacuuucgcaccaagcaaacauugucugacuauguuggguuuuagugua	150	mml-miR-548ae-2-5p	130419072	130419089	aguaguugcgguuuuugc	mml-miR-548ae-2-3p	130419104	130419122	caaaaacugcaauuacuuu
yes				mml-miR-548ae-3	CM002981.2	-	54671748	54671933	guguguucucugcauuuaaguuggugcaaaaguaauuguaguuuuugccauuaagaaauggcauauaagguauagcaaugacuauaagguaaugaauauaagguauaacauuaaacaaugacaaaaacugcaauuacuuuuccaccaguguaauaccauuacacauacaaugaccuuucuacuuuc	186	mml-miR-548ae-3-5p	54671777	54671797	aaguaauuguaguuuuugcca	mml-miR-548ae-3-3p	54671869	54671888	caaaaacugcaauuacuuuu
yes				mml-miR-548ae-4	CM002981.2	+	94551494	94551642	cuuuuugccauuacuuucaaugcaaaguuaaugccauuagauaagcgaaaaaguaauugcaguuuuugccauuacuuucaaaggcaaaaacugcaauuacuuuugcaacaaucuaauagcacugacuuucucuaguauuuuaacauuau	149	mml-miR-548ae-4-5p	94551544	94551563	aaguaauugcaguuuuugcc	mml-miR-548ae-4-3p	94551578	94551598	caaaaacugcaauuacuuuug
yes				mml-miR-548ae-5	CM002981.2	-	94551498	94551646	uggaauaauguuaaaauacuagagaaagucagugcuauuagauuguugcaaaaguaauugcaguuuuugccuuugaaaguaauggcaaaaacugcaauuacuuuuucgcuuaucuaauggcauuaacuuugcauugaaaguaauggcaa	149	mml-miR-548ae-5-5p	94551549	94551568	aaguaauugcaguuuuugcc	mml-miR-548ae-5-3p	94551583	94551602	caaaaacugcaauuacuuuu
yes				mml-miR-548ae-6	CM002991.3	-	24970653	24970851	accuugucuuuaauaucauacagcuagggggaguaaguacaauggcuauagaaaaaacauauauauuuagguuggcgcaaaaguaauugugguuucgcuaguacuuuuaaauggcaaaaacugcaauuacuuuugugccaaccuaauaguucaugauagcaacagaagaaauaucccuaauggucaguccugacauggc	199	mml-miR-548ae-6-5p	24970732	24970751	aaaguaauugugguuucgcu	mml-miR-548ae-6-3p	24970767	24970787	caaaaacugcaauuacuuuug
yes				mml-miR-548ae-7	CM002978.2	-	43521478	43521676	gccuuagccacauccugcauucucucugggccucaguuucuucauuugcaaguggugauauuagguugauacaaaaguaauugugguuuuugcccauuaaaguaguggcaaaaacugcaauuacuuuugcaucaaccuauauaucuauauaggugccucuaucaacugauggcagaaucagauggcuuugcagauucug	199	mml-miR-548ae-7-5p	43521550	43521571	aaaaguaauugugguuuuugcc	mml-miR-548ae-7-3p	43521586	43521606	caaaaacugcaauuacuuuug
yes				mml-miR-548ae-8	CM002988.2	-	69062412	69062610	guccucaauacuuuuuaaauauguaaaggggucaugagaccaaaaaauucgagaacuucuauuaggucguugcaaacguaauugaggcuuuugucauugaaaguauggcaaaaacugcaauuacuuuugcaccaaucuaaaaguuaaaguugaauaugagcaugaccuauauucuaacaauuacacuccuaaguauaua	199	mml-miR-548ae-8-5p	69062486	69062506	aacguaauugaggcuuuuguc	mml-miR-548ae-8-3p	69062520	69062540	caaaaacugcaauuacuuuug
yes		yes	ENSMMUT00000076828	mml-miR-548ae-9	CM002994.2	-	15280767	15280866	uccauguagcuauuuaauuggugcaaaaguaauugcgcuuuuugccauuaaaaguaaugacaaaaacugcaauuacuuucgugccaaccuaauaauggau	100	mml-miR-548ae-9-5p	15280795	15280813	guaauugcgcuuuuugcca	mml-miR-548ae-9-3p	15280827	15280844	caaaaacugcaauuacuu
yes				mml-miR-548ae-10	CM002993.2	-	12748538	12748680	uaguauuuagguuggugcaaaaguaauugugauuuuuugccauuacuuucaauggcaaaaacugcaauuacuuuugcaccagccuaauauaaaggguuuuaaaccaaauguaagacucccucccucucuccuucuguuuccug	143	mml-miR-548ae-10-5p	12748557	12748578	aaaguaauugugauuuuuugcc	mml-miR-548ae-10-3p	12748593	12748613	caaaaacugcaauuacuuuug
yes				mml-miR-548ae-11	CM002993.2	-	61903000	61903148	ugacuguauucaaauauucauuagguuggugcaaaaguaauugcaguuuuugccauuaaaaauuuuuaauggcauuuuuuuaaauuuuaaauugcaaaaacugcaauuacuuuuuuaccaacacgauacuauaggcauagauacuuacu	149	mml-miR-548ae-11-5p	61903031	61903053	caaaaguaauugcaguuuuugcc	mml-miR-548ae-11-3p	61903094	61903113	caaaaacugcaauuacuuuu
yes				mml-miR-548ae-12	CM002997.3	+	27129248	27129446	caguuuuauaaaaacccaagaucaauauuuaugccuagucaccaaaagguaguaauaagauuguucguaguauuagguugaugcaaaugugguuguggcuuuugccauuacuuuuaaugcaaaaacugcaauuacuuuugcaccaacauaaugguaugguuuauucacuccucuguuaucuacuggacagcaauuccuc	199	mml-miR-548ae-12-5p	27129333	27129354	aaugugguuguggcuuuugcca	mml-miR-548ae-12-3p	27129367	27129387	caaaaacugcaauuacuuuug
yes				mml-miR-548ah-1	CM002983.2	-	78013002	78013103	auaugaguuaguaguaaguuggcacagaaguaauugugguuuuccccauuaaaaguaauggcaaaaacugcaguuacuuuugcaccaaccuaauauuuauac	102	mml-miR-548ah-1-5p	78013028	78013048	gaaguaauugugguuuucccc	mml-miR-548ah-1-3p	78013064	78013083	aaaaacugcaguuacuuuug
yes				mml-miR-548ah-2	CM002985.3	-	135878223	135878424	aucauuuauuuugugaagcaucucgagaguuaagucuagcagauaucguuauuccauuuuauuuuugauuagugcaaaagaaauugcacuuuuuguucuuaaagauaauggcaaaaacugcaguuacuuuugcaccaaccuaauagaagaguagcuaaaguccagaggacuuuaaagagcuuucaaaguuguacaggugaua	202	mml-miR-548ah-2-5p	135878299	135878318	aaagaaauugcacuuuuugu	mml-miR-548ah-2-3p	135878335	135878354	aaaaacugcaguuacuuuug
yes				mml-miR-548ah-3	CM002988.2	+	107693313	107693414	gagacauuuauuagguuguuuggugcaaaaguaauugggguuuuuugguauuaaaaguaauggcaaaaacugcaguuacuuuugcaccaaccuaauagcucu	102	mml-miR-548ah-3-5p	107693340	107693361	aaaguaauugggguuuuuuggu	mml-miR-548ah-3-3p	107693377	107693396	aaaaacugcaguuacuuuug
yes				mml-miR-548ah-4	CM002997.3	+	2239457	2239558	agcuguuacuagguaggugcaaaaguaauugcggcuuuuucuguuacuuuuaaugucaaaaacugcaguuacuuuugcaucaaccuaauauggguagaugca	102	mml-miR-548ah-4-5p	2239478	2239499	aaaguaauugcggcuuuuucug	mml-miR-548ah-4-3p	2239514	2239533	aaaaacugcaguuacuuuug
yes				mml-miR-548aj-1	CM002977.3	+	194922193	194922291	caaaugcagauauuagguuggugcaaaaguaauugugguuuucccauugaaaguaauggcaaaaacugcaauuacuuuuucaccaaccuaauauuaaua	99	mml-miR-548aj-1-5p	194922219	194922237	aaguaauugugguuuuccc	mml-miR-548aj-1-3p	194922252	194922271	caaaaacugcaauuacuuuu
yes				mml-miR-548aj-2	JSUE03154285.1	-	680	779	gggcuugcuucaguuauaggucagugcaaaagucauugcaguuuuugcaauuuuaaugguaaaaacugcaauuacuuuugcaccaaccuaauaauaaaga	100	mml-miR-548aj-2-5p	708	727	aaagucauugcaguuuuugc	mml-miR-548aj-2-3p	740	759	aaaaacugcaauuacuuuug
yes		yes	ENSMMUT00000066035	mml-miR-548aj-3	CM002980.3	+	114033957	114034055	augauccacaucguauuagguuggugcaaaaguaauuccaguuuuugccguuacuuuuaauggagaaaaacugcaauuacuuuugcaucaaccuaauag	99	mml-miR-548aj-3-5p	114033985	114034005	aaaguaauuccaguuuuugcc	mml-miR-548aj-3-3p	114034022	114034041	aaaaacugcaauuacuuuug
yes				mml-miR-548aj-4	CM002980.3	+	145496624	145496772	uuauauguauuauauaugagugaucgucugacuauauuaaguugauacaaaaguaauugcgguauuugccauuaaaaguaaugccaaaaacugcaauuacuuuugcaccaaccuaauagacguuaucaagaacauuguagcaaauuuug	149	mml-miR-548aj-4-5p	145496673	145496694	aaaguaauugcgguauuugcca	mml-miR-548aj-4-3p	145496708	145496728	caaaaacugcaauuacuuuug
yes		yes	ENSMMUT00000049463	mml-miR-548aj-5	CM002983.2	+	66658273	66658421	augcguaaacauaugacuuuuaaauauuagguuggugcaaaaguaauugcuauuuuugccauuacuuuuaauagcaaaaacugcaauuacuuuugcauccaccuaauauuuaaucacuuuaaaauaauaguuuaauaaaaauaauaaca	149	mml-miR-548aj-5-5p	66658312	66658333	aaaguaauugcuauuuuugcca	mml-miR-548aj-5-3p	66658347	66658367	caaaaacugcaauuacuuuug
yes				mml-miR-548aj-6	CM002983.2	+	105801512	105801610	uugcaucuauuagguuggugcaaaagucauuguggguuuucacuauuaaaaggaauagcaaaaacugcaauuacuuuugcaucacccuaauagaaggcc	99	mml-miR-548aj-6-5p	105801534	105801555	aaagucauuguggguuuucacu	mml-miR-548aj-6-3p	105801570	105801590	caaaaacugcaauuacuuuug
yes				mml-miR-548aj-7	CM002983.2	-	123405875	123405973	aaacagauauauucaguugguacaaaaguaauugugauuuuugccauuacuuuuaguggcaaaaaacugcaauuacuuuugcacaaaacuaguauuugg	99	mml-miR-548aj-7-5p	123405899	123405917	aaaguaauugugauuuuug	mml-miR-548aj-7-3p	123405936	123405955	aaaaacugcaauuacuuuug
yes				mml-miR-548aj-8	CM002983.2	+	150674611	150674759	agaaaagauaccugaauuuauuaguuuggugcaaaaguaauugcgguuuucuauuaaaaugaauggaaaaacugcaauuacuuuugcaccaaccuaauaauaagcucccacaaauacauaagaaaagaacacuaaaauggacaaagaau	149	mml-miR-548aj-8-5p	150674644	150674662	aaaguacuugcgguuuucu	mml-miR-548aj-8-3p	150674677	150674696	aaaaacugcaauuacuuuug
yes				mml-miR-548aj-9	CM002982.3	-	226781	226879	gaacaaauuuaucauauuaaguuggugcaaaaguaauguggcuuuuaccauugaaaguaauggcaaaaacugcaauuacuuuugcaccaaccuaauauu	99	mml-miR-548aj-9-5p	226810	226829	aaaguaauguggcuuuuacc	mml-miR-548aj-9-3p	226844	226864	caaaaacugcaauuacuuuug
yes		yes	ENSMMUT00000053399	mml-miR-548aj-10	CM002985.3	-	30022621	30022769	aauucuaccuaacaggggcauugagucaagguauuagguugcugcaaaaguaauugugguuuuugccacugaggcaauggcaaaaacugcaauuacuuuugcaccaacguuaauagaaggaaggggcgauaaaccaggucuuuagagau	149	mml-miR-548aj-10-5p	30022666	30022687	aaaaguaauugugguuuuugcc	mml-miR-548aj-10-3p	30022701	30022721	caaaaacugcaauuacuuuug
yes				mml-miR-548aj-11	CM002985.3	+	101177842	101177990	cacaguuuguagugccccaaaacaauuauuuagguuggugaaaaaauaauugcaguucuugcuauuacuuuuaaugucaaaaacugcaauuacuuuugcaccaaccuaauacaauuguaacauuaaagaucacugaucccaaaucacca	149	mml-miR-548aj-11-5p	101177885	101177905	aaauaauugcaguucuugcua	mml-miR-548aj-11-3p	101177919	101177939	caaaaacugcaauuacuuuug
yes				mml-miR-548aj-12	CM002985.3	-	106129973	106130121	uaaagcuccaaaagucaugauucuaguaaucuauuaguuuggugcaaaaguaacugugguuuuaaccauugaaaguaauggcaaaaacugcaauuacuuuugcaccaaccuaaauaugaaguuauuguugaaacguaauugcauuugug	149	mml-miR-548aj-12-5p	106130018	106130035	aaaaguaacugugguuuu	mml-miR-548aj-12-3p	106130054	106130074	caaaaacugcaauuacuuuug
yes				mml-miR-548aj-14	KQ732613.1	+	235960	236109	cagaaacugaaaggagaaauaguccuaauccuaauauuaggcuagugcaaaaguaauugcgguuuuugccauuaaaaguaauagcaaaaacugcaauuacuuuugcaccaaccuuaguauuucaaaacuaugaacccagauguuagaggc	150	mml-miR-548aj-14-5p	236008	236028	aaaaguaauugcgguuuuugc	mml-miR-548aj-14-3p	236044	236064	caaaaacugcaauuacuuuug
yes				mml-miR-548aj-16	CM002989.3	+	57161897	57162045	uuugauaagaaagaucuuacugaauguaaauauuuaugguuuuagguuggugcuaaaguaauugugguuuuuaccauugaaaguaauggcaaaaacugcaauuacuuuugcaccaaccucauaauucacuaggaaugggaauauagaag	149	mml-miR-548aj-16-5p	57161952	57161971	aaguaauugugguuuuuacc	mml-miR-548aj-16-3p	57161986	57162006	caaaaacugcaauuacuuuug
yes		yes	ENSMMUT00000071798	mml-miR-548aj-17	CM002989.3	-	81212430	81212578	auugucaaaugcaauauuggacuauuauuagauuggugcaaaaguaacugugguuuucaccauuaguuuaauggcaaaaguuaaauaauggcaaaaacugcaauuacuuuugcaccaaccugaugcuauuguuaauuauacauuugcau	149	mml-miR-548aj-17-5p	81212470	81212490	aaaguaacugugguuuucacc	mml-miR-548aj-17-3p	81212521	81212541	caaaaacugcaauuacuuuug
yes		yes	ENSMMUT00000068905	mml-miR-548aj-18	CM002989.3	+	99770264	99770362	agaagauacauagauauuagguuggugcaaaaguaauugcaguuuuugugauuacucuuaaugcugaaaacugcaauuacuuuuacaacaaguuaauag	99	mml-miR-548aj-18-5p	99770292	99770311	aaaaguaauugcaguuuuug	mml-miR-548aj-18-3p	99770330	99770350	aaaacugcaauuacuuuuaca
yes				mml-miR-548aj-19	CM002979.2	+	96004609	96004757	uggauaacaaauuaaacuucacccggauacauauuaguuuggugcaaaaguuauugugguuuuugcauuaaaaguaaugggaaaaacugcaauuacuuuugccccaacccccaaauuuuaucccaugaagaaguaaaaacaaaaacaca	149	mml-miR-548aj-19-5p	96004655	96004674	aaaguuauugugguuuuugc	mml-miR-548aj-19-3p	96004690	96004709	aaaaacugcaauuacuuuug
yes		yes	ENSMMUT00000049831	mml-miR-548aj-20	CM002978.2	+	7742944	7743093	agcauccauaaguuaccucuaaguaaacuguaguacuauuagguuggugcaaaaguaaucgugguuuuugucauuacuuuuuuuagaaaacaaaacgguaaaaacugcaauuacuuuugcaccaaccuaauagaaucguagaguuaggga	150	mml-miR-548aj-20-5p	7742993	7743014	caaaaguaaucgugguuuuugu	mml-miR-548aj-20-3p	7743045	7743064	aaacugcaauuacuuuugca
yes				mml-miR-548aj-21	CM002978.2	-	13444648	13444746	aaagccaauaauuauuuauuauacguuggugcaaaaguaauugugguuuuaccauucauggcaaaaacugcaauuacuuuuccauuggucugauaauau	99	mml-miR-548aj-21-5p	13444682	13444700	aaguaauugugguuuuacc	mml-miR-548aj-21-3p	13444709	13444728	caaaaacugcaauuacuuuu
yes				mml-miR-548aj-22	CM002978.2	+	41341922	41342020	aaauaucuauguuccuuaauauauuggugcaaaaguaacugugguucuuucuauuaaagguaauggcaaaaacugcaauuacuuuugcaccaaccuaua	99	mml-miR-548aj-22-5p	41341953	41341973	aaaguaacugugguucuuucu	mml-miR-548aj-22-3p	41341988	41342008	caaaaacugcaauuacuuuug
yes				mml-miR-548aj-23	CM002978.2	+	79725036	79725135	uuugcuuauuagguugguuggugcaaaaguuauugaggauuuucucauuaccuuuaauggcaaaaacugcaauuacuuuuacaccaaccuauauaaagcc	100	mml-miR-548aj-23-5p	79725062	79725081	aaguuauugaggauuuucuc	mml-miR-548aj-23-3p	79725096	79725115	caaaaacugcaauuacuuuu
yes				mml-miR-548aj-24	CM002988.2	+	46685665	46685813	auccaaucagaguuguggugauaauuauuagguuugugcaaaagcaauugcaguaauaguuuuugucauuaccauuaaaaguaauggcaaaaacugcaauuacuuuugcaccaaccuaauaaaugagacaugcuuuugaaucauauagc	149	mml-miR-548aj-24-5p	46685705	46685731	aaagcaauugcaguaauaguuuuuguc	mml-miR-548aj-24-3p	46685752	46685772	caaaaacugcaauuacuuuug
yes				mml-miR-548aj-25	CM002988.2	-	109320037	109320121	guaacauuacuguuagguuggugcaaaaguaauuacgguuuugcauuaauggcaaaaaacugcaauuacuuuugcaccaaccuaa	85	mml-miR-548aj-25-5p	109320062	109320079	aaaguaauuacgguuuug	mml-miR-548aj-25-3p	109320091	109320110	aaaaacugcaauuacuuuug
yes		yes	ENSMMUT00000065326	mml-miR-548aj-26	CM002986.2	+	19481005	19481103	aauuaauccugaagacauauuagguuggugcaaaguuaauugugguuuugaccaauacuuuuaauggcaaaaacugcaauuacuuuuguacuaaccuac	99	mml-miR-548aj-26-5p	19481037	19481057	aaguuaauugugguuuugacc	mml-miR-548aj-26-3p	19481072	19481092	caaaaacugcaauuacuuuug
yes		yes	ENSMMUT00000049695	mml-miR-548aj-27	CM002990.2	+	15010845	15010993	uauauuuuugaaaaauaaaucuguagucugauaaguuaagauguauuagguuggugcaaaagaauugcaguuuuucccauuacuuuucauggcaaaaacugcaauuacuuuugcaucauccuaauauauuguaagcccuggagcaaucg	149	mml-miR-548aj-27-5p	15010903	15010922	aaagaauugcaguuuuuccc	mml-miR-548aj-27-3p	15010937	15010957	caaaaacugcaauuacuuuug
yes				mml-miR-548aj-28	NC_007874.1	+	27375922	27376020	ggggacaggauaaaugagaaguauuuuggugcaaaaguaauugcgguucuugccauuacuuuuaauggaaaaaaaaacugcaauuacuuuuccaucaac	99	mml-miR-548aj-28-5p	27375954	27375975	aaaaguaauugcgguucuugcc	mml-miR-548aj-28-3p	27375994	27376015	aaaaacugcaauuacuuuucca
yes				mml-miR-548aj-29	CM002993.2	-	11084057	11084205	uuuucuuacagaaaggugcacauacuagguuggcacaaaaguaacugcgguuuuugccauuaaaagcaauucaaaaacugcaauuacuuuugugccaaccuaauacaaugacaccaauaaagcagagaucuaucauuaacaggcaaggg	149	mml-miR-548aj-29-5p	11084094	11084116	aaaguaacugcgguuuuugccau	mml-miR-548aj-29-3p	11084128	11084148	caaaaacugcaauuacuuuug
yes				mml-miR-548aj-30	CM002993.2	-	13088118	13088267	augacaacuuugggucuucauauuagguuggugcaaaaauaauugcgguuuuugcaauuaauauaauguguuuugcauuaaauguaaugguaaaaacugcaauuacuuuugcaccaaccugauagaaacaggagaauuuuaaaauccaau	150	mml-miR-548aj-30-5p	13088153	13088172	aaaauaauugcgguuuuugc	mml-miR-548aj-30-3p	13088209	13088228	aaaaacugcaauuacuuuug
yes				mml-miR-548aj-31	CM002997.3	-	29943135	29943276	uuuacucucauuuuagcgacugucaaacuauuacauugguacaaaaguaauugcggcuuuugcaacugaagguaaugguaaaaacugcaauuacuuuugccccaaccuaauagaagucagagugguuaagacagauaauuug	142	mml-miR-548aj-31-5p	29943178	29943197	aaaguaauugcggcuuuugc	mml-miR-548aj-31-3p	29943214	29943233	aaaaacugcaauuacuuuug
yes				mml-miR-548aj-32	CM002997.3	-	81023135	81023233	guaugcuauuagguuggugcuaaaguaauugcacuuuucaaccauuacuuuuaauggcaaaaacugcaauuacuuuuccaccaacccgauagaagaaca	99	mml-miR-548aj-32-5p	81023158	81023177	aguaauugcacuuuucaacc	mml-miR-548aj-32-3p	81023192	81023211	caaaaacugcaauuacuuuu
yes				mml-miR-548aj-33	CM002997.3	+	92654379	92654527	caguucaguaaugcaaguugagauuacuauuagguuggugcaaaaugaauugcgguuuaaauguuuauguucaauggcaaaaacugcaauuacuuuuguaccaagcuuaauaguauuuauaguugauccaugguauaauuucuuuauca	149	mml-miR-548aj-33-5p	92654419	92654443	caaaaugaauugcgguuuaaauguu	mml-miR-548aj-33-3p	92654456	92654476	caaaaacugcaauuacuuuug
yes				mml-miR-548ak-1	NC_007859.1	+	139320914	139321014	cgcucaagcuauuaggcuggugcaaaaguaacugcgguuuuugacuuuuuuuuuuuuuuaaaggcaaaaaccacaauuacuguugcaccaacauaaugaua	101	mml-miR-548ak-1-5p	139320934	139320956	ugcaaaaguaacugcgguuuuug	mml-miR-548ak-1-3p	139320980	139321002	aaaaccacaauuacuguugcacc
yes				mml-miR-548ak-2	CM002982.3	-	85910000	85910150	gcagaacccacaagagugucccacaucagcugagagcauauuagauuggugcaaaaguaacugcgguuuuugacuuuaaaguaaugucaaaaaccgcaauuccuuuugcaccagccuaaugcaacaagccaaugcagaccacuagcauccc	151	mml-miR-548ak-2-5p	85910049	85910071	ugcaaaaguaacugcgguuuuug	mml-miR-548ak-2-3p	85910089	85910111	aaaaccgcaauuccuuuugcacc
yes				mml-miR-548ak-3	CM002991.3	+	38643870	38643969	gcuuagcagaggggacuaugcaaaaguaacugcgguuuuugcuauuacuuuuaaugacaaaacugcaacuacuuuugcaccaaccuaacaauucucuaaa	100	mml-miR-548ak-3-5p	38643891	38643912	aaaaguaacugcgguuuuugcu	mml-miR-548ak-3-3p	38643928	38643947	aaaacugcaacuacuuuugc
yes				mml-miR-548ak-4	NC_007866.1	+	33286738	33286837	gagggaaccacugaucuauuagguuggugcaaaaguaacugcgguuuuugcaaaaaaaaaaaaggcaaaaacugcauuuaguuucacaccaaccugauac	100	mml-miR-548ak-4-5p	33286765	33286787	ugcaaaaguaacugcgguuuuug	mml-miR-548ak-4-3p	33286805	33286827	aaaacugcauuuaguuucacacc
yes				mml-miR-548ak-5	CM002980.3	-	146950864	146950964	agaagggugauauauuagccuggugcaaaaguaacugcgguuuuugccauugaaagguauugaaaacugcaauuacuuuugcaccaaccuaauacaacaug	101	mml-miR-548ak-5-5p	146950887	146950909	ugcaaaaguaacugcgguuuuug	mml-miR-548ak-5-3p	146950926	146950948	aaaacugcaauuacuuuugcacc
yes				mml-miR-548am-1	CM002984.2	-	144924405	144924505	uucaaagacaagauaacauuagguuguugcaaaaguuguugugguuuuugucacuaaaagcaauggcaaaaacugcaguuacuuuugcccaaagauaacua	101	mml-miR-548am-1-5p	144924436	144924455	aaaguuguugugguuuuugu	mml-miR-548am-1-3p	144924472	144924491	aaaaacugcaguuacuuuug
yes				mml-miR-548am-2	CM002982.3	-	51290355	51290504	uagaggcaucagagggguugucaguugucaggguggaaaauaguacuaaguuggugcaaaagugauugcugcuuuugccauacuauuaaugccaaaaacugcaguuacuuuuacaucacuauauuacuuugacauuggaaagugauggca	150	mml-miR-548am-2-5p	51290413	51290433	aaagugauugcugcuuuugcc	mml-miR-548am-2-3p	51290448	51290468	aaaaacugcaguuacuuuuac
yes		yes	ENSMMUT00000049317	mml-miR-548am-3	CM002991.3	-	25425036	25425135	gaaauuaccauguuuuauuagguuggugcaaaaguaauugcagguuuugccauugaagguaauggaaaaaacugcaguuacuuuugcgccagccuaauau	100	mml-miR-548am-3-5p	25425066	25425086	aaaguaauugcagguuuugcc	mml-miR-548am-3-3p	25425102	25425121	aaaaacugcaguuacuuuug
yes				mml-miR-548am-5	CM002992.3	-	10048187	10048285	cuuuauauguaauauuagguuagugcaaaaguaauugcgguuuuggccauuaaaaauaauaggcaaaacugcaguuacuuuugcaccaaacuaacauaa	99	mml-miR-548am-5-5p	10048213	10048233	aaaaguaauugcgguuuuggc	mml-miR-548am-5-3p	10048250	10048270	caaaacugcaguuacuuuugc
yes				mml-miR-548am-6	CM002979.2	-	61229291	61229390	aaaaagauuuguuugccuaguauuagguugaugcaaaaguaauugcaguuuugccaauguaaugcccaaaacugcaguuacuuuuguaccaaccugauaa	100	mml-miR-548am-6-5p	61229324	61229343	caaaaguaauugcaguuuug	mml-miR-548am-6-3p	61229359	61229380	aaacugcaguuacuuuuguacc
yes				mml-miR-548am-7	CM002979.2	+	108855547	108855675	cuuuaagaacuccauaauaugcauuguuauuaagguuggugcaaaaguaauuccaguuuuugccauugaaagugauacaaaacugcaguuacuuuugcaccaucccaauagcaaggguacggauaaaga	129	mml-miR-548am-7-5p	108855589	108855608	aaaaguaauuccaguuuuug	mml-miR-548am-7-3p	108855624	108855644	caaaacugcaguuacuuuugc
yes				mml-miR-548am-8	CM002978.2	-	35565231	35565379	aucuucgaaaugcacauuggaauaaagagugcuauucagacauucuauuagguuggugugaaaguaauugaaguucuugccauuacuuucaguggcaaaacugcaguuacuuuugcaccaaccuaauaaguugcgucuuuauuuucaga	149	mml-miR-548am-8-5p	35565292	35565311	aaguaauugaaguucuugcc	mml-miR-548am-8-3p	35565326	35565346	caaaacugcaguuacuuuugc
yes				mml-miR-548am-9	CM002994.2	+	56334114	56334212	uacugaacaaaauaguauuagguuggugcagaaguaauuguggauauugccaacgaaaguggcaaaacugcaguuacuuuugcaccaaccuaacagcuc	99	mml-miR-548am-9-5p	56334143	56334164	agaaguaauuguggauauugcc	mml-miR-548am-9-3p	56334176	56334196	caaaacugcaguuacuuuugc
yes				mml-miR-548ap-1	CM002977.3	-	61285262	61285460	cuuuaugucucuaugauuuugacuacucuauguaccucauauaaagggaauauguauuagguuacugcaaaaguaauuguguuuuugugauuuuuuuuuuuaaaaaagcaaaaaccacaauuacuuuugcaccaaccuauaguauuuguuuuuaugugacugguuuauuucacuuaguauaacgucuucaaguuucauc	199	mml-miR-548ap-1-5p	61285331	61285352	aaaguaauuguguuuuugugau	mml-miR-548ap-1-3p	61285370	61285390	caaaaaccacaauuacuuuug
yes				mml-miR-548ap-2	CM002977.3	+	97566862	97567045	uuuguucaacaaguguucauuaccugcuaacuaugugccagcuuagaugcuguggaugaaaauagguuggugcaaaaguaauugugauuuuugccauuaaaauuaaaaaaccacaauuacuuuugcaccaaccuauuuucauccacagcaucuaagcuggcacauaguuagcagguaaugaaca	184	mml-miR-548ap-2-5p	97566924	97566944	uagguuggugcaaaaguaauu	mml-miR-548ap-2-3p	97566974	97566994	acaauuacuuuugcacaaacc
yes				mml-miR-548ap-3	CM002984.2	+	100556395	100556593	aauguuauucaucuaggcuuucaaugaugacauauuacauuagaaucucaagcugauagauaauuauuagguuggugcaaaaguaauuacagguuuuucuauuacuuuuaguggcaaaaaccacaauuacuuuuacaccaaccuaauauuuuucuuuauguggacucaaauaugauauaauggaauccuguuaugacac	199	mml-miR-548ap-3-5p	100556462	100556482	uagguuggugcaaaaguaauu	mml-miR-548ap-3-3p	100556521	100556541	uuacuuuuacaccaaccuaau
yes				mml-miR-548ap-4	CM002983.2	-	138925664	138925812	gcauucucaccccagccuauuacaauccagaaucagcuugcaauguuaucacguuggugcaaaaguagucgcgguuuugucauuacuuuuaguggcaaaaaccacaauuacuuuugcgguaaccuacuuauaacuacuaggaauucccu	149	mml-miR-548ap-4-5p	138925725	138925744	aaaguagucgcgguuuuguc	mml-miR-548ap-4-3p	138925759	138925779	caaaaaccacaauuacuuuug
yes				mml-miR-548ap-6	CM002982.3	-	58657387	58657495	acauuugcgugcuacauauuagguuggugcaaaaguaauugcaguuuuugcuauuaaaaguaaugguaaaaaccacaauuacuuuugcaccaauuuaauacuucccaaa	109	mml-miR-548ap-6-5p	58657417	58657436	aaaaguaauugcaguuuuug	mml-miR-548ap-6-3p	58657455	58657474	aaaaccacaauuacuuuugc
yes				mml-miR-548ap-7	CM002982.3	+	68320733	68320931	uuucuuaguuuucuuucugccagcacuacuuuauuuaacccucacagugcguuguagaagguauuauuagguuggugcaaaaaugauugcgguuuugacgugaaaaguaauggcaaaaaccacaauuacuuuugcaccaaccuaaugggaugccuaugugaugggugagggaagugagguucagagaaauguaaugccu	199	mml-miR-548ap-7-5p	68320812	68320832	aaaaugauugcgguuuugacg	mml-miR-548ap-7-3p	68320846	68320866	caaaaaccacaauuacuuuug
yes				mml-miR-548ap-8	CM002982.3	-	150207210	150207408	cuuuauaggccuuuaacccuuugauacacauucauucacuauuaacagagauuuauuaggguugguguaaaaguaauugcaguuuuugcuauuaaaaauaauggaaaaaaccacaauuacuuuugcaucaaccuaauacauaaaucauguguuuccgagugcuugguaugcacacgucaaguaggaaacggagaaaucu	199	mml-miR-548ap-8-5p	150207278	150207297	aaaaguaauugcaguuuuug	mml-miR-548ap-8-3p	150207312	150207331	ggaaaaaaccacaauuacuu
yes				mml-miR-548ap-9	CM002985.3	+	30022641	30022739	ucgccccuuccuucuauuaacguuggugcaaaaguaauugcaguuuuugccauugccucaguggcaaaaaccacaauuacuuuugcagcaaccuaauac	99	mml-miR-548ap-9-5p	30022669	30022691	caaaaguaauugcaguuuuugcc	mml-miR-548ap-9-3p	30022705	30022725	caaaaaccacaauuacuuuug
yes				mml-miR-548ap-10	CM002985.3	+	53642181	53642279	cugagaagagaaaaauacagguugguacaaaaguaacugcaguuuuugccuuuacuuuuaaugacaaaaaccacaauuacuuuuggaccaacguacacc	99	mml-miR-548ap-10-5p	53642210	53642232	aaaguaacugcaguuuuugccuu	mml-miR-548ap-10-3p	53642245	53642265	caaaaaccacaauuacuuuug
yes				mml-miR-548ap-12	CM002987.3	+	119189866	119190014	guucaguauaggugcaguuuuucuuucaaauauuuucaauucacagucauuauuuugaugcaaaaguaauugcaguuuuugccauugaaagucaugacaaaaaccacaauuacuuuugcacgaacuuaauaguugacuccacaaaugug	149	mml-miR-548ap-12-5p	119189926	119189948	caaaaguaauugcaguuuuugcc	mml-miR-548ap-12-3p	119189963	119189983	caaaaaccacaauuacuuuug
yes				mml-miR-548ap-13	CM002992.3	+	47072395	47072593	uaagauugauaauguuuaauaagcaucugugacuuuauaagccaggcuggucucugcucuuugugucuuaauauuuugcaaaaguaauugcgguuuuuaccauucacaguaaugguaaaaaccacaauuacuuuugcaccaaccuaauauuuaggacaucagacaguccacagcuuagaagacucaggccugaugacag	199	mml-miR-548ap-13-5p	47072474	47072492	aaaaguaauugcgguuuuu	mml-miR-548ap-13-3p	47072514	47072534	aaccacaauuacuuuugcacc
yes		yes	ENSMMUT00000048450	mml-miR-548ap-14	CM002989.3	-	105018632	105018780	cagaggugagggagcagggcauguaucuauuagguuggugcaaaaguaauuguggcuuugccauuacuuucaguggcaaaaaccacaauuacuuuugcaccaauuuauucauuuauuuauuuuugagacagagucucgcucuguugccc	149	mml-miR-548ap-14-5p	105018672	105018693	caaaaguaauuguggcuuugcc	mml-miR-548ap-14-3p	105018708	105018728	caaaaaccacaauuacuuuug
yes				mml-miR-548ap-16	CM002978.2	+	43521523	43521621	accuauauagauauauagguugaugcaaaaguaauugcaguuuuugccacuacuuuaaugggcaaaaaccacaauuacuuuuguaucaaccuaauauca	99	mml-miR-548ap-16-5p	43521548	43521570	caaaaguaauugcaguuuuugcc	mml-miR-548ap-16-3p	43521585	43521605	caaaaaccacaauuacuuuug
yes				mml-miR-548ap-18	CM002986.2	+	80744463	80744611	cugcagcacaucuauauuuuuccuguauuguuaggacagugcaaaaguaauugcaguuuuugccauugauaggaaggcaaaaaccacaauuacuuuuguaccaacuuaauacuugccaucauuuaaagguuauuauauuauucuaugcu	149	mml-miR-548ap-18-5p	80744504	80744526	caaaaguaauugcaguuuuugcc	mml-miR-548ap-18-3p	80744540	80744560	caaaaaccacaauuacuuuug
yes				mml-miR-548ap-20	CM002990.2	+	28891168	28891366	caaaacuauuucaaaaaucaagaguaguugacacauuauauuagguuagugcaaaaguaacggugguuuuugcccuugcuuucaauuaaaaguaccauuuguaucauuaaaaguaauggcaaaaaccacaauuacuuuugcaccaaacaaguaguuaugacaacuacuuggugcauguuuguuuaauacauuuaacuaa	199	mml-miR-548ap-20-5p	28891221	28891241	aaaguaacggugguuuuugcc	mml-miR-548ap-20-3p	28891287	28891307	caaaaaccacaauuacuuuug
yes		yes	ENSMMUT00000049152	mml-miR-548ap-21	CM002990.2	-	46312001	46312199	ggcaccagucuuuagugucacuccuuguuauguguugaauuguggcuccccaaauuauuagguuggugcaaaaguuauugcguuuuuuucaauuacuuucaauggcaaaaaccacaauuacuuuugcaccaaccuauauauguugaaguuguaacucuugggacuggugaaugugacccuaauccaguaacuggugucu	199	mml-miR-548ap-21-5p	46312071	46312090	aaaguuauugcguuuuuuuc	mml-miR-548ap-21-3p	46312106	46312126	caaaaaccacaauuacuuuug
yes				mml-miR-548ap-22	CM002995.2	-	25828640	25828738	acaauacugcauugcauuagguugaugcaaaaguaauugcaguuuuuaccauuacauuuaauaggaaaaaaccacaauuacuuuugcacuaaccuaauc	99	mml-miR-548ap-22-5p	25828668	25828686	aaaaguaauugcaguuuuu	mml-miR-548ap-22-3p	25828708	25828726	aaaccacaauuacuuuugc
yes		yes	ENSMMUT00000048918	mml-miR-548ap-23	CM002997.3	-	114971285	114971383	cagguuucuauauuauuagguuggugcaaaaguaacugcgguuuuugcuauuacuuucaauggcaaaaaccacaauuacuuuugcaucaaccuaauaga	99	mml-miR-548ap-23-5p	114971312	114971333	aaaaguaacugcgguuuuugcu	mml-miR-548ap-23-3p	114971348	114971368	caaaaaccacaauuacuuuug
yes				mml-miR-548ap-24	CM002997.3	-	120567941	120568089	auuugccauuucuugacuguacccauguuacucuuagguugauacaaaaguaauugcaguuuuugccauuggcaguaacggcaaaaaccacaauuacuuuugcaccaaccuaauguaaucccucuucugcuacaaucucccaucauagu	149	mml-miR-548ap-24-5p	120567985	120568007	caaaaguaauugcaguuuuugcc	mml-miR-548ap-24-3p	120568022	120568042	caaaaaccacaauuacuuuug
yes				mml-miR-548ap-25	CM002997.3	+	143912215	143912340	uuuauugugguaaaacauacauaacauuuuacuauuagaaaggugcaaaagucauugugauuuuuguaauuacuuucaaauggcaaaaaccacaauuacuuuugcaccaaccuaauauuuuagcca	126	mml-miR-548ap-25-5p	143912262	143912283	aaagucauugugauuuuuguaa	mml-miR-548ap-25-3p	143912298	143912318	caaaaaccacaauuacuuuug
yes				mml-miR-548ap-26	KQ738710.1	-	14996	15094	cauggcuauuaaguugcugcaaaaguaauugcaguuuuugccauugaaaacaauaacaaaaaccacaauuacuuuugcaucagccuauaguucugccag	99	mml-miR-548ap-26-5p	15017	15039	aaaguaauugcaguuuuugccau	mml-miR-548ap-26-3p	15052	15072	caaaaaccacaauuacuuuug
yes		yes	ENSMMUT00000048965	mml-miR-548ap-27	CM002979.2	+	17428549	17428747	ccucugacaggccccgguguguguuguucccuucuauguguccauguguucucaucauuuauuuagguugguccaaaaguaauugagguuuuuugccauuacuuuuaauagcaaaaaccacaauuacuuuugcaccaaccuguagcucccacuuauacgugagaacaugcaguaauugguuuucuauuccuguguuagu	199	mml-miR-548ap-27-5p	17428624	17428646	aaaguaauugagguuuuuugcca	mml-miR-548ap-27-3p	17428660	17428680	caaaaaccacaauuacuuuug
yes				mml-miR-548ar-1	CM002977.3	-	28242878	28243018	ccaaucucaagaagaagagggacagguauagauaguugugguauuuacauauauuuagcuggugcaaaaguaauugcaguuuuugccacuuuuuuuuuuaaaguaauggaaaaaacagcaauuacuuuugcacaaccuaac	141	mml-miR-548ar-1-5p	28242943	28242962	aaaaguaauugcaguuuuug	mml-miR-548ar-1-3p	28242990	28243008	aaacagcaauuacuuuugc
yes				mml-miR-548ar-2	CM002984.2	+	121089428	121089628	guuaaauuuucagauuauaugaaaugcaguacccuuuuguauuagauuugugcaaaaguaauugcaguuuuugccauuaaaaguuaaugccaguaacuuugccauuaaaaguuugccguuaaaaguaauggcaaaaaucgcaauuacuuuugcaccgaccuaauaguauagccaaauauaaaacccugacuaguguccuua	201	mml-miR-548ar-2-5p	121089481	121089500	aaaaguaauugcaguuuuug	mml-miR-548ar-2-3p	121089559	121089579	caaaaaucgcaauuacuuuug
yes				mml-miR-548ar-3	CM002984.2	-	150258562	150258712	cucaauuggaaaauggccaaauaucuuaauauuagguuggugaaaaaguaauugcaguuuuugccauuacuuacuuuuaauggaaaaaaaaaacacaauaacuuuugcaccaacuuaauacaagcuuguucagcccauggcccaggauagg	151	mml-miR-548ar-3-5p	150258605	150258624	aaaaguaauugcaguuuuug	mml-miR-548ar-3-3p	150258652	150258670	aaacacaauaacuuuugca
yes				mml-miR-548ar-4	CM002981.2	+	133712032	133712232	cccuaaauugaaacaguuuuguaaaauuugccaugucauaugguuuuggaaaauagaauuagguuggugcaaaaguaauugcaguuuuugccauugaaaguaauggaaaaaaacauaauuauauuuuugcacuaaccuaauauaaaauaaugaugcuaauuagaacauaggcgagaagcagguaccaaaguuacuuucagc	201	mml-miR-548ar-4-5p	133712102	133712121	aaaaguaauugcaguuuuug	mml-miR-548ar-4-3p	133712142	133712161	aaacauaauuauauuuuugc
yes				mml-miR-548ar-5	CM002981.2	+	176982999	176983148	gaacaccaccuucuccuucauaauacuuaucacagugugauuaauuauuagguuggggcaaaaguaauugcaguuuuugucacugaaaguaaucaaaagcugcaauuacuuuugcacuaaccuaauacacuccuuuaaggcaagucccau	150	mml-miR-548ar-5-5p	176983058	176983077	aaaaguaauugcaguuuuug	mml-miR-548ar-5-3p	176983094	176983113	aaagcugcaauuacuuuugc
yes				mml-miR-548ar-6	CM002991.3	+	58649474	58649674	uguugacaucagagcagcugcagguauauuuaggauguaaaauugacuuagaaauaaaucuguuagguuggcacaaaaguaauugcaguuuuugccauuuaaaguaauugcaaaaaccgugauuacuuuugcaccaaccuaauaguuugaguuugaugggauauauuuaugucauucacagccacuuccauguagaguuaa	201	mml-miR-548ar-6-5p	58649548	58649567	aaaaguaauugcaguuuuug	mml-miR-548ar-6-3p	58649586	58649607	aaaaccgugauuacuuuugcac
yes				mml-miR-548ar-7	CM002985.3	-	46472363	46472545	cagcuaugguaacauaugagugcuucugccacaugucuugguaccuuuauuugauuggugcaaaaguaauugcaguuuuugucauugaaaguaagggcaaaaaucgcaauuacuuuugcaccaaacuaauauaaacucauauacaaggaugugugucuguucguguuuguguguauacaugca	183	mml-miR-548ar-7-5p	46472424	46472443	aaaaguaauugcaguuuuug	mml-miR-548ar-7-3p	46472462	46472481	aaaaucgcaauuacuuuugc
yes				mml-miR-548ar-8	CM002985.3	-	53605124	53605224	gcgugugucaaacagccucagugcuuaugggcugaccuuaagcaggucugcuacaggaauguauuaggugagugcaaaaguaauugcaguuuuugcauugu	101	mml-miR-548ar-8-5p	53605134	53605154	aacagccucagugcuuauggg	mml-miR-548ar-8-3p	53605199	53605218	aaaaguaauugcaguuuuug
yes		yes	ENSMMUT00000048822	mml-miR-548ar-10	CM002978.2	+	88342525	88342725	uggguacuuuaaaucaucucuagauuacuuguaauaauacaacauaaaugcuauguauuagguuggugcaaaaguaauugcaguuuuugccauuacuuucaaagguauaaaaccacaauuacuuuugcagcaaccuaauaaauaguuguuacacuguauuguuuagggaacguguucaguauauuucuaauauuuuugauc	201	mml-miR-548ar-10-5p	88342594	88342613	aaaaguaauugcaguuuuug	mml-miR-548ar-10-3p	88342633	88342652	aaaaccacaauuacuuuugc
yes				mml-miR-548ar-11	CM002988.2	-	63061400	63061598	cccaaagcaauuuauauauucaaugcuauucccauuaaacuaccauuggcauucuucauagaaguagaaaaagcuauuagguuggugaaaaaguaauugcaguuuuuacaauuauuuucaauagcaaaaaccauaauuacuuuugcaucaaccuaauauuuuaaaauucauguggaaccaaguaagagcccaaauagcc	199	mml-miR-548ar-11-5p	63061488	63061506	aaaaguaauugcaguuuuu	mml-miR-548ar-11-3p	63061527	63061546	aaaccauaauuacuuuugca
yes				mml-miR-548ar-12	CM002986.2	-	24623356	24623556	uuucaguaggcuauuucucaauuaaguauuccuucauucagcauauuuucauuaugugccuaccauuaggcuggugcaaaaguaauugcaguuuuugccauuucuuaaaaaaaauggcaaaacuacaauuacuuauauaccaaccugauauaugcaaggcacugggccaggugcugggagucagcagugagaaggcagaug	201	mml-miR-548ar-12-5p	24623423	24623444	aggcuggugcaaaaguaauugc	mml-miR-548ar-12-3p	24623483	24623503	auuacuuauauaccaaccuga
yes				mml-miR-548ar-13	CM002990.2	-	32631152	32631352	acagaaugauguuccucaaauaauuuuuagaugauagaauuuagggugauuucuuuuuucuuuguauuaggcagguacaaaaguaauugcaguuuuugccauuacuuuuaauuacuuuuaauggcaaaaaccaguuacuuuggcacccaccuaauacuuuacuccaccauguuuuuugacaagcaacauauggaauuucaa	201	mml-miR-548ar-13-5p	32631230	32631249	aaaaguaauugcaguuuuug	mml-miR-548ar-13-3p	32631278	32631296	aaaaccaguuacuuuggca
yes				mml-miR-548ar-14	CM002990.2	-	69180666	69180865	cuuucaaguuacugcaauuuaugaagaauauauguacaucauauguaauauuuuauauuauauauaauuagcuuagguuggugcaaaaguaauugcaguuuuugugauuacuuuuaauggcaaaacccacaauuacuugugcaccaaccuaauacauaauuuauuaagaauuuauacauaugugugucuauauuacauau	200	mml-miR-548ar-14-5p	69180750	69180769	aaaaguaauugcaguuuuug	mml-miR-548ar-14-3p	69180788	69180807	aaacccacaauuacuugugc
yes				mml-miR-548ar-15	CM002995.2	-	23558728	23558828	uuggugaaauacuagcuuggugcaaaaguaauugcaguuuuugccauuacuuuuaauguaauugucauuaauuuugccaauuacuuuuccucuaauaguag	101	mml-miR-548ar-15-5p	23558751	23558770	aaaaguaauugcaguuuuug	mml-miR-548ar-15-3p	23558798	23558819	auuuugccaauuacuuuuccuc
yes				mml-miR-548ar-16	CM002995.2	+	58221835	58222033	ggaugaaauaguagccuagaguuuagugaaaauucuugaguaugguauggcuguuuggauugauuagguugguacaaaaguaauugcaguuuuuaccacauuaaaaguaauggcaaaaaccacaauugcuguugcaccaaacuaauaauauaauuuguaguggugccagaauagaaaauuugccugugucucuugauaa	199	mml-miR-548ar-16-5p	58221910	58221928	aaaaguaauugcaguuuuu	mml-miR-548ar-16-3p	58221951	58221970	aaaccacaauugcuguugca
yes		yes	ENSMMUT00000069155	mml-miR-548ar-17	CM002993.2	+	13088097	13088295	ugguuucucuacgauuccggaauuggauuuuaaaauucuccuguuucuaucagguuggugcaaaaguaauugcaguuuuuaccauuacauuuaaugcaaaacacauuauauuaauugcaaaaaccgcaauuauuuuugcaccaaccuaauaugaagacccaaaguugucaucucuacuccugcagugggaacuccuuac	199	mml-miR-548ar-17-5p	13088157	13088180	caaaaguaauugcaguuuuuacca	mml-miR-548ar-17-3p	13088215	13088236	aaaaaccgcaauuauuuuugca
yes				mml-miR-548as-1	CM002980.3	+	24480542	24480743	gugagccaauacacugcugaccuagccccaauggaacaugcuuucuauuagguuggugcaaaaguaauugcggguuuugccauuacaaguaaucacaauuaauagcaaaacccacaauuacuuuugcacgaacauaacggauggaaaaaaccagguuauagacauguuauugugaauacauaaauaaauaaauagagaucua	202	mml-miR-548as-1-5p	24480590	24480610	uagguuggugcaaaaguaauu	mml-miR-548as-1-3p	24480659	24480681	uuacuuuugcacgaacauaacgg
yes		yes	ENSMMUT00000065525	mml-miR-548as-2	CM002984.2	+	125151154	125151251	guuagaugcauuaggcugcugcaaaaguaauugcgguuuuugcgauuaaaaguaaucgcaaaaaucgcaauuacuuuugcagaaaccuaauaaauuuc	98	mml-miR-548as-2-5p	125151176	125151197	aaaaguaauugcgguuuuugcg	mml-miR-548as-2-3p	125151212	125151232	caaaaaucgcaauuacuuuug
yes				mml-miR-548as-3	NC_007861.1	+	162941172	162941322	uaggaaaguacuugacaaguuacauauuagguuggugcaaaaguaauugcggguuuugcaauauauauauauauauaaauauaauauauuuucaauagcaaaaaccacaguuacguuugcacuugccuauauccagauuguagaaagaaca	151	mml-miR-548as-3-5p	162941199	162941219	uagguuggugcaaaaguaauu	mml-miR-548as-3-3p	162941282	162941301	uuacguuugcacuugccuau
yes				mml-miR-548as-4	CM002985.3	+	28603251	28603400	aggcgaaagguuguaggcacuaaaaccaauuucaucuauuggguuggugcaaaaguaauugcggguuuugauauuaaaaguaauggcaaaaaccacaauuacuuuuguacuaacccgauacuucacaguuuuagaccagaccacucuuca	150	mml-miR-548as-4-5p	28603302	28603323	aaaguaauugcggguuuugaua	mml-miR-548as-4-3p	28603337	28603357	caaaaaccacaauuacuuuug
yes		yes	ENSMMUT00000049810	mml-miR-548as-5	CM002988.2	-	25267073	25267222	caguacauacuugagugaauaagcuuuagguuggugcaaaaguaauugcggguuuugucauuacuuuuaacggcaaaaaccucaauuacuuuugcagcaaccuaauauguccgcauuguacccuagcccauuacaacaggaacgaaauua	150	mml-miR-548as-5-5p	25267099	25267119	uagguuggugcaaaaguaauu	mml-miR-548as-5-3p	25267158	25267182	uuacuuuugcagcaaccuaauaugu
yes				mml-miR-548au-1	CM002977.3	+	50371408	50371506	ugcuaggauuugugguuggugcaaaaguaauugcgguuuuuaccauuacuuucaauggcaagaaccgcgauuacuucugcaccaaccuaauaguuucuu	99	mml-miR-548au-1-5p	50371430	50371448	aaaaguaauugcgguuuuu	mml-miR-548au-1-3p	50371469	50371487	gaaccgcgauuacuucugc
yes				mml-miR-548au-3	CM002980.3	-	38500478	38500576	caaagaagaaacaauuuggcccaugcaaaaguaauugcgguuuuuuccccauugaaaguaauggcaaaaacugcaaugacuuuugcaccaaccuaauaa	99	mml-miR-548au-3-5p	38500504	38500522	aaaaguaauugcgguuuuu	mml-miR-548au-3-3p	38500545	38500563	aaacugcaaugacuuuugc
yes				mml-miR-548au-4	CM002980.3	+	88570322	88570470	cugccaggaaaaggccaugcaacauaaaaauaucaggugcgugcaaaaguaauugcgguuuuuacaguuacuuuuaguggcaaaauucgcaauuacuuuugcaccaaccuaauaguaauuguugauaacugaacacccuuuuccccaga	149	mml-miR-548au-4-5p	88570366	88570384	aaaaguaauugcgguuuuu	mml-miR-548au-4-3p	88570405	88570423	aauucgcaauuacuuuugc
yes		yes	ENSMMUT00000054864	mml-miR-548au-5	CM002980.3	+	176763426	176763526	gccauuuguauuagguuggugcaaaaguaauugcgguuuuugcuauuaaaaguauggcauaaacugcaauuacuucuacaccaaccuaauauuucuagugu	101	mml-miR-548au-5-5p	176763448	176763467	aaaaguaauugcgguuuuug	mml-miR-548au-5-3p	176763486	176763505	aaacugcaauuacuucuaca
yes				mml-miR-548au-6	CM002980.3	-	182083431	182083581	cuuaagcccugacaccaaacuuaccgguaauauuagauuggggcaaaaguaauugcgguuuuugccauuacuuuuaaugcccauugcuuuuaauggcagaaacugcaauuaccuuugcaccaaccuauugcaacccugaacaccacaccac	151	mml-miR-548au-6-5p	182083475	182083494	aaaaguaauugcgguuuuug	mml-miR-548au-6-3p	182083529	182083548	gaaacugcaauuaccuuugc
yes				mml-miR-548au-7	JSUE03061562.1	-	114	214	cagguuaguacaaaaguaauugcgguuuuugccauuuaaaaguaaugguuuugccauuuaacacuaauggcaaaaauugcaauuacuuuugcaccaacuua	101	mml-miR-548au-7-5p	125	144	aaaaguaauugcgguuuuug	mml-miR-548au-7-3p	184	203	caaaaauugcaauuacuuuu
yes				mml-miR-548au-8	CM002984.2	+	82633669	82633769	gcaaauaaaaauccuauuacguugguacaaaaguaauugcgguuuuugccauggaaagcaauggccaaaaucgcgauuacuuuugcauuaaccuaauggaa	101	mml-miR-548au-8-5p	82633697	82633716	aaaaguaauugcgguuuuug	mml-miR-548au-8-3p	82633737	82633756	aaucgcgauuacuuuugcau
yes				mml-miR-548au-10	CM002984.2	+	171214907	171215005	uuaacccuguuaggucggugcaaaaguaauugcgguuuuuaccauugaaaguaacaucaaaagcugcaaugacuuuugcaccaacccagugcuuguuac	99	mml-miR-548au-10-5p	171214928	171214946	aaaaguaauugcgguuuuu	mml-miR-548au-10-3p	171214967	171214985	aagcugcaaugacuuuugc
yes		yes	ENSMMUT00000049443	mml-miR-548au-11	CM002983.2	-	53031338	53031486	ugugaauuucagccagucugugaccuccuccaaguauuuuaccauuuuauuagguuggugcaaaaguaauugcgguuuuuaccauugaaaguaauggcaaacacugcaauuauuuuuguaccaaucuaauagauuucaacucaauuuga	149	mml-miR-548au-11-5p	53031399	53031417	aaaaguaauugcgguuuuu	mml-miR-548au-11-3p	53031440	53031457	acugcaauuauuuuugua
yes				mml-miR-548au-12	CM002983.2	+	59809134	59809232	cauguuuuuauuagguuagugcaaaaguaauugcgguuuuuugcaaucauuuucaacagcaaaaaccacaauuacauuugcccaaaccuaauauaagcu	99	mml-miR-548au-12-5p	59809156	59809174	aaaaguaauugcgguuuuu	mml-miR-548au-12-3p	59809196	59809214	aaaccacaauuacauuugc
yes				mml-miR-548au-14	CM002981.2	+	95529976	95530074	ccugaagaauugcaaauacuagguugcugcaaaaguaauugcgguuuuucauuaaaaauagugacaaagacugcaauaacuuuugcaccaaccuaguaa	99	mml-miR-548au-14-5p	95530006	95530024	aaaaguaauugcgguuuuu	mml-miR-548au-14-3p	95530043	95530061	agacugcaauaacuuuugc
yes				mml-miR-548au-16	CM002981.2	+	144381163	144381261	agccaauuguaauacuauuagguuggcucaaaaguaauugcgguuuuuaccauugcuuuuaauggcaaaacugcaaguacauuugcaccaaccuaauaa	99	mml-miR-548au-16-5p	144381192	144381210	aaaaguaauugcgguuuuu	mml-miR-548au-16-3p	144381231	144381250	aacugcaaguacauuugcac
yes				mml-miR-548au-17	CM002981.2	+	147697088	147697165	cgaaccauuaauuggguugguacaaaaguaauugcgguuuuugccauuuuuaaaaaaauggucaaaaccacaauuccc	78	mml-miR-548au-17-5p	147697111	147697130	aaaaguaauugcgguuuuug	mml-miR-548au-17-3p	147697152	147697173	aaaccacaauucccuuuuuuuu
yes				mml-miR-548au-19	CM002981.2	+	176624448	176624597	gaguguucaaggcaggguccaaugauuaagaacuauuagguugguguaaaaguaauugcgguuuuugcaauugcuuuuaauggcaaaaaucgcaguuacuuuuucaccaaccuaauaaaaggaugaggauaaaggaaaguaaguugaguc	150	mml-miR-548au-19-5p	176624495	176624514	aaaaguaauugcgguuuuug	mml-miR-548au-19-3p	176624533	176624553	aaaaucgcaguuacuuuuuca
yes				mml-miR-548au-20	CM002982.3	+	3774060	3774208	ccacuggcccagacaaguucaugacggcaccacgaaacuguuagguugguggaaaaguaauugcgguuuuuuaaaaguaauggcagaaacugcaauuauguuuucaccaaacuaauaugucuauagucauggcaaagguugcuauucug	149	mml-miR-548au-20-5p	3774112	3774130	aaaaguaauugcgguuuuu	mml-miR-548au-20-3p	3774146	3774164	aaacugcaauuauguuuuc
yes				mml-miR-548au-22	CM002987.3	-	16535868	16535966	augaaccuccauguauucagcuggugcaaaaguaauugcgguuuuuaauggcaaaaaccacaauuauuucugcaccaaccuaauagauacuacgauggc	99	mml-miR-548au-22-5p	16535895	16535913	aaaaguaauugcgguuuuu	mml-miR-548au-22-3p	16535922	16535940	aaaccacaauuauuucugc
yes				mml-miR-548au-23	CM002987.3	-	81178967	81179117	auuaagaauuaauuauaaaaugauauuuacauaauauuagauugguguaaaaguaauugcgguuuuugccauuacuuuuaauguaaaaaccacaacuacuuuugcaccaaccuaaugaaacauuugccugauuugauaaagcuucugaauc	151	mml-miR-548au-23-5p	81179015	81179034	aaaaguaauugcgguuuuug	mml-miR-548au-23-3p	81179052	81179071	aaaaccacaacuacuuuugc
yes				mml-miR-548au-24	CM002992.3	-	21683393	21683543	cucaagacaucacuaacaccugguugguauuauuagguugguacaaaaguaauugcgguuuuugcuguucaagguacauuuuaccuuuuuaaaauaguaacuaccacaauuacuuuugcaccaacauaauaaaauuuaaacuuagguauaa	151	mml-miR-548au-24-5p	21683437	21683456	aaaaguaauugcgguuuuug	mml-miR-548au-24-3p	21683492	21683512	acuaccacaauuacuuuugca
yes				mml-miR-548au-25	NC_007867.1	+	26115571	26115721	nnnnnnnnnnnnnnnnnnnnnnnnnnnnnnnnnnnnnnnnnnnnnnnnnnnnnnnnnnnnnnnnnnnnnnnnnnnnnnnnnnnnnnnnnaaaaaaaaaaguaauugcgguuuuugcauuaaaaguaauggcaaaaaccgcaauuacuuuug	151	mml-miR-548au-25-5p	26115666	26115685	aaaaguaauugcgguuuuug	mml-miR-548au-25-3p	26115701	26115721	caaaaaccgcaauuacuuuug
yes				mml-miR-548au-26	CM002989.3	-	37627429	37627527	uauguauauauauuagguuggugcaaaaguaauugcgguuuuuaccauuaauuuuagugacaaaaaccacaguuaccuuugcaccaaccgaauacaugg	99	mml-miR-548au-26-5p	37627453	37627471	aaaaguaauugcgguuuuu	mml-miR-548au-26-3p	37627492	37627510	aaaccacaguuaccuuugc
yes				mml-miR-548au-27	CM002979.2	+	72384630	72384730	aauaaacaauguauuagguucugcgcaaaaguaauugcgguuuuugccaugaaaguaauggccaaaacgguaauugcuugugcaccaaccaaaauaguguc	101	mml-miR-548au-27-5p	72384656	72384675	aaaaguaauugcgguuuuug	mml-miR-548au-27-3p	72384694	72384710	aaacgguaauugcuugu
yes		yes	ENSMMUT00000049185	mml-miR-548au-29	CM002979.2	-	81908770	81908918	agggaaaacaaaaagguuuacaacuugaucuucuagaaauauaagguuggugcaaaaguaauugcgguuuuuaccauaccuuccaauggcaagaacugcaauuaauuuugcgccaaccuaauaauuacugguuuuaaaacgaagagcua	149	mml-miR-548au-29-5p	81908823	81908841	aaaaguaauugcgguuuuu	mml-miR-548au-29-3p	81908862	81908880	gaacugcaauuaauuuugc
yes				mml-miR-548au-30	CM002978.2	+	42581400	42581549	accaaguguauuggauuauagaaaggugccuuuaacuuuuauuagguugguguaaaaguaauugcgguuuuugucauuacuuucuucgaaaauaaacaauuacuuuugcaccaaccuaauaccuuuucucauagcagccuucuggauccu	150	mml-miR-548au-30-5p	42581453	42581472	aaaaguaauugcgguuuuug	mml-miR-548au-30-3p	42581488	42581508	aaaauaaacaauuacuuuugc
yes		yes	ENSMMUT00000049292	mml-miR-548au-31	CM002979.2	-	6559649	6559799	aucucauaaccuuuccaaagugaaccacuauuaaauuagauuggugcaaaaguaauugcgguuuuugccauuacuuuuaguggcaaaaaucgcaacugcuuuugcaccaaccugaugauaacaauucaguguauuuccucccagacuaugc	151	mml-miR-548au-31-5p	6559696	6559715	aaaaguaauugcgguuuuug	mml-miR-548au-31-3p	6559734	6559753	aaaaucgcaacugcuuuugc
yes				mml-miR-548au-32	CM002988.2	-	99027437	99027585	uucaagaaaaaauucuuuaccgucuuuuuaaacauuauuuuauuagguugguguaaaaguaauugcgguuuuuuuaacgcaauggcaaaaggugcaauuacuuuggcaccaaccuaguauuuaaugcuuacaauaacuucacaaguaag	149	mml-miR-548au-32-5p	99027491	99027509	aaaaguaauugcgguuuuu	mml-miR-548au-32-3p	99027523	99027540	aaaaggugcaauuacuuu
yes				mml-miR-548au-33	CM002986.2	-	39600984	39601132	cagagguauaguguuaggucggcacaaaaguaauugcgguuuuuugccauuuaaaaaaaaaaacaaaaaacaaaaaaacccacaaaaaaacggcaaaaaucgcaauuacuuuuguaccaaccuauaaccaaaacagcauaauacuggca	149	mml-miR-548au-33-5p	39601009	39601027	aaaaguaauugcgguuuuu	mml-miR-548au-33-3p	39601080	39601098	aaaucgcaauuacuuuugu
yes				mml-miR-548au-34	CM002990.2	+	6752248	6752398	aagauagauuuuucuucuaaaaguauuaaauuggugaaaaaguaauugcgguuuuugccauucucaauuuaccuaaacuuguaaaauauguuugagaaugucacaaauuagaccaguuauuuuuguuaccaaagaaauaaauuauucuaua	151	mml-miR-548au-34-5p	6752285	6752304	aaaaguaauugcgguuuuug	mml-miR-548au-34-3p	6752352	6752374	aaauuagaccaguuauuuuuguu
yes				mml-miR-548au-35	CM002990.2	-	54991936	54992034	agaguuuuguuacuagguuggugcaaaaguaauugcgguuuuucucaaagggauggcauaaacuguaguuacucuugcaccagccuguacuauggaauc	99	mml-miR-548au-35-5p	54991960	54991978	aaaaguaauugcgguuuuu	mml-miR-548au-35-3p	54991996	54992013	aacuguaguuacucuugc
yes				mml-miR-548au-36	CM002990.2	+	80924689	80924809	aaaagagcaggagguaauauuagacuuuaauaacuuuguuuuguuacaggcuggugcaaaaguaauugcgguuuuugccauuaaaaguaaaauggcaauuacuuuuguaccaaccuguauu	121	mml-miR-548au-36-5p	80924746	80924765	aaaaguaauugcgguuuuug	mml-miR-548au-36-3p	80924778	80924796	aaauggcaauuacuuuugu
yes				mml-miR-548au-37	CM002990.2	-	89033700	89033850	uacuaguuaaccauguaaacaucuacaauguauuagauuggugcaaaaguaauugcgguuuuugccaucccuuuuauggcaaaaaccacaauuccuuuuacauccaccuaauacuuaauuuuugugggccucuguuucuccaguugugaaa	151	mml-miR-548au-37-5p	89033744	89033763	aaaaguaauugcgguuuuug	mml-miR-548au-37-3p	89033781	89033801	aaaaccacaauuccuuuuaca
yes				mml-miR-548au-38	CM002993.2	+	5389065	5389164	uuucccccaacguauuagguuggcacaaaaguaauugcgguuuuuggcaucaaaagucauggcaaacacugcaguaacuucugcgccaaccuaauguaug	100	mml-miR-548au-38-5p	5389091	5389110	aaaaguaauugcgguuuuug	mml-miR-548au-38-3p	5389129	5389149	aacacugcaguaacuucugcg
yes				mml-miR-548au-40	CM002993.2	+	68104865	68104964	auugcuuucaagauguaguaaguuggagcaaaaguaauugcaguuuuugccuuugaaaguaauggcaguuacuuuugcaccaaccuaauacaaaacaucc	100	mml-miR-548au-40-5p	68104894	68104913	aaaaguaauugcaguuuuug	mml-miR-548au-40-3p	68104926	68104942	auggcaguuacuuuugc
yes		yes	ENSMMUT00000049341	mml-miR-548au-41	CM002997.3	-	107294707	107294857	cuaaaaucacaagcucaggcccuauuauuacguuggugcaaaaguaauugcgguuuuugccauuacuuucacuugcaaaaaaacacaauuacuuuugcaccaaccuaauaaaaauuauuuauauauacuuuggggcaucuuauuucaaggu	151	mml-miR-548au-41-5p	107294746	107294765	aaaaguaauugcgguuuuug	mml-miR-548au-41-3p	107294784	107294804	aaaaaacacaauuacuuuugc
yes				mml-miR-548au-42	CM002993.2	+	5389065	5389164	uuucccccaacguauuagguuggcacaaaaguaauugcgguuuuuggcaucaaaagucauggcaaacacugcaguaacuucugcgccaaccuaauguaug	100	mml-miR-548au-42-5p	5389091	5389110	aaaaguaauugcgguuuuug	mml-miR-548au-42-3p	5389129	5389149	aacacugcaguaacuucugcg
yes				mml-miR-548av-1	CM002983.2	-	89079093	89079241	aaucaagagggcugucugugaacauacuacugcauauauuagguugguacgaaaguaauugcuguuuuugccauugcuuuaauagcaaaaacugcaguuacuuuuguaccaacauaauaaaauucugggcuuuuguaucaaucuuccca	149	mml-miR-548av-1-5p	89079140	89079161	uacgaaaguaauugcuguuuuu	mml-miR-548av-1-3p	89079181	89079202	aaacugcaguuacuuuuguacc
yes				mml-miR-548av-2	CM002981.2	-	181170974	181171123	cgauuuacaggccuccauaaaagguccucaaaugacaauuauuagguuggugcaaaaguaauugcaguucuucucaucauuuuuaauggcaaaaaacugcaguuacuuuugcaccaacuugauccaaucucauuauucaggacuuuccua	150	mml-miR-548av-2-5p	181171028	181171048	aaaguaauugcaguucuucuc	mml-miR-548av-2-3p	181171065	181171084	aaaaacugcaguuacuuuug
yes				mml-miR-548av-3	NC_007863.1	+	135222284	135222383	cuauguauuagguuggugcaaaaguaguugugguuuuggccauuuaaaaaaaaaaguaauggugaaaacugcaguuacuuuugcaccaacguauauuagu	100	mml-miR-548av-3-5p	135222292	135222312	uagguuggugcaaaaguaguu	mml-miR-548av-3-3p	135222360	135222377	acuuuugcaccaacguau
yes				mml-miR-548av-4	CM002979.2	+	58695491	58695590	uuauguauuuacauauagauuggugcaaaaguaauugugguuaaaaguaauggcaaaaacugcaguuacuuuugcacaaaccuaauaguuucaggauacu	100	mml-miR-548av-4-5p	58695518	58695538	aaaguaauugugguuaaaagu	mml-miR-548av-4-3p	58695545	58695564	aaaaacugcaguuacuuuug
yes		yes	ENSMMUT00000064054	mml-miR-548av-5	CM002995.2	-	63015166	63015315	aguauguauugucuuuuuaacuaugacuuggugcaaaaguacuuguggauuugccauuaccuuuaccuuuaauggcaaaacugcaguuacuuuugcaccaaccuaaauguuauauuuacacugcugacacaaaauauucucauuucuguc	150	mml-miR-548av-5-5p	63015200	63015220	aaaaguacuuguggauuugcc	mml-miR-548av-5-3p	63015241	63015261	caaaacugcaguuacuuuugc
yes				mml-miR-548ax-1	CM002977.3	-	155854754	155854852	agaaucguauuagguugcugcaaaaguaauugcgguuuugccguugaaaguaaugacaaaaaccacaauuacuuuugcuccaaccuaauauauccuuca	99	mml-miR-548ax-1-5p	155854775	155854796	aaaaguaauugcgguuuugccg	mml-miR-548ax-1-3p	155854810	155854830	caaaaaccacaauuacuuuug
yes				mml-miR-548ax-2	CM002991.3	-	23270194	23270293	uuuaaguagucaguucuaucagguuggugcaaaaguaauugcgguuuugccauuacuuuuaauagcaauaaccacaauuacuuuugccccaacugaauaa	100	mml-miR-548ax-2-5p	23270222	23270242	gcaaaaguaauugcgguuuug	mml-miR-548ax-2-3p	23270261	23270283	auaaccacaauuacuuuugcccc
yes				mml-miR-548ax-4	CM002987.3	+	28901656	28901805	ucggcaaacauagcaagguacgagguuggcgcaaaaguaauugcgguuuugccauuacuuucaauggugaaaaccacaauuaauuugccauuacuuucaauggcaaaaaccacaauuacuuuuacacuagcauaguacacuacagcauga	150	mml-miR-548ax-4-5p	28901686	28901706	gcaaaaguaauugcgguuuug	mml-miR-548ax-4-3p	28901762	28901783	aaaccacaauuacuuuuacacu
yes				mml-miR-548ax-5	CM002979.2	+	19240068	19240150	gaaucccaguuggggcaaaaguaauugcgguuuugccauuacuuuugcaacugcaauuacuuuugcaacaacuuaauacauac	83	mml-miR-548ax-5-5p	19240082	19240102	gcaaaaguaauugcgguuuug	mml-miR-548ax-5-3p	19240117	19240137	acugcaauuacuuuugcaaca
yes				mml-miR-548ax-6	CM002993.2	-	8443908	8444007	auauauuacuguuaacuauuagguuggugcaaaaguaauugcgguuuugccauuacuuucaauggcaaaaaccauaaucucuuugcuauagaacacuaga	100	mml-miR-548ax-6-5p	8443936	8443956	gcaaaaguaauugcgguuuug	mml-miR-548ax-6-3p	8443976	8443996	aaaccauaaucucuuugcuau
yes				mml-miR-548az-1	CM002977.3	-	99090495	99090595	agugcuuugaaguauuagguuggugcaaaaguaauuucaguuuucuaucacuuucaauggcaaaaacugcaaucacuuuugcaccaaccucuaacuguacu	101	mml-miR-548az-1-5p	99090510	99090530	uagguuggugcaaaaguaauu	mml-miR-548az-1-3p	99090567	99090589	ucacuuuugcaccaaccucuaac
yes				mml-miR-548az-2	CM002977.3	-	217659175	217659275	cauugcuaacacuaguuggugcaaaagugauugugguuuuugucauuacuuuucauugcaaaaaccacaguuacauuugcagcaaccuaguaguagucaua	101	mml-miR-548az-2-5p	217659197	217659218	aaaagugauugugguuuuuguc	mml-miR-548az-2-3p	217659234	217659254	aaaaaccacaguuacauuugc
yes				mml-miR-548az-3	CM002982.3	+	55773707	55773806	caguugaucuauuauguuggugccaaagugauugugguuuuugccauuauuuucagugacaaaaacugcaauuacuuuggcaccaaccugauacaucagu	100	mml-miR-548az-3-5p	55773734	55773752	gugauugugguuuuugcca	mml-miR-548az-3-3p	55773766	55773783	caaaaacugcaauuacuu
yes		yes	ENSMMUT00000078246	mml-miR-548az-4	CM002988.2	-	88610268	88610368	gcacuguauauauuagguugaugcaaaagugauugugauuuuugccgcuacuuuuaauggcaaaaacugcaaucacuuuugcaccaaccuaauaguugacu	101	mml-miR-548az-4-5p	88610288	88610309	augcaaaagugauugugauuuu	mml-miR-548az-4-3p	88610332	88610353	aacugcaaucacuuuugcacca
yes				mml-miR-548az-5	CM002993.2	+	46077481	46077581	ccugugaggcaacuauuagguuggugcaaaaguaauuucagucauugccauuacuuucaguggcaaaaacugcaaucacuuuugcaccaaccgaauagaua	101	mml-miR-548az-5-5p	46077497	46077517	uagguuggugcaaaaguaauu	mml-miR-548az-5-3p	46077556	46077576	ucacuuuugcaccaaccgaau
yes				mml-miR-548b	CM002993.2	-	9940052	9940252	cacacauucaugaaagaagucuauaaaucaauguugauuaacagccacauuaagugcuaugaaaauauuagguuguuguaaaaguaauugcuguuuuugccauuaaaagugguggcaguaacagcaauuacuuuugcaccaaccuaauacaagaaagagcauagaagagaggaaauuugccuaaucagugaagguauggaa	201	mml-miR-548b-5p	9940129	9940149	guaaaaguaauugcuguuuuu	mml-miR-548b-3p	9940171	9940191	aacagcaauuacuuuugcacc
yes	yes	yes	ENSMMUT00000048421	mml-mir-548b	CM002983.2	+	148755929	148756025	caggcuauguauuuagguuggugcaaaaguaauuggggcuugggccuuuauuuucaauggcaaaaaccucaauugcuuuugugccaaccuaauacuu	97	mml-mir-548b-5p	NA	NA	NA	mml-mir-548b-3p	148755989	148756010	caaaaaccucaauugcuuuugu
yes				mml-miR-548b-1	CM002977.3	+	71944267	71944365	ugaagucacaccuacuaggucagugcaaaaguaauugugguuuugccacugaaaguaauggcaaaaacagcaauuacuuuugcaccuaccuauaguuau	99	mml-miR-548b-1-5p	71944289	71944311	gugcaaaaguaauugugguuuug	mml-miR-548b-1-3p	71944330	71944355	aaaacagcaauuacuuuugcaccuac
yes				mml-miR-548b-2	CM002977.3	+	177259786	177259934	caaaauauguggaauuauaugauuaucuuaauguguaucaaauauuagguuggugcaaaaguaauugugguuuugccauuaaaaguaaugcaaaaaccacaguuacuuucuugccaaccuaagauacaauauaaucaucagaaauaacu	149	mml-miR-548b-2-5p	177259838	177259860	gugcaaaaguaauugugguuuug	mml-miR-548b-2-3p	177259880	177259901	aaccacaguuacuuucuugcca
yes				mml-miR-548b-3	CM002980.3	+	25123847	25123945	uuuccucaccuguuagguuggugcaaaaguaauugugguuuugccaacuaaaguaauagcaaaaaccgcaaucacuuugaaacaacguaaauacaaugu	99	mml-miR-548b-3-5p	25123867	25123889	gugcaaaaguaauugugguuuug	mml-miR-548b-3-3p	25123909	25123930	aaaccgcaaucacuuugaaaca
yes				mml-miR-548b-4	CM002980.3	+	79611302	79611500	gcacaccuucggaggagagccaugaagcuagaaacuugcacaagggugauaguauuuuuuguuagguuggugcaaaaguaauugugguuuugcaauuuaaaaauguggaaaacgcaauuucuuuugcaccaaccuaauaaaaaacaaauaaauucuaaauuuguucauuuuggggucaauuuugcaauuguuuuaagga	199	mml-miR-548b-4-5p	79611371	79611393	gugcaaaaguaauugugguuuug	mml-miR-548b-4-3p	79611411	79611432	aaacgcaauuucuuuugcacca
yes				mml-miR-548b-5	CM002980.3	-	91514670	91514768	auauauaaauauuagaauggugcaaaaguaauugugguuuugcuauugaaaguaacagcaaaaccccuaguuacuuuugcaccaaccuauagcuuauag	99	mml-miR-548b-5-5p	91514689	91514711	gugcaaaaguaauugugguuuug	mml-miR-548b-5-3p	91514730	91514753	aaaccccuaguuacuuuugcacca
		yes	ENSMMUT00000049955	mml-miR-548b-6	CM002979.2	+	67060507	67060579	uauuagguuggugcaaaaaguaauugugguuuuuaaaacggcaaaaacugcaauugcuuuugcauccaucuaa	73	mml-miR-548b-6-5p	67060519	67060539	gcaaaaaguaauugugguuuu	mml-miR-548b-6-3p	67060548	67060568	caaaaacugcaauugcuuuug
yes				mml-miR-548b-10	CM002983.2	+	8553827	8553928	uuugugucauagcuauuagguuggugcaaaaguaauugugguuuuggccauuacuuuccaugggaaaaacugcaauuacuuuugcacaaacuuaauaaugua	102	mml-miR-548b-10-5p	8553850	8553872	gugcaaaaguaauugugguuuug	mml-miR-548b-10-3p	8553894	8553916	aacugcaauuacuuuugcacaaa
yes		yes	ENSMMUT00000049677	mml-miR-548b-12	CM002983.2	-	156057062	156057162	ggaucagagaagggguauuagguuggugcaaaaguaauugugguuuuggcuguuacuuuuaauggcaaaaacuacaguuauuuuugcaccaacccaauaca	101	mml-miR-548b-12-5p	156057087	156057109	gugcaaaaguaauugugguuuug	mml-miR-548b-12-3p	156057131	156057152	aacuacaguuauuuuugcacca
yes				mml-miR-548b-13	CM002981.2	+	138814039	138814169	guuaacagcacuauuuccaaacauauuagguuggugcaaaaguaauugugguuuugaccauuacguucaaugguaaaaaacacaguuacuuuugcagcaaucuaauauauguugguauguccuuaauuuua	131	mml-miR-548b-13-5p	138814072	138814094	gugcaaaaguaauugugguuuug	mml-miR-548b-13-3p	138814116	138814137	aaacacaguuacuuuugcagca
yes				mml-miR-548b-15	CM002982.3	+	110542582	110542747	uuuaagauaugucauaaauacaugaaauauauacauuagguugaugcaaaaguaauugugguuuugcuuuugaaaguaauggaaaaaaccgcaacugcuuucacacaaccuaauagauacuagucuauguguuaacugacugcuuauguuaucuguaaggcuucaa	166	mml-miR-548b-15-5p	110542626	110542647	ugcaaaaguaauugugguuuug	mml-miR-548b-15-3p	110542667	110542688	aaaccgcaacugcuuucacaca
yes				mml-miR-548b-16	CM002982.3	+	160532583	160532681	caaccaaaauaugauagguuggugcaaaaguaauugugguuuugcuauuaaaaugguggcaaaagccccaguuacuuucauaccaaccuaauaaauaug	99	mml-miR-548b-16-5p	160532604	160532626	gugcaaaaguaauugugguuuug	mml-miR-548b-16-3p	160532645	160532667	aagccccaguuacuuucauacca
yes				mml-miR-548b-17	CM002991.3	-	45760623	45760721	caaacaagggcaaaugugcuauuggugcaaaaguaauugugguuuugccuuuuuuuaaaaugguaauuacuuuugcaccaaccuaauaaaauggcaaua	99	mml-miR-548b-17-5p	45760647	45760669	gugcaaaaguaauugugguuuug	mml-miR-548b-17-3p	45760680	45760702	aaaugguaauuacuuuugcacca
yes				mml-miR-548b-18	CM002991.3	+	55910633	55910731	agagaaugagggaguuauucgauuggugcaaaaguaauugugguuuugccauuauuuugauugcaacacugcaguuacuuuugcaccagccuaauaaca	99	mml-miR-548b-18-5p	55910658	55910680	gugcaaaaguaauugugguuuug	mml-miR-548b-18-3p	55910698	55910720	acacugcaguuacuuuugcacca
yes				mml-miR-548b-19	CM002991.3	+	158408263	158408411	agcccaggaaauaugacuuguugaugccuaauacuauuagguuaguguaaaaguaauugugguuuugccauugaaaguaguggcaaaaaccacaauuacuuuugcaccaaccuacuauacauuuacgaugaucaaugugauaacucugu	149	mml-miR-548b-19-5p	158408312	158408331	aaaguaauugugguuuuguc	mml-miR-548b-19-3p	158408346	158408366	caaaaaccacaauuacuuuug
yes				mml-miR-548b-20	CM002985.3	+	52653659	52653757	cuacuacuacugcugcuaguaaguuggugcaaaaguaauugugguuuugucauuaacaguaauggcaaaauggcaauuacuuuugcaccaaccugcuac	99	mml-miR-548b-20-5p	52653685	52653707	gugcaaaaguaauugugguuuug	mml-miR-548b-20-3p	52653726	52653748	aaauggcaauuacuuuugcacca
yes				mml-miR-548b-21	CM002985.3	-	63558550	63558698	gauagacaaaauagcugaccaaauucuucccccuuuuaauuccauucaacaaauaggagauuggugcaaaaguaauugugguuuuguuaauaaaaguaauggcaaaaacugcaacuacuuuugcaccaaccuaauacuuauugagcccc	149	mml-miR-548b-21-5p	63558613	63558635	gugcaaaaguaauugugguuuug	mml-miR-548b-21-3p	63558655	63558677	aaacugcaacuacuuuugcacca
yes				mml-miR-548b-22	CM002987.3	-	26575995	26576096	uauuuaguuacuauuauauuagguuggugcaaaaguaauugugguuuuggccauuacucuuaauugugaaaacugcaauuacuuuuguaccaaccuaauguu	102	mml-miR-548b-22-5p	26576021	26576043	gugcaaaaguaauugugguuuug	mml-miR-548b-22-3p	26576065	26576086	aacugcaauuacuuuuguacca
yes				mml-miR-548b-23	CM002987.3	+	116573199	116573347	cuuauaggaccuucuacaaugguuuagugauuaggaauguauuagguuggugcaaaaguaauugugguuuugccauuaaaagugaugaucaaaacagcaauuaccuuugcgacaacauaauaagauaucagaccaugauaguugugauu	149	mml-miR-548b-23-5p	116573248	116573270	gugcaaaaguaauugugguuuug	mml-miR-548b-23-3p	116573290	116573312	aaacagcaauuaccuuugcgaca
yes				mml-miR-548b-24	CM002992.3	-	38706148	38706246	gacugcuuuuucacagauauuauagguuagugcaaaaguaauugugguuuugacauugaccaaaacuacaauuacuuuugcaucaaccuaauaauuuga	99	mml-miR-548b-24-5p	38706177	38706199	gugcaaaaguaauugugguuuug	mml-miR-548b-24-3p	38706210	38706233	aaacuacaauuacuuuugcaucaa
yes				mml-miR-548b-25	CM002989.3	+	46098304	46098405	uucuggaaaccuuaauauaucaggcuggugcaaaaguaauugugguuuuggccauugaaaauaauggcaaagaucguaauuacuuuugaaccaucccaauaa	102	mml-miR-548b-25-5p	46098331	46098353	gugcaaaaguaauugugguuuug	mml-miR-548b-25-3p	46098375	46098396	gaucguaauuacuuuugaacca
yes				mml-miR-548b-26	CM002979.2	+	27286498	27286646	uagaccacaggacuugaguaauuuagguaucuuauuauuagguuggugcaaaaguaauugugguuuugccacuaaaaauaauggcaaaagcagaaauuauuuuuacaccaacuaauaauuaaaauuguuuuauuugcucuuauacauaa	149	mml-miR-548b-26-5p	27286543	27286565	gugcaaaaguaauugugguuuug	mml-miR-548b-26-3p	27286584	27286607	aaagcagaaauuauuuuuacacca
yes				mml-miR-548b-27	CM002978.2	+	71569852	71569951	caaucagguauauuagguuggugcaaaaguaauugugguuuuggucuuaaaaaguaauagugaaaaccgcaguuacuuuugcacaaaccuaacaaauccc	100	mml-miR-548b-27-5p	71569872	71569894	gugcaaaaguaauugugguuuug	mml-miR-548b-27-3p	71569916	71569938	aaccgcaguuacuuuugcacaaa
yes				mml-miR-548b-28	CM002979.2	-	19120505	19120653	uucagaacauauuuuuaauuucacaauuauuauuagguugaugcaaaaguaauugugguuuugccacuuacuuucauugaauuacuuucaaaaccacuguuacuuuugcaccaaccuaauaguauugugaucaaauucuuuauacucuc	149	mml-miR-548b-28-5p	19120546	19120567	ugcaaaaguaauugugguuuug	mml-miR-548b-28-3p	19120595	19120617	aaaccacuguuacuuuugcacca
yes				mml-miR-548b-29	CM002988.2	+	3086760	3086908	ugauaagaauauggcaauuauuggaguagaugaauuaauauuagguugaugcaaaaguaauugugguuuugcaauuaaaagucauggcaaaaacagcaauuacguuugcacagaccuaauacuucauuuagcagugucgucaaauuuua	149	mml-miR-548b-29-5p	3086809	3086830	ugcaaaaguaauugugguuuug	mml-miR-548b-29-3p	3086849	3086873	aaaacagcaauuacguuugcacaga
yes				mml-miR-548b-30	CM002986.2	-	87236182	87236280	guuaauauuuggcuggugcaaaaguaauugugguuuugcuauuaagaguaauuaaaagucauggcaaaaacugugauaacuuuuguaccaaccuaguaa	99	mml-miR-548b-30-5p	87236197	87236219	gugcaaaaguaauugugguuuug	mml-miR-548b-30-3p	87236249	87236271	aaacugugauaacuuuuguacca
yes				mml-miR-548b-31	CM002990.2	-	68701638	68701786	ucggugguucauucuguucaguguuuauuucaguauuagguuggugcaaaaguaauugugguuuugccauuauauucauggaaggaaccauaauuacuuuugugccaaacuaauaaauuauuuuucuucugcuagcuuuggaguuacuu	149	mml-miR-548b-31-5p	68701681	68701703	gugcaaaaguaauugugguuuug	mml-miR-548b-31-3p	68701724	68701744	accauaauuacuuuugugcca
yes				mml-miR-548b-33	CM002995.2	+	63310448	63310596	aaaaucuucucccauccuuaucuuaagaaguauuagguuggugcaaaaguaauugugguuuugccauuaaaaguaaugacaaaaauagcaauuacguuugcaacaaccugacauauuuugaaaaagcacaaccccaucuacaguuaaac	149	mml-miR-548b-33-5p	63310488	63310510	gugcaaaaguaauugugguuuug	mml-miR-548b-33-3p	63310529	63310551	aaaauagcaauuacguuugcaac
yes				mml-miR-548b-34	CM002993.2	+	30945541	30945689	aaauuacacacacaaauuucaccuauuuuauucuucuuuuuccaauuguuucaguucuauuagguuggugcaaaaguaauugugguuuugccauuaaaaaaugacaaaaagcacaauuacuuuugcagcaacuuaguagcuccuuggcc	149	mml-miR-548b-34-5p	30945608	30945630	gugcaaaaguaauugugguuuug	mml-miR-548b-34-3p	30945647	30945670	aaaagcacaauuacuuuugcagca
yes				mml-miR-548b-35	CM002997.3	-	124476406	124476504	ugaaauuuuuaaauuacuauuagguuggugcaaaaguaauugugguuuugccacuuaaaguaauggcaaaaacugcaauuucuuuugcaccaaucuaac	99	mml-miR-548b-35-5p	124476433	124476455	gugcaaaaguaauugugguuuug	mml-miR-548b-35-3p	124476475	124476497	aaacugcaauuucuuuugcacca
yes				mml-miR-548b-36	CM002984.2	+	29918824	29918922	acaugauguauauauuagguuuagugcaaaaguaauugugguuuugcauuaaagugauacaaaaacugcaaugacuuuugcagcaaccuaguaaguacu	99	mml-miR-548b-36-5p	29918847	29918869	gugcaaaaguaauugugguuuug	mml-miR-548b-36-3p	29918887	29918909	aacugcaaugacuuuugcagcaa
yes				mml-miR-548b-37	CM002984.2	+	61194501	61194599	aggagguuucuauuagguuggugcaaaaguaauugugguuuuguauaacuuuuaauggcaaaaaugcaauuacuuuugcgccaaccuaacagaauuuua	99	mml-miR-548b-37-5p	61194521	61194543	gugcaaaaguaauugugguuuug	mml-miR-548b-37-3p	61194561	61194583	aaaaugcaauuacuuuugcgcca
yes				mml-miR-548b-38	CM002983.2	-	76002514	76002662	agacaaacuuuaucaagcuuuaagaggucgauauagguuggugcaaaaguaauugugguuuugcaauuaaagcaauggcaaaaaccacaaguacuuuuguaccaaccuauaauuccuucaaaucuaagccucugcaaccaaucaaaagg	149	mml-miR-548b-38-5p	76002554	76002576	gugcaaaaguaauugugguuuug	mml-miR-548b-38-3p	76002595	76002617	aaaccacaaguacuuuuguacca
yes				mml-miR-548b-39	CM002993.2	+	30945541	30945689	aaauuacacacacaaauuucaccuauuuuauucuucuuuuuccaauuguuucaguucuauuagguuggugcaaaaguaauugugguuuugccauuaaaaaaugacaaaaagcacaauuacuuuugcagcaacuuaguagcuccuuggcc	149	mml-miR-548b-39-5p	30945608	30945630	gugcaaaaguaauugugguuuug	mml-miR-548b-39-3p	30945647	30945670	aaaagcacaauuacuuuugcagca
		yes	ENSMMUT00000049146	mml-mir-548b-40	CM002983.2	-	63506116	63506206	uagcuauuagauugguacaaaaguaauugugcuuuuggccuuuacuuucaauggcaaaaaccucaauuacuuuuguaccaaccuaauauuu	91	mml-mir-548b-40-5p	63506134	63506155	aaaaguaauugugcuuuuggcc	mml-mir-548b-40-3p	63506170	63506191	caaaaaccucaauuacuuuugu
		yes	ENSMMUT00000049208	mml-mir-548b-41	CM002978.2	-	64920462	64920543	uauuagguugaugcaaaagcuauugugguuuuugccaucaaaaguaauggcaaaaaccucaauuacuuuugcaccagucuaa	82	mml-mir-548b-41-5p	64920477	64920497	aaagcuauugugguuuuugcc	mml-mir-548b-41-3p	64920512	64920532	caaaaaccucaauuacuuuug
		yes	ENSMMUT00000050377	mml-mir-548b-42	CM002994.2	+	23212296	23212381	uagguuggugcaaaaguaauugugguuuuugccguuaacuuuuaauggcaaaaaccucaauuacuuuugcaccaacuaauauauuu	86	mml-mir-548b-42-5p	23212308	23212328	aaaguaauugugguuuuugcc	mml-mir-548b-42-3p	23212344	23212364	caaaaaccucaauuacuuuug
		yes	ENSMMUT00000069234	mml-mir-548b-43	CM002982.3	+	150459948	150460048	uaguagguuggugcaaaaguaauugugguuuuugacauuaccaaaauuuuuuccuauuacaauaccaaaaaccucaauuacuuuugcaccacccuaauacu	101	mml-mir-548b-43-5p	150459963	150459983	aaaguaauugugguuuuugac	mml-mir-548b-43-3p	150460013	150460033	caaaaaccucaauuacuuuug
		yes	ENSMMUT00000069847	mml-mir-548b-44	CM002977.3	-	144248598	144248681	uuagguuggugcaaaaguaauugcgguuuuugccauuacuuuuaguugcaaaaaccucaauuacuuuuacaccaaccuaauauu	84	mml-mir-548b-44-5p	144248612	144248632	aaguaauugcgguuuuugcca	mml-mir-548b-44-3p	144248646	144248666	caaaaaccucaauuacuuuua
		yes	ENSMMUT00000049789	mml-miR-548b-45	CM002985.3	+	118505565	118505659	agauuguauuagguugguacaaaagcaaucgugguuuuugcuguuacuuuuaauggcaaaaaccgcaaucacuuucgcaccaaccuaauaaauuu	95	mml-miR-548b-45-5p	118505583	118505604	acaaaagcaaucgugguuuuug	mml-miR-548b-45-3p	NA	NA	NA
	yes	yes	ENSMMUT00000048563	mml-mir-548c	CM002983.2	-	132101210	132101304	ugugauguauuagguugaugcaaaaguaauugggguuuuuugucauuaaaaguagugacaaaaccggcaauuacuucugcaccaaacuaauauaa	95	mml-mir-548c-5p	NA	NA	NA	mml-mir-548c-3p	132101268	132101289	caaaaccggcaauuacuucugc
		yes	ENSMMUT00000073421	mml-miR-548c-1	CM002981.2	+	157411924	157412033	auuugguuggugcaaaaguaauugcagguuuugucauuacuuuuaauuaaaaguaaguaacauuauuuuuaauggcaaaaaccacaauuauuuuugcaccaaccuaacac	110	mml-miR-548c-1-5p	157411935	157411956	gcaaaaguaauugcagguuuug	mml-miR-548c-1-3p	157412002	157412023	aaaccacaauuauuuuugcacc
yes		yes	ENSMMUT00000067186	mml-miR-548d	CM002986.2	-	5519929	5520028	aggaaagguagguuuuaugaaauauuagguuggugcaaaagucaucacgguuuuugccauuaaaaccgcgaugauuuuugcacccaccuuaauagaacca	100	mml-miR-548d-5p	5519961	5519980	gugcaaaagucaucacgguu	mml-miR-548d-3p	5519994	5520013	ccgcgaugauuuuugcaccc
	yes	yes	ENSMMUT00000048434	mml-mir-548d	CM002985.3	-	122550839	122550935	aaacaaguuguauuagguuggugcaaaaguaauugugguucuugccuauaaaaguaauggcaaaaaccacaauuucuuuugcaccaaacuaauaaag	97	mml-mir-548d-5p	122550897	122550918	ggcaaaaaccacaauuucuuuu	mml-mir-548d-3p	122550899	122550920	caaaaaccacaauuucuuuugc
yes				mml-miR-548d-1	CM002980.3	-	66280249	66280350	gggcucuaaauaucaagucagugcaaaaguaauugugguuuuugccauuacuucuaaugacaaaaaccacauuacuuuugcacuaaccuaauacuuuuccca	102	mml-miR-548d-1-5p	66280273	66280293	aaaaguaauugugguuuuugc	mml-miR-548d-1-3p	66280311	66280329	aaaaccacauuacuuuugc
yes				mml-miR-548d-2	JSUE03160848.1	-	431	531	uagauuuaaacauuaggcuaguguaaaaguaauugugguuuuugccguuacuuuugauggcaaaacugcaauuguuuugcaccaaccuaauaacauuucug	101	mml-miR-548d-2-5p	455	476	aaaaguaauugugguuuuugcc	mml-miR-548d-2-3p	491	510	caaaacugcaauuguuuuug
yes				mml-miR-548d-3	CM002983.2	-	26556307	26556458	uuugugggauuuuacugcaagcuagugaauuauauaaauauaaagguuggugcaaaaguaauugugguuuuugccuuuacuuuaauggcaaaaaccgcaauuacuuuugcaugaaccuaaauauuuucaugaaagaauguggcucugauaau	152	mml-miR-548d-3-5p	26556360	26556381	aaaaguaauugugguuuuugcc	mml-miR-548d-3-3p	26556395	26556416	caaaaaccgcaauuacuuuugc
yes				mml-miR-548d-4	CM002981.2	-	18030998	18031199	cucaggggaagugagcaagucaagagggcuucacaauccuguucccucuagucccuuauauuagguuggugcaaaaguaauugugguuuuugccaguacuuuuaaugccaaaggccacauuuacuuuugcaccaaccuuaauaaagggacuagagggaacuggcuuaggaccuucuuuccuucugccccuucaccaugugag	202	mml-miR-548d-4-5p	18031070	18031091	aaaaguaauugugguuuuugcc	mml-miR-548d-4-3p	18031107	18031127	aaaggccacauuuacuuuugc
yes		yes	ENSMMUT00000065004	mml-miR-548d-6	CM002981.2	-	106276718	106276869	uguguugacaaagguuuucauuucucuuuaguauuagguuggugcaaaaguaauugugguuuuugccauugaaaaugaugacaaagaacuacaguuacuuuugcaucaacuuaauagauaacuaggaguggaaugacuguguucuaugacaa	152	mml-miR-548d-6-5p	106276763	106276784	aaaaguaauugugguuuuugcc	mml-miR-548d-6-3p	106276802	106276821	agaacuacaguuacuuuugc
yes				mml-miR-548d-7	CM002982.3	-	3577883	3577955	auuagguuggugcaaaaguaauugugguuuuugccauuacuuuugaugacaaaaccugaaauuacuuuugcac	73	mml-miR-548d-7-5p	3577896	3577917	aaaaguaauugugguuuuugcc	mml-miR-548d-7-3p	3577933	3577953	aaaaccugaaauuacuuuugc
yes				mml-miR-548d-8	CM002982.3	-	142162271	142162422	ggcauccaugaggaaauggacuggucucauuuuuaucauagguuggugcaaaaguaauugugguuuuugccuuuaacgguaaaaacugcaauaacuuuugcaccaaccuaauauuaggacugugauugaugguuaauggaguaauggaaucc	152	mml-miR-548d-8-5p	142162320	142162341	aaaaguaauugugguuuuugcc	mml-miR-548d-8-3p	142162350	142162371	uaaaaacugcaauaacuuuugc
yes		yes	ENSMMUT00000048940	mml-miR-548d-9	CM002982.3	-	143396900	143397001	aaaguuuguuuuagguuggugaaaaaguaauugugguuuuugccauugaaaauaauaacaaaaaaacacauuuacuuuugcaccaacccaauauguagauuu	102	mml-miR-548d-9-5p	143396922	143396943	aaaaguaauugugguuuuugcc	mml-miR-548d-9-3p	143396960	143396981	aaaaaacacauuuacuuuugca
yes				mml-miR-548d-10	JSUE03228753.1	-	417	568	acuuguguucugccuuuuaaauauuaaguuggugcaaaaguaauugugguuuuugccauuacuuuaaauggcaacaauuacuuuaaauggcaaaaaccacaauuacuuucaaugacuuuugcaccaaccuaaauacuuagaagcuaacuagu	152	mml-miR-548d-10-5p	452	472	aaaaguaauugugguuuuugc	mml-miR-548d-10-3p	508	528	aaaaaccacaauuacuuucaa
yes				mml-miR-548d-11	CM002992.3	-	8899772	8899872	uagaggcuuuuauauuagguuggcccaaaaguaauugugguuuuugcauaacuuaauggcaaaaccacaauuaguuuacaacaaacuaguaguauacucug	101	mml-miR-548d-11-5p	8899798	8899818	aaaaguaauugugguuuuugc	mml-miR-548d-11-3p	8899832	8899851	aaaaccacaauuaguuuaca
yes				mml-miR-548d-12	CM002989.3	+	119767995	119768146	uagagccauguauaaucacggaugguuuggaggaaacuauuagguugguucaaaaguaauugugguuuuugccauugaaaguaaugcaaaacugcaauuacauuuacuccaaccuaauaacucauuauuugaacaaaacugaaaguggaucc	152	mml-miR-548d-12-5p	119768046	119768066	aaaaguaauugugguuuuugc	mml-miR-548d-12-3p	119768082	119768102	aaaacugcaauuacauuuacu
yes				mml-miR-548d-13	CM002979.2	-	24697610	24697761	aacaauuuuuuaaguuggcaaacaucaaauuauuagguuggugcaaaaguaauugugguuuuugccauuaaaaguaaugccaaaaucugcaauuacuuuugcaucagccuaauaccagugugucauuguguucaaaauuucaauuaguuguu	152	mml-miR-548d-13-5p	24697654	24697674	aaaaguaauugugguuuuugc	mml-miR-548d-13-3p	24697692	24697712	aaaucugcaauuacuuuugca
yes				mml-miR-548d-14	CM002979.2	-	53147722	53147923	auaccuaucacauuuucuuuauucauucaccuguugauggguacagguugugucuauggguuagugcaaaaguaauugugguuuuugccauuauuuuaauugcagcaaaaguaaugguaaaaacugcaauuacauuugcagcaaccuaauaugucuugguucucauaaauaaugcugaaaugaacacggaagugcagguaua	202	mml-miR-548d-14-5p	53147789	53147810	aaaaguaauugugguuuuugcc	mml-miR-548d-14-3p	53147839	53147859	uaaaaacugcaauuacauuug
yes				mml-miR-548d-15	CM002979.2	+	89438979	89439080	cuuuuuauuagguuggugcaaaaguaauugugguuuuugccauuacuuuuaaugggaaacaccgcaauuacuaaucuuccguuugucacaggacuuuaaaac	102	mml-miR-548d-15-5p	89438998	89439019	aaaaguaauugugguuuuugcc	mml-miR-548d-15-3p	89439035	89439055	aaacaccgcaauuacuaaucu
yes				mml-miR-548d-16	CM002988.2	+	82978330	82978531	agaguuuuccugguguucuugaugguaguuguugugcacagaaaauauuauaguugguucaaaaguaauugugguuuuugccauugugcaaaaauaauugcaguuuugccauugcuuucagugguuuuugaaacuacaauuauuuuugcacugaccugauaaaauuugcaacuacuuuaacauuugaaacaaaccuuggcuu	202	mml-miR-548d-16-5p	82978390	82978411	aaaaguaauugugguuuuugcc	mml-miR-548d-16-3p	82978459	82978479	gaaacuacaauuauuuuugca
yes				mml-miR-548d-18	JSUE03274649.1	+	7632	7730	aggcaggcuuuguauuaggauggugcaagaguaauugugguuuuugccaucaaaaguacugucaaaaaucgcaauuacuuuugcaccaagcuaauagua	99	mml-miR-548d-18-5p	7659	7680	agaguaauugugguuuuugcca	mml-miR-548d-18-3p	7694	7714	caaaaaucgcaauuacuuuug
yes				mml-miR-548d-19	CM002994.2	-	37645582	37645731	aggguacaaaguuccuguuuuccaugaaguuauuaggugggugcaaaaguaauugugguuuuugcuguuaaguaauggcaaaaccacaauuacuuuugcauaaaucuaauacauucuccgggagggagacagagaaaagaacugaauuca	150	mml-miR-548d-19-5p	37645626	37645646	aaaaguaauugugguuuuugc	mml-miR-548d-19-3p	37645661	37645681	aaaaccacaaauuacuuuugc
yes				mml-miR-548d-20	CM002994.2	-	62832785	62832886	uuuggucucuuaggucagugcaaaaguaauugugguuuuugccaugaaaagugauggcaaaaaaacaauauuacuuuugcaccaaccuaauacuuucuaaag	102	mml-miR-548d-20-5p	62832806	62832827	aaaaguaauugugguuuuugcc	mml-miR-548d-20-3p	62832842	62832863	caaaaaaacaauauuacuuuug
yes				mml-miR-548d-21	CM002990.2	-	28891164	28891365	uaguuaaauguauuaaacaaacaugcaccaaguaguugucauaacuacuuguuuggugcaaaaguaauugugguuuuugccauuacuuuuaaugauacaaaugguacuuuuaauugaaagcaagggcaaaaaccaccguuacuuuugcacuaaccuaauauaaugugucaacuacucuugauuuuugaaauaguuuugcuga	202	mml-miR-548d-21-5p	28891223	28891244	aaaaguaauugugguuuuugcc	mml-miR-548d-21-3p	28891290	28891311	caaaaaccaccguuacuuuugc
yes				mml-miR-548d-22	CM002990.2	+	46312052	46312153	cuucaacauauauagguuggugcaaaaguaauugugguuuuugccauugaaaguaauugaaaaaaacgcaauaacuuuugcaccaaccuaauaauuugggga	102	mml-miR-548d-22-5p	46312075	46312096	aaaaguaauugugguuuuugcc	mml-miR-548d-22-3p	46312113	46312132	aaaaacgcaauaacuuuugc
yes				mml-miR-548d-23	CM002990.2	-	71522066	71522217	ccacguggacccuugaagucuccuguuuugcuauuaguuggugcaaaaguaauugugguuuuugccauuuaaaaguaauggcaaaagccacaauaauuuuugcaccaaccuaauacauacagagguugagauacugccaagccccaaaaguu	152	mml-miR-548d-23-5p	71522110	71522131	aaaaguaauugugguuuuugcc	mml-miR-548d-23-3p	71522147	71522168	caaaagccacaauaauuuuugc
yes				mml-miR-548d-24	CM002990.2	-	79526103	79526254	auguggggacauuuuuaucagguuggugcaaaaguaauugugguuuuugccaugaaaaguuauggcaauuuuuaaauguugucauuaauaguaauggugaauaccacaauuacuuuugcaccaauauaauagaauguucauucaaccuauaa	152	mml-miR-548d-24-5p	79526132	79526153	aaaaguaauugugguuuuugcc	mml-miR-548d-24-3p	79526200	79526221	ugaauaccacaauuacuuuugc
yes				mml-miR-548d-25	CM002997.3	-	1722838	1723039	ugcaaaaguaauugugguuuuugccauuaaaaguaauggcaacauagcaagacugugucucuacaaaaaaaaaaaaaaagguaaaagauuggcugagagccaccacacucagcuaauuuuuuuuuuguacauuuuuuguagacacgaggucuugcuauguugcuauuacuuuuaauggcauaaacugcaguuaguuuugcac	202	mml-miR-548d-25-5p	1722841	1722862	aaaaguaauugugguuuuugcc	mml-miR-548d-25-3p	1723012	1723033	auggcauaaacugcaguuaguu
		yes	ENSMMUT00000059259	mml-mir-548d-28	CM002982.3	-	35121984	35122078	gagaaguuugcuauuagguuggugcaaaaguaacugugguuucugccauuaaaaguauggcaaaaaccacaauuacuuuugcacuaaccuaauaa	95	mml-mir-548d-28-5p	35122009	35122030	aaaaguaacugugguuucugcc	mml-mir-548d-28-3p	35122044	35122065	caaaaaccacaauuacuuuugc
		yes	ENSMMUT00000060812	mml-mir-548d-29	CM002983.2	-	16767895	16767974	uauuauguuggugcaaaaguaauugugauuuugccauuacuuucaauggcaaaaaccacaauuacuuuugcaccaaccca	80	mml-mir-548d-29-5p	16767908	16767929	caaaaguaauugugauuuugcc	mml-mir-548d-29-3p	16767944	16767965	caaaaaccacaauuacuuuugc
		yes	ENSMMUT00000049124	mml-mir-548d-30	CM002983.2	-	3673384	3673478	acaauauacuauuagguuggugcaaaaguaauugugguuuuugcuacuaaaauaauggcaaaaacaacaauuucuuuuacaccaaccuauacaaa	95	mml-mir-548d-30-5p	3673408	3673429	aaaguaauugugguuuuugcua	mml-mir-548d-30-3p	3673440	3673461	ggcaaaaacaacaauuucuuuu
		yes	ENSMMUT00000077171	mml-mir-548d-31	CM002984.2	-	158837594	158837683	uauuaggcugguacgagagcaauugagguuuuugccacuacuuuuauggcaaaaaccacaauuacuuuugcaccaaucugauacugauuu	90	mml-mir-548d-31-5p	158837608	158837629	gagagcaauugagguuuuugcc	mml-mir-548d-31-3p	158837643	158837664	caaaaaccacaauuacuuuugc
		yes	ENSMMUT00000051714	mml-mir-548d-32	CM002980.3	-	849321	849405	auuaaagguuggugcaaaaguuauugugguuuuugccauugaaaguaauggcaaaaaccacaauuacuuuugcaccaaccuaaua	85	mml-mir-548d-32-5p	849336	849357	aaaaguuauugugguuuuugcc	mml-mir-548d-32-3p	849372	849393	caaaaaccacaauuacuuuugc
		yes	ENSMMUT00000075959	mml-mir-548d-33	CM002986.2	-	46820254	46820340	uuauuuuagguuggugcaaaaguaguugugguuuuugccauuacuuucaaaggcaaaaaccacaauuacuuuugcaccaaccuaaau	87	mml-mir-548d-33-5p	46820271	46820292	aaaaguaguugugguuuuugcc	mml-mir-548d-33-3p	46820307	46820328	caaaaaccacaauuacuuuugc
		yes	ENSMMUT00000055002	mml-mir-548d-34	CM002979.2	-	17457649	17457735	uuuuauuagguuguugcaaaaguaauuguggcuuuugcuaucaccuucaauggcaaaaaccacaauuacuuuugcaccagccuaacu	87	mml-mir-548d-34-5p	17457666	17457687	aaaaguaauuguggcuuuugcu	mml-mir-548d-34-3p	17457702	17457723	caaaaaccacaauuacuuuugc
		yes	ENSMMUT00000049248	mml-mir-548d-35	CM002989.3	-	30406128	30406207	aucagguuggugcaaaaauaauugugguuuuugccauuacuuucgauggcaaaaaccacaauuacuuuugcagcaaccua	80	mml-mir-548d-35-5p	30406141	30406162	aaaaauaauugugguuuuugcc	mml-mir-548d-35-3p	30406177	30406198	caaaaaccacaauuacuuuugc
		yes	ENSMMUT00000066166	mml-mir-548d-36	CM002992.3	-	71787003	71787089	uauuagauuggugcaaacguaauaguaguuuuugccaucacuuuuaauggcaaaaaccacaauuacuuuugcaccaaccugaaauau	87	mml-mir-548d-36-5p	71787017	71787038	aaacguaauaguaguuuuugcc	mml-mir-548d-36-3p	71787053	71787074	caaaaaccacaauuacuuuugc
		yes	ENSMMUT00000051654	mml-mir-548d-37	CM002977.3	-	21521172	21521260	uucuacuagauuggugcaaaaguaauucugguuuuugccauuacuuucaaaggcaaaaaccacaauuacuuuugcaccaaccuaauacu	89	mml-mir-548d-37-5p	21521189	21521210	aaaaguaauucugguuuuugcc	mml-mir-548d-37-3p	21521225	21521246	caaaaaccacaauuacuuuugc
		yes	ENSMMUT00000067885	mml-mir-548d-38	CM002977.3	-	4936110	4936198	guauuagauuggugcaaaaguaauugcgguuuuugccauuacuuucaaaggcaaaaaccacaauuacuuuugcaccaaccuauauuuaa	89	mml-mir-548d-38-5p	4936125	4936146	aaaaguaauugcgguuuuugcc	mml-mir-548d-38-3p	4936161	4936182	caaaaaccacaauuacuuuugc
		yes	ENSMMUT00000049275	mml-mir-548d-39	CM002997.3	-	130842384	130842472	uaaguuggugcaaaaguaauugcgauuuuguaguugaaaggaauugcaaaaaccacaauuacuuuugcaccaaccuaauaaauccaaau	89	mml-mir-548d-39-5p	130842394	130842415	caaaaguaauugcgauuuugua	mml-mir-548d-39-3p	130842430	130842451	caaaaaccacaauuacuuuugc
		yes	ENSMMUT00000049271	mml-mir-548d-40	CM002984.2	-	58338023	58338113	aauauauuagguuggugcaaaaguaauugugguuuuugccauuaaaaguaauagcaaaaaccacaauugcuuuugcaccaaccuaauuaaa	91	mml-mir-548d-40-5p	58338042	58338063	aaaguaauugugguuuuugcca	mml-mir-548d-40-3p	58338077	58338098	caaaaaccacaauugcuuuugc
		yes	ENSMMUT00000057830	mml-mir-548d-41	CM002993.2	-	47057731	47057818	auauuuuaguuugcugcauaaguaauugcgguuuuugcuguuacuuuaguagcaaaaaccacaauuacuuuuacaccaaccuaauagu	88	mml-mir-548d-41-5p	47057748	47057769	auaaguaauugcgguuuuugcu	mml-mir-548d-41-3p	47057783	47057804	caaaaaccacaauuacuuuuac
		yes	ENSMMUT00000049833	mml-mir-548d-42	CM002988.2	-	6120839	6120922	uuuauuagguuggugcaaaaguaauuguggauuuugccauuacuuuuaauugcaaaaaccacaauuacuuuugcaccaaccuaa	84	mml-mir-548d-42-5p	6120855	6120876	aaaaguaauuguggauuuugcc	mml-mir-548d-42-3p	6120891	6120912	caaaaaccacaauuacuuuugc
		yes	ENSMMUT00000053217	mml-mir-548d-43	CM002977.3	-	145037135	145037222	uauuauuagguuagugcaaaaguaauugcgguuuuugccauuacuuucaauagcaaaaaccacaauuacuuuugcaccaaccuauaau	88	mml-mir-548d-43-5p	145037152	145037173	aaaaguaauugcgguuuuugcc	mml-mir-548d-43-3p	145037188	145037209	caaaaaccacaauuacuuuugc
		yes	ENSMMUT00000049580	mml-mir-548d-44	CM002985.3	+	83579251	83579321	aggcuggugcaaaaguaauugugguuuuugcaauuuaaucacaaaaaccacaauuacuuuugcacuaaccu	71	mml-mir-548d-44-5p	83579261	83579282	aaaaguaauugugguuuuugca	mml-mir-548d-44-3p	83579292	83579313	caaaaaccacaauuacuuuugc
		yes	ENSMMUT00000049812	mml-mir-548d-45	CM002982.3	+	108975081	108975166	uauuagguuggugaaaaaguaauugagguuuuugucauacuuuuaauggccaaaaaccacaauuacuuuugcaccaaccuaaaaua	86	mml-mir-548d-45-5p	108975094	108975115	aaaaaguaauugagguuuuugu	mml-mir-548d-45-3p	108975131	108975152	caaaaaccacaauuacuuuugc
		yes	ENSMMUT00000048713	mml-mir-548d-46	CM002978.2	-	78197781	78197866	uauuagguuggugcaaaaguuacugugguuuuugccaauacuuuuaaugucaaaaaccacaauuacuuuugcacaaaccuaauauu	86	mml-mir-548d-46-5p	78197795	78197816	aaaaguuacugugguuuuugcc	mml-mir-548d-46-3p	78197831	78197852	caaaaaccacaauuacuuuugc
		yes	ENSMMUT00000065444	mml-mir-548d-47	CM002979.2	-	99302815	99302908	agaaguauuagguugaugcaaaaguaauugugguuucugcaguuacuuuuaaugacaaaaaccacaauuacuuuugcaccaacuuaauauaucu	94	mml-mir-548d-47-5p	99302835	99302856	aaaguaauugugguuucugcag	mml-mir-548d-47-3p	99302870	99302891	caaaaaccacaauuacuuuugc
		yes	ENSMMUT00000077402	mml-mir-548d-48	CM002977.3	-	212421858	212421953	agaauucauuauuagguuggcaccaaaguaauuguggcuuuuugccauucaaaguaauaacaaaaaccacaauuacuuuugcaucaguuuaugaaa	96	mml-mir-548d-48-5p	212421884	212421905	aguaauuguggcuuuuugccau	mml-mir-548d-48-3p	212421918	212421939	caaaaaccacaauuacuuuugc
		yes	ENSMMUT00000049739	mml-mir-548d-49	CM002979.2	+	6837632	6837721	cauaaucuauuagguucgugcaaaaguaaucacaguuuuugcuauuacuuuuauggcaaaaaccacgauuacuuuugcaccaaccgaaua	90	mml-mir-548d-49-5p	6837655	6837676	aaguaaucacaguuuuugcuau	mml-mir-548d-49-3p	6837686	6837707	ggcaaaaaccacgauuacuuuu
		yes	ENSMMUT00000054370	mml-mir-548d-50	CM002985.3	-	117608574	117608658	uuagauuggugcaaaaguaauugcgguuuuuaccauuaaaaauaauggcaaaaaccacaguuacuuuugcaccaaccuaauauaa	85	mml-mir-548d-50-5p	117608588	117608609	aaguaauugcgguuuuuaccau	mml-mir-548d-50-3p	117608620	117608641	ggcaaaaaccacaguuacuuuu
		yes	ENSMMUT00000049551	mml-mir-548d-51	CM002982.3	-	35287634	35287729	acagaaaauauuuagguuggugcaaaaguaacugcaguuuuugcuacugaaagucauggcaaaaaccacaguuacuuuugugccagccuauuaaaa	96	mml-mir-548d-51-5p	35287660	35287681	aguaacugcaguuuuugcuacu	mml-mir-548d-51-3p	35287691	35287712	ggcaaaaaccacaguuacuuuu
		yes	ENSMMUT00000077456	mml-mir-548d-52	CM002977.3	-	180646514	180646592	uagguucauggaaaaguaacuguaguuuuugccauuacuuucaauggcaaaaaccacaguuacuuuugcaccaaccuaa	79	mml-mir-548d-52-5p	180646527	180646548	aaguaacuguaguuuuugccau	mml-mir-548d-52-3p	180646559	180646580	ggcaaaaaccacaguuacuuuu
		yes	ENSMMUT00000064123	mml-mir-548d-53	CM002982.3	-	167682453	167682549	gaguagguauauauauuauguuggcgcaaaaauaauccugguuuuugccacaaaaaguaauugcaaaaaccacaguuacuuuugcaccaaccuaaua	97	mml-mir-548d-53-5p	167682480	167682501	aaaaauaauccugguuuuugcc	mml-mir-548d-53-3p	167682516	167682537	caaaaaccacaguuacuuuugc
		yes	ENSMMUT00000049435	mml-mir-548d-54	CM002984.2	-	44025462	44025547	guaaauauuagauuggugcaaaaguaauugugguuuuugccauuaaaaguacgggcaaaaccacaauugcuuuugcaccaaccuaa	86	mml-mir-548d-54-5p	44025482	44025503	aaaguaauugugguuuuugcca	mml-mir-548d-54-3p	44025516	44025537	gcaaaaccacaauugcuuuugc
		yes	ENSMMUT00000049577	mml-mir-548d-55	CM002985.3	-	15193088	15193173	cagcuauuugauuggugcaaaaguaauugcgguuuuugccauuacuuuaauugcaaaaaccacaauaacuuuugcacgaaccuaau	86	mml-mir-548d-55-5p	15193107	15193128	aaaguaauugcgguuuuugcca	mml-mir-548d-55-3p	15193141	15193162	caaaaaccacaauaacuuuugc
		yes	ENSMMUT00000049918	mml-mir-548d-56	CM002981.2	-	156588072	156588158	agguauuagguuggugcaaaaguaauugagauuuuucccauuaaaaguaauugcaaaaaccacaauaacuuuugcaccaauguaaua	87	mml-mir-548d-56-5p	156588090	156588111	aaaguaauugagauuuuuccca	mml-mir-548d-56-3p	156588125	156588146	caaaaaccacaauaacuuuugc
		yes	ENSMMUT00000063023	mml-mir-548d-57	CM002977.3	+	217659176	217659276	augacuacuacuagguugcugcaaauguaacugugguuuuugcaaugaaaaguaaugacaaaaaccacaaucacuuuugcaccaacuaguguuagcaaugc	101	mml-mir-548d-57-5p	217659198	217659219	aaauguaacugugguuuuugca	mml-mir-548d-57-3p	217659234	217659255	caaaaaccacaaucacuuuugc
		yes	ENSMMUT00000069300	mml-mir-548d-58	CM002985.3	-	94238098	94238186	uauuauuagguuggugcaaaaguaauugugguuguugccauuacuuucaauggcaaaaaccacaauaacuuuugcaccaaccuaauauu	89	mml-mir-548d-58-5p	94238115	94238136	aaaaguaauugugguuguugcc	mml-mir-548d-58-3p	94238151	94238172	caaaaaccacaauaacuuuugc
		yes	ENSMMUT00000070320	mml-mir-548d-59	CM002985.3	+	11852237	11852336	cuauuagguuggugcaaaaguaauugugguuuuugccauuaguuuaaauuaccuuuaauggcaaaaaccacaaucacuuuugcaccaaccuaauagauug	100	mml-mir-548d-59-5p	11852252	11852273	aaaaguaauugugguuuuugcc	mml-mir-548d-59-3p	11852298	11852319	caaaaaccacaaucacuuuugc
		yes	ENSMMUT00000071063	mml-mir-548d-60	CM002990.2	-	91056165	91056253	uauuagguuguugcaaaacuaauugcgguuuuugccauuacguucaacaguaaaaaccacaauaacuuuugcaccaaccuauaauacau	89	mml-mir-548d-60-5p	91056179	91056200	aaaacuaauugcgguuuuugcc	mml-mir-548d-60-3p	91056215	91056236	uaaaaaccacaauaacuuuugc
		yes	ENSMMUT00000060987	mml-miR-548d-61	CM002997.3	+	100639935	100640017	cauuagguuggugcaaaaggauuugugguuuuugccuguaaaaguaauggcaaaaaccgcaauuccuuuugcaccaaccuaau	83	mml-miR-548d-61-5p	100639949	100639970	aaaaggauuugugguuuuugcc	mml-miR-548d-61-3p	100639983	100640004	ggcaaaaaccgcaauuccuuuu
		yes	ENSMMUT00000049054	mml-miR-548d-62	CM002984.2	-	162561292	162561380	auguauuagauugaggcaaaaguaauugccauuuuugcaauugaaaguaauggcaaaaaccacaauuacuuucgcaccaaccuaauaga	89	mml-miR-548d-62-5p	NA	NA	NA	mml-miR-548d-62-3p	162561343	162561363	ggcaaaaaccacaauuacuuu
		yes	ENSMMUT00000049075	mml-miR-548d-63	CM002980.3	-	17170712	17170798	aguuauuuagguuggugcaaaaguaaauguggcuuuugccuucaaaaguaauugcaaaaccacaauuacuuuucaccaaccugauaa	87	mml-miR-548d-63-5p	17170730	17170750	aaaaguaaauguggcuuuugc	mml-miR-548d-63-3p	17170767	17170787	aaaaccacaauuacuuuucac
		yes	ENSMMUT00000049294	mml-miR-548d-64	CM002987.3	-	54793727	54793810	uuuuauuagguugaugcaaaaguaauugauguuuuugccauuacuuucaauggcaaaaaccacaaucgcuuuugcaccaaucua	84	mml-miR-548d-64-5p	NA	NA	NA	mml-miR-548d-64-3p	54793778	54793799	ggcaaaaaccacaaucgcuuuu
		yes	ENSMMUT00000049296	mml-miR-548d-65	CM002979.2	-	94195708	94195805	uaauaacuauuaaguuggugcaaacauaauugugguuuuugucauuacuuuuaauggcaaaaacuguaauuacguuugcaccaaccuaauauuuuaau	98	mml-miR-548d-65-5p	94195727	94195748	gcaaacauaauugugguuuuug	mml-miR-548d-65-3p	NA	NA	NA
		yes	ENSMMUT00000049497	mml-miR-548d-66	CM002977.3	-	135198951	135199037	uauagguuggugcaaaaauaauugugguuuuugccauuuuaaaaguaauggcaaaaaccacaauaauguuugcaccaaccuaauaaa	87	mml-miR-548d-66-5p	135198964	135198985	aaaaauaauugugguuuuugcc	mml-miR-548d-66-3p	135199002	135199023	caaaaaccacaauaauguuugc
		yes	ENSMMUT00000051043	mml-miR-548d-67	CM002986.2	-	22966695	22966782	uauuagauuggugcaaaaguaauugccauuuuugccauuacuuucaauggcaaaaaccacaauuauuuuugcaccaaccuaauaucuu	88	mml-miR-548d-67-5p	NA	NA	NA	mml-miR-548d-67-3p	22966743	22966764	ggcaaaaaccacaauuauuuuu
		yes	ENSMMUT00000055008	mml-miR-548d-68	CM002990.2	-	41566464	41566551	aguauuaaguuguugcaaaacuaauugcgguuuuugccauugaagcuaguggcaaaaaccgcaauuucuuuugcaccaaccuaacaga	88	mml-miR-548d-68-5p	NA	NA	NA	mml-miR-548d-68-3p	41566514	41566535	ggcaaaaaccgcaauuucuuuu
		yes	ENSMMUT00000058686	mml-miR-548d-69	CM002980.3	-	88953530	88953623	cauuuaauuauuagguuggugugaaaguaauugcgguuuuugccauuacuuuuaacugcaaaaaccacaauuauuuuugcaccaacauaauacu	94	mml-miR-548d-69-5p	88953554	88953575	aaguaauugcgguuuuugccau	mml-miR-548d-69-3p	88953588	88953609	caaaaaccacaauuauuuuugc
		yes	ENSMMUT00000062437	mml-miR-548d-70	CM002984.2	-	76834931	76835057	caaacuauuagauuggugcaaaaguaauuguggguuuugccauuaaaagaaaugucaaaaaccacaauuacuuuugcaccaacccaauaucuguauccucaugucaacauaucuuagccagguccca	98	mml-miR-548d-70-5p	76834951	76834972	aaaguaauuguggguuuugcca	mml-miR-548d-70-3p	76834986	76835007	caaaaaccacaauuacuuuugc
		yes	ENSMMUT00000067239	mml-miR-548d-71	CM002994.2	-	35613459	35613555	uauguuaggauugguggaaaaguaauuguggucucacuauuacuuuuagaggcagaaaccacaauuauuuuugcaccaaccuaauacuaauuuaugu	97	mml-miR-548d-71-5p	NA	NA	NA	mml-miR-548d-71-3p	35613509	35613530	ggcagaaaccacaauuauuuuu
		yes	ENSMMUT00000070020	mml-miR-548d-72	CM002985.3	+	111480481	111480568	uauuagguuggugcaaaaguaauugugguuuugggcauuacuuuuaauggcaaaaacugcaauuacuuuuucacuaaccuaauauuca	88	mml-miR-548d-72-5p	111480493	111480514	gcaaaaguaauugugguuuugg	mml-miR-548d-72-3p	111480534	111480555	aaacugcaauuacuuuuucacu
		yes	ENSMMUT00000074142	mml-miR-548d-73	CM002982.3	+	150207269	150207360	uguauuagguugaugcaaaaguaauugugguuuuuuccauuauuuuuaauagcaaaaacugcaauuacuuuuacaccaacccuaauaaaucu	92	mml-miR-548d-73-5p	150207282	150207303	ugcaaaaguaauugugguuuuu	mml-miR-548d-73-3p	150207324	150207345	aaacugcaauuacuuuuacacc
yes				mml-miR-548e	CM002997.3	+	88279943	88280144	gucucuauagaucauauaagugagaaagaaaaaugugauauauuuugaaagcuaagguauuuggguuggugcaaaaguaauugcggauuuugccauuaaaaguggcaaaaaccacaauuacuuuuguaccaaccuuauaacauacauuaauuucuaacacuuaaguauaauacauuguuagacuuacuacuaauacuaucac	202	mml-miR-548e-5p	88280015	88280036	aaaaguaauugcggauuuugcc	mml-miR-548e-3p	88280048	88280069	caaaaaccacaauuacuuuugu
yes	yes	yes	ENSMMUT00000048641	mml-mir-548e	CM002985.3	-	103261039	103261135	ccuagaauguuacuagguuggugcaaaaguaauugcgaguuuuaccauuacuuucaauggcaaaaccggcaguuacuuuugcaccaacguaauacuu	97	mml-mir-548e-5p	NA	NA	NA	mml-mir-548e-3p	103261099	103261120	caaaaccggcaguuacuuuugc
		yes	ENSMMUT00000069045	mml-mir-548e-1	CM002977.3	-	33925245	33925328	uuagauuggugcaaaaguaauugugguuuuugccauugaaaguaaugguaaaaacggcaguuacuuuugcaccaaccuaauaga	84	mml-mir-548e-1-5p	33925257	33925278	aaaaguaauugugguuuuugcc	mml-mir-548e-1-3p	33925293	33925314	uaaaaacggcaguuacuuuugc
		yes	ENSMMUT00000049388	mml-miR-548e-2	CM002985.3	+	7122667	7122781	uggcaaaaauguguugauuguaaugguuucuauuuugauuaacaaagauguguuggagccuaguuauaaugauuugaaauucaugguccaaaacugcaguuacuuuugcaccaac	115	mml-miR-548e-2-5p	NA	NA	NA	mml-miR-548e-2-3p	7122754	7122775	ccaaaacugcaguuacuuuugc
		yes	ENSMMUT00000049640	mml-miR-548e-3	CM002984.2	-	127803280	127803392	uggcaaaaauguguugauuguaaugguucuuauuuugauuaauaaacacauuugagccuaguuauaaugaucuaaaauucacgguccaaaacugcaguuacuuuugcaccaac	113	mml-miR-548e-3-5p	NA	NA	NA	mml-miR-548e-3-3p	127803365	127803386	ccaaaacugcaguuacuuuugc
yes	yes	yes	ENSMMUT00000048708	mml-mir-548f	CM002996.3	-	43286002	43286086	auuuagguuggugcaaaaguaauugcggauuuugccauugaaaguaauggccaaaaccacaguuccuuuugcaccaaucuauaga	85	mml-mir-548f-5p	NA	NA	NA	mml-mir-548f-3p	43286053	43286073	caaaaccacaguuccuuuugc
yes		yes	ENSMMUT00000072765	mml-miR-548f-1	CM002977.3	-	193216067	193216187	cuuaacacugauugcaacaacaaacauacuauuagauuggugcaaaaguaaucacaguuuuugccauuacuuucaauagcaaaaacugauuacuuuugcacuaaccuaguaacaaacaagc	121	mml-miR-548f-1-5p	193216109	193216131	caaaaguaaucacaguuuuugcc	mml-miR-548f-1-3p	193216147	193216168	aaaaacugauuacuuuugcacu
yes		yes	ENSMMUT00000058060	mml-miR-548f-12	CM002986.2	-	25162673	25162774	ccuuguaaucauaguauugaguuggugcaaaaguaaucacaguuuuuaccauuauaauggcaaaaacugggauuacuuuugcaacgacccaauaacagugac	102	mml-miR-548f-12-5p	25162698	25162719	ugcaaaaguaaucacaguuuuu	mml-miR-548f-12-3p	25162736	25162758	aaacugggauuacuuuugcaacg
yes		yes	ENSMMUT00000049377	mml-miR-548f-15	CM002997.3	-	138961106	138961206	auuuuuaaaaaacaaaauauuagauuggggaaagguaacugugguuuuugccauuaaaagugaugacaaaaacuguaauuacuuuuguaccaaccuaauag	101	mml-miR-548f-15-5p	138961136	138961157	aaagguaacugugguuuuugcc	mml-miR-548f-15-3p	138961172	138961191	caaaaacuguaauuacuuuu
		yes	ENSMMUT00000049078	mml-mir-548f-16	CM002986.2	-	95718681	95718758	uuuagguuggugcaaaaguaauugugguuuuugccauugaaaguaaugacaaaaccacaguuacuuuugcaccaaucu	78	mml-mir-548f-16-5p	95718696	95718716	aaguaauugugguuuuugcca	mml-mir-548f-16-3p	95718730	95718750	caaaaccacaguuacuuuugc
yes				mml-miR-548f-2	CM002983.2	+	3240506	3240584	caguucuauagauuggugcaaaagucauggcgguuuuugccauuauuuuuaaugguaaaaacuguaauuacuuuugcac	79	mml-miR-548f-2-5p	3240525	3240545	aaaagucauggcgguuuuugc	mml-miR-548f-2-3p	3240562	3240582	aaaaacuguaauuacuuuugc
yes				mml-miR-548f-4	NC_007861.1	-	59137532	59137630	aaaagggcaguaucuauuagguuggugcaaaaauaauugugguuuaugccuuuacggguaauggcaaaaacuguaauuacuuuugcaccaaccuaauac	99	mml-miR-548f-4-5p	59137562	59137583	aaauaauugugguuuaugccuu	mml-miR-548f-4-3p	59137595	59137616	gcaaaaacuguaauuacuuuug
yes				mml-miR-548f-6	CM002982.3	-	82314069	82314265	auuacauauacauauuauauauuauauagaauuacauuuauauauauucauauauauauauaagguuggugcaaaaguaauugugguuuuugucauuauucaaaggcaaaaacuguaauuacuuuuucaccaaucuuaauuauauauuauguauauauuauaauauuaauuuauauauaaauauauaaacuuauaua	197	mml-miR-548f-6-5p	82314141	82314160	aaaaguaauugugguuuuug	mml-miR-548f-6-3p	82314175	82314194	caaaaacuguaauuacuuuu
yes				mml-miR-548f-8	CM002979.2	+	59948633	59948731	ucuuaaaauucacaauagguuggugcaaaaguaauugcgauuuuugucauuaaaaguaauaacaaaaacuguaauuacuuuugcgccacaauuaccuaa	99	mml-miR-548f-8-5p	59948659	59948678	aaaaguaauugcgauuuuug	mml-miR-548f-8-3p	59948695	59948714	caaaaacuguaauuacuuuu
yes	yes			mml-mir-548g	CM002978.2	-	18977407	18977461	agaguaauugugguuucugucaugaaaaguauggcaaaaaccauaauuacuuuug	55	mml-mir-548g-5p	18977407	18977428	agaguaauugugguuucuguca	mml-mir-548g-3p	18977440	18977461	gcaaaaaccauaauuacuuuug
		yes	ENSMMUT00000062575	mml-miR-548g-1	CM002989.3	-	92439160	92439251	uucuauuagguuggugcaaauguaauuguaguuuuugccacaauuaaaaguaauggcaaaacccauaauuacuuuugcgcccaacuaauaga	92	mml-miR-548g-1-5p	NA	NA	NA	mml-miR-548g-1-3p	92439215	92439236	gcaaaacccauaauuacuuuug
		yes	ENSMMUT00000076283	mml-miR-548g-2	CM002995.2	-	29226028	29226116	uauuagguuggugcaaauggaacugugguuuuugcaauuacuuuuaauagcaaaaaccacaauuacauuugcaccaaccugauauuacc	89	mml-miR-548g-2-5p	29226044	29226065	auggaacugugguuuuugcaau	mml-miR-548g-2-3p	29226077	29226098	gcaaaaaccacaauuacauuug
yes				mml-miR-548g-5	CM002982.3	-	35356345	35356493	augugcuaagcaacagguguuauucuggaaacugaaacuauuagguugguguaaaaguaauugcaguuuuugugauuuuuuuuuaauugcaaaaacuguaauuacuuuugcgccaaccuaauauggugauaaauaagaucugguccuuc	149	mml-miR-548g-5-5p	35356397	35356416	aaaaguaauugcaguuuuug	mml-miR-548g-5-3p	35356435	35356455	aaaaacuguaauuacuuuugc
		yes	ENSMMUT00000049765	mml-mir-548g-6	CM002986.2	+	97065207	97065294	uauuaggcgggugcaaaaguaauugugguuuuugucauuacuuucaauggcaaaaaacacaauuacuuuugcaccaacauaauacuaa	88	mml-mir-548g-6-5p	97065222	97065243	aaaguaauugugguuuuuguca	mml-mir-548g-6-3p	97065256	97065277	gcaaaaaacacaauuacuuuug
		yes	ENSMMUT00000065390	mml-mir-548g-7	CM002977.3	+	155314874	155314967	uauuagguuggugcaaaaguaauugugguuuuugucauuacuuuuaaauuacuuuuaauggcaaaaaccacaguuacuuuucaccaaccuaaua	94	mml-mir-548g-7-5p	155314889	155314910	aaaguaauugugguuuuuguca	mml-mir-548g-7-3p	155314934	155314955	gcaaaaaccacaguuacuuuuc
		yes	ENSMMUT00000049441	mml-mir-548g-8	CM002981.2	-	135532942	135533024	ucagguuggugcaaaaguaauugugguuuuugucauugaaaguaauggcagaaaccagaauugcuuuugcaccaacauauaua	83	mml-mir-548g-8-5p	135532955	135532976	aaaguaauugugguuuuuguca	mml-mir-548g-8-3p	135532989	135533010	gcagaaaccagaauugcuuuug
		yes	ENSMMUT00000049653	mml-mir-548g-9	CM002990.2	-	75329358	75329446	auuagauugaugcaaaaguaauugugguuuuugucauacuuuuaaaaaauggcaaaaacugguauuauuuuuacacuaccuaauacaaa	89	mml-mir-548g-9-5p	75329372	75329393	aaaguaauugugguuuuuguca	mml-mir-548g-9-3p	75329409	75329430	gcaaaaacugguauuauuuuua
		yes	ENSMMUT00000078125	mml-mir-548g-10	CM002985.3	-	125417159	125417242	uuagguuggugcaaaaguaauugugguuuuugucguuucuuuuaauggcaaaaaccacaauuacuuuugcacuaaccuaauaua	84	mml-mir-548g-10-5p	125417171	125417192	aaaaguaauugugguuuuuguc	mml-mir-548g-10-3p	125417206	125417227	gcaaaaaccacaauuacuuuug
		yes	ENSMMUT00000055812	mml-mir-548g-11	CM002978.2	-	4089327	4089416	aacuauuagguuggugcaaaaguaauuugauuuuugccacugaaaguaauggcaaaaaccauaauuacuuuugcaccaacauaauacaug	90	mml-mir-548g-11-5p	4089346	4089367	aaguaauuugauuuuugccacu	mml-mir-548g-11-3p	4089378	4089399	gcaaaaaccauaauuacuuuug
		yes	ENSMMUT00000048449	mml-mir-548g-12	CM002982.3	-	57680011	57680094	caaauauuagguuggugcaaaaguaauugugguuuuuacuguuacguuuauggcaaaaaucacaauuacuuuugcaccaacuua	84	mml-mir-548g-12-5p	57680031	57680051	aaguaauugugguuuuuacug	mml-mir-548g-12-3p	57680063	57680083	gcaaaaaucacaauuacuuuu
		yes	ENSMMUT00000048516	mml-mir-548g-13	CM002980.3	-	153604614	153604703	aucuauuagauugcugcaaaaguaguugcacuuuuugccauuacuuuuaauugcaaaaaucacaauuacuuuugcaccaaccuaauaguu	90	mml-mir-548g-13-5p	153604633	153604654	aaguaguugcacuuuuugccau	mml-mir-548g-13-3p	153604666	153604687	gcaaaaaucacaauuacuuuug
		yes	ENSMMUT00000049140	mml-mir-548g-14	CM002986.2	-	61398866	61398958	uuguacuagguuggugcaaaaguaaucgugguuuuugccguuacuuucaaugacaaaaaacacaauuacuuuugcaucaaccuaauaucuuuc	93	mml-mir-548g-14-5p	61398884	61398905	aaaguaaucgugguuuuugccg	mml-mir-548g-14-3p	61398918	61398939	acaaaaaacacaauuacuuuug
		yes	ENSMMUT00000049184	mml-mir-548g-15	CM002980.3	-	23100678	23100770	uauuggguuggugcaaacauaauugugaauguuuuccauuacuuucaauggcaaaaaucacaauuacuuuugcaccaaccuaauaucuucccu	93	mml-mir-548g-15-5p	23100694	23100715	acauaauugugaauguuuucca	mml-mir-548g-15-3p	23100728	23100749	gcaaaaaucacaauuacuuuug
		yes	ENSMMUT00000049243	mml-mir-548g-16	CM002982.3	-	122773630	122773715	uguauuggguuggugcaaaaguaauuguauuuuuugccauuacuuuuaauggcaaagaccacaauuacuuuuguaccaaccuaaau	86	mml-mir-548g-16-5p	122773647	122773668	aaaguaauuguauuuuuugcca	mml-mir-548g-16-3p	122773681	122773702	gcaaagaccacaauuacuuuug
		yes	ENSMMUT00000049290	mml-mir-548g-17	CM002978.2	-	81621406	81621488	uauuagguuggugcaaaagaaauugugguuucuugacguuacuuuuaauggcaaaacccacaauuacuuuugcacuaaccuaa	83	mml-mir-548g-17-5p	81621422	81621443	aagaaauugugguuucuugacg	mml-mir-548g-17-3p	81621456	81621477	gcaaaacccacaauuacuuuug
		yes	ENSMMUT00000049440	mml-mir-548g-18	CM002988.2	-	79168633	79168719	guauuagguuggugcaaaaguaauugcaguuuuugcauuacuuuuaauggcaaaacccacaauuacuuuugcaucaaccuaauaucu	87	mml-mir-548g-18-5p	79168649	79168670	aaaguaauugcaguuuuugcau	mml-mir-548g-18-3p	79168682	79168703	gcaaaacccacaauuacuuuug
		yes	ENSMMUT00000049481	mml-mir-548g-19	CM002977.3	+	56639401	56639480	agauuggugcaaaaguaauugcgguuuuugucauugcuuuaaauggcaaaagccacaauuacuuuugcaccaaccuaaua	80	mml-mir-548g-19-5p	56639413	56639433	aaguaauugcgguuuuuguca	mml-mir-548g-19-3p	56639446	56639467	gcaaaagccacaauuacuuuug
		yes	ENSMMUT00000049764	mml-mir-548g-20	CM002980.3	+	199915286	199915378	aacaaauauuaaguugguguaaaaguaauugugaguuuuuucauuacuuuuaauagcaaaaacuauaauuacuuuugcaccaaccuaauaauu	93	mml-mir-548g-20-5p	199915308	199915329	aaguaauugugaguuuuuucau	mml-mir-548g-20-3p	199915341	199915362	gcaaaaacuauaauuacuuuug
		yes	ENSMMUT00000049775	mml-mir-548g-21	CM002986.2	+	37265009	37265105	ugagaauuacuggauuggugcaaaaguaauugcaguuuguaucauuacguuuaauggcaaaaacuguaauuacuuuugcaccaaacuaauuguuuua	97	mml-mir-548g-21-5p	37265031	37265052	aaaguaauugcaguuuguauca	mml-mir-548g-21-3p	37265065	37265086	gcaaaaacuguaauuacuuuug
		yes	ENSMMUT00000050985	mml-mir-548g-22	CM002982.3	-	47543800	47543907	uacuauauugcugcaaaaguaauugugauuuuugccauuacuuuuacuagcauuuugccauuacuuuuaauggcaaaaaucacaauuacuuuugcaccaaccuaauac	108	mml-mir-548g-22-5p	47543813	47543834	caaaaguaauugugauuuuugc	mml-mir-548g-22-3p	47543872	47543893	gcaaaaaucacaauuacuuuug
		yes	ENSMMUT00000058873	mml-mir-548g-23	CM002991.3	-	61990742	61990831	cuauuaggguuggugcaaaagcaaucacaguuuuugccauuacuuuccauggcaaaacccguaauuacuuuugcaccgaccugauaucac	90	mml-mir-548g-23-5p	61990759	61990780	aaagcaaucacaguuuuugcca	mml-mir-548g-23-3p	61990793	61990814	gcaaaacccguaauuacuuuug
		yes	ENSMMUT00000060016	mml-mir-548g-24	CM002989.3	+	34130763	34130850	aauuuauuaggguggugcaaaaguaauugcgguuuuugcuauuacuuuucauggcaaaaacuguaauuacuuuugccccaaccuaaua	88	mml-mir-548g-24-5p	34130782	34130803	aaaguaauugcgguuuuugcua	mml-mir-548g-24-3p	34130816	34130837	gcaaaaacuguaauuacuuuug
		yes	ENSMMUT00000062346	mml-mir-548g-25	CM002993.2	-	8218764	8218864	uauuagguugacccaaaaguaauggcauuuuuugccauuauuuuuaaaugcuguuaguuugaaauggcaaaaaccguaauuacuuuugcaccaaccuaaua	101	mml-mir-548g-25-5p	8218779	8218800	aaaguaauggcauuuuuugcca	mml-mir-548g-25-3p	8218830	8218851	gcaaaaaccguaauuacuuuug
		yes	ENSMMUT00000069188	mml-mir-548g-26	CM002979.2	-	106503630	106503724	aauuauuagguuggugcaaaaguaauugagguuuuugccauugaaaguaauggcaagaaccacaauuacuuuugcaccaaccuaauauuccaaag	95	mml-mir-548g-26-5p	106503648	106503669	aaaguaauugagguuuuugcca	mml-mir-548g-26-3p	106503682	106503703	gcaagaaccacaauuacuuuug
		yes	ENSMMUT00000072496	mml-mir-548g-27	CM002997.3	-	9287488	9287593	uauuagguuggugcaaaaguaauugcgguuuuugccauugaaaguaauggcaaaaaccgcaauuacuuuuguaccagccuaauaaaucauucacccgaccacaaaa	106	mml-mir-548g-27-5p	9287503	9287524	aaaguaauugcgguuuuugcca	mml-mir-548g-27-3p	9287537	9287558	gcaaaaaccgcaauuacuuuug
		yes	ENSMMUT00000077086	mml-mir-548g-28	CM002978.2	-	99968910	99969043	ugaaauuaugccacacuaugaggugggugcaaaaguaauugcgguuuuugcaaucaaaaguaauggcaaaagccacaauuacuuuugcaccaaccugauagaugggcucaauuucaugguuagcccacauccau	134	mml-mir-548g-28-5p	99968942	99968963	aaguaauugcgguuuuugcaau	mml-mir-548g-28-3p	99968975	99968996	gcaaaagccacaauuacuuuug
		yes	ENSMMUT00000077711	mml-mir-548g-29	CM002980.3	-	179740903	179740995	gcuucuaugagguuguugcaaaaguaauugcgguuuuugcuauuauuuucaguggcaagaaccacaauuacuuuugcaucaacacaaauacuu	93	mml-mir-548g-29-5p	179740923	179740944	aaaguaauugcgguuuuugcua	mml-mir-548g-29-3p	179740957	179740978	gcaagaaccacaauuacuuuug
		yes	ENSMMUT00000076983	mml-miR-548g-3	CM002977.3	-	61337011	61337094	guauuagcuuggugcaaaaguaaucacgguuuuugccauuaauuucaauggcaaaacugcgauuacuuuugcaccaaccuaaua	84	mml-miR-548g-3-5p	61337025	61337046	caaaaguaaucacgguuuuugc	mml-miR-548g-3-3p	61337063	61337084	aaaacugcgauuacuuuugcac
		yes	ENSMMUT00000078487	mml-mir-548g-30	CM002985.3	-	101449839	101449923	uuuuauuagguuggugcaaaaguaauuguggguguugccauuauuuucaacagcaaauaccacaauuacuuuugcaccaaccuaa	85	mml-mir-548g-30-5p	101449857	101449878	aaaguaauuguggguguugcca	mml-mir-548g-30-3p	101449891	101449912	gcaaauaccacaauuacuuuug
		yes	ENSMMUT00000077289	mml-miR-548g-31	CM002987.3	+	78184672	78184755	auuagguuggugcaaaaguaaucgcaguuuuuuacauuacuuucaaaggcaaaaaccgugauuacuuuuggaucaaccuaauag	84	mml-miR-548g-31-5p	78184686	78184707	aaaguaaucgcaguuuuuuaca	mml-miR-548g-31-3p	78184720	78184741	gcaaaaaccgugauuacuuuug
yes	yes			mml-mir-548h	CM002978.2	+	27117405	27117462	agaaguaauugcuguuuuugccauuacuuuuaaagacaaaaacugcagugacuucugu	58	mml-mir-548h-5p	27117405	27117426	agaaguaauugcuguuuuugcc	mml-mir-548h-3p	27117441	27117462	caaaaacugcagugacuucugu
yes				mml-miR-548h-1	CM002977.3	-	148031067	148031216	cacauguauggguacuggagaaauucuuuuauuagguuggugcaaaaguaaucgcgguuuuugccauugaaaguaauggcaaaauggcaaaaaccgcaauuacuuucgcacuccccuaauagauuacuuucgcacuccccuaauagauga	150	mml-miR-548h-1-5p	148031110	148031130	aaaaguaaucgcgguuuuugc	mml-miR-548h-1-3p	148031156	148031175	aaaaccgcaauuacuuucgc
		yes	ENSMMUT00000049657	mml-miR-548h-2	CM002987.3	-	74287497	74287610	uuugguuuugcaaucuauuagguugguacaaaaguaauugcuguuuuugucauuaaaaguaaaugucaaaaacugcaauuauuuuugcaucaaccuaauaaucaucuuuauuuu	114	mml-miR-548h-2-5p	74287526	74287547	aaaaguaauugcuguuuuuguc	mml-miR-548h-2-3p	74287564	74287585	aaaaacugcaauuauuuuugca
yes				mml-miR-548h-3	JSUE03128454.1	-	197	346	guaggaggcaguguagcauaguccaagaggcuauuagguuggugcaaaaguaaucgcgguuuuugccauuacuuuuaauuguuuugcuuuugcacgaaccgcaguuacuuuugaaccagccuaauacuacuugcucuuccaccugucuca	150	mml-miR-548h-3-5p	242	262	aaaaguaaucgcgguuuuugc	mml-miR-548h-3-3p	290	311	acgaaccgcaguuacuuuugaa
yes				mml-miR-548h-4	CM002977.3	-	215108311	215108459	aguauuucaucccuuuuuuacaacugaauaguauuuuuuagggugguacaaaaguaaucgcgguuuuuaccauuaauuucaaugacaaaaacugcaauuacuugugcaucaaccuaaucucaugcauauauaauaauuucuuuguucau	149	mml-miR-548h-4-5p	215108360	215108380	aaaaguaaucgcgguuuuuac	mml-miR-548h-4-3p	215108399	215108418	aaacugcaauuacuugugca
yes				mml-miR-548h-5	CM002984.2	-	9268083	9268282	aguauuauuucagcauuugugaauuaaauaggaauuaaauagaaguaggacagcguagguguuagguuggcacaaaaguaauugcgguuuuugccauugcaguugccauuuuugcaauggaaaaaucacaauuucuuuugcgccaaccuaauauucgaaauguuacuaagguguauaccauuuagaggcaauuacuggau	200	mml-miR-548h-5-5p	9268156	9268175	aaaaguaauugcgguuuuug	mml-miR-548h-5-3p	9268205	9268224	aaaucacaauuucuuuugcg
yes				mml-miR-548h-6	CM002984.2	+	17067672	17067770	cgccauuuauuaaguuggugcaaaaguaaucgcgguuuuuaccacuacuuuuaauggcaaaaccugcaauugcuuuugcacccaccuaauagaagagua	99	mml-miR-548h-6-5p	17067693	17067713	aaaaguaaucgcgguuuuuac	mml-miR-548h-6-3p	17067731	17067750	aaaccugcaauugcuuuugc
yes		yes	ENSMMUT00000055561	mml-miR-548h-7	CM002984.2	+	67271082	67271281	aaauuacacuggucagucuuaaaaauacaagugaauaguaauuuuaugcuuaguaucagguugaugcaaaaguaauugcgguuuuugcuauuacuuuuauaugucaaaaaacugcaauugcuuuugcaccaaccuaauauauaucaggaccuaagcuaaauguuuucuauauaccauauuauguuauuuaauuuccguga	200	mml-miR-548h-7-5p	67271149	67271168	aaaaguaauugcgguuuuug	mml-miR-548h-7-3p	67271189	67271208	aaaacugcaauugcuuuugc
yes		yes	ENSMMUT00000049602	mml-miR-548h-8	CM002984.2	+	160525125	160525274	ucuugagauggaaucuacuccuggugaaguauuauguugguccaaaaguaauugcgguuuuugccgcaauuacuuuuuugccgcaauuacuuuuauggcaaaaaccgcaauuacuuuugcaccaaccuaauggagccauuaugagcacug	150	mml-miR-548h-8-5p	160525168	160525187	aaaaguaauugcgguuuuug	mml-miR-548h-8-3p	160525225	160525245	aaaaccgcaauuacuuuugca
yes				mml-miR-548h-9	CM002984.2	+	165571837	165571936	guacauugauacuagcucggugcaaaaguaauugcgguuuuugccauuacuuucacugacaaaaaaugcaaugacuuuugcaccaacuuaauacauuuaa	100	mml-miR-548h-9-5p	165571860	165571879	aaaaguaauugcgguuuuug	mml-miR-548h-9-3p	165571898	165571917	aaaaaugcaaugacuuuugc
yes				mml-miR-548h-10	CM002983.2	-	45928638	45928736	uuaggucaaguugguugauagguuggugcaaaaguaaucgcgguuuuuaccuuugaaauaguaauggcaaaaaccaugauuacuuuggcaucaaccuaa	99	mml-miR-548h-10-5p	45928667	45928687	aaaaguaaucgcgguuuuuac	mml-miR-548h-10-3p	45928707	45928726	aaaaccaugauuacuuuggc
yes				mml-miR-548h-11	CM002983.2	-	137748699	137748797	uaugaagcuauuauguuggugcaaaaguaaucgcgguuuuucucauuacauuugauggcaaaaaccgcaauuacuuuuguaccaaucuaauauuuggca	99	mml-miR-548h-11-5p	137748722	137748742	aaaguaaucgcgguuuuucuc	mml-miR-548h-11-3p	137748757	137748777	caaaaaccgcaauuacuuuug
yes		yes	ENSMMUT00000056575	mml-miR-548h-12	CM002981.2	-	157362440	157362541	aguuauuuuucauuggguugcugcagaaguaauugcuguuuuugccacuacuuucaacggcaaaacuacaaguacuuuugcgccaacauaauagguuaaugu	102	mml-miR-548h-12-5p	157362464	157362485	agaaguaauugcuguuuuugcc	mml-miR-548h-12-3p	157362500	157362520	caaaacuacaaguacuuuugc
yes		yes	ENSMMUT00000049530	mml-miR-548h-13	CM002981.2	-	187395516	187395607	uaauauauauguacaagguuggugcaaaaguaaucgcgguuuuugccauuacuuuuaauggcaagaauagcgauuacuugugcgccgaccua	92	mml-miR-548h-13-5p	187395541	187395561	aaaaguaaucgcgguuuuugc	mml-miR-548h-13-3p	187395578	187395598	aagaauagcgauuacuugugc
yes				mml-miR-548h-14	CM002982.3	-	90160263	90160362	ucuuaaaaaaugguuuccauuagguuggugcaaaaguaauugcgguuuuugccauuuacuuucaauguaaaaaccacaauuacuuuugcaucaaccuaaa	100	mml-miR-548h-14-5p	90160294	90160313	aaaaguaauugcgguuuuug	mml-miR-548h-14-3p	90160332	90160351	aaaaccacaauuacuuuugc
		yes	ENSMMUT00000050738	mml-miR-548h-15	CM002993.2	+	9940103	9940190	guauuagguuggugcaaaaguaauugcuguuacugccaccacuuuuaauggcaaaaacagcaauuacuuuuacaacaaccuaauauuu	88	mml-miR-548h-15-5p	9940119	9940140	aaaguaauugcuguuacugcca	mml-miR-548h-15-3p	9940152	9940173	ggcaaaaacagcaauuacuuuu
yes				mml-miR-548h-16	CM002991.3	+	116902873	116902972	cacacagauuauaaccuuaagcauuaggcuggcacaaaaguaaucgcgguuuuugccacugaaauggcaaaacugcauuuacuuuuguaccaaccuggua	100	mml-miR-548h-16-5p	116902908	116902928	aaaaguaaucgcgguuuuugc	mml-miR-548h-16-3p	116902941	116902960	aaaacugcauuuacuuuugu
yes				mml-miR-548h-17	CM002985.3	-	31672577	31672676	ggcaaugauauuugguuggugcaaaaguaauugcgguuuuugcaauuaaaaguaacagcaaaaaccacaauuacuuuugaacaaaccuauuaguaugccu	100	mml-miR-548h-17-5p	31672600	31672622	aaaguaauugcgguuuuugcaau	mml-miR-548h-17-3p	31672635	31672655	caaaaaccacaauuacuuuug
yes				mml-miR-548h-18	CM002987.3	-	10892888	10892973	uauuagguuggugcaaaaguaauugcgguuuuugccauuaaaaguaacagcaaaaaacugcaauuacuuuugcaucaaccuaauac	86	mml-miR-548h-18-5p	10892902	10892921	aaaaguaauugcgguuuuug	mml-miR-548h-18-3p	10892940	10892959	aaaaacugcaauuacuuuug
yes				mml-miR-548h-19	CM002987.3	-	70395085	70395233	guuuaacacgcugcuauagcuaucuugaaauucauugugucagguuagagcaaaaguaauugcgguuuuugccuuuuuuuuuaacgugauggcaaaaaucgcaauuacuuuugcacuaaccuaauaauguuugaagaaggagggucaca	149	mml-miR-548h-19-5p	70395136	70395155	aaaaguaauugcgguuuuug	mml-miR-548h-19-3p	70395179	70395198	aaaaucgcaauuacuuuugc
yes				mml-miR-548h-21	CM002992.3	+	67338056	67338155	cucaaugagaauaauagauuggugcaaaaguaaucgcgguuuuugccaucaaaaguaaugccaaaaacccgcgauuacuucugcaccaaccuaauacaug	100	mml-miR-548h-21-5p	67338081	67338101	aaaaguaaucgcgguuuuugc	mml-miR-548h-21-3p	67338119	67338139	aaaacccgcgauuacuucugc
yes		yes	ENSMMUT00000049457	mml-miR-548h-22	CM002992.3	+	71255657	71255756	caucugaaaaagcugcauaauacuggguuggugcaaaaguaauugcgguuuuuggcauuaaaagaaugggaaaaccgcaauuacuuuugugccaaccuaa	100	mml-miR-548h-22-5p	71255691	71255710	aaaaguaauugcgguuuuug	mml-miR-548h-22-3p	71255728	71255748	aaaccgcaauuacuuuugugc
yes				mml-miR-548h-23	JSUE03298744.1	-	180	329	ucauagaaaggcuccucauucccccagggcuauuaaguugcugcaaaaguaaucgcgguuuuugccauuaaaaguaauggcaaagacugugaugacuuuugcaccagccuaauaacacugagacucugugguaguguacaaugcccuuca	150	mml-miR-548h-23-5p	224	244	aaaaguaaucgcgguuuuugc	mml-miR-548h-23-3p	261	284	aaagacugugaugacuuuugcacc
yes		yes	ENSMMUT00000048498	mml-miR-548h-24	CM002989.3	+	17151568	17151664	uauagacauauuaaguuggugcgaaaguaauugcgguuuuugccauaaaagugaugacaaaaaucgcaauuacuuuugcaccaaccauguuacuaca	97	mml-miR-548h-24-5p	17151591	17151612	aaaguaauugcgguuuuugcca	mml-miR-548h-24-3p	17151625	17151645	caaaaaucgcaauuacuuuug
yes				mml-miR-548h-25	CM002989.3	-	35549815	35549964	uuacauauauaaagauauaguaaucauuuuuauuaaggguggugcaaaaguaauugcgguuuuugccauugcaaaaccgcacuuuacugcaaaaaccacaauuacuuuuugcuccaaccuaauauguguuguuagaaugaugauauuuca	150	mml-miR-548h-25-5p	35549860	35549879	aaaaguaauugcgguuuuug	mml-miR-548h-25-3p	35549906	35549926	aaaaccacaauuacuuuuugc
yes				mml-miR-548h-26	CM002989.3	-	65036796	65036995	ugaguucaucaagggaggccgugaagaugagaagaggagggagcggagcuauucgguugguguaaaaguaauugcgguuuuuguuauuaccuuaucuuuuagguaaugugguaaaacccauuaccuuaacggcaaaaaaucacgauuacuucugcaccaaccuaauagaagcccagagaacggcagccucugacaaaaca	200	mml-miR-548h-26-5p	65036859	65036878	aaaaguaauugcgguuuuug	mml-miR-548h-26-3p	65036918	65036939	accuuaacggcaaaaaaucacg
yes		yes	ENSMMUT00000049946	mml-miR-548h-27	CM002989.3	-	108644156	108644255	caguagcagcaacagggacugucgaggguuuauuacaagccaggaacccuucuaagccuauuacuauuauccugguguaaaaguaaucgcgguuuuugcc	100	mml-miR-548h-27-5p	108644170	108644191	gggacugucgaggguuuauuac	mml-miR-548h-27-3p	108644234	108644254	aaaaguaaucgcgguuuuugc
yes				mml-miR-548h-29	CM002978.2	+	60214403	60214552	cucaagcuccacuucccacuacagaaaguucaacuauuaggucaaugcaaaaguaauugcgguuuuugccacugaaacuaaugacaaaaccgcaauuacuuuugcaccaaccuaauagcaacucuucucaagauaggacaucuuuuugaa	150	mml-miR-548h-29-5p	60214451	60214470	aaaaguaauugcgguuuuug	mml-miR-548h-29-3p	60214489	60214507	aaaccgcaauuacuuuugc
yes				mml-miR-548h-30	CM002988.2	+	35654212	35654411	cauuuagguauacuuugaaugugauuagugacagccuucucaagucaaaucuacuguaagagguuuagauuauguuggugcaaaaguaauugcgguuuuugccauuacuuuuaaugcagaacugcaauuacuuuugcaccuaccuaauauuaggaaagguaaggacuagaaucugcacuacgguaaauuacucaaaguaa	200	mml-miR-548h-30-5p	35654293	35654312	aaaaguaauugcgguuuuug	mml-miR-548h-30-3p	35654330	35654348	gaacugcaauuacuuuugc
yes		yes	ENSMMUT00000050903	mml-miR-548h-31	CM002988.2	+	86720918	86721017	ugcaggcacagaaauauuaggauaguacaaaaguaauugcgguuuuugcaauuacuuucaauggcaaaaacugcaaucacuuuugcacuaaccuaauaaa	100	mml-miR-548h-31-5p	86720946	86720965	aaaaguaauugcgguuuuug	mml-miR-548h-31-3p	86720984	86721004	aaaacugcaaucacuuuugca
yes				mml-miR-548h-32	CM002993.2	+	22721507	22721656	aguacugaauugaagaaaagcaucaaguaaauauuguguuggugcaaaaguaauugcgguuuuugccauucauuucaauggugaaaaccacaaugacuuuugcaccuaccuaauaauauuauagguugaaugcaggcaugcaaaguuaug	150	mml-miR-548h-32-5p	22721552	22721571	aaaaguaauugcgguuuuug	mml-miR-548h-32-3p	22721592	22721609	aaccacaaugacuuuugc
yes		yes	ENSMMUT00000055371	mml-miR-548h-33	CM002997.3	-	144132261	144132410	ugcccuagugaacaaccucagagagugcuguuguguaauauuaggcuggugcaaaaguaauugcgguuuuugccauuacuuuuaaugguaaaaacugcaauuacuuucgcaccuaccuaguauuuguguucccccaaauucauauguuga	150	mml-miR-548h-33-5p	144132313	144132332	aaaaguaauugcgguuuuug	mml-miR-548h-33-3p	144132351	144132369	aaaacugcaauuacuuucg
		yes	ENSMMUT00000071483	mml-mir-548h-34	CM002993.2	+	46980402	46980503	aacucuuagguugguguaaaaguaauugcuguuuuugccauuacuuucaauuggcaagaaccgcaauuacuuuugcaccaaccuaauaaaaacuuuauuggg	102	mml-mir-548h-34-5p	46980419	46980440	aaaaguaauugcuguuuuugcc	mml-mir-548h-34-3p	46980456	46980477	caagaaccgcaauuacuuuugc
		yes	ENSMMUT00000051105	mml-mir-548h-35	CM002981.2	+	154114040	154114129	uauuagguuggugcagaaguaaucgcuguuuuugccauaacuuucaauggcaaaaacugugauuacuuuugcaccaaccuaauaaaucuu	90	mml-mir-548h-35-5p	154114054	154114075	agaaguaaucgcuguuuuugcc	mml-mir-548h-35-3p	154114090	154114111	caaaaacugugauuacuuuugc
		yes	ENSMMUT00000070541	mml-mir-548h-36	CM002987.3	-	12798282	12798380	auauuaggcuggugcagaaguaauugcgguuuuugccauuacuuuuaauuuuugccauuaaaaguaauggcaaaaccacgauuacuuuugcaccagccu	99	mml-mir-548h-36-5p	12798297	12798318	agaaguaauugcgguuuuugcc	mml-mir-548h-36-3p	12798350	12798371	ggcaaaaccacgauuacuuuug
		yes	ENSMMUT00000049816	mml-mir-548h-37	CM002988.2	-	87066553	87066638	uauuagguuggugcaaaaguauuugcggguuuugucauugaaaguaauggcaaaaacugcaauuacuucugcaccaaccuaaugcu	86	mml-mir-548h-37-5p	87066568	87066588	aaaguauuugcggguuuuguc	mml-mir-548h-37-3p	87066603	87066623	caaaaacugcaauuacuucug
		yes	ENSMMUT00000055001	mml-mir-548h-38	CM002997.3	-	24655642	24655733	aauuuauuagguuggugcaaaaguaauugcaguuuuugccauuacuuucagcggcaaaaacugcaauuacuucugcaccaaccuaauaguaa	92	mml-mir-548h-38-5p	24655662	24655682	aaguaauugcaguuuuugcca	mml-mir-548h-38-3p	24655696	24655716	caaaaacugcaauuacuucug
		yes	ENSMMUT00000061790	mml-miR-548h-39	CM002989.3	-	74549489	74549578	uauuagguugguacggagguaacuguaguucuugccuuggaaaguaaugggaaaaacugcaauuacuuuacaccaaccuaauauuuuagu	90	mml-miR-548h-39-5p	74549506	74549527	gguaacuguaguucuugccuug	mml-miR-548h-39-3p	74549535	74549556	augggaaaaacugcaauuacuu
	yes			mml-mir-548i	CM002984.2	+	9687432	9687489	aaaggucauugcagauuuugccauuacuuuuaguggcaaaaucgucuaugacuuuugc	58	mml-mir-548i-5p	9687432	9687453	aaaggucauugcagauuuugcc	mml-mir-548i-3p	9687468	9687489	caaaaucgucuaugacuuuugc
		yes	ENSMMUT00000052937	mml-miR-548i-1	CM002997.3	-	74006584	74006672	auauuuauuagguucgugcuaaggucauugugguuuuugccauuaguuucaauggcaaaaacugcaaugacuuuugcaccaaccuaaua	89	mml-miR-548i-1-5p	74006605	74006626	aggucauugugguuuuugccau	mml-miR-548i-1-3p	74006637	74006658	ggcaaaaacugcaaugacuuuu
		yes	ENSMMUT00000076321	mml-miR-548i-2	CM002987.3	-	125556948	125557034	auucauauuagguuggugcaaaaguaauugagcuuuuuaccguuacuuucaauggcaaaaacugcaaugacuuuugcaccaaccuaa	87	mml-miR-548i-2-5p	125556969	125556990	aaguaauugagcuuuuuaccgu	mml-miR-548i-2-3p	125557001	125557022	ggcaaaaacugcaaugacuuuu
yes	yes			mml-mir-548j	CM002983.2	-	113296852	113296909	aaaaguaauugugggcuuugcuauagaaaguaaagguaaaaaccgcaauuacuuuugc	58	mml-mir-548j-5p	113296852	113296872	aaaaguaauugugggcuuugc	mml-mir-548j-3p	113296889	113296909	aaaaaccgcaauuacuuuugc
yes				mml-miR-548j-1	CM002977.3	+	153804714	153804826	gcaauaaauuugaauaauuauuagguugguacaaaguaauguggcuuuugccauuacuuucauggcaaaaaccgcaauuacuuuugcauuaaccucguaucauugguaaagua	113	mml-miR-548j-1-5p	153804747	153804765	aaguaauguggcuuuugcc	mml-miR-548j-1-3p	153804779	153804799	caaaaaccgcaauuacuuuug
yes				mml-miR-548j-4	JSUE03182537.1	+	3868	4018	gaguggaaaauggccugaaagggguccaaaguauuuguguugaugcaaaaguaauugugguucuugccacugaaaauaauagcaaaaaccgcaauuacuuuugcaacaaccucauagaagcaggauacaaaugaaguggccacugccugcg	151	mml-miR-548j-4-5p	3914	3935	aaaaguaauugugguucuugcc	mml-miR-548j-4-3p	3950	3971	caaaaaccgcaauuacuuuugc
yes				mml-miR-548j-5	JSUE03182537.1	+	3868	4018	gaguggaaaauggccugaaagggguccaaaguauuuguguugaugcaaaaguaauugugguucuugccacugaaaauaauagcaaaaaccgcaauuacuuuugcaacaaccucauagaagcaggauacaaaugaaguggccacugccugcg	151	mml-miR-548j-5-5p	3914	3935	aaaaguaauugugguucuugcc	mml-miR-548j-5-3p	3950	3971	caaaaaccgcaauuacuuuugc
yes				mml-miR-548j-7	CM002984.2	+	22115735	22115883	guauguggaacaguggagacauuuauauacuauuaggugaugcaaaaguaacugcgguuuuugacauuaaaaguaauggcaaaacugcauuacuuuugcaccaaacuaauacuauaaguaguacugaaaauuguacaucaauuuuagag	149	mml-miR-548j-7-5p	22115775	22115797	ugcaaaaguaacugcgguuuuug	mml-miR-548j-7-3p	22115817	22115837	aacugcauuacuuuugcacca
yes				mml-miR-548j-8	CM002984.2	-	67271110	67271260	auaugguauauagaaaacauuuagcuuagguccugauauauauuagguuggugcaaaagcaauugcaguuuuuugacauauaaaaguaauagcaaaaaccgcaauuacuuuugcaucaaccugauacuaagcauaaaauuacuauucacuu	151	mml-miR-548j-8-5p	67271165	67271189	aaagcaauugcaguuuuuugacaua	mml-miR-548j-8-3p	67271202	67271222	caaaaaccgcaauuacuuuug
yes				mml-miR-548j-9	CM002984.2	-	82633649	82633798	ccuuucaggaagaagcacugauguauggcuuccauuagguuaaugcaaaaguaaucgcgauuuuggccauugcuuuccauggcaaaaaccgcaauuacuuuuguaccaacguaauaggauuuuuauuugcaaauacguuauuuuuuacca	150	mml-miR-548j-9-5p	82633696	82633716	aaaguaaucgcgauuuuggcc	mml-miR-548j-9-3p	82633731	82633751	caaaaaccgcaauuacuuuug
yes				mml-miR-548j-10	JSUE03212648.1	+	4100	4191	cacuuguaaugcuauauauugaguugaugcaaaaguaauugcggcuuuugcuauuacucuuaaaaaaaauggcaaaaaccgcaauuacuuuu	92	mml-miR-548j-10-5p	4131	4151	aaaguaauugcggcuuuugcu	mml-miR-548j-10-3p	491	510	caaaacugcaauuguuuuug
yes				mml-miR-548j-13	CM002981.2	-	147697093	147697192	gccccccaaaaaaaaaaaaaaaaaaaagggaauugugguuuugaccauuuuuuuaaaaauggcaaaaaccgcaauuacuuuuguaccaacccaauuaaug	100	mml-miR-548j-13-5p	147697118	147697138	aagggaauugugguuuugacc	mml-miR-548j-13-3p	147697155	147697175	caaaaaccgcaauuacuuuug
yes		yes	ENSMMUT00000049701	mml-miR-548j-15	CM002981.2	-	176624453	176624601	gccagacucaacuuacuuuccuuuauccucauccuuuuauuagguuggugaaaaaguaacugcgauuuuugccauuaaaagcaauugcaaaaaccgcaauuacuuuuacaccaaccuaauaguucuuaaucauuggacccugccuugaa	149	mml-miR-548j-15-5p	176624505	176624526	aaaguaacugcgauuuuugcca	mml-miR-548j-15-3p	176624540	176624561	caaaaaccgcaauuacuuuuac
yes		yes	ENSMMUT00000049450	mml-miR-548j-16	CM002982.3	-	70915960	70916109	agguccugcuggcuggauauacacauagcaauaauauuagguuggugcaaaaguaauugcggucuuugccauuaaaaguaauggcaaacugcaauuacuauugcaccagcuuaauauguaccaguuugggucugcagucccuuuucuauu	150	mml-miR-548j-16-5p	70915997	70916017	uagguuggugcaaaaguaauu	mml-miR-548j-16-3p	70916054	70916074	uuacuauugcaccagcuuaau
yes				mml-miR-548j-17	CM002982.3	+	95887259	95887358	aaguuuauuauuaguuuggugcaaaaguaauugcgauuuuugccauuaaaaguaaugacaaaaaccgcaauuacuuuuggauaaacguaauaccuggcuc	100	mml-miR-548j-17-5p	95887281	95887300	aaaaguaauugcgauuuuug	mml-miR-548j-17-3p	95887319	95887339	aaaaccgcaauuacuuuugga
yes				mml-miR-548j-19	CM002985.3	-	129804041	129804140	ggauuaccugcuuuaguaccucauggugauauuauuauuagguuggugcaaaaguaauugugauuuuugccauugaaaguaauggcaaaaccgcaauuac	100	mml-miR-548j-19-5p	129804091	129804112	aaaguaauugugauuuuugcca	mml-miR-548j-19-3p	129804125	129804145	gcaaaaccgcaauuacuuuug
yes				mml-miR-548j-20	CM002987.3	+	70395074	70395223	caaaauaaaagugugacccuccuucuucaaacauuauuagguuagugcaaaaguaauugcgauuuuugccaucacguuaaaaaaaaaggcaaaaaccgcaauuacuuuugcucuaaccugacacaaugaauuucaagauagcuauagcag	150	mml-miR-548j-20-5p	70395122	70395141	aaaaguaauugcgauuuuug	mml-miR-548j-20-3p	70395165	70395184	aaaaccgcaauuacuuuugc
yes				mml-miR-548j-21	CM002987.3	+	81178985	81179083	aaucaggcaaauguuucauuagguuggugcaaaaguaguugugguuuuuacauuaaaaguaauggcaaaaaccgcaauuacuuuuacaccaaucuaaua	99	mml-miR-548j-21-5p	81179004	81179024	uagguuggugcaaaaguaguu	mml-miR-548j-21-3p	81179062	81179082	uuacuuuuacaccaaucuaau
yes				mml-miR-548j-23	NC_007869.1	-	70464728	70464827	aaucaugccaguuuauauuagguuggugcaaaaguaauuaugguuuuugccaucaaaagcaauggcaaaaaccgcaauuacuuuuguaccaaucuaauaa	100	mml-miR-548j-23-5p	70464758	70464778	aaaguaauuaugguuuuugcc	mml-miR-548j-23-3p	70464793	70464813	caaaaaccgcaauuacuuuug
yes		yes	ENSMMUT00000073580	mml-miR-548j-24	CM002978.2	-	3012885	3013035	caucuuaacacaguacuauuuaucuauuagguugaugcgaaaguaauugcaauucuugccauuuaguuuacuuuugcaauuuacuuuuaaauggcaaaaaccgcaauuacuuuugcaucaaccuaauauuuucgguuuuuguugccugugc	151	mml-miR-548j-24-5p	3012924	3012944	aaaguaauugcaauucuugcc	mml-miR-548j-24-3p	3012979	3012999	caaaaaccgcaauuacuuuug
yes				mml-miR-548j-25	CM002979.2	+	6559652	6559802	uagucugggaggaaauacacugaauuguuaucaucagguuggugcaaaagcaguugcgauuuuugccacuaaaaguaauggcaaaaaccgcaauuacuuuugcaccaaucuaauuuaauagugguucacuuuggaaagguuaugagauacu	151	mml-miR-548j-25-5p	6559698	6559718	aaagcaguugcgauuuuugcc	mml-miR-548j-25-3p	6559733	6559753	caaaaaccgcaauuacuuuug
yes				mml-miR-548j-27	NC_007872.1	+	36179908	36180007	ugguacaaaaguaauugcgauuuuugccguuuuuuuguggguuuuuuuguuuuuuguuuuuuuuuuuaaauggcaaaaaaccgcaauuacuuuugugccg	100	mml-miR-548j-27-5p	36179913	36179933	caaaaguaauugcgauuuuug	mml-miR-548j-27-3p	36179981	36180002	caaaaaaccgcaauuacuuuug
yes				mml-miR-548j-28	CM002986.2	-	59156107	59156225	guaguuggugcaagaguaauugcauuuuuugccauuaaaaguaauggcaaaaaccgcaauuacuuuugcaucaacuauauauaucucaaucucagguaauauauggacagaguugaaaa	119	mml-miR-548j-28-5p	59156119	59156139	agaguaauugcauuuuuugcc	mml-miR-548j-28-3p	59156154	59156174	caaaaaccgcaauuacuuuug
yes				mml-miR-548j-29	JSUE03246004.1	-	206	305	aauaauuuaucagauggaugcaaaaguaauugcggucuuugccauuacuuuuaauggcaacuacuuuuaauggcaaaaacugcaauuacuuuugcaccaa	100	mml-miR-548j-29-5p	228	248	aaaguaauugcggucuuugcc	mml-miR-548j-29-3p	279	299	caaaaacugcaauuacuuuug
yes				mml-miR-548j-30	CM002996.3	+	28305603	28305703	guuguuguaaaaaauaugggacuggugcaaaaguaauugagguuucuaccauugaaaguaauggcaaaaaccgcaauuacuuuugcacucacugguuugag	101	mml-miR-548j-30-5p	28305632	28305652	aaaguaauugagguuucuacc	mml-miR-548j-30-3p	28305667	28305687	caaaaaccgcaauuacuuuug
		yes	ENSMMUT00000050852	mml-mir-548j-32	CM002980.3	-	176125159	176125254	auugaaauauauaagguuggugcaaaaguaauuguggucuuugccauuacuuucaauggcaacagcugcaauuacuuuugcaugaaccuaauauuu	96	mml-mir-548j-32-5p	176125182	176125203	aaaaguaauuguggucuuugcc	mml-mir-548j-32-3p	176125218	176125239	caacagcugcaauuacuuuugc
		yes	ENSMMUT00000055707	mml-mir-548j-33	CM002980.3	-	24480592	24480676	auguucgugcaaaaguaauuguggguuuugcuauuaauugugauuacuuguaauggcaaaacccgcaauuacuuuugcaccaacc	85	mml-mir-548j-33-5p	24480602	24480623	aaaaguaauuguggguuuugcu	mml-mir-548j-33-3p	24480648	24480669	caaaacccgcaauuacuuuugc
		yes	ENSMMUT00000049728	mml-mir-548j-34	CM002980.3	-	76195	76308	uauugggcuggugcaaaaguaauuguggguuuugccacuaaaaguaauggcagaaacuacaauuacuuuugcacgaaccuuacagguuuucaccagcguguaaaaguguucccu	114	mml-mir-548j-34-5p	76209	76230	aaaaguaauuguggguuuugcc	mml-mir-548j-34-3p	76245	76266	cagaaacuacaauuacuuuugc
		yes	ENSMMUT00000049378	mml-mir-548j-35	CM002982.3	+	115842251	115842340	uauuagguuggugcaaaaguaauuguggguuuugucaucacuuuuaguggaaaaacuguaauuauuuuuguaccaaccuaauuuuuuugu	90	mml-mir-548j-35-5p	115842265	115842286	aaaaguaauuguggguuuuguc	mml-mir-548j-35-3p	115842303	115842324	aaacuguaauuauuuuuguacc
		yes	ENSMMUT00000062181	mml-mir-548j-36	CM002983.2	+	117327494	117327582	ugauaugcuacuagauugguacaaaaguaauuguggguuuugaaugaaaaguaauggcaaaacccacaacuacuuuugcacuaaccuaa	89	mml-mir-548j-36-5p	117327516	117327535	aaaaguaauuguggguuuug	mml-mir-548j-36-3p	117327553	117327572	aaacccacaacuacuuuugc
		yes	ENSMMUT00000049746	mml-mir-548j-37	CM002984.2	-	74173411	74173493	uauuagguuggugcaaaaguaauugcuguuuuugcccuuaaaaguaaugacaaaaucgcaauuacuuuugcaucagccuagua	83	mml-mir-548j-37-5p	74173422	74173443	ugcaaaaguaauugcuguuuuu	mml-mir-548j-37-3p	74173460	74173481	acaaaaucgcaauuacuuuugc
		yes	ENSMMUT00000065764	mml-mir-548j-38	CM002977.3	-	71944279	71944367	gcauaacuauagguaggugcaaaaguaauugcuguuuuugccauuacuuucaguggcaaaaccacaauuacuuuugcacugaccuagua	89	mml-mir-548j-38-5p	71944300	71944321	aaaguaauugcuguuuuugcca	mml-mir-548j-38-3p	71944334	71944355	gcaaaaccacaauuacuuuugc
		yes	ENSMMUT00000061410	mml-mir-548j-39	CM002991.3	-	81042485	81042588	cuauuagcugguacacaaguuauagcgguuuuugccagcacuuuaauuuugucauuuacuuuaauggcaaaaaccacaauuacuuuugcacgaaccugauacau	104	mml-mir-548j-39-5p	81042499	81042520	acaaguuauagcgguuuuugcc	mml-mir-548j-39-3p	81042552	81042573	caaaaaccacaauuacuuuugc
		yes	ENSMMUT00000061346	mml-mir-548j-40	CM002991.3	+	63783505	63783600	accaauucuuagguuggugcaaaaguaauugcagucuuugucauuaaaaacaauaaaaaaaccgcaauuacuuuugcaccgaccuaaauauuauuu	96	mml-mir-548j-40-5p	63783525	63783545	aaaaguaauugcagucuuugu	mml-mir-548j-40-3p	63783561	63783581	aaaaaccgcaauuacuuuugc
		yes	ENSMMUT00000077139	mml-mir-548j-41	CM002993.2	+	25490296	25490383	guauuagguuggugcaaagguaauugcaguuuuugcuguuacuuucaaugguaaaaaccgcaauuacuuuugcaccaaaccuaaaucu	88	mml-mir-548j-41-5p	25490311	25490331	aaagguaauugcaguuuuugc	mml-mir-548j-41-3p	25490348	25490368	aaaaaccgcaauuacuuuugc
		yes	ENSMMUT00000067248	mml-mir-548j-42	CM002989.3	+	30220877	30220956	uggugcaaaaguaauuguggcuuuugccauucaauguaaauuaaauguaaauggcaaaaaccgcaauuacuuuugcacca	80	mml-mir-548j-42-5p	30220883	30220903	aaaaguaauuguggcuuuugc	mml-mir-548j-42-3p	30220932	30220952	aaaaaccgcaauuacuuuugc
		yes	ENSMMUT00000056930	mml-mir-548j-43	CM002977.3	+	187708880	187708977	auuaagaugguauuacgcuggugcaaaaguaauugagguuuuugucauugaaaaauaauagcaaaaaccgcaauuacuuuugcaccaaccuaauaaua	98	mml-mir-548j-43-5p	187708905	187708925	aaaguaauugagguuuuuguc	mml-mir-548j-43-3p	187708942	187708962	aaaaaccgcaauuacuuuugc
		yes	ENSMMUT00000077899	mml-mir-548j-44	CM002997.3	-	124082789	124082878	uaaauauuagauuagugccaaaguaaucacuguuuuugccauuacguucaauggcgcaaaaaccgcaauuacuuuugcaccaaucuaaua	90	mml-mir-548j-44-5p	124082807	124082827	caaaguaaucacuguuuuugc	mml-mir-548j-44-3p	124082846	124082866	aaaaaccgcaauuacuuuugc
		yes	ENSMMUT00000073920	mml-mir-548j-45	CM002997.3	-	36532167	36532253	uuauauuagguuugugcaaaaguaauugcgguuuuugcuguuacuuuuaauggcaaaaaccgcaauuacuuuugcaccaaccuaaua	87	mml-mir-548j-45-5p	36532184	36532204	aaaaguaauugcgguuuuugc	mml-mir-548j-45-3p	36532221	36532241	aaaaaccgcaauuacuuuugc
		yes	ENSMMUT00000057921	mml-mir-548j-46	CM002985.3	-	92883246	92883358	uauuagguuggugcaaaaguaauugugguuuuugccauuuuaaaaguaauuguuauucuuuuugaagaauaacaaaaaccgcaauuacuuuugcaccaaccuaauaauuucua	113	mml-mir-548j-46-5p	92883260	92883280	aaaaguaauugugguuuuugc	mml-mir-548j-46-3p	92883319	92883339	aaaaaccgcaauuacuuuugc
		yes	ENSMMUT00000049687	mml-mir-548j-47	CM002981.2	-	123695486	123695580	aguaucagguuggugcaaaaguaauugugguuuugcaacuaaaaguaauugcaaaaaccgcaauuacuuuugcagcaaccugauauugagccacu	95	mml-mir-548j-47-5p	123695501	123695521	caaaaguaauugugguuuugc	mml-mir-548j-47-3p	123695538	123695558	aaaaaccgcaauuacuuuugc
		yes	ENSMMUT00000050827	mml-mir-548j-48	CM002981.2	-	98887702	98887792	aaguauuaggcuggugcaaaaguaauugcaguuuuuguuguuacuuuuaauagcaaaaaccgcaauuacuuuugcaccaaguuaauauuaa	91	mml-mir-548j-48-5p	98887718	98887738	caaaaguaauugcaguuuuug	mml-mir-548j-48-3p	98887756	98887776	aaaaaccgcaauuacuuuugc
		yes	ENSMMUT00000058375	mml-mir-548j-49	CM002981.2	-	57690869	57690965	uauuagguuggugcaaaaguaauugugguuuuugccauugcuuuuaauuauuuuuaauggcaaaaaccgcaauuacuuuugcaccaaccuaauaguu	97	mml-mir-548j-49-5p	57690883	57690903	aaaaguaauugugguuuuugc	mml-mir-548j-49-3p	57690930	57690950	aaaaaccgcaauuacuuuugc
		yes	ENSMMUT00000049207	mml-mir-548j-50	CM002983.2	-	143909663	143909761	uuauauuagguaagugcaaaaguuaucguguauuuugccauuacuuucaauggcaaaaaccgcaauuacuuuugcaccaacuuaauaucuugcccucuc	99	mml-mir-548j-50-5p	143909680	143909700	aaaaguuaucguguauuuugc	mml-mir-548j-50-3p	143909717	143909737	aaaaaccgcaauuacuuuugc
		yes	ENSMMUT00000050482	mml-mir-548j-51	CM002984.2	-	165571846	165571932	auguauuaaguuggugcaaaagucauugcauuuuuugucagugaaaguaauggcaaaaaccgcaauuacuuuugcaccgagcuagua	87	mml-mir-548j-51-5p	165571863	165571883	aaaagucauugcauuuuuugu	mml-mir-548j-51-3p	165571900	165571920	aaaaaccgcaauuacuuuugc
		yes	ENSMMUT00000049658	mml-mir-548j-52	CM002984.2	-	90608480	90608570	uuauuagguuggugcaaaaguaauugagguuuuggccauuacacucaauggcaaaaaccgcaauuacuuuugcaccaaccuaauaauuccc	91	mml-mir-548j-52-5p	90608495	90608515	aaaaguaauugagguuuuggc	mml-mir-548j-52-3p	90608532	90608552	aaaaaccgcaauuacuuuugc
		yes	ENSMMUT00000077875	mml-mir-548j-53	CM002980.3	-	164467824	164467923	uauuagguuggugcaaaaauagucaugguuuuugccauugcuuuuacuuaccuuuaauggcaaaaaccgcaauuacuuuugcaccaaccuaacaguugau	100	mml-mir-548j-53-5p	164467838	164467858	aaaaauagucaugguuuuugc	mml-mir-548j-53-3p	164467885	164467905	aaaaaccgcaauuacuuuugc
		yes	ENSMMUT00000049269	mml-mir-548j-54	CM002980.3	-	149501355	149501443	uauuagguuggugcgaaagcagcugugguuuuugcuauuuuuaaauggcaaaaaccgcaauuacuuuugcaccaaccuaaugcaucccu	89	mml-mir-548j-54-5p	149501369	149501389	gaaagcagcugugguuuuugc	mml-mir-548j-54-3p	149501404	149501424	aaaaaccgcaauuacuuuugc
		yes	ENSMMUT00000050877	mml-mir-548j-55	CM002980.3	-	88570352	88570437	acuauuagguuggugcaaaaguaauugcgaauuuugccacuaaaaguaacuguaaaaaccgcaauuacuuuugcacgcaccugaua	86	mml-mir-548j-55-5p	88570368	88570388	aaaaguaauugcgaauuuugc	mml-mir-548j-55-3p	88570405	88570425	aaaaaccgcaauuacuuuugc
		yes	ENSMMUT00000049116	mml-mir-548j-56	CM002988.2	-	90644975	90645068	guaucaggcuggugcaaaaguaauugcaauuucugcaacugaaaguaauggcaaaaaccgcaauuacuuuugcaccaaccuaauagaugucuau	94	mml-mir-548j-56-5p	90644990	90645010	aaaaguaauugcaauuucugc	mml-mir-548j-56-3p	90645027	90645047	aaaaaccgcaauuacuuuugc
		yes	ENSMMUT00000048432	mml-mir-548j-57	CM002990.2	-	8601086	8601172	uauuagguuggugcaaaaguaauugcaguuuuugccauuacuuugaaugguaaaaacugcaauuacuuuugcacuaaccuaauacuu	87	mml-mir-548j-57-5p	8601100	8601120	aaaaguaauugcaguuuuugc	mml-mir-548j-57-3p	8601137	8601157	aaaaacugcaauuacuuuugc
		yes	ENSMMUT00000048501	mml-mir-548j-58	CM002990.2	-	40181252	40181333	uauuagguuggugcaaaaguaucugugguuuuugccauuacuuucaauggaaaaaaccgcaauuauuuuugcaccaaccuaa	82	mml-mir-548j-58-5p	40181267	40181287	aaaguaucugugguuuuugcc	mml-mir-548j-58-3p	40181303	40181323	aaaaaccgcaauuauuuuugc
		yes	ENSMMUT00000048533	mml-mir-548j-59	CM002977.3	-	44805232	44805314	guauuagguuggugcaaaaguaauugcgguuuuugccauuacuuuuaauggaaaaccacaauuacuuuugcaccaaucuaaua	83	mml-mir-548j-59-5p	44805249	44805269	aaguaauugcgguuuuugcca	mml-mir-548j-59-3p	44805282	44805302	gaaaaccacaauuacuuuugc
		yes	ENSMMUT00000048730	mml-mir-548j-60	CM002984.2	-	164427357	164427444	uucuaagguuggugcaaaaguaauugugguuuuugcuauuacuuuuaaaugggaaaaaccacaauuacuuuugcaccaaccaaauauu	88	mml-mir-548j-60-5p	164427373	164427393	aaaguaauugugguuuuugcu	mml-mir-548j-60-3p	164427410	164427430	aaaaaccacaauuacuuuugc
		yes	ENSMMUT00000048731	mml-mir-548j-61	CM002979.2	-	97250619	97250712	ucuuauuauguuagugcaaaaguaauugugguuuuugccauaacuuucaaugucaaaaaccgcaauuacuuuugcaccaaccuaauuguuuacu	94	mml-mir-548j-61-5p	97250637	97250657	aaaguaauugugguuuuugcc	mml-mir-548j-61-3p	97250673	97250693	aaaaaccgcaauuacuuuugc
		yes	ENSMMUT00000049068	mml-mir-548j-62	CM002978.2	-	71569853	71569947	uuuguuagguuugugcaaaaguaacugcgguuuucacuauuacuuuuuaagaccaaaaccacaauuacuuuugcaccaaccuaauauaccugauu	95	mml-mir-548j-62-5p	71569872	71569892	aguaacugcgguuuucacuau	mml-mir-548j-62-3p	71569906	71569926	caaaaccacaauuacuuuugc
		yes	ENSMMUT00000049073	mml-mir-548j-63	CM002977.3	-	190374183	190374273	aacuauuagguuagugcaaaaguaauugcgauuuuuugcuauugaaaguaacggcaaaaacugcaauuacuuuugcaccaaccuaaaacau	91	mml-mir-548j-63-5p	190374201	190374221	aaaguaauugcgauuuuuugc	mml-mir-548j-63-3p	190374238	190374258	aaaaacugcaauuacuuuugc
		yes	ENSMMUT00000049153	mml-mir-548j-64	CM002987.3	-	73900433	73900511	cuggugcaaaaguaugugguuuuaccauuacuuuucaugacaaaaaccacgauuacuuuugcaccaaccuaauaaaacu	79	mml-mir-548j-64-5p	73900438	73900458	gcaaaaguaugugguuuuacc	mml-mir-548j-64-3p	73900474	73900494	aaaaaccacgauuacuuuugc
		yes	ENSMMUT00000049197	mml-mir-548j-65	CM002990.2	-	87567750	87567833	uuauuagguuggugcaaaagcaacugugauuuuugccauuacuuuuaaauagccaaaaccgcaauuacuuuugcaccaaccuaa	84	mml-mir-548j-65-5p	87567766	87567786	aaagcaacugugauuuuugcc	mml-mir-548j-65-3p	87567803	87567823	caaaaccgcaauuacuuuugc
		yes	ENSMMUT00000049274	mml-mir-548j-66	CM002984.2	-	14506457	14506560	auuagguugcugcaaaaguaauugcaguuuuugucauuacuuucaaugccguuacuuuugaaaguaauggcgaaaaucgcaauuacuuuugcaccaacuuaaua	104	mml-mir-548j-66-5p	14506470	14506490	aaaaguaauugcaguuuuugu	mml-mir-548j-66-3p	14506528	14506548	gaaaaucgcaauuacuuuugc
		yes	ENSMMUT00000049338	mml-mir-548j-67	CM002989.3	+	59772594	59772696	cuacuuagguuggugcaaaaguaaucgcggguuuugccauuacuuuuacauuacuuuuaaugucaaaaaccgagauuacuuuugcaccagcguaauacuucua	103	mml-mir-548j-67-5p	59772611	59772631	aaaguaaucgcggguuuugcc	mml-mir-548j-67-3p	59772658	59772678	aaaaaccgagauuacuuuugc
		yes	ENSMMUT00000049423	mml-mir-548j-68	CM002993.2	-	64218698	64218780	aggucagugcaaaaaucauugcaguuuuuuaccauuacuuuuaauggcaaaaacugcaauuacuuuugcaccaaccuaauauu	83	mml-mir-548j-68-5p	64218710	64218730	aaaucauugcaguuuuuuacc	mml-mir-548j-68-3p	64218746	64218766	aaaaacugcaauuacuuuugc
		yes	ENSMMUT00000049424	mml-mir-548j-69	CM002984.2	-	73190894	73190980	aacuauuugguugaugcaaaaguaauugugguuuucaucauuacuuucaauggcaaaaacugcaauuacuuuugcaccaaucuaaua	87	mml-mir-548j-69-5p	73190912	73190932	aaaguaauugugguuuucauc	mml-mir-548j-69-3p	73190948	73190968	aaaaacugcaauuacuuuugc
		yes	ENSMMUT00000049436	mml-mir-548j-70	CM002997.3	+	73147340	73147428	uauuaguuugauguaaaaauaauugugguuuuugcaguuaauauagguaacggcaaaaaucgcaauuacuuuugcaccaaacuaauaua	89	mml-mir-548j-70-5p	73147355	73147375	aaaauaauugugguuuuugca	mml-mir-548j-70-3p	73147394	73147414	aaaaaucgcaauuacuuuugc
		yes	ENSMMUT00000049459	mml-mir-548j-71	CM002987.3	-	62629196	62629290	auuaagcuggugcaaaaguaauugcuuuuaauugcuauuaaaaguaauggcaaaaacugcaauuacuuuugcaccaaccuaauacaugcaagaug	95	mml-mir-548j-71-5p	62629210	62629230	aaaguaauugcuuuuaauugc	mml-mir-548j-71-3p	62629247	62629267	aaaaacugcaauuacuuuugc
		yes	ENSMMUT00000049515	mml-mir-548j-72	CM002997.3	-	78276540	78276616	agguuggugcaaaaguaauugcgguuucugccauacuuuuaauggcaaaaaccgcaaauauuuuugcaccaaccuau	77	mml-mir-548j-72-5p	78276549	78276569	caaaaguaauugcgguuucug	mml-mir-548j-72-3p	78276586	78276606	aaaaaccgcaaauauuuuugc
		yes	ENSMMUT00000049517	mml-mir-548j-73	CM002997.3	+	129610072	129610178	cuauuagguuggugcaaaaguaauuccugauuuugccauuaauuguaaugucaaaacugcaauuacuuuugcaccaaccuaauaauuuacgcucccaccaacagugu	107	mml-mir-548j-73-5p	129610089	129610109	aaguaauuccugauuuugcca	mml-mir-548j-73-3p	129610123	129610143	caaaacugcaauuacuuuugc
		yes	ENSMMUT00000049523	mml-mir-548j-74	CM002987.3	+	88825177	88825276	uauuagguuggugcaaaaguaauugcgguuuuugccacuaaaaguaaugggaaaaacugcaauuacuuuuguaccaaccuaauagcuguguagcuuucua	100	mml-mir-548j-74-5p	88825192	88825212	aaaguaauugcgguuuuugcc	mml-mir-548j-74-3p	88825228	88825248	aaaaacugcaauuacuuuugu
		yes	ENSMMUT00000049549	mml-mir-548j-75	CM002992.3	+	42060176	42060265	auuauuagguugguacaaaaguaauuguguuuuuuugcaucaaaaguaauggcaaaaacugcaauuacuuuugcaccauccuauauuucu	90	mml-mir-548j-75-5p	42060193	42060213	aaaguaauuguguuuuuuugc	mml-mir-548j-75-3p	42060229	42060249	aaaaacugcaauuacuuuugc
		yes	ENSMMUT00000049578	mml-mir-548j-76	CM002981.2	-	156273337	156273422	acuauuagguuggugcaaaauaauugugguuuuugucauuacuauuaauggcaaaaacugcaauuacuuuugcaccagccuaauau	86	mml-mir-548j-76-5p	156273352	156273372	caaaauaauugugguuuuugu	mml-mir-548j-76-3p	156273389	156273409	aaaaacugcaauuacuuuugc
		yes	ENSMMUT00000049587	mml-mir-548j-77	CM002991.3	-	28067273	28067373	uaaggucaaugcaaaaguaaucgcgguuuuugccauuacuuuuaauggcauuacuuuuuaaugcaaaaaccgcgauuacuuuugcaccaacuuaauauaug	101	mml-mir-548j-77-5p	28067286	28067306	aaaguaaucgcgguuuuugcc	mml-mir-548j-77-3p	28067337	28067357	aaaaaccgcgauuacuuuugc
		yes	ENSMMUT00000049603	mml-mir-548j-78	CM002990.2	-	87824788	87824868	auuagauuggugcaaaaguaauugcaguuuuugcaauuacuuuaaauggcaaaaacugcaauuacuuuugcaccaaccuaa	81	mml-mir-548j-78-5p	87824802	87824822	aaaguaauugcaguuuuugca	mml-mir-548j-78-3p	87824838	87824858	aaaaacugcaauuacuuuugc
		yes	ENSMMUT00000049613	mml-mir-548j-79	CM002987.3	-	70748694	70748787	guuuguauuagguuggugcaaaaguaauugcgguuuuugcaguaauuuuaauggcaaaaaccgcaauuacuuuuugcacccaccuaauacaucu	94	mml-mir-548j-79-5p	70748714	70748734	aaaguaauugcgguuuuugca	mml-mir-548j-79-3p	70748749	70748769	aaaaaccgcaauuacuuuuug
		yes	ENSMMUT00000049724	mml-mir-548j-80	CM002983.2	+	53652151	53652245	ugaaauauuauuagguuagggcaaaaguaauugcgguuuuugccauuaaaaguaaugguaaaaaccgcaauuaauuuugcaucaacuuaauaucu	95	mml-mir-548j-80-5p	53652173	53652193	aaaaguaauugcgguuuuugc	mml-mir-548j-80-3p	53652210	53652230	aaaaaccgcaauuaauuuugc
		yes	ENSMMUT00000049733	mml-mir-548j-81	CM002990.2	+	77234097	77234187	aacauauuagguuggugcaaaaguaacugcaguguuugucauuacuuuuaauagcaaaaacugcaauuacuuuugcacagaccuaauauuu	91	mml-mir-548j-81-5p	77234116	77234136	aaaguaacugcaguguuuguc	mml-mir-548j-81-3p	77234152	77234172	aaaaacugcaauuacuuuugc
		yes	ENSMMUT00000049773	mml-mir-548j-82	CM002982.3	-	144801458	144801554	gaaaguggcgauuuagguuggugcaaaaguaauuguagcuuuugccauuaaaaguaauugcaaaaacugcgauuacuuuugcaccagucuaauagaa	97	mml-mir-548j-82-5p	144801483	144801503	aaaguaauuguagcuuuugcc	mml-mir-548j-82-3p	144801519	144801539	aaaaacugcgauuacuuuugc
		yes	ENSMMUT00000049790	mml-mir-548j-83	CM002997.3	-	37549365	37549457	aguauuagguuggugcaaaaguaauugcgguuuuugccauuaaaaauauggcaaaaaccgcaauaacuuuugcacaaaccuaauagcuggcca	93	mml-mir-548j-83-5p	37549381	37549401	aaaaguaauugcgguuuuugc	mml-mir-548j-83-3p	37549417	37549437	aaaaaccgcaauaacuuuugc
		yes	ENSMMUT00000049798	mml-mir-548j-84	CM002990.2	-	95566330	95566417	aauaccauuagguuggugcaaaaauaauugcaguuuuaccauuacguccaacagcaaaaacugcaauuacuuuugcaccaaccuaaua	88	mml-mir-548j-84-5p	95566349	95566369	aaaaauaauugcaguuuuacc	mml-mir-548j-84-3p	95566385	95566405	aaaaacugcaauuacuuuugc
		yes	ENSMMUT00000049896	mml-mir-548j-85	CM002989.3	-	87679780	87679868	agaauuacuagguuggugccagaguaauugcaguuuuuaccguuacuuucaauggcaaaaacugcaauuacuuuugcaccaacauaaua	89	mml-mir-548j-85-5p	87679800	87679820	agaguaauugcaguuuuuacc	mml-mir-548j-85-3p	87679836	87679856	aaaaacugcaauuacuuuugc
		yes	ENSMMUT00000050465	mml-mir-548j-86	CM002983.2	-	33764217	33764310	auggaaauauuuagguuggugaaaaggauuugcaguuuuugccauuacuuuuaguggcaaaaaacgcaauuacuuuugcaccaauuuaauauuu	94	mml-mir-548j-86-5p	33764238	33764258	aaaaggauuugcaguuuuugc	mml-mir-548j-86-3p	33764275	33764295	aaaaaacgcaauuacuuuugc
		yes	ENSMMUT00000050587	mml-mir-548j-87	CM002988.2	-	86051037	86051120	uuagguuggugcaaaaguaauugcgguuuuugccauuacguucaauggcaaaaccgcaauuacuuuugcaccaaccuaauagaa	84	mml-mir-548j-87-5p	86051050	86051070	aaaguaauugcgguuuuugcc	mml-mir-548j-87-3p	86051085	86051105	caaaaccgcaauuacuuuugc
		yes	ENSMMUT00000051063	mml-mir-548j-88	CM002985.3	+	46472409	46472500	aguuuauauuaguuuggugcaaaaguaauugcgauuuuugcccuuacuuucaaugacaaaaacugcaauuacuuuugcaccaaucaaauaaa	92	mml-mir-548j-88-5p	46472429	46472449	aaaaguaauugcgauuuuugc	mml-mir-548j-88-3p	46472466	46472486	aaaaacugcaauuacuuuugc
		yes	ENSMMUT00000051073	mml-mir-548j-89	CM002983.2	+	153637726	153637813	guauuagguuggugcaaaaguaauugcggguuuugacauuacuuuuaauggcaaaaacugcaauuacuuuugcaucagccuaauauuu	88	mml-mir-548j-89-5p	153637742	153637762	aaaguaauugcggguuuugac	mml-mir-548j-89-3p	153637778	153637798	aaaaacugcaauuacuuuugc
		yes	ENSMMUT00000050200	mml-mir-548j-90	CM002988.2	-	13986886	13986970	uauuaaggucggugcaaaaguaauugugauuuuggccauaaaauaauggcaaaaaccgcaauuacuuuugcaccaaccuaauaaa	85	mml-mir-548j-90-5p	13986901	13986921	aaaaguaauugugauuuuggc	mml-mir-548j-90-3p	13986936	13986956	aaaaaccgcaauuacuuuugc
		yes	ENSMMUT00000050341	mml-mir-548j-91	CM002979.2	-	110368386	110368478	aaacauuauguuggugcaauaauaauugaggguuuugccauuaaaaguaauugcaaaaaccgcaauuacuuuugcaccagccuaauaauuuca	93	mml-mir-548j-91-5p	110368404	110368424	auaauaauugaggguuuugcc	mml-mir-548j-91-3p	110368440	110368460	aaaaaccgcaauuacuuuugc
		yes	ENSMMUT00000051207	mml-mir-548j-92	CM002983.2	-	8553837	8553925	auuauuaaguuugugcaaaaguaauugcaguuuuucccauggaaaguaauggccaaaaccacaauuacuuuugcaccaaccuaauagcu	89	mml-mir-548j-92-5p	8553854	8553874	aaaguaauugcaguuuuuccc	mml-mir-548j-92-3p	8553890	8553910	caaaaccacaauuacuuuugc
		yes	ENSMMUT00000052692	mml-mir-548j-93	CM002978.2	+	51836509	51836593	uauuagguugguacaaaaguaauggcgguuuuugcaauuacuuuuacuggcaaaaacugcaauuacuuuugcaccaaccuaauau	85	mml-mir-548j-93-5p	51836523	51836543	aaaaguaauggcgguuuuugc	mml-mir-548j-93-3p	51836560	51836580	aaaaacugcaauuacuuuugc
		yes	ENSMMUT00000054322	mml-mir-548j-94	CM002997.3	+	143033224	143033311	uauuagguaggugcaaaaguaauugcaguuuuugcaaauacuuuuaauggugaaaacugcaauuacuuuugcaccaaucuaauacuaa	88	mml-mir-548j-94-5p	143033238	143033258	aaaaguaauugcaguuuuugc	mml-mir-548j-94-3p	143033275	143033295	gaaaacugcaauuacuuuugc
		yes	ENSMMUT00000055340	mml-mir-548j-95	CM002981.2	-	12999488	12999590	agucagacaguuauuagguuggugcaaaaguaaucacgguuuuugccauuaaauucaauagcaaaaacugcgauuacuuuugcaccaaccuaauaucuccacu	103	mml-mir-548j-95-5p	12999514	12999534	aaaguaaucacgguuuuugcc	mml-mir-548j-95-3p	12999550	12999570	aaaaacugcgauuacuuuugc
		yes	ENSMMUT00000056061	mml-mir-548j-96	CM002992.3	-	74143891	74143971	guuggugaaaaaguaauugcaguuuuugccacugaaaguaguggccaaaaccgcaauuacuuuugcaccaaacuaauauau	81	mml-mir-548j-96-5p	74143899	74143919	aaaaguaauugcaguuuuugc	mml-mir-548j-96-3p	74143936	74143956	caaaaccgcaauuacuuuugc
		yes	ENSMMUT00000056817	mml-mir-548j-97	CM002986.2	-	40939489	40939577	aauauuagguuggugcaaaaguaauugcgguuuuugccacggaaaguaauggcaaaaaccgcaauuacuuuuguaccaaacuaauauau	89	mml-mir-548j-97-5p	40939505	40939525	aaaaguaauugcgguuuuugc	mml-mir-548j-97-3p	40939542	40939562	aaaaaccgcaauuacuuuugu
		yes	ENSMMUT00000057082	mml-mir-548j-98	CM002986.2	-	53086002	53086092	aauuuauuagaugggugcaaaaguaauugcaguuuuugccauuacuuuuaaugacaaaaacugcaauuacuuuugcaccaaccuacauauu	91	mml-mir-548j-98-5p	53086021	53086041	aaaguaauugcaguuuuugcc	mml-mir-548j-98-3p	53086057	53086077	aaaaacugcaauuacuuuugc
		yes	ENSMMUT00000057403	mml-mir-548j-99	CM002983.2	+	13602156	13602257	uauuagguuggugcaaaaguaauugcgguuuugccauuaaaaguaauuguggugcccucuuuuuaauaguaaaaccgcaauuacuuuugcaccaaccuaaua	102	mml-mir-548j-99-5p	13602171	13602191	aaaguaauugcgguuuugcca	mml-mir-548j-99-3p	13602225	13602245	uaaaaccgcaauuacuuuugc
		yes	ENSMMUT00000058158	mml-mir-548j-100	CM002980.3	-	71896385	71896488	uauuagguuggugcaaaaaguaauugcaguuuuugccauuacuuccacuggcaaaaauuacuucuaauggccaaaaccacaauuacuuuugcaccaaccuaaua	104	mml-mir-548j-100-5p	71896400	71896420	aaaaguaauugcaguuuuugc	mml-mir-548j-100-3p	71896456	71896476	caaaaccacaauuacuuuugc
		yes	ENSMMUT00000059135	mml-mir-548j-101	CM002978.2	+	81177029	81177140	cuguuagguuggugcaaaaguacuugugguuuuugccauuauuuuuaauuauuuugccuuuacuuuuaauggcaaaaacagcaauuacuuuugaagauuagaaugcuuaaua	112	mml-mir-548j-101-5p	81177045	81177065	aaaguacuugugguuuuugcc	mml-mir-548j-101-3p	81177101	81177121	caaaaacagcaauuacuuuug
		yes	ENSMMUT00000062445	mml-mir-548j-102	CM002997.3	-	95049850	95049937	uauuagguuggugcaaaaguuauugugauuuuugcuauuaaaacuguuugcaaaaacagcaauuacuuuugcaccaaccuaauagaag	88	mml-mir-548j-102-5p	95049864	95049884	aaaaguuauugugauuuuugc	mml-mir-548j-102-3p	95049901	95049921	aaaaacagcaauuacuuuugc
		yes	ENSMMUT00000062696	mml-mir-548j-103	CM002977.3	-	150420220	150420309	aaguauucgguuggugcaaaaguaauugcgguuuuugccauugaaaguaauggcaaaaaccgcaauuacuuuugcaccaccuuaauagcu	90	mml-mir-548j-103-5p	150420237	150420257	aaaaguaauugcgguuuuugc	mml-mir-548j-103-3p	150420274	150420294	aaaaaccgcaauuacuuuugc
		yes	ENSMMUT00000063113	mml-mir-548j-104	CM002988.2	-	101375227	101375324	uauuagguugaugccaaaguaaucacgguuuucgccauuauguuuaauuauguauguuuaauggcaaaaaucgcaauuacuuuugcacccaccuaaua	98	mml-mir-548j-104-5p	101375241	101375261	caaaguaaucacgguuuucgc	mml-mir-548j-104-3p	101375292	101375312	aaaaaucgcaauuacuuuugc
		yes	ENSMMUT00000063267	mml-mir-548j-105	CM002980.3	-	76845058	76845150	uauuagguuggugcaaaaguaauuguaguuuuuacuacugaaagcaauggcagaaaccgcaauuacuuuugcaccaaccucauauaauggaau	93	mml-mir-548j-105-5p	76845073	76845093	aaaguaauuguaguuuuuacu	mml-mir-548j-105-3p	76845109	76845129	agaaaccgcaauuacuuuugc
		yes	ENSMMUT00000063388	mml-mir-548j-106	CM002993.2	+	44937495	44937602	uauuugguuggugcaaaaguaaucaugguuuuugccauuuaaaguacuuuugcuguuacuuuaaaugacaaaaacugcgauuacuuuugcaucaaccaaauauuuucu	108	mml-mir-548j-106-5p	44937510	44937530	aaaguaaucaugguuuuugcc	mml-mir-548j-106-3p	44937564	44937584	aaaaacugcgauuacuuuugc
		yes	ENSMMUT00000064158	mml-mir-548j-107	CM002982.3	+	58657393	58657483	aaguauuaaauuggugcaaaaguaauugugguuuuuaccauuacuuuuaauagcaaaaacugcaauuacuuuugcaccaaccuaauaugua	91	mml-mir-548j-107-5p	58657412	58657432	aaguaauugugguuuuuacca	mml-mir-548j-107-3p	58657447	58657467	aaaaacugcaauuacuuuugc
		yes	ENSMMUT00000064436	mml-mir-548j-108	CM002996.3	-	34190343	34190428	auguauuagguuggugcaaaaguaauuccgguuuuugucauuccuuuuaauagcaaaacugcaauuacuuuugcacagacugaaua	86	mml-mir-548j-108-5p	34190362	34190382	aaguaauuccgguuuuuguca	mml-mir-548j-108-3p	34190396	34190416	caaaacugcaauuacuuuugc
		yes	ENSMMUT00000064437	mml-mir-548j-109	CM002987.3	+	8775380	8775468	guauuaggcuggugcuaaagugacugcgguuuuugcccuuacuuuuaauugcaaaaacugccauuacuuuugcaccaaccuuaauaaau	89	mml-mir-548j-109-5p	8775397	8775417	aagugacugcgguuuuugccc	mml-mir-548j-109-3p	8775432	8775452	aaaaacugccauuacuuuugc
		yes	ENSMMUT00000064812	mml-mir-548j-110	CM002983.2	-	122001349	122001432	uauuagguuggugcaaaaguaauugcaauucuugccauuaguuuuaauggcaaaacugcaauuacuuuugcaccaaccuaauau	84	mml-mir-548j-110-5p	122001364	122001384	aaaguaauugcaauucuugcc	mml-mir-548j-110-3p	122001399	122001419	caaaacugcaauuacuuuugc
		yes	ENSMMUT00000065501	mml-mir-548j-111	CM002986.2	+	106235628	106235707	ugcaaaaguaauugcggauuuugccauuaauggcaaauggcaaaacccgcaauuacuuuugcaccagccugauaauuauu	80	mml-mir-548j-111-5p	106235631	106235651	aaaaguaauugcggauuuugc	mml-mir-548j-111-3p	106235669	106235689	aaaacccgcaauuacuuuugc
		yes	ENSMMUT00000066476	mml-mir-548j-112	CM002997.3	+	126605294	126605405	gcauacuaucagguuggugcaaaaguaauugugguuuuugccauuaaaaguaacggcaaaaacugcaauuacuuuugcaccaaccuaauauuuucugacaaauaucacaacu	112	mml-mir-548j-112-5p	126605314	126605334	aaaaguaauugugguuuuugc	mml-mir-548j-112-3p	126605351	126605371	aaaaacugcaauuacuuuugc
		yes	ENSMMUT00000067059	mml-mir-548j-113	CM002989.3	-	105214481	105214573	agugguaaguauuagguuggugcgaaaguaauugcgguuuuugccaucgaaagugauggccaaaaccgcaauuacuuuugcaccaaccuaaua	93	mml-mir-548j-113-5p	105214504	105214524	gaaaguaauugcgguuuuugc	mml-mir-548j-113-3p	105214541	105214561	caaaaccgcaauuacuuuugc
		yes	ENSMMUT00000067317	mml-mir-548j-114	CM002985.3	+	10688067	10688156	guauuagguuggugcaaaaguaauuuugguuuuuguuguugccuuuaauggcaaaaacagcaauuacuuuugcaccaaccuaacauauuu	90	mml-mir-548j-114-5p	10688082	10688102	aaaaguaauuuugguuuuugu	mml-mir-548j-114-3p	10688119	10688139	aaaaacagcaauuacuuuugc
		yes	ENSMMUT00000067913	mml-mir-548j-115	CM002978.2	-	66403389	66403478	aauuauuagguugaugcgaaaguaauugcaguuuuugcuauugaaaguaauugcaaaaaccgcaauuacuuuugcaccgaccuaacaaau	90	mml-mir-548j-115-5p	66403407	66403427	aaaguaauugcaguuuuugcu	mml-mir-548j-115-3p	66403443	66403463	aaaaaccgcaauuacuuuugc
		yes	ENSMMUT00000068090	mml-mir-548j-116	CM002997.3	+	120567970	120568058	gauuacauuagguuggugcaaaaguaauugugguuuuugccguuacugccaauggcaaaaacugcaauuacuuuuguaucaaccuaaga	89	mml-mir-548j-116-5p	120567990	120568009	aaaguaauugugguuuuugc	mml-mir-548j-116-3p	120568026	120568045	aaaaacugcaauuacuuuug
		yes	ENSMMUT00000068676	mml-mir-548j-117	CM002980.3	-	43103490	43103574	uucauuagguuggugcaaagguuauugcgguuuugccauuacuuucaauggcaaaaaccgcaauaacuuuugcaccaaccuaaau	85	mml-mir-548j-117-5p	43103505	43103525	caaagguuauugcgguuuugc	mml-mir-548j-117-3p	43103542	43103562	aaaaaccgcaauaacuuuugc
		yes	ENSMMUT00000068935	mml-mir-548j-118	CM002983.2	+	154121656	154121738	uaucaaguuggugcaaaaguaauugcgguuuuugucauuacuuuuaauggcaaaaccgcaauuacuuuugcaccaaccugaua	83	mml-mir-548j-118-5p	154121671	154121691	aaaguaauugcgguuuuuguc	mml-mir-548j-118-3p	154121706	154121726	caaaaccgcaauuacuuuugc
		yes	ENSMMUT00000069681	mml-mir-548j-119	CM002986.2	-	102933543	102933637	uuaggaugauauucaguuggugcaaaaguaauugugguuuuugcaauuacuuuuaauuguaaaaaccucaauuacuuuugcaccaacauaauaau	95	mml-mir-548j-119-5p	102933566	102933586	aaaaguaauugugguuuuugc	mml-mir-548j-119-3p	102933603	102933623	aaaaaccucaauuacuuuugc
		yes	ENSMMUT00000069994	mml-mir-548j-120	CM002997.3	-	133551548	133551633	gcaucaaguuggugcaaaaguuacugcaguuuuugccacugaaaguaaugacaaaaaccgcaaucacuuuugcaccaaccuaauag	86	mml-mir-548j-120-5p	133551564	133551584	aaaguuacugcaguuuuugcc	mml-mir-548j-120-3p	133551600	133551620	aaaaaccgcaaucacuuuugc
		yes	ENSMMUT00000073582	mml-mir-548j-121	CM002981.2	+	40224633	40224726	gcuuuuauuagguuggugcaaaagugauugcaguuuuuauaguuacauuuaauggcaaaaacugcaauuacuuuugcaccaaccuaaguauuuu	94	mml-mir-548j-121-5p	40224655	40224675	agugauugcaguuuuuauagu	mml-mir-548j-121-3p	40224689	40224709	aaaaacugcaauuacuuuugc
		yes	ENSMMUT00000075170	mml-mir-548j-122	CM002978.2	-	73392955	73393044	guuuauauuagguuggugcaaaaguaauugugguuuuugccauuacuuucaauggcaaaacugcaauuacuuuugcaccaaccuaauaga	90	mml-mir-548j-122-5p	73392975	73392995	aaaguaauugugguuuuugcc	mml-mir-548j-122-3p	73393010	73393030	caaaacugcaauuacuuuugc
		yes	ENSMMUT00000076703	mml-mir-548j-123	CM002985.3	-	124796408	124796501	aguauuagauuggugcaaaaguaauuguaguuuuugcauugaaaguaauagcaaaaaccgcaaguacuuuugcaccaaccuaauaaaucaaaau	94	mml-mir-548j-123-5p	124796424	124796444	aaaaguaauuguaguuuuugc	mml-mir-548j-123-3p	124796460	124796480	aaaaaccgcaaguacuuuugc
		yes	ENSMMUT00000077158	mml-mir-548j-124	CM002982.3	+	33464179	33464280	uaucagguuggugcaaaaguaaugcggcuuuugccauuauuuuuaauuauuuaguuuuaauggccaaaaccucaauuacuuuugcaccaaccuaauagaugc	102	mml-mir-548j-124-5p	33464193	33464213	aaaaguaaugcggcuuuugcc	mml-mir-548j-124-3p	33464243	33464263	caaaaccucaauuacuuuugc
		yes	ENSMMUT00000077836	mml-mir-548j-125	CM002988.2	+	37934624	37934716	uaauauuagguuggugcaaaaguaauugcgauuuuugucaguacuuucaauggcaaaaacugcaauuacuuuugcaccaaccuaauaguuuag	93	mml-mir-548j-125-5p	37934641	37934661	aaaaguaauugcgauuuuugu	mml-mir-548j-125-3p	37934678	37934698	aaaaacugcaauuacuuuugc
		yes	ENSMMUT00000075668	mml-miR-548j-126	CM002983.2	+	103390398	103390495	gcuauuagguuggugcaaaaguaauuguggguuuugccauuacuauuuuuaguagacauuacuuuuaauggcaaaaccugcaauuacuuuugcaccaa	98	mml-miR-548j-126-5p	103390414	103390435	aaaaguaauuguggguuuugcc	mml-miR-548j-126-3p	103390469	103390490	caaaaccugcaauuacuuuugc
		yes	ENSMMUT00000056153	mml-miR-548j-127	CM002983.2	+	135350284	135350355	auugguguaaaaguaauugcagguuaugccauuaaaaguaaugguaaaaauugcaauuacuuuuacauuaac	72	mml-miR-548j-127-5p	135350293	135350313	aaaguaauugcagguuaugcc	mml-miR-548j-127-3p	135350329	135350349	aaaaauugcaauuacuuuuac
		yes	ENSMMUT00000048538	mml-miR-548j-128	CM002989.3	-	34619100	34619183	uuagguuggugcaaaaguaauugcggguuuugcccuuacuucaaccagcaaaaaaugcaauuacuuuugcaccaaccuaauacu	84	mml-miR-548j-128-5p	34619110	34619130	gcaaaaguaauugcggguuuu	mml-miR-548j-128-3p	34619151	34619171	aaaaugcaauuacuuuugcac
		yes	ENSMMUT00000048753	mml-miR-548j-129	CM002979.2	-	6085234	6085319	uccauuagguugcugcaaaaguaauugcggucuuugccauuacuuucaauggcaaaaauugcaaaacuuuugcaccaacugaauac	86	mml-miR-548j-129-5p	6085248	6085268	gcaaaaguaauugcggucuuu	mml-miR-548j-129-3p	6085289	6085309	aaauugcaaaacuuuugcacc
		yes	ENSMMUT00000049135	mml-miR-548j-130	CM002991.3	-	71569293	71569387	ucgguuuguauuagguugaugcaaaaguaauugcgauuuuugccauuacuuucaauggcaaaaacugcaauuacuuuuucaucaacuuaauaguu	95	mml-miR-548j-130-5p	71569313	71569333	gcaaaaguaauugcgauuuuu	mml-miR-548j-130-3p	71569354	71569374	aaacugcaauuacuuuuucau
		yes	ENSMMUT00000049157	mml-miR-548j-131	CM002989.3	-	57161935	57162020	uuaugagguuggugcaaaaguaauugcaguuuuugccauuacuuucaaugguaaaaaccacaauuacuuuagcaccaaccuaaaac	86	mml-miR-548j-131-5p	57161948	57161968	gcaaaaguaauugcaguuuuu	mml-miR-548j-131-3p	57161989	57162009	aaaccacaauuacuuuagcac
		yes	ENSMMUT00000049192	mml-miR-548j-132	CM002991.3	-	72368956	72369049	ugguauguauuagguuggugcaaaagucauugcgguuuuugccauuacuuuuagugccaaaaaucgcaauuacuuuuauaccaacuuaauacau	94	mml-miR-548j-132-5p	72368975	72368995	gcaaaagucauugcgguuuuu	mml-miR-548j-132-3p	72369016	72369036	aaaucgcaauuacuuuuauac
		yes	ENSMMUT00000049309	mml-miR-548j-133	CM002987.3	+	114959086	114959178	uaacaucauuauuagguuagugcaaaaguaauugcggguuuugccauuaaaaaaguuaaaacugcaauuauuuuugcaccaaccuaauauuuu	93	mml-miR-548j-133-5p	114959107	114959127	gcaaaaguaauugcggguuuu	mml-miR-548j-133-3p	114959145	114959165	aacugcaauuauuuuugcacc
		yes	ENSMMUT00000049395	mml-miR-548j-134	CM002980.3	+	27190801	27190898	uccagaguuauaaaccuauagcuuggugcaaaaguaauugcggucuuugccauugaaaguaauggcaauacugcaauuacuuuugcaccagucuaaua	98	mml-miR-548j-134-5p	27190828	27190848	gcaaaaguaauugcggucuuu	mml-miR-548j-134-3p	27190869	27190889	uacugcaauuacuuuugcacc
		yes	ENSMMUT00000049418	mml-miR-548j-135	CM002981.2	-	109802255	109802349	auaggcaacuauuagguuggugcaaaaauaacugcgguuuuugcccuuacuuuuaauagcagaaaccgcaauuaauuuugcauaaaccuaauauu	95	mml-miR-548j-135-5p	109802276	109802296	gcaaaaauaacugcgguuuuu	mml-miR-548j-135-3p	109802317	109802337	aaaccgcaauuaauuuugcau
		yes	ENSMMUT00000049504	mml-miR-548j-136	CM002989.3	-	92827199	92827288	auuagcuauuagguuggugcaaaacuaauugcaguuuuugucauuguuuuuaauggcaaaaacugcaauuacuuuugcaccaaauagaua	90	mml-miR-548j-136-5p	92827219	92827239	aaaacuaauugcaguuuuugu	mml-miR-548j-136-3p	92827256	92827276	aaaaacugcaauuacuuuugc
		yes	ENSMMUT00000049513	mml-miR-548j-137	CM002985.3	+	531003	531115	uggcuaaaauguguugauuguaaugguuccuauuuugauuaauaaagaugugguugagccuauuauaaugauuuaaaauucaugguucaaaacugcaauuacuuuugcaccaa	113	mml-miR-548j-137-5p	NA	NA	NA	mml-miR-548j-137-3p	531090	531110	caaaacugcaauuacuuuugc
		yes	ENSMMUT00000049562	mml-miR-548j-138	CM002982.3	-	120157352	120157461	uacuauuaggcuugugcaaaaguaauugcggcuuuuggcuauuaaaagggauggcaaaaaacgcaauuacuuugucccaaccuaauaaauacacauguucaaaauuuugu	110	mml-miR-548j-138-5p	120157367	120157387	gcaaaaguaauugcggcuuuu	mml-miR-548j-138-3p	120157409	120157429	aaaacgcaauuacuuuguccc
		yes	ENSMMUT00000049585	mml-miR-548j-139	CM002984.2	+	172181296	172181398	aguuucuauucuauuaggucgguacaaaaguaauugcggguuuugccauuaaaaguaauggcaaauuagcaauugcuguugcaccaacauaauaucugauauc	103	mml-miR-548j-139-5p	172181320	172181339	caaaaguaauugcggguuuu	mml-miR-548j-139-3p	NA	NA	NA
		yes	ENSMMUT00000049605	mml-miR-548j-140	CM002987.3	-	54225468	54225563	uauuagguuggugcaaaaguaauugcgauuuuugccacuugaaaguaauggcaaaaacugcaauuacuuuugcaccaaccuaauagaaagccagug	96	mml-miR-548j-140-5p	NA	NA	NA	mml-miR-548j-140-3p	54225520	54225540	aaaaacugcaauuacuuuugc
		yes	ENSMMUT00000049662	mml-miR-548j-141	CM002995.2	+	1877666	1877780	uggcaaaaauguguugauugcaaugguuccuauuuugauuaauaaagguauauuugagccuaguuacaaugauuuaaaaaucaugguccaaaacugcaauuacuuuugcaccaac	115	mml-miR-548j-141-5p	NA	NA	NA	mml-miR-548j-141-3p	1877754	1877774	caaaacugcaauuacuuuugc
		yes	ENSMMUT00000049671	mml-miR-548j-142	CM002990.2	-	12919090	12919173	uauuauguuggugcaaaaguaauugcggucuuugccauuacuuucaauggcaaaaauugcaaaacuuuugcaccaacugaauac	84	mml-miR-548j-142-5p	12919102	12919122	gcaaaaguaauugcggucuuu	mml-miR-548j-142-3p	12919143	12919163	aaauugcaaaacuuuugcacc
		yes	ENSMMUT00000049676	mml-miR-548j-143	CM002987.3	-	47281346	47281460	uggcaaaaauguguugauuguaaugguucccauuuugauuaauaaagauggguuuaagccuaguuuuaaugauuuaaaauucaugguccaaaaccgcaauuacuuuugcaccaac	115	mml-miR-548j-143-5p	NA	NA	NA	mml-miR-548j-143-3p	47281434	47281454	caaaaccgcaauuacuuuugc
		yes	ENSMMUT00000049718	mml-miR-548j-144	CM002978.2	+	69345618	69345720	uucugacguauuauguugguaaaaaaguaauugcgguuuuugccauugaaaguaagggcaaaaccacaauuacuuuuguaccaaccuaauagaacuccugucu	103	mml-miR-548j-144-5p	69345640	69345660	aaaaguaauugcgguuuuugc	mml-miR-548j-144-3p	69345677	69345697	aaaaccacaauuacuuuugua
		yes	ENSMMUT00000049745	mml-miR-548j-145	CM002982.3	+	125047893	125047984	agucugguuauuagguuggugcaaaaguaauugcgguuuuugccauugaaaguaauggugaagacugcaauuacuuuugcaccaaccuauaa	92	mml-miR-548j-145-5p	125047913	125047933	gcaaaaguaauugcgguuuuu	mml-miR-548j-145-3p	125047954	125047974	agacugcaauuacuuuugcac
		yes	ENSMMUT00000049762	mml-miR-548j-146	CM002977.3	-	91344555	91344669	uggcaaaaauguguugauugcaaugguuccuaucuugauuaauaaagauguguuugagccuaguuacaaugauuuaaaauucacgguccaaaacugcaauuacuuuugcaccaac	115	mml-miR-548j-146-5p	NA	NA	NA	mml-miR-548j-146-3p	91344643	91344663	caaaacugcaauuacuuuugc
		yes	ENSMMUT00000049851	mml-miR-548j-147	CM002993.2	-	71153581	71153670	auguauuagguuggugcaaaacuaauuguaguuuuaccauuacuuucaaugguaaaaacugaaauuacuuuugcaccaaccuaauaauua	90	mml-miR-548j-147-5p	71153597	71153617	caaaacuaauuguaguuuuac	mml-miR-548j-147-3p	71153634	71153654	aaaaacugaaauuacuuuugc
		yes	ENSMMUT00000050443	mml-miR-548j-148	CM002982.3	-	12833122	12833208	uauuagguuggugcaaaaguaauugcaguuuuugccauuauuuuuauggaaaaaacguaauuacuuuugcaccaaccuaauaguuua	87	mml-miR-548j-148-5p	12833134	12833154	gcaaaaguaauugcaguuuuu	mml-miR-548j-148-3p	12833174	12833194	aaacguaauuacuuuugcacc
		yes	ENSMMUT00000051055	mml-miR-548j-149	CM002977.3	-	23102164	23102252	guauuagguuggugcaaaaguugcugaguuuuugccauuaaaaguaauggcaagaaccgcaauuacuuuugcaccaacuuaauaacugc	89	mml-miR-548j-149-5p	23102178	23102198	caaaaguugcugaguuuuugc	mml-miR-548j-149-3p	23102215	23102235	aagaaccgcaauuacuuuugc
		yes	ENSMMUT00000053870	mml-miR-548j-150	CM002984.2	-	32835582	32835677	gaaugagauguguuagguugaugcaaaaguaauugcgguuuuugccauugaaaggaauggcaaaaaccacaauuaauuuugcaccaaccuaauaaa	96	mml-miR-548j-150-5p	32835604	32835624	gcaaaaguaauugcgguuuuu	mml-miR-548j-150-3p	32835645	32835665	aaaccacaauuaauuuugcac
		yes	ENSMMUT00000056399	mml-miR-548j-151	CM002981.2	+	111335316	111335404	uauuagguuggugcaaaaguaauugcaguuuuugcuauugcuuuuaaauggcaaaaaccugcaguuacuuuuugcaccaaccaauauuu	89	mml-miR-548j-151-5p	111335328	111335348	gcaaaaguaauugcaguuuuu	mml-miR-548j-151-3p	111335370	111335390	aaaccugcaguuacuuuuugc
		yes	ENSMMUT00000056869	mml-miR-548j-152	CM002983.2	+	113332878	113332956	uauuggguuggugcaaaaguaauugcgguuuuuaaaaguaaugaccgaaaaccacaauugcuuuugcaccaaccuaaua	79	mml-miR-548j-152-5p	113332891	113332911	caaaaguaauugcgguuuuua	mml-miR-548j-152-3p	113332925	113332945	aaaaccacaauugcuuuugca
		yes	ENSMMUT00000063169	mml-miR-548j-153	CM002979.2	+	82001682	82001771	aaguauuagguuggugaaaaguaauugcgguuuuugccauuggaaguaauagcaaauacugcaauuacuuuugcaccaaccuauaacuug	90	mml-miR-548j-153-5p	82001698	82001717	aaaaguaauugcgguuuuug	mml-miR-548j-153-3p	82001736	82001755	aauacugcaauuacuuuugc
		yes	ENSMMUT00000070317	mml-miR-548j-154	CM002981.2	-	94529143	94529233	aaauauuagguuggugcaaaaguaauugcgguuuuugucauuaaaaguaauggcaaaaaccacaauuacuauaacuugucuuaugcuuaau	91	mml-miR-548j-154-5p	94529158	94529178	gcaaaaguaauugcgguuuuu	mml-miR-548j-154-3p	94529199	94529219	aaaccacaauuacuauaacuu
		yes	ENSMMUT00000078973	mml-miR-548j-155	CM002993.2	-	11357860	11357947	guauuagguuggugcaaaaguaauugcguuuuuugucauuacuuucaauggcaaacaccgcaauuacuuuugcaccaaccuaauauaa	88	mml-miR-548j-155-5p	11357875	11357895	aaaaguaauugcguuuuuugu	mml-miR-548j-155-3p	11357912	11357932	aaacaccgcaauuacuuuugc
yes				mml-miR-548n-1	CM002991.3	-	99942639	99942789	gcagauucacagcuaaauucuaccagauguacaaggaagaacuauuaugugcaaaaguaauuguggauuuugccauugaagguaauggcaaaaacugaaaucacuuuugcacuaaugauaccaguccuucugaaacuggcugagaaacuca	151	mml-miR-548n-1-5p	99942691	99942711	aaaaguaauuguggauuuugc	mml-miR-548n-1-3p	99942728	99942748	aaaaacugaaaucacuuuugc
yes				mml-miR-548n-2	CM002986.2	+	22748618	22748768	cacucagucacaggcaucuagaauccuaaaaauaugagguuggugcaaaaguaauuguggauuuugcuauuacuuuacuuucaauggcaaaaaccacaauuaauuuugcaccaaccucauauccuauuuggaagauacuuacagaucaguu	151	mml-miR-548n-2-5p	22748664	22748684	aaaaguaauuguggauuuugc	mml-miR-548n-2-3p	22748706	22748726	aaaaaccacaauuaauuuugc
yes		yes	ENSMMUT00000049101	mml-miR-548n-3	CM002996.3	-	35029776	35029927	acacuuaaacaugguuaaaauggcaaauuuuguguuauauuagguugaugcaaaaguaauuguggauuuugucauuaaaaguaauggcuaaaccgcaauuacuuuugcaccaccuuauuacauauuuuacugcauuuaaagguggaaaaguc	152	mml-miR-548n-3-5p	35029825	35029846	gcaaaaguaauuguggauuuug	mml-miR-548n-3-3p	35029866	35029885	aaccgcaauuacuuuugcac
yes				mml-miR-548n-4	CM002987.3	-	127809180	127809280	aggcaccauuuauuagguugccacaaaaguaauuguggauuuugccauucaaaguaaugacaaaaaccauaauaacuuuugcaccagccuaauacaaagca	101	mml-miR-548n-4-5p	127809204	127809224	aaaaguaauuguggauuuugc	mml-miR-548n-4-3p	127809242	127809264	aaaaccauaauaacuuuugcacc
yes				mml-miR-548o-1	CM002982.3	-	99552990	99553189	uuuggggaguuucucaauuaaaaaguuaauauucuuaauaguuauauuuaauaguaauucaaaucuauuagguuggugcaaaaguaguugugauuuuugucauuacuuuuaauggcaaaaacugcaguuacuuuugcaccaaccuuauacuucauuuugggugaguagauguaauuuaugcuuuuaauggaauuggccca	200	mml-miR-548o-1-5p	99553058	99553078	uagguuggugcaaaaguaguu	mml-miR-548o-1-3p	99553119	99553137	acuuuugcaccaaccuuau
yes				mml-miR-548o-2	CM002987.3	-	67316136	67316236	caauacagauacuagguuggugcaaguguaauugugguuuuugccauuacuuuuauugacaaaacugcaguuacuuuugcaccagacuaauaacuuguauu	101	mml-miR-548o-2-5p	67316159	67316181	aaguguaauugugguuuuugcca	mml-miR-548o-2-3p	67316195	67316215	caaaacugcaguuacuuuugc
yes				mml-miR-548o-3	CM002978.2	+	85004842	85004993	cuuuauccuauccacauuguuugaaggccaagauuaguauuagguuggugcaaaaguaauugcagcauuugccauuacaaguaauggccaaaacugcaguuacuuuugcaauaaccuaaugguuaacccucauaacauuugaagacugcuau	152	mml-miR-548o-3-5p	85004893	85004913	aaaaguaauugcagcauuugc	mml-miR-548o-3-3p	85004930	85004950	caaaacugcaguuacuuuugc
yes				mml-miR-548o-4	CM002997.3	+	54761856	54762005	ccaguuuucaguccuuucaguucaugugcaccuuuuauuauauuagguuggugcaaaaguaauugcaguuuuugcuauuaaaaguaaugaaaaauaauggcaaaaacugcaguuacuuuugcaccaaucuaaauaaucuuuuuguucuua	150	mml-miR-548o-4-5p	54761910	54761929	aaaaguaauugcaguuuuug	mml-miR-548o-4-3p	54761957	54761976	aaaaacugcaguuacuuuug
yes				mml-miR-548o-5	CM002997.3	-	99755350	99755450	uacuugaauuacagguugaugcaaaaguaauugugguuuuggcauuagaauaauggcaaaacugcaguuacuuuugcaccaaccuguaacagcucuuaaga	101	mml-miR-548o-5-5p	99755369	99755390	ugcaaaaguaauugugguuuug	mml-miR-548o-5-3p	99755406	99755426	caaaacugcaguuacuuuugc
yes		yes	ENSMMUT00000049322	mml-miR-548p-1	CM002980.3	+	138022347	138022496	auucucuagccucuuaccauguuuguuuucuccuugucucccuuuguuguuuaaaauauuaggcuagugcaaaaguaaucgugguuuuugugauuacuuucaauggcaaaaacugcaguuacuuuugcaccaaccuaauauuuuuuaacu	150	mml-miR-548p-1-5p	138022416	138022437	caaaaguaaucgugguuuuugu	mml-miR-548p-1-3p	138022454	138022475	aaaaacugcaguuacuuuugca
yes				mml-miR-548p-2	CM002980.3	-	165951280	165951429	uuuuuaaugcuagaacaacuggguaucauacaaaauaauauuagauugaugcaaaaguaauugugguuuuugcaauuucuuucaauggcaaaaacugcaguuacuuuugcaccaaccuuaauuuggaccccuaguucacauacuacaaaa	150	mml-miR-548p-2-5p	165951331	165951351	caaaaguaauugugguuuuug	mml-miR-548p-2-3p	165951369	165951389	aaaaacugcaguuacuuuugc
yes				mml-miR-548p-3	CM002984.2	-	25745016	25745165	caaaaauaauuuaaguagguugaugcaaaaguaauugcgguuuugucauuacuuuuaauggcaaaaacugcaguuacuuuugcaccaacauaauacauuaaacucacuaccacccuauagaaauuuagcucauucacacagacauauuau	150	mml-miR-548p-3-5p	25745040	25745060	gcaaaaguaauugcgguuuug	mml-miR-548p-3-3p	25745078	25745097	aaaaacugcaguuacuuuug
yes				mml-miR-548p-4	CM002984.2	-	44871830	44871978	gaagaacaccuagcacugucugagaucaugaagacauuuguauuagguuggugcaaaaguaauuguuuuuugcauugaaaguaauggcaaaaacugcaguuacuucugcaccaaccuaauauucaccuaaggauucuaguggcccaggg	149	mml-miR-548p-4-5p	44871873	44871893	uagguuggugcaaaaguaauu	mml-miR-548p-4-3p	44871925	44871945	gcaguuacuucugcaccaacc
yes				mml-miR-548p-5	CM002984.2	+	129825239	129825338	gauuugaaucuauuuguguuggugcaaaaguuauugugauuuuugccauuguguauaguggcaaaaacugcaguuacuuuugcaccaaccuaauauauua	100	mml-miR-548p-5-5p	129825265	129825284	aaaguuauugugauuuuugc	mml-miR-548p-5-3p	129825301	129825320	aaaaacugcaguuacuuuug
yes				mml-miR-548p-6	NC_007861.1	-	103403644	103403743	aggaacaugcauuauguuggugcaaaagaaauugcagcuuuugccauuacuuucaaucgcaaaaacugcaguuacuuuugcaccacccuaauaaaaauga	100	mml-miR-548p-6-5p	103403668	103403687	aaagaaauugcagcuuuugc	mml-miR-548p-6-3p	103403704	103403723	aaaaacugcaguuacuuuug
yes				mml-miR-548p-7	CM002983.2	+	106813518	106813617	cugcuucagauuauaaaaauacuagguuggugcagaaguagucgcaguuuuuaccauugaaacuaauggcaaaaacugcaguuacuuuugcaccaaccca	100	mml-miR-548p-7-5p	106813552	106813572	gaaguagucgcaguuuuuacc	mml-miR-548p-7-3p	106813588	106813607	aaaaacugcaguuacuuuug
yes		yes	ENSMMUT00000049919	mml-miR-548p-8	CM002981.2	-	57980693	57980791	guagcauuucuauuagguuggugcaaaagugauugcaguguuugccaauaaaaguaaugacaaaaacugcaguuacuuuuacaccaguuacuuuugcau	99	mml-miR-548p-8-5p	57980718	57980738	aaagugauugcaguguuugcc	mml-miR-548p-8-3p	57980754	57980774	aaaaacugcaguuacuuuuac
yes				mml-miR-548p-9	CM002982.3	+	35287638	35287718	aauaggcuggcacaaaaguaacugugguuuuugccaugacuuucaguagcaaaaacugcaguuacuuuugcaccaaccuaa	81	mml-miR-548p-9-5p	35287651	35287672	aaaaguaacugugguuuuugcc	mml-miR-548p-9-3p	35287688	35287707	aaaaacugcaguuacuuuug
yes				mml-miR-548p-10	CM002985.3	-	53642168	53642317	uauauaauuaauacuuucacauccuuugaugcuuugaugguguacguugguccaaaaguaauugugguuuuugucauuaaaaguaaaggcaaaaacugcaguuacuuuuguaccaaccuguauuuuucucuucucagauucucaguggaa	150	mml-miR-548p-10-5p	53642220	53642240	caaaaguaauugugguuuuug	mml-miR-548p-10-3p	53642260	53642281	aaacugcaguuacuuuuguacc
yes				mml-miR-548p-11	CM002985.3	+	120354188	120354287	gagacgguucuguuaggggugcaaaaggaauugcgguuuuugccauuacuuuucauggcaaaaacugcaguuacuuuugcaccaaccuaauuguuagaca	100	mml-miR-548p-11-5p	120354210	120354229	aaaaggaauugcgguuuuug	mml-miR-548p-11-3p	120354247	120354266	aaaaacugcaguuacuuuug
yes				mml-miR-548p-12	CM002992.3	+	42979697	42979797	auagauagauacucgguuggugcaaaaguaauugagguuuuugccaugaccuguaauugcagcaaaaacugcaguuacuuuugcuccaaccugauagcuag	101	mml-miR-548p-12-5p	42979721	42979740	aaaguaauugagguuuuugc	mml-miR-548p-12-3p	42979760	42979779	aaaaacugcaguuacuuuug
yes				mml-miR-548p-13	CM002979.2	+	78918993	78919092	ggauuugaacuauagguuggugcaaaagcaauugugauuuuugcguugaaagucuuggcaaaaacugcaguuacuuuugcgcuagcccaaugcuuuagag	100	mml-miR-548p-13-5p	78919016	78919035	aaaagcaauugugauuuuug	mml-miR-548p-13-3p	78919052	78919071	aaaaacugcaguuacuuuug
yes				mml-miR-548p-14	CM002978.2	+	82122496	82122645	caaaaaccucugauacaacugaccucucugugugaaaacauucuauuaaguuggugcaaaacuaaucacaguuuuugccauugaaaaucaaggcaaaaacugcaguuacuuuugcaccaacugaauacuuccugacuuuccaugacaaac	150	mml-miR-548p-14-5p	82122554	82122573	aaacuaaucacaguuuuugc	mml-miR-548p-14-3p	82122590	82122609	aaaaacugcaguuacuuuug
yes				mml-miR-548p-15	CM002988.2	+	84972535	84972634	acuggggauuuucauuuauuagguuggugcaaaaguaauugcgguuuuuacaaagaguaauggcaaaaacugcaguuacuuuuguaccaaccuaacaaaa	100	mml-miR-548p-15-5p	84972562	84972583	ugcaaaaguaauugcgguuuuu	mml-miR-548p-15-3p	84972601	84972622	aaacugcaguuacuuuuguacc
yes				mml-miR-548u-1	CM002977.3	-	202929388	202929489	auuuucuucaaauguaucuguuaaguuggugcaaaaauaauugaggucuuuccauuacuuuuaauggcaaagacugcaauuacuuuugcaccaaccuaauac	102	mml-miR-548u-1-5p	202929421	202929440	aaaauaauugaggucuuucc	mml-miR-548u-1-3p	202929456	202929475	aaagacugcaauuacuuuug
yes				mml-miR-548u-2	CM002984.2	+	110243367	110243517	augaaagaaucugcaccacaaaccccuugacaugaguuuaccuauuagguuaacgcaaaaguaauugucauuuucccauuauuuuuaaugacaaagacugcaauuacuuuuggaccaaccuaauacauaacaaacuugcacauguacuccu	151	mml-miR-548u-2-5p	110243424	110243444	aaaguaauugucauuuuccca	mml-miR-548u-2-3p	110243459	110243478	aaagacugcaauuacuuuug
yes		yes	ENSMMUT00000049227	mml-miR-548u-3	CM002983.2	+	58366588	58366689	guugaaaaccaugagacuauuaggauggugcaaaaguaauugugguuuuugucuuuacuuuuaauggcaaagacugcaauuacuuuugcaccaacccaauaa	102	mml-miR-548u-3-5p	58366618	58366639	caaaaguaauugugguuuuugu	mml-miR-548u-3-3p	58366656	58366675	aaagacugcaauuacuuuug
yes				mml-miR-548u-4	CM002991.3	-	63783506	63783607	cucccuaaaauaauauuuaggucggugcaaaaguaauugcgguuuuuuuauuguuuuuaaugacaaagacugcaauuacuuuugcaccaaccuaagaauugg	102	mml-miR-548u-4-5p	63783534	63783552	aaaaguaauugcgguuuuu	mml-miR-548u-4-3p	63783570	63783589	aaagacugcaauuacuuuug
yes				mml-miR-548u-5	CM002992.3	-	16066587	16066688	gcucuuuucuuuauaaauuauuagauuggugcaaaaggaauuacgcuuuugacuuuacaauuaauggcaaagacugcaauuacuuuugcaccaaccuaauac	102	mml-miR-548u-5-5p	16066620	16066639	aaaggaauuacgcuuuugac	mml-miR-548u-5-3p	16066655	16066674	aaagacugcaauuacuuuug
yes				mml-miR-548u-6	CM002989.3	-	79821872	79821973	ggacuuuauuuauuagguuggugcaaaaguaauugagguuuuugccauugaagguaauaucaaagacugcaauuacuuuugcaccaacauaauaaugcacca	102	mml-miR-548u-6-5p	79821897	79821918	aaaguaauugagguuuuugcca	mml-miR-548u-6-3p	79821933	79821952	aaagacugcaauuacuuuug
yes				mml-miR-548u-7	CM002978.2	-	35673511	35673612	cuaggaauauuauuagguuguugcaaaaguuauugcagcuuuugccauuaaaaacaauggcaaagacugcaauuacuuuugcacgaaccuaauagauuuuuu	102	mml-miR-548u-7-5p	35673536	35673555	aaaguuauugcagcuuuugc	mml-miR-548u-7-3p	35673572	35673591	aaagacugcaauuacuuuug
yes				mml-miR-548u-8	CM002978.2	-	42225905	42226056	augagguagaguuuaucagucagaggucuuaguuauuagauugcuacaaaaguaauugcuauuuuugcaauuacuuuuaauggcaaagacugcaauuacuuuugcaccaaccuaauacaaacaacuaugaauucaucuugguuaguuugcca	152	mml-miR-548u-8-5p	42225953	42225972	aaaguaauugcuauuuuugc	mml-miR-548u-8-3p	42225989	42226008	aaagacugcaauuacuuuug
yes				mml-miR-548u-9	CM002978.2	+	55677643	55677744	cagaguaaucugguuacaauaaggaauuguagucuuugccauuacuuucaguggcaaagacugcaauuacuuuugcaccauccauauaagucaggucaugua	102	mml-miR-548u-9-5p	55677665	55677681	ggaauuguagucuuugc	mml-miR-548u-9-3p	55677698	55677717	aaagacugcaauuacuuuug
yes				mml-miR-548u-10	CM002988.2	-	33789042	33789243	aaggugagagagcuuucuggggucucuuauaaaggugcuauuagguuggugcaaaaguaauugugguuuuugccauuacuuuuaauucacacggaagcugggcucaucagcucaucacacauuacuuuuaauggcaaagacugcaauuacuuuugcaccaacguaauaauucuacucauaaaagcucuguccucagaaccua	202	mml-miR-548u-10-5p	33789094	33789114	aaaaguaauugugguuuuugc	mml-miR-548u-10-3p	33789177	33789196	aaagacugcaauuacuuuug
yes				mml-miR-548u-11	CM002988.2	+	106958498	106958600	caagagcauuguauuagguuggugcaaaaguaauugcuauuuuagacauuacuuucaauggcaaaaacugcaauuacuuuugcgccaacuaauacuuuccugg	103	mml-miR-548u-11-5p	106958524	106958545	aaaguaauugcuauuuuagaca	mml-miR-548u-11-3p	106958559	106958579	caaaaacugcaauuacuuuug
yes				mml-miR-548u-12	CM002986.2	-	71716519	71716620	ccauuccacaaugcauuagguuggugcaaaaguaauugugguuuuugccauuaaaacuaauugcaaagacugcaauuacuuuugcacuaaccuauauacaua	102	mml-miR-548u-12-5p	71716546	71716566	aaaaguaauugugguuuuugc	mml-miR-548u-12-3p	71716583	71716602	aaagacugcaauuacuuuug
yes				mml-miR-548u-13	CM002990.2	-	44337210	44337310	caaauaauaaaugccauauagguuggugcaaaauuaauuuuguuuuuugccauugcuuucaauggcaaagacugcaauuacuuuuguaccaaccuaauauu	101	mml-miR-548u-13-5p	44337239	44337259	aaaauuaauuuuguuuuuugc	mml-miR-548u-13-3p	44337276	44337295	aaagacugcaauuacuuuug
yes				mml-miR-548u-14	CM002993.2	+	9601436	9601537	cugagauguauuaaguuggugcaaaaguaauugcgguuuugccauugaaguaauugcaaagacugcaauuacuuuugcaccaaccuaauacuuaccuucuuu	102	mml-miR-548u-14-5p	9601456	9601476	gcaaaaguaauugcgguuuug	mml-miR-548u-14-3p	9601493	9601512	aaagacugcaauuacuuuug
yes				mml-miR-548u-15	CM002997.3	-	7514568	7514718	uuaccuuuacuucucugauauuacuauuuucguucuaauauuagguuggugcaaaagucauugcgguuuuggccaucauuuucaauggcaaagacugcaauuacuuuuguuccacccuaauacaaauugugaugaugaauuuaauagguga	151	mml-miR-548u-15-5p	7514621	7514640	aaagucauugcgguuuuggc	mml-miR-548u-15-3p	7514657	7514676	aaagacugcaauuacuuuug
yes				mml-miR-548w-1	CM002981.2	+	133458845	133458947	aggugaaggaugggguauugccugcaguuuacacuuugcuuagcuucuucccuuuucuucuauuagguuggugcaaaaguaacugugguuuuugccuuuacuu	103	mml-miR-548w-1-5p	133458855	133458883	ugggguauugccugcaguuuacacuuugc	mml-miR-548w-1-3p	133458919	133458940	aaaaguaacugugguuuuugcc
yes				mml-miR-548w-2	CM002986.2	-	22064594	22064796	acuuauaaauaacaugaugacaguauuagcuuggugcaaaaguaacugcgguuuuugccuuugaaaguaaugguauuucuucucaaaguuucaccauuaauuuuaguauacaucgguggaucuugucaguagugguacuacuuucaauggcaaaaacuacaguuacuuuugcaccaacuugaauauuuauuguuaucaguuga	203	mml-miR-548w-2-5p	22064628	22064650	ugcaaaaguaacugcgguuuuug	mml-miR-548w-2-3p	22064746	22064768	aaaacuacaguuacuuuugcacc
	yes	yes	ENSMMUT00000048492	mml-mir-549a	CM002991.3	-	58404316	58404410	agacaugcaacucaagaauauauugagagcucauccauaguugucacugucucagaucaugacaauuauggaugagcucuuaauauaucccaggc	95	mml-mir-549a-5p	58404341	58404361	agagcucauccauaguuguca	mml-mir-549a-3p	NA	NA	NA
yes	yes			mml-mir-549b	CM002991.3	+	58404331	58404387	agagcucauccauaauugucaugaucugagacagugacaacuauggaugagcucuca	57	mml-mir-549b-5p	58404331	58404352	agagcucauccauaauugucau	mml-mir-549b-3p	58404366	58404387	gacaacuauggaugagcucuca
yes	yes	yes	ENSMMUT00000048707	mml-mir-550	CM002984.2	+	78421474	78421566	ugaugcuuugcuggcuggugcagugccugagggaguaagagcccuguuguuguaagauaguguccuacucccucaggcacaucuccagcaagu	93	mml-mir-550-5p	78421495	78421517	agugccugagggaguaagagccc	mml-mir-550-3p	78421537	78421556	ccuacucccucaggcacauc
		yes	ENSMMUT00000066958	mml-mir-550-1	CM002984.2	-	77844071	77844166	ugaugcuuugcuggcuggugcagugccugagggaguaagagcccuguuguuguaagauaguguccuacucccucaacacaucuccagcaaguuccu	96	mml-mir-550-1-5p	77844092	77844114	agugccugagggaguaagagccc	mml-mir-550-1-3p	77844133	77844155	uccuacucccucaacacaucucc
yes	yes	yes	ENSMMUT00000036969	mml-mir-551a	CM002977.3	-	2516526	2516621	ggggacugccgggugacccuggaaauccagaguggguggggccugucugaccauuucuaggcgacccacucuugguuuccaggguugcccuggaaa	96	mml-mir-551a-5p	NA	NA	NA	mml-mir-551a-3p	2516586	2516606	gcgacccacucuugguuucca
	yes	yes	ENSMMUT00000036978	mml-mir-551b	CM002980.3	-	125356381	125356475	agaugugcucuccuggcccaugaaaucaagcgugggugagaccuggugcagaacaggaaggcgacccauacuugguuucagaggcugcgagaaua	95	mml-mir-551b-5p	125356402	125356421	gaaaucaagcgugggugaga	mml-mir-551b-3p	125356441	125356461	gcgacccauacuugguuucag
	yes	yes	ENSMMUT00000048685	mml-mir-552	CM002977.3	-	33814719	33814813	accauucaaauauaccacaguuuguuugaccauuaaccuguuuguugaagaugccuuucaacgggugacugguuagacaaacugugguauauuca	95	mml-mir-552-5p	NA	NA	NA	mml-mir-552-3p	33814778	33814798	aacgggugacugguuagacaa
	yes			mml-mir-553	CM002977.3	+	101149814	101149881	cuucaauuuuauuugaaaaaggugagguuuuguuuugucugagaaaaucucacuguuuuagacugagg	68	mml-mir-553-5p	101149829	101149849	aaaaaggugagguuuuguuuu	mml-mir-553-3p	NA	NA	NA
	yes	yes	ENSMMUT00000036920	mml-mir-554	CM002977.3	+	126057856	126057951	accugaguaaccuuugcuaguccugacucagccaguacugaucuuacacuggcagugggucaggguucauauuuuggcaucucucucugggcaucu	96	mml-mir-554-5p	126057871	126057891	gcuaguccugacucagccagu	mml-mir-554-3p	NA	NA	NA
	yes			mml-mir-556	CM002977.3	+	137127412	137127493	gauaguaaugagaaagaugaacucauuguaauaugagcuucauuuaugcauuucauauuacaauuagcugaucuuuuuuuuu	82	mml-mir-556-5p	137127427	137127448	gaugaacucauuguaauaugag	mml-mir-556-3p	137127466	137127487	auauuacaauuagcugaucuuu
	yes			mml-mir-557	CM002977.3	-	199328583	199328680	agaaugggcaaaugaauaguaaauuuggaggccuggggcccucccugcugcuggacaagugucugcaugggugagccuuaucuuugaaaggaggugga	98	mml-mir-557-5p	NA	NA	NA	mml-mir-557-3p	199328643	199328665	gucugcaugggugagccuuaucu
	yes	yes	ENSMMUT00000048939	mml-mir-558	CM002978.2	+	33019080	33019173	guguguguguguguuuguguuuauuuuggcauaguagcucuagacucuauuauaguuuccugagcugcuguaccaaaauaccacaaacugccug	94	mml-mir-558-5p	NA	NA	NA	mml-mir-558-3p	33019140	33019158	ugagcugcuguaccaaaau
	yes	yes	ENSMMUT00000037000	mml-mir-562	CM002979.2	+	114655660	114655754	agugaaauugcugggucauauggucagucuacuuucagaguaauugugaaaguauuuuucaaaguagcuguaccauuugcauucccuguggcaau	95	mml-mir-562-5p	NA	NA	NA	mml-mir-562-3p	114655720	114655739	aaaguagcuguaccauuugc
		yes	ENSMMUT00000038142	mml-miR-562-1	CM002980.3	-	187914110	187914198	aauggaauugcugggccauaugguaacgguuuaaccuguugagaaacugccaaacuguuuuucaaaguggcuguaccauuuacauuccc	89	mml-miR-562-1-5p	NA	NA	NA	mml-miR-562-1-3p	187914173	187914192	aaaguggcuguaccauuuac
	yes			mml-mir-563	CM002980.3	+	172505709	172505787	agcaaagaaguguguugcccuccaggaaauguguguugcucugauguaauuaggcugacauacauuucccugguagcca	79	mml-mir-563-5p	NA	NA	NA	mml-mir-563-3p	172505760	172505778	aggcugacauacauuuccc
	yes	yes	ENSMMUT00000036948	mml-mir-567	CM002980.3	+	33180337	33180430	ggauucuuacaggacacuauguucuuccaggacagaacauucuuugcuauuuuguacuggaagaacaugcaaaacuuuaaaaaaaguuauugcu	94	mml-mir-567-5p	33180352	33180374	acuauguucuuccaggacagaac	mml-mir-567-3p	NA	NA	NA
	yes			mml-mir-568	CM002980.3	-	35338809	35338902	auauacacuauauuauguauaaauguauacacacuuccuauauguauccacauauauauaguguauauauuauacauguauagguguguauaug	94	mml-mir-568-5p	35338823	35338842	auguauaaauguauacacac	mml-mir-568-3p	NA	NA	NA
	yes	yes	ENSMMUT00000036854	mml-mir-569	CM002980.3	+	122725856	122725951	gguauuguuagauuaauuuugugggacauuaacaacagcaucagcagcaacaucagcuuuaguuaaugaauccuggaaaguuaagugacuuuauuu	96	mml-mir-569-5p	NA	NA	NA	mml-mir-569-3p	122725916	122725936	aguuaaugaauccuggaaagu
yes				mml-miR-570	CM002980.3	-	78724632	78724767	guagcuacugaaauuauuagguuggugcaaagguaauugugguuugugccaucacucucaauagcaaaaacugcaauaaccuuugcaccaaccuaauaguuccacuagcagauacuuuuaaaaccugauacuggaa	136	mml-miR-570-5p	78724661	78724682	aagguaauugugguuugugcca	mml-miR-570-3p	78724696	78724717	caaaaacugcaauaaccuuugc
	yes			mml-mir-570	CM002982.3	-	4526862	4526941	uauuagguuggugcaaacguaauugcaguuuuugccauuacuuuuaaaggcaaaaguagcaauuaccuuugcaccaaccu	80	mml-mir-570-5p	NA	NA	NA	mml-mir-570-3p	4526912	4526933	caaaaguagcaauuaccuuugc
	yes			mml-mir-571	CM002981.2	-	431340	431449	ggaacugcuucauaauccucaguaaggccaaccuccaugcaccauuuucuugucuguagccaugucugugggcuguggaguuggccaccugggugagggccugcuuuuuc	110	mml-mir-571-5p	NA	NA	NA	mml-mir-571-3p	431417	431436	gaguuggccaccugggugag
		yes	ENSMMUT00000072159	mml-mir-571-1	CM002981.2	+	379078	379173	cuucaguaagaacaagcucggugcgccauuuccuugucuguagccaugucuaugggccuuugaguuggccaccugggugaggacuuccuuuuucua	96	mml-mir-571-1-5p	379095	379114	ucggugcgccauuuccuugu	mml-mir-571-1-3p	379139	379158	gaguuggccaccugggugag
	yes	yes	ENSMMUT00000036979	mml-mir-572	CM002993.2	-	2295787	2295881	gucgaggccguggcccggaagugaucggggccgccgcggacggaagggcgccucugcuucguccgcucggcgguggcccagccaggcccgcggga	95	mml-mir-572-5p	NA	NA	NA	mml-mir-572-3p	2295847	2295866	guccgcucggcgguggccca
	yes			mml-mir-573	CM002981.2	-	23908055	23908153	uuuagaggugucucccugaagugaugcauaaccgaucaggaucuacucaugucaacuuugguaaaguuauguugcuugucagggugaggagagguuuug	99	mml-mir-573-5p	23908070	23908093	cugaagugaugcauaaccgaucag	mml-mir-573-3p	NA	NA	NA
	yes	yes	ENSMMUT00000053211	mml-mir-574	CM002981.2	+	38503739	38503796	ugagugugugugugugagugugugucgcuccggguccacgcucaugcacacacccaca	58	mml-mir-574-5p	NA	NA	NA	mml-mir-574-3p	38503775	38503796	cacgcucaugcacacacccaca
yes	yes	yes	ENSMMUT00000048877	mml-mir-576	CM002981.2	+	108411182	108411276	uacaauccagugaggauucuaauuucuccacaucuuugguaauaaguuuuggcaaagauguggaaaaauuggaauccucauuggauugguuauaa	95	mml-mir-576-5p	108411197	108411218	auucuaauuucuccacaucuuu	mml-mir-576-3p	108411236	108411257	aagauguggaaaaauuggaauc
yes	yes	yes	ENSMMUT00000036857	mml-mir-577	CM002981.2	+	113761487	113761582	ugggggaaugaagaguagauaaaauauugguaccugaugagugugaggccagguuucaauacuuuaucugcucuucauuuucccauaucuacuuac	96	mml-mir-577-5p	113761502	113761522	uagauaaaauauugguaccug	mml-mir-577-3p	113761538	113761559	gguuucaauacuuuaucugcuc
yes	yes	yes	ENSMMUT00000048895	mml-mir-578	CM002981.2	+	165667918	165668012	gauaaauauauagacaaaauacaauccuggacuauaagaagcuccuauagcuccuguagcuucuugugcucugggauuguauuuuguuuauauau	95	mml-mir-578-5p	NA	NA	NA	mml-mir-578-3p	165667977	165667997	cuucuugugcucugggauugu
yes	yes	yes	ENSMMUT00000048529	mml-mir-579	CM002982.3	-	33057685	33057782	cauauuagguuaaugcaaaaguaaucgcgguuugugccaaauggcgauuugaauuaauaaauucauuugguacaaaccgcgauuacuuuugcaucagc	98	mml-mir-579-5p	NA	NA	NA	mml-mir-579-3p	33057746	33057768	uucauuugguacaaaccgcgauu
yes	yes	yes	ENSMMUT00000048925	mml-mir-580	CM002982.3	-	36503638	36503734	auaaaauuuccaguuggaaccuaaugauucaucagacucagauauuuaaguuaacaguauuugagucugaugaaucauuagguuccagucagaaauu	97	mml-mir-580-5p	NA	NA	NA	mml-mir-580-3p	36503698	36503719	uugagucugaugaaucauuagg
yes	yes	yes	ENSMMUT00000049022	mml-mir-581	CM002982.3	-	54874159	54874254	guucugugaacguauucuuguguucuguagaucagugcuuuuagaaaauuugugugaucuagagaacacaaagaauaccuacacagaaccaucugc	96	mml-mir-581-5p	54874174	54874194	ucuuguguucuguagaucagu	mml-mir-581-3p	NA	NA	NA
yes	yes	yes	ENSMMUT00000048866	mml-mir-582	CM002982.3	-	49365890	49365987	aucugugcucuuugauuacaguuguucaaccaguuacuaaucuaccuaauuguaacugguugaacaacugaacccaaagggugcaaaguagaaacauu	98	mml-mir-582-5p	49365905	49365927	uuacaguuguucaaccaguuacu	mml-mir-582-3p	49365942	49365963	uaacugguugaacaacugaacc
	yes	yes	ENSMMUT00000048592	mml-mir-583	CM002982.3	+	93058756	93058830	aacucgcacauuuaccaaagaggaaggucccaguacugcagggaucuuagcaguacugggaccuaccucuuuggu	75	mml-mir-583-5p	93058771	93058791	caaagaggaaggucccaguac	mml-mir-583-3p	NA	NA	NA
yes	yes	yes	ENSMMUT00000036980	mml-mir-584	CM002982.3	-	147178502	147178598	uagggugaccagccauuaugguuugccugggacugaggaauuugcugggauaugucaguuccaggccaaccaggcugguugguuucccugaagcaac	97	mml-mir-584-5p	147178517	147178538	uuaugguuugccugggacugag	mml-mir-584-3p	147178558	147178578	aguuccaggccaaccaggcug
		yes	ENSMMUT00000038152	mml-mir-584-1	CM002981.2	-	101400030	101400121	aagaugaacuaccauccugguuugccugggacugagggguuuucugggacacaggacuuuuggagccaaaaccuagauuaguuggucacccu	92	mml-mir-584-1-5p	101400044	101400065	uccugguuugccugggacugag	mml-mir-584-1-3p	101400090	101400111	uggagccaaaaccuagauuagu
yes	yes			mml-mir-586	CM002983.2	-	46307347	46307445	augggguaaaaccauuaugcauauuguauuuuuaggucccaauacguguggacccuaaaaaugcaaugcauaaugguuuuauacucuuuaucuucuuau	99	mml-mir-586-5p	46307362	46307385	uaugcauauuguauuuuuaggucc	mml-mir-586-3p	NA	NA	NA
	yes	yes	ENSMMUT00000048639	mml-mir-587	CM002983.2	-	103359582	103359671	cuccuaggcacccucuuuccacaggugaugaguuacagggcccagggaaugugucugcaccugugacucaucacugguggaagcccauac	90	mml-mir-587-5p	103359597	103359617	uuuccacaggugaugaguuac	mml-mir-587-3p	NA	NA	NA
yes	yes	yes	ENSMMUT00000049082	mml-mir-589	CM002984.2	+	39544668	39544766	uccagccugugcccagcagccccugagaaccacgucugcucugagcuggguacugccuguucagaacagacgcugcuucccagacgcugccagcuggcc	99	mml-mir-589-5p	39544691	39544712	ugagaaccacgucugcucugag	mml-mir-589-3p	NA	NA	NA
yes	yes	yes	ENSMMUT00000036908	mml-mir-590	CM002984.2	-	43211711	43211807	uagccagucagaaaugagcuuauucauaaaagugcaguaugguggagucagucuguaauuuuauguauaagcuggucucuaacugaaacgugcagca	97	mml-mir-590-5p	43211726	43211747	gagcuuauucauaaaagugcag	mml-mir-590-3p	43211766	43211786	uaauuuuauguauaagcuggu
yes	yes	yes	ENSMMUT00000036982	mml-mir-592	CM002984.2	-	153244973	153245069	uauuaugccaugacauugugucaauaugcgaugauguguugugauggcacagcgucaucacguggugacgcaacaucaugacguaagacgucacaac	97	mml-mir-592-5p	153244988	153245009	uugugucaauaugcgaugaugu	mml-mir-592-3p	153245027	153245047	ucaucacguggugacgcaaca
	yes	yes	ENSMMUT00000036922	mml-mir-593	CM002984.2	+	154326455	154326554	cccccagagugugucaggcaucagccaggcaucgcucagccccuuucccucugggggagcaaggaguggugcuggguuugucucugcugggguuucuccu	100	mml-mir-593-5p	NA	NA	NA	mml-mir-593-3p	154326533	154326551	ugucucugcugggguuucu
	yes	yes	ENSMMUT00000038145	mml-mir-595	CM002984.2	-	184946902	184946981	ccugcaugcguuuaacaccagcacacucaguauagucuuguaaggagcaggcugaagugugcuguggugugucuggagga	80	mml-mir-595-5p	NA	NA	NA	mml-mir-595-3p	184946955	184946975	gaagugugcuguggugugucu
	yes	yes	ENSMMUT00000036915	mml-mir-597	CM002985.3	-	10113727	10113823	uacuuacucuacaugugugucacuugacgaccacugugaagagaguaaaauguacagugguucucuuggggcucaagcguaacguagagugcugguc	97	mml-mir-597-5p	10113742	10113763	ugugucacuugacgaccacugu	mml-mir-597-3p	NA	NA	NA
yes	yes	yes	ENSMMUT00000036921	mml-mir-598	CM002985.3	+	8706042	8706138	gcuugaugaugcugcugaugcuggcggugaucccgauggugugagcuggaaauggggugcuacgucaucguugucaucgucaucaucaucauccgag	97	mml-mir-598-5p	8706065	8706087	gcggugaucccgauggugugagc	mml-mir-598-3p	8706102	8706123	uacgucaucguugucaucguca
yes	yes	yes	ENSMMUT00000036966	mml-mir-599	CM002985.3	-	98198566	98198660	aaagacaugcuguccacaguguguuugauaagcugacaugggacagggauucuuuucacuguugugucaguuuaucaaacccauacuuggaugac	95	mml-mir-599-5p	98198589	98198610	uuugauaagcugacaugggaca	mml-mir-599-3p	98198626	98198645	guugugucaguuuaucaaac
	yes			mml-mir-600	CM002986.2	+	15981561	15981654	aagucacuuacugugucuccagcuucacaggaaggcucuugucugucaggcaguggaguuacagacaagagccuugcucaggccagcccugccc	94	mml-mir-600-5p	NA	NA	NA	mml-mir-600-3p	15981617	15981639	aguuacagacaagagccuugcuc
	yes	yes	ENSMMUT00000036847	mml-mir-601	CM002986.2	+	15650806	15650884	ugcaugaguucaucuuggucuaggauuguuggaggagucagaaaaauuaccccagggauccugaagucauuggggugga	79	mml-mir-601-5p	15650821	15650842	uggucuaggauuguuggaggag	mml-mir-601-3p	NA	NA	NA
	yes	yes	ENSMMUT00000048780	mml-mir-603	CM002987.3	+	24449100	24449193	gauugaugcuguugguuugguccaaaaguaauuguggugcuugccguuuauaaguaauggcacacacugcaauuacuuuuucucuaacuuaaua	94	mml-mir-603-5p	NA	NA	NA	mml-mir-603-3p	24449160	24449181	cacacacugcaauuacuuuuuc
		yes	ENSMMUT00000049119	mml-miR-603-1	CM002981.2	+	134536247	134536330	auauuagguuggcacaaaaguaauugcaguguugccauugaaaguaaugguaaaaacugcaauuacuuuaacgucaaccuaaua	84	mml-miR-603-1-5p	134536258	134536277	gcacaaaaguaauugcagug	mml-miR-603-1-3p	134536304	134536323	ugcaauuacuuuaacgucaa
yes				mml-miR-603a	CM002978.2	-	82162331	82162479	uguuauuagaaaggaucucaacauuaagcuauagguuggcgcaaagguaauugcagcuuuuucccauuaaaaguaguggcaaacacugcaauuacuuuugcaccaacugauauucauaguuaaauuuuuggggagucaaaaguuauaau	149	mml-miR-603a-5p	82162374	82162395	aagguaauugcagcuuuuuccc	mml-miR-603a-3p	82162411	82162430	aaacacugcaauuacuuuug
yes				mml-miR-603b	CM002981.2	-	102267409	102267507	uguaggauuuauauuagguuggugcaaaaguaauugcagucuuugcauagcuuaaaaaaaauggcaaacacugcaauuacuuuugcacuaaccuaauac	99	mml-miR-603b-5p	102267435	102267454	aaaguaauugcagucuuugc	mml-miR-603b-3p	102267474	102267493	aaacacugcaauuacuuuug
yes				mml-miR-603c	CM002985.3	+	20603178	20603326	ucaaaacuauauugauuagugauauuugugaguauuuauuuggcuggugcaaaaguaaucaugguuuuugcuauugaaaguaauggcaaacacugcaauuacuuuugcaccaacgcaauauuucuucccaaccucaaagucaacuuaga	149	mml-miR-603c-5p	20603229	20603248	aaaguaaucaugguuuuugc	mml-miR-603c-3p	20603265	20603284	aaacacugcaauuacuuuug
	yes			mml-mir-604	CM002987.3	-	29671861	29671954	agagcaucgugcuugaccuuccacgcucccguguccacuagcaggcagguuuucugacacgggcugcgggauucaggacagcgcaucacggaga	94	mml-mir-604-5p	NA	NA	NA	mml-mir-604-3p	29671922	29671939	ggcugcgggauucaggac
yes	yes	yes	ENSMMUT00000048941	mml-mir-605	CM002987.3	-	81534757	81534838	cccuagcuugguucuaaaucccacggugccuucuccuugggaaaaacagagaaggcacugugggauuuagaaccaaguuagg	82	mml-mir-605-5p	81534771	81534793	uaaaucccacggugccuucuccu	mml-mir-605-3p	NA	NA	NA
yes	yes			mml-mir-607	CM002987.3	+	92319446	92319540	ucgcccaaagucacacagguuauagaucuggauuggaacccagguagccagacugccuggguuugaauccagaucuguaaccugugugacuuugg	95	mml-mir-607-5p	92319464	92319484	guuauagaucuggauuggaac	mml-mir-607-3p	NA	NA	NA
	yes	yes	ENSMMUT00000049018	mml-mir-609	CM002987.3	-	100043792	100043885	ugcucugcuuuuccuaggguguugcucucaucucuggucuauaaugggguaaauguagagaugagggcaacagccuaggaacagcagaggaacc	94	mml-mir-609-5p	100043807	100043826	aggguguugcucucaucucu	mml-mir-609-3p	NA	NA	NA
	yes	yes	ENSMMUT00000037003	mml-mir-611	CM002988.2	+	12498027	12498093	aaaauggugagaggguuaaggggaguucccgacggagaugcgaggaccccucggggucugacccaca	67	mml-mir-611-5p	NA	NA	NA	mml-mir-611-3p	12498066	12498088	gcgaggaccccucggggucugac
yes	yes			mml-mir-612	CM002988.2	-	8970064	8970163	ucucaucuggaccccacuggggagggcuucugagcuccucagcacuggcaggaggggcuccaggggcccucccuccauggcagccaggacaggacucuca	100	mml-mir-612-5p	8970080	8970102	cuggggagggcuucugagcuccu	mml-mir-612-3p	NA	NA	NA
yes	yes	yes	ENSMMUT00000038132	mml-mir-615	CM002989.3	+	52703043	52703138	cucgggaggggcggaagggggguccccggugcucggaucucgagggugcuuauuguucgguccgagccugggucucccucuuccccccaacccccc	96	mml-mir-615-5p	52703060	52703081	ggggguccccggugcucggauc	mml-mir-615-3p	52703103	52703124	uccgagccugggucucccucuu
yes				mml-miR-616	CM002989.3	+	56312051	56312200	uucaccauacagcagccugagugaaccuuuuaaaacaggucauuccucugcucaaaacucuccagugacuuccuaugucaugucagggaagucauuggaggguuuugagaggaggaauuaccuaagguaauuccugaccaccugauguaa	150	mml-miR-616-5p	56312100	56312121	gcucaaaacucuccagugacuu	mml-miR-616-3p	56312141	56312162	gucauuggaggguuuugagagg
	yes			mml-mir-616	CM002989.3	-	56312078	56312175	uuagguaauuccuccucucaaaacccuccaaugacuucccugacaugacauaggaagucacuggagaguuuugagcagaggaaugaccuguuuuaaaa	98	mml-mir-616-5p	56312098	56312113	aaacccuccaaugacu	mml-mir-616-3p	NA	NA	NA
	yes	yes	ENSMMUT00000038250	mml-mir-618	CM002989.3	-	79828537	79828636	ucuuguucacaaccaaacucuacuuguccuucugagugugauuacgcccauggaguagcucaggaggcaaacaggguuacccuguggauaggucugaaaa	100	mml-mir-618-5p	79828551	79828573	aaacucuacuuguccuucugagu	mml-mir-618-3p	NA	NA	NA
	yes	yes	ENSMMUT00000049279	mml-mir-619	CM002989.3	-	108752170	108752268	cgcccaccucagccucccaaaaugcugggauuacaggcaugagccaccgcagucgaccaugaucuggacauguuugugccugggauugucaguuugcag	99	mml-mir-619-5p	NA	NA	NA	mml-mir-619-3p	108752230	108752249	gaucuggacauguuugugcc
yes				mml-miR-619a	NW_001134456.1	-	4536	4687	caaagggcugggauuacaggcaugagccacugcacccauccuagccguauauuuaauucugucacauuugagcagcacagauggauaguuuacaagcuuggucuuuagguaagaguguuucaggugccauuuaauuuuaccacuuuuuuuuu	152	mml-miR-619a-5p	4545	4565	gggauuacaggcaugagccac	mml-miR-619a-3p	4649	4674	aguguuucaggugccauuuaauuuua
yes				mml-miR-619ac	JSUE03105947.1	-	262	413	gcccgccaccacacccggcuaauauuuguauuuuuaguacagacgggguuucaccauguuggucagguuggucuugaacuccugaccucgugauccacugccucggccuccuaaagugcugggauuacaggcaugagccacugugccuggcc	152	mml-miR-619ac-5p	280	298	cuaauauuuguauuuuuag	mml-miR-619ac-3p	382	402	gggauuacaggcaugagccac
yes				mml-miR-619ad	CM002996.3	+	18252913	18253014	gugcugggauuacaggcaugagccaccgcgcccagccaagacagggucuuucucugucacccaggcuggaguaugcaguggugcagucuuaacucacugcag	102	mml-miR-619ad-5p	18252918	18252938	gggauuacaggcaugagccac	mml-miR-619ad-3p	18252992	18253011	ggugcagucuuaacucacug
yes				mml-miR-619ae	CM002995.2	-	39943994	39944195	gcuggucuugaacugcuaaccucaugauccguccaccucugcuucccaacgugcugggauuacaggcaugagccacugugccuggccuaaucauggccuuuaaaacauggagcagcuggguacaguggcucacgccuauaauuccagcacuuugggaggcugaggcggguggaucaccugaggucgggaguuccagaccagc	202	mml-miR-619ae-5p	39944049	39944069	gggauuacaggcaugagccac	mml-miR-619ae-3p	39944120	39944140	ggcucacgccuauaauuccag
yes				mml-miR-619ah	CM002996.3	-	868550	868701	gugcugggauuacaggcaugagccacuacaucuaaugggauuuuugcuugaaucuguccucacuguauuccgugaccuccccauuugauacuacaggucuccccuucuccccaugucacuuagccucucugcucugucuuauuccauagcuu	152	mml-miR-619ah-5p	868555	868575	gggauuacaggcaugagccac	mml-miR-619ah-3p	868677	868698	ucugcucugucuuauuccauag
yes				mml-miR-619aj	CM002991.3	+	139506715	139506869	ggauuacaggcaugugccaccaugccuggcuaauuuuuguauuuuuaguagagaugggguuucaccauguuggucaggcuggucucgaacuccugaccucgugaucugccugccuuggccucccaaagugcugggauuacaggcgugagccaccg	155	mml-miR-619aj-5p	139506750	139506768	uuuguauuuuuaguagaga	mml-miR-619aj-3p	139506832	139506853	ucggccucccaaagugcuggga
yes				mml-miR-619am	CM002986.2	-	108294412	108294594	cccgaguagcugggacuauaggugugugccaugauacccggcuaauuuuuucaauuuuugguagagaugggggucucaccauguugcccagguuggucuugaacuccugggcucaagcaauccuccugccucagccuuccaaagugcugggauuacaggcaugagccacagcaccuggccaca	183	mml-miR-619am-5p	108294434	108294452	ugugugccaugauacccgg	mml-miR-619am-3p	108294560	108294580	gggauuacaggcaugagccac
yes				mml-miR-619an	CM002984.2	+	41776893	41776989	guuagccaggauggucucgaucuccugaccuugugaucugcccgccucggccucccgaagugcugggauuacaggcaugagccaccgcgccuggccg	97	mml-miR-619an-5p	41776916	41776938	ccugaccuugugaucugcccgcc	mml-miR-619an-3p	41776957	41776977	gggauuacaggcaugagccac
yes				mml-miR-619aq	CM002993.2	-	74644998	74645199	aggcuggucuugaacugagcucaagugauccuucugccuuggccucccaaagugcugggauuacaggcaugagccacugugcccagccugacccucaucuuuuaagaaaauugggccgggcgcgguggcucacgccuguaaucccagcacuuugggaggccaaggcagaaggaucacuugagcucaguucaagaccagccug	202	mml-miR-619aq-5p	74645054	74645074	gggauuacaggcaugagccac	mml-miR-619aq-3p	74645124	74645144	ggcucacgccuguaaucccag
yes				mml-miR-619g	JSUE03182528.1	-	12575	12724	auguuuuguauuuuuaguagagggguuucaccauguuggccaggcuggucuugagcuccugaccucugaugauccaccugccuuggccuaccaaagugcuugggauuacaggcaugagccacugugccuggcaauugggaggcuuuugca	150	mml-miR-619g-5p	12627	12655	gagcuccugaccucugaugauccaccugc	mml-miR-619g-3p	12676	12696	gggauuacaggcaugagccac
yes				mml-miR-619h	CM002981.2	+	3923116	3923228	aaagugcugggauuacagguaugagccaccaugcccaacccuaauacagcauuguuuaaaaaguuauauuuucaccgggcgcgguggcucacgccuguaaucccagcacuuug	113	mml-miR-619h-5p	3923209	3923233	ugcugggauuacaggcaugagccac	mml-miR-619h-3p	3923203	3923225	cucacgccuguaaucccagcacu
yes				mml-miR-619i	CM002981.2	-	2769007	2769208	ggcuggacucaaacuccugaucuccggugauccgccugccucggccucccaaagugcugggauuacaggcaugagccaccacacccggcccacaaaaugaguuuuuaaaaaaauaguuuaggccagggcuuacaccuguaauccuggcacuuugggaggccagacaagcagacucccugagcucaggaguuugagaccagcc	202	mml-miR-619i-5p	2769056	2769079	caaagugcugggauuacaggcaug	mml-miR-619i-3p	2769138	2769161	acaccuguaauccuggcacuuugg
yes				mml-miR-619l	CM002990.2	+	81799885	81799986	uggucauacuggucucgaacuccugaccucgugauccaucugccucagccucccaaagugcugggauuacaggcaugagccacugcgcccgggcuugacuac	102	mml-miR-619l-5p	81799900	81799921	cgaacuccugaccucgugaucc	mml-miR-619l-3p	81799950	81799969	auuacaggcaugagccacug
yes				mml-miR-619m	KQ743761.1	+	4812	4959	ccaccauaccuggcuaauuuuuguauuuuuuaguagagaugggguuucaacauguuggucaggccagccucgaacuccugaccucagguguuccacucgccuuggccuccuaaagugcugggauuacaggcaugagccauggcaccca	148	mml-miR-619m-5p	4826	4844	uaauuuuuguauuuuuuag	mml-miR-619m-3p	4931	4948	gggauuacaggcaugagc
yes				mml-miR-619n	JSUE03264829.1	+	157	258	ucugcaccccucggccuccaaagugcugggauuacaggcaugagccacugugccuggccauugccuggugauuuuuuauugacugguagacauugugcuuuu	102	mml-miR-619n-5p	184	204	gggauuacaggcaugagccac	mml-miR-619n-3p	213	234	gccauugccuggugauuuuuua
yes				mml-miR-619o	JSUE03164600.1	-	2942	3043	uguuagccaggauggugucgaucuccugaccccgugaucugcccaccuugaccucccaaagugcugggauuacagacaugagccaccccaccaggcuuauag	102	mml-miR-619o-5p	2964	2987	cuccugacccugugaucugcccgc	mml-miR-619o-3p	3007	3027	gggauuacaggcaugagccac
yes				mml-miR-619q	KQ738721.1	-	10311	10462	cgcccccacacccggcuaguuuuuguauuuuuaguagagacaggguuucaccauguuggucaggccggucuugaacuccugaccucaggugauccaucugccuuggccucccaaagugcugggauuacaggcaugagccacugcgcccggcc	152	mml-miR-619q-5p	10332	10350	uuuguauuuuuaguagaga	mml-miR-619q-3p	10426	10445	gugcugggauuacaggcaug
yes				mml-miR-619x	CM002991.3	+	21807024	21807125	ucaggcuggucucaaacuccugaccucaagugauccgcucgccuuggccucccaagugcugggauuacaggcaugagccaauguguucagucagaauaucca	102	mml-miR-619x-5p	21807042	21807065	ccugaccucaagugauccgcucgc	mml-miR-619x-3p	21807084	21807101	gggauuacaggcaugagc
yes				mml-miR-619z	CM002983.2	+	119725172	119725344	aagcaauccgccugccucagccucccaaagugcugggauuacaggcaugagccacugugcccagacucuuuucaucauuucuuaauauuuuauauggaaaacgacaggcuggaaucagugacucaugccuauaaucccagcacuuugggaggcugaggcaggcagauugcuua	173	mml-miR-619z-5p	119725203	119725224	gcugggauuacaggcaugagcc	mml-miR-619z-3p	119725294	119725314	ucaugccuauaaucccagcac
yes		yes	ENSMMUT00000036997	mml-miR-621	CM002990.2	+	20130511	20130661	uucucuccccaagaacuuccccucuuggacuuuagauugaggaaggggcugagugguaggcagugccgcugugcuuugaugaagacccacguggcuggcaacagcucuuaccuuuugucucuggguccuggccuggguaggauuccugggu	151	mml-miR-621-5p	20130545	20130566	gauugaggaaggggcugagugg	mml-miR-621-3p	20130612	20130633	cagcucuuaccuuuugucucug
	yes	yes	ENSMMUT00000038198	mml-mir-622	CM002980.3	-	188847485	188847575	agaggagcuggacaaguacuggucucagcagacugaggagagcaccgcaguggucaccacacagucugcugagguuggagcugcugagaug	91	mml-mir-622-5p	NA	NA	NA	mml-mir-622-3p	188847545	188847565	acagucugcugagguuggagc
		yes	ENSMMUT00000038193	mml-mir-622-1	CM002980.3	+	160437553	160437648	agaggggcuagacaaauacuggucucagcagaucgaggagggcaccacaguagucaccacgcagucugcugagguuagagcugcugagaugacgcu	96	mml-mir-622-1-5p	160437569	160437589	uacuggucucagcagaucgag	mml-mir-622-1-3p	160437613	160437633	gcagucugcugagguuagagc
		yes	ENSMMUT00000038196	mml-mir-622-2	CM002990.2	-	18012278	18012373	agaggagcuagacaaguacuggucucagcagauugaggagagcaccacaguggucaccacacaguccgccgagguuggagcugcugagacgacgcu	96	mml-mir-622-2-5p	18012294	18012314	uacuggucucagcagauugag	mml-mir-622-2-3p	18012338	18012358	acaguccgccgagguuggagc
		yes	ENSMMUT00000038197	mml-mir-622-3	CM002984.2	+	151558618	151558713	agaggagcuagacaaguacuggucucagcagauugaggagagcaccacaguggucaccacacagucugccgagguuggagcugcugagacgaugcu	96	mml-mir-622-3-5p	151558636	151558656	cuggucucagcagauugagga	mml-mir-622-3-3p	151558678	151558698	acagucugccgagguuggagc
		yes	ENSMMUT00000048365	mml-mir-622-4	CM002987.3	-	129868074	129868166	agaggagcuggacaaguacuguucucagcagauugaggagaggaccacaguggucaccacaguccgccgagguuggagcugcugagacgacgc	93	mml-mir-622-4-5p	129868106	129868126	uugaggagaggaccacagugg	mml-mir-622-4-3p	129868132	129868152	acaguccgccgagguuggagc
		yes	ENSMMUT00000048366	mml-mir-622-5	CM002978.2	-	32314065	32314160	agaggagcuggacauguacuggucucagcagauugaggagagcaccacaguggucaccacacagucuaccgagguuggagcugcuaagacgaugcu	96	mml-mir-622-5-5p	32314083	32314103	cuggucucagcagauugagga	mml-mir-622-5-3p	32314125	32314145	acagucuaccgagguuggagc
		yes	ENSMMUT00000048378	mml-mir-622-6	CM002981.2	-	170463020	170463115	agaggagcuagacaaguacuggucucagcagacugaggagagcaccacaguggucaccacacaguccgccgagguuggagcugcugagacgacgcu	96	mml-mir-622-6-5p	170463038	170463058	cuggucucagcagacugagga	mml-mir-622-6-3p	170463080	170463100	acaguccgccgagguuggagc
		yes	ENSMMUT00000048388	mml-mir-622-7	CM002979.2	-	120797246	120797341	agagaagcuagacaaguacuggucucagcagauugaggagagcaccacaguggucaccacacaguccgccgagguuggagcugcugagacgacgcu	96	mml-mir-622-7-5p	120797262	120797282	uacuggucucagcagauugag	mml-mir-622-7-3p	120797306	120797326	acaguccgccgagguuggagc
		yes	ENSMMUT00000051936	mml-mir-622-8	CM002989.3	+	51624667	51624762	agaggagcuagacaaguacuggucucagcagauugaggagagcaccacaguggucaccacacagucugccgagguuggagcugcugagacgaugcu	96	mml-mir-622-8-5p	51624685	51624705	cuggucucagcagauugagga	mml-mir-622-8-3p	51624727	51624747	acagucugccgagguuggagc
		yes	ENSMMUT00000056029	mml-mir-622-9	CM002994.2	-	22260667	22260762	agaggagcugggcaaguacugaucucagcagauugaggagagcacugcaguggucaccacgcagucugccgagguuggagcugcugagaugacgcu	96	mml-mir-622-9-5p	22260685	22260705	cugaucucagcagauugagga	mml-mir-622-9-3p	22260727	22260747	gcagucugccgagguuggagc
		yes	ENSMMUT00000078862	mml-mir-622-10	CM002994.2	+	54357773	54357868	agaggagcuggacaaguacuggucucagcagauugaggagagcaccacagugguccccaugcagucugccgagguuggagcugcugagcugaugcu	96	mml-mir-622-10-5p	54357791	54357811	cuggucucagcagauugagga	mml-mir-622-10-3p	54357833	54357853	gcagucugccgagguuggagc
		yes	ENSMMUT00000048375	mml-mir-622-11	CM002977.3	-	112619412	112619504	acaggagcuagacaaguacuggucucagcagacugaggagggcgccacaguggucaccacgcagucugcugagguuggaguugcuaagauggc	93	mml-mir-622-11-5p	112619434	112619454	ucucagcagacugaggagggc	mml-mir-622-11-3p	112619471	112619491	cgcagucugcugagguuggag
		yes	ENSMMUT00000048390	mml-mir-622-12	CM002979.2	-	85457117	85457212	agaggagcuagacaaguacuggucucagaagauuguggagagcaccacaguggucaccacgcaguccgcugagguuggagcugcugcgaugaugcu	96	mml-mir-622-12-5p	85457136	85457156	uggucucagaagauuguggag	mml-mir-622-12-3p	85457177	85457197	gcaguccgcugagguuggagc
		yes	ENSMMUT00000048970	mml-mir-622-13	CM002986.2	-	53082874	53082969	agaggaucuagaaaaguacuggucucagcagauugaggagagcaccacaguggucacuacucaaucugcugagguuggagcugcugaggugacacu	96	mml-mir-622-13-5p	53082893	53082913	uggucucagcagauugaggag	mml-mir-622-13-3p	53082934	53082954	ucaaucugcugagguuggagc
yes	yes	yes	ENSMMUT00000036946	mml-mir-624	CM002991.3	-	92408704	92408801	aaugcuguuucaagguaguaccaguaucuuguguucaguggaaccaagguaaacacaagauacugguauuaccuugagauagcauuaacaccuaagug	98	mml-mir-624-5p	NA	NA	NA	mml-mir-624-3p	92408757	92408777	cacaagauacugguauuaccu
yes	yes	yes	ENSMMUT00000049224	mml-mir-625	CM002991.3	+	127503454	127503536	aggguagagguauaaggggggaaaguucugcaggccuguaauuagaucucaggacuguagaacuuucucccucaccucugcccu	84	mml-mir-625-5p	NA	NA	NA	mml-mir-625-3p	127503505	127503525	ggacuguagaacuuucucccu
	yes			mml-mir-626	CM002991.3	+	18096598	18096692	accgauaucuuugucuuauuucugagcugagggguuauuuuuaugcagucuaaaugaucucagcuguccgaaaaugucuucaaguuuaaaggcuu	95	mml-mir-626-5p	NA	NA	NA	mml-mir-626-3p	18096659	18096677	agcuguccgaaaaugucuu
yes	yes	yes	ENSMMUT00000048557	mml-mir-627	CM002991.3	-	18594909	18595005	uacuuauuaccgguagugagucuguaagaaaagaggagguggugguuuuccuccucuuuucuuagagacucacuaccaguaauaagaaauacuacua	97	mml-mir-627-5p	18594925	18594946	ugagucuguaagaaaagaggag	mml-mir-627-3p	18594960	18594981	uccucuuuucuuagagacucac
yes	yes	yes	ENSMMUT00000036853	mml-mir-628	CM002991.3	-	31855108	31855202	auagcuguugugucacuuccucaugcugacauauuuacuagaggguaaaauuaauaaccuucuaguaagaguggcagucgaagggaaggacucau	95	mml-mir-628-5p	31855130	31855151	augcugacauauuuacuagagg	mml-mir-628-3p	31855168	31855188	ucuaguaagaguggcagucga
yes	yes	yes	ENSMMUT00000036918	mml-mir-631	CM002991.3	-	52678504	52678578	guggagagccugguuagaccuggcccagaccucagcuacacaagcugauggacugagucaggggccacacucucc	75	mml-mir-631-5p	52678519	52678539	agaccuggcccagaccucagc	mml-mir-631-3p	NA	NA	NA
	yes	yes	ENSMMUT00000036950	mml-mir-632	CM002994.2	+	26364686	26364779	cgccuccugccgcagugccugacgggaggcggagcggcgaacgaggccgucggccauuuugugucugcuuccugugggacgcggucguagccgu	94	mml-mir-632-5p	NA	NA	NA	mml-mir-632-3p	26364746	26364764	gugucugcuuccuguggga
	yes	yes	ENSMMUT00000048597	mml-mir-633	CM002994.2	+	56540971	56541068	aaccucucuuagccucuguuucuuuacugugguagauacuauuagccuaaaauaagaaggcuaauaguaucuaccacaauaaaauuguugugaugaua	98	mml-mir-633-5p	NA	NA	NA	mml-mir-633-3p	56541031	56541053	cuaauaguaucuaccacaauaaa
	yes			mml-mir-633-2	JSUE03291672.1	+	161	258	aaccucucuuagccucuguuucuuuacugugguagauacuauuagccuaaaauaagaaggcuaauaguaucuaccacaauaaaauuguugugaugaua	98	mml-mir-633-2-5p	NA	NA	NA	mml-mir-633-2-3p	221	243	cuaauaguaucuaccacaauaaa
	yes	yes	ENSMMUT00000048363	mml-mir-636	CM002994.2	-	70494246	70494344	uggcggccugggcgggagcgcgcgggcggggccggccccgcugccuggaauuaaccccgcugugcuugcucgucccgccugcagcccuaggcggcgucg	99	mml-mir-636-5p	NA	NA	NA	mml-mir-636-3p	70494306	70494328	ugugcuugcucgucccgccugca
yes	yes	yes	ENSMMUT00000048392	mml-mir-638	CM002996.3	+	10760446	10760545	guaagcgggcgcggcagggaucgcgggcgggcggcggccuagggugcggagggcggaccgggaauggcgcucccugcgccgccggcguaacugcggcgcu	100	mml-mir-638-5p	10760461	10760485	agggaucgcgggcgggcggcggccu	mml-mir-638-3p	NA	NA	NA
	yes			mml-mir-639	CM002996.3	+	14559563	14559660	uggccgacggggcgcgcgcggccgggaggggcggggcggacgcacagccgcguuuagucuagcgcagcggucgcgagcgcucuggguauccuguccug	98	mml-mir-639-5p	NA	NA	NA	mml-mir-639-3p	14559623	14559645	agcgcagcggucgcgagcgcucu
	yes	yes	ENSMMUT00000036964	mml-mir-640	CM002996.3	+	19550508	19550603	gugacccugggcaaguuccugaagaucaaacacaucagaucccuuaucuguaaaaugggcaugauccaggaaccugccucuaugguugccuuggag	96	mml-mir-640-5p	NA	NA	NA	mml-mir-640-3p	19550568	19550588	augauccaggaaccugccucu
	yes	yes	ENSMMUT00000048543	mml-mir-642	CM002996.3	+	41017617	41017703	aucugagcugggagggucccucuccaaaugugucuuggggugggggaucaagacacauuuggagagggaaccucccaacucggccuc	87	mml-mir-642-5p	41017632	41017653	gucccucuccaaaugugucuug	mml-mir-642-3p	NA	NA	NA
	yes	yes	ENSMMUT00000049024	mml-mir-643	CM002996.3	+	47493538	47493634	accaacugauacgcauuaucuacgugagcuagaauacaaguaguuggugucuucagagacacuuguauucuagcucagguagauacugaauggaaaa	97	mml-mir-643-5p	NA	NA	NA	mml-mir-643-3p	47493598	47493619	acuuguauucuagcucagguag
	yes	yes	ENSMMUT00000036933	mml-mir-644	CM002992.3	-	29672190	29672281	uuuuauuuaguauucuuccaucaguguucauaagggauguuggucuguaguuuucuuauaguguggcuugcuuagagcaaaggugguucccu	92	mml-mir-644-5p	NA	NA	NA	mml-mir-644-3p	29672249	29672267	aguguggcuugcuuagagc
	yes	yes	ENSMMUT00000036903	mml-mir-648	CM002992.3	-	60310149	60310242	agcacagacgccuccaagugugcagggcacugaugggggccagggcaggcccagccaaagugcaggaccuggcacuuagucggaggugaggaug	94	mml-mir-648-5p	60310164	60310182	aagugugcagggcacugau	mml-mir-648-3p	NA	NA	NA
	yes			mml-mir-649	CM002992.3	+	62589175	62589271	gcccuagccaaauacuguauuuuuuaucaacauuugguugaaaaacaucuguguauuaguaaaccuguguuguucaagaguccgcugugcuuugcug	97	mml-mir-649-5p	NA	NA	NA	mml-mir-649-3p	62589235	62589256	aaaccuguguuguucaagaguc
	yes	yes	ENSMMUT00000078090	mml-mir-650a-1	CM002992.3	+	64625556	64625650	cagugcugggaucucaggaggcagcgcucucaggacgucuccaccauggucugggcucugcuccuccucacccuccucacucagggcacagguga	95	mml-mir-650a-1-5p	64625571	64625591	aggaggcagcgcucucaggac	mml-mir-650a-1-3p	NA	NA	NA
		yes	ENSMMUT00000048369	mml-mir-650a-1-1	CM002992.3	+	64348316	64348410	cagugcuggggucucagaaggcagcgcucucaggacgucuccaccauggcuuggacucugcuccucgucacccuccucacucaaggcacagguga	95	mml-mir-650a-1-1-5p	64348331	64348351	agaaggcagcgcucucaggac	mml-mir-650a-1-1-3p	64348366	64348386	uuggacucugcuccucgucac
	yes	yes	ENSMMUT00000076569	mml-mir-650a-2	CM002992.3	+	64591051	64591145	cagugcugggaucucaggaggcagcgcucucaggacuucuccaccauggucugggcucugcuccuccucacccuccucacucagggcacagguga	95	mml-mir-650a-2-5p	64591066	64591086	aggaggcagcgcucucaggac	mml-mir-650a-2-3p	NA	NA	NA
		yes	ENSMMUT00000038186	mml-mir-650a-3	CM002992.3	+	64671473	64671564	caguguugggucucaggaggcagugcucucaggacaucaccauggccugggcucugcuccuccucccccuccucacucaggacacaggugau	92	mml-mir-650a-3-5p	64671487	64671508	aggaggcagugcucucaggaca	mml-mir-650a-3-3p	64671517	64671538	gccugggcucugcuccuccucc
		yes	ENSMMUT00000056924	mml-mir-650a-4	CM002992.3	+	64565869	64565963	cagugcuggggucucaggaggcagcgcucucaggacgucuccaccauggccugggcucugcuccuccucacccuccucacucagggcacagguga	95	mml-mir-650a-2-5p	64565884	64565904	aggaggcagcgcucucaggac	mml-mir-650a-2-3p	64565919	64565939	cugggcucugcuccuccucac
	yes			mml-mir-650b	JSUE03147321.1	+	535	629	cagugcuggggucucaggaggcagcgcucucgggacaucuccaccauggccugggaucugcuccucuucacccuccucacucagggcacagguga	95	mml-mir-650b-5p	550	570	aggaggcagcgcucucgggac	mml-mir-650b-3p	NA	NA	NA
	yes			mml-mir-650c	CM002992.3	+	64325401	64325491	cagugcuggggugucaggaggcagcgcucucagucuccaccauggccugggcucugcuccuccucacucuccucacucauggcacggguga	91	mml-mir-650c-5p	64325416	64325433	aggaggcagcgcucucag	mml-mir-650c-3p	NA	NA	NA
	yes			mml-mir-650d	CM002992.3	+	64545286	64545377	cagugcuggggucucaggagacagugcugucgggacgucuccaccauggccugggcucugcuccuccucacccuucucacucaaggcacagg	92	mml-mir-650d-5p	64545301	64545321	aggagacagugcugucgggac	mml-mir-650d-3p	NA	NA	NA
	yes	yes	ENSMMUT00000036998	mml-mir-651	CM002997.3	+	7146167	7146263	aagcuaucacugcuuuuuagaauaagcuugacuuuuguucaaauaaaaacgcaaaaggaaaguguaucuuaaaaggcaaugacaguuuaauauguuu	97	mml-mir-651-5p	7146182	7146203	uuuagaauaagcuugacuuuug	mml-mir-651-3p	NA	NA	NA
yes	yes	yes	ENSMMUT00000048686	mml-mir-652	CM002997.3	+	104120060	104120157	acgaauggcuaugcacugcacaacccuaggagagggugccauucacauagacuauaauugaauggcgccacuaggguugugcagugcacaaccugcac	98	mml-mir-652-5p	NA	NA	NA	mml-mir-652-3p	104120120	104120140	aauggcgccacuaggguugug
yes	yes	yes	ENSMMUT00000036845	mml-mir-653	CM002984.2	-	118802354	118802449	uucauuccuucaguguugaaacaaucucuacugaaccagcuucaaacaaauucacuggaguuuguuucaauauugcaagaaugauaagauggaagc	96	mml-mir-653-5p	118802366	118802386	guguugaaacaaucucuacug	mml-mir-653-3p	118802404	118802425	uucacuggaguuuguuucaaua
yes	yes	yes	ENSMMUT00000036856	mml-mir-654	CM002991.3	+	163374225	163374305	ggguaaguggaaagauggugggccgcagaacaugugcugaguucgugccauaugucugcugaccaucaccuuuagaagccc	81	mml-mir-654-5p	163374240	163374261	uggugggccgcagaacaugugc	mml-mir-654-3p	163374275	163374296	uaugucugcugaccaucaccuu
yes	yes	yes	ENSMMUT00000048613	mml-mir-656	CM002991.3	+	163400519	163400596	cugaaauagguugucugugagguguucacuuucuauaugaugaauauuauacagucaaccucuuuccgauaucgaauc	78	mml-mir-656-5p	163400526	163400546	agguugucugugagguguuca	mml-mir-656-3p	163400561	163400581	aauauuauacagucaaccucu
	yes	yes	ENSMMUT00000038153	mml-mir-657	CM002994.2	-	74986304	74986382	ggaggagaggguccuggagaagcguggacggcuccagguggguucuggcagguccucacccucucuaggccccauucuc	79	mml-mir-657-5p	NA	NA	NA	mml-mir-657-3p	74986350	74986372	ggcagguccucacccucucuagg
	yes	yes	ENSMMUT00000036852	mml-mir-660	CM002997.3	+	50020567	50020663	cugcuccuucucccauacccauugcauaucggaguuguaaauucucaaaacaccuccugugugcauggauuacaggagggugagccuugucaucgug	97	mml-mir-660-5p	50020582	50020603	uacccauugcauaucggaguug	mml-mir-660-3p	50020618	50020639	accuccugugugcauggauuac
	yes			mml-mir-661	CM002985.3	-	143206016	143206113	ggagaggcugugcuguggggcaggcgcuggccuggguggccugagcccugauuuugggcugccuggguaucuggcccgugcgugaccuuggggcggcu	98	mml-mir-661-5p	NA	NA	NA	mml-mir-661-3p	143206075	143206098	ugccuggguaucuggcccgugcgu
	yes	yes	ENSMMUT00000048374	mml-mir-662	CM002993.2	+	758887	758981	gcuguugaggcuguacagccaggaccugacggugggguggcuucgggccuucugcaggucucccacguuguggcccagcagcgcagucacguugc	95	mml-mir-662-5p	NA	NA	NA	mml-mir-662-3p	758947	758967	ucccacguuguggcccagcag
	yes			mml-mir-663-1	JSUE03071392.1	-	20	109	ccguucggcgucccaggcggggcgcugcgggaccgcccucgugucuguggcggugggaucccguggccguguuuuccugguggcccggcc	90	mml-mir-663-1-5p	34	55	aggcggggcgcugcgggaccgc	mml-mir-663-1-3p	NA	NA	NA
	yes			mml-mir-663-2	JSUE03072359.1	+	1241	1330	ccguucggcgucccaggcggggcgcugcgggaccgcccucgugucuguggcggugggaucccguggccguguuuuccugguggcccggcc	90	mml-mir-663-2-5p	1255	1276	aggcggggcgcugcgggaccgc	mml-mir-663-2-3p	NA	NA	NA
	yes			mml-mir-663-3	JSUE03078330.1	+	985	1074	ccguucggcgucccaggcggggcgcugcgggaccgcccucgugucuguggcggugggaucccguggccguguuuuccugguggcccggcc	90	mml-mir-663-3-5p	999	1020	aggcggggcgcugcgggaccgc	mml-mir-663-3-3p	NA	NA	NA
	yes			mml-mir-663-4	JSUE03089943.1	+	776	865	ccguucggcgucccaggcggggcgcugcgggaccgcccucgugucuguggcggugggaucccguggccguguuuuccugguggcccggcc	90	mml-mir-663-4-5p	790	811	aggcggggcgcugcgggaccgc	mml-mir-663-4-3p	NA	NA	NA
	yes			mml-mir-663-5	JSUE03091487.1	+	1354	1443	ccguucggcgucccaggcggggcgcugcgggaccgcccucgugucuguggcggugggaucccguggccguguuuuccugguggcccggcc	90	mml-mir-663-5-5p	1368	1389	aggcggggcgcugcgggaccgc	mml-mir-663-5-3p	NA	NA	NA
	yes			mml-mir-663-6	JSUE03101990.1	-	133	222	ccguucggcgucccaggcggggcgcugcgggaccgcccucgugucuguggcggugggaucccguggccguguuuuccugguggcccggcc	90	mml-mir-663-6-5p	147	168	aggcggggcgcugcgggaccgc	mml-mir-663-6-3p	NA	NA	NA
	yes			mml-mir-663-7	JSUE03146183.1	-	84	173	ccguucggcgucccaggcggggcgcugcgggaccgcccucgugucuguggcggugggaucccguggccguguuuuccugguggcccggcc	90	mml-mir-663-7-5p	98	119	aggcggggcgcugcgggaccgc	mml-mir-663-7-3p	NA	NA	NA
	yes			mml-mir-663-8	JSUE03153161.1	-	136	225	ccguucggcgucccaggcggggcgcugcgggaccgcccucgugucuguggcggugggaucccguggccguguuuuccugguggcccggcc	90	mml-mir-663-8-5p	150	171	aggcggggcgcugcgggaccgc	mml-mir-663-8-3p	NA	NA	NA
	yes			mml-mir-663-9	JSUE03180500.1	-	3302	3391	ccguucggcgucccaggcggggcgcugcgggaccgcccucgugucuguggcggugggaucccguggccguguuuuccugguggcccggcc	90	mml-mir-663-9-5p	3316	3337	aggcggggcgcugcgggaccgc	mml-mir-663-9-3p	NA	NA	NA
	yes			mml-mir-663-10	JSUE03184213.1	-	2354	2443	ccguucggcgucccaggcggggcgcugcgggaccgcccucgugucuguggcggugggaucccguggccguguuuuccugguggcccggcc	90	mml-mir-663-10-5p	2368	2389	aggcggggcgcugcgggaccgc	mml-mir-663-10-3p	NA	NA	NA
	yes			mml-mir-663-11	JSUE03210270.1	+	19318	19407	ccguucggcgucccaggcggggcgcugcgggaccgcccucgugucuguggcggugggaucccguggccguguuuuccugguggcccggcc	90	mml-mir-663-11-5p	19332	19353	aggcggggcgcugcgggaccgc	mml-mir-663-11-3p	NA	NA	NA
yes		yes	ENSMMUT00000070448	mml-miR-664	CM002978.2	-	70560617	70560768	cagggcagcuucccuguucuguuaauuaaacuuugggacauugaaaugggcuaggggagaugauuggguagaaagcauuauuuuauucauuugccucccagccuacaaaaaugccugguugggucuaauacaucaacaguuaaagaugccug	152	mml-miR-664-5p	NA	NA	NA	mml-miR-664-3p	70560702	70560723	uucauuugccucccagccuaca
yes	yes	yes	ENSMMUT00000059040	mml-mir-664	CM002977.3	+	146157567	146157624	cuggcuagggaaaaugauuggauagaaaauguuauucuauucauuuauccccagccua	58	mml-mir-664-5p	NA	NA	NA	mml-mir-664-3p	146157604	146157624	uauucauuuauccccagccua
	yes	yes	ENSMMUT00000048364	mml-mir-665	CM002991.3	+	163208516	163208587	ucuccucgaggggucucugccucuacccaggacucuuucaugaccaggaggcugaggccccucacaggcggc	72	mml-mir-665-5p	163208558	163208577	accaggaggcugaggccccu	mml-mir-665-3p	NA	NA	NA
yes	yes	yes	ENSMMUT00000048380	mml-mir-668	CM002991.3	+	163389270	163389335	gguaagugcgccucgggugagcaugcacuuaauguggguguaugucacucggcucggcccacuacc	66	mml-mir-668-5p	NA	NA	NA	mml-mir-668-3p	163389312	163389334	ugucacucggcucggcccacuac
yes				mml-miR-669a	CM002990.2	-	66502803	66502905	auauacauaauacacauauauacacacauacacauacacacacacguauauacauauauauguguguguguguguguguauauauaugcacauguagagaugg	103	mml-miR-669a-5p	66502819	66502841	uauauacacacauacacauacac	mml-miR-669a-3p	66502872	66502890	guguguguguauauauaug
yes				mml-miR-669e	NC_007871.1	+	127088132	127088284	augcgugugugcuugugggcauguaugugugcaucugugcaugcaugugugcauguguggugcaugcguggguaugaguguccgugugugcaugugugugugcauguguauguguguaucugugcaugcaugugcaucuguggugcaugcgug	153	mml-miR-669e-5p	127088157	127088174	ugugugcaucugugcaug	mml-miR-669e-3p	127088242	127088259	uguguguaucugugcaug
	yes	yes	ENSMMUT00000048395	mml-mir-670	CM002988.2	-	22471659	22471747	gguggaccugaugucccugaguguauguggugaaccugaauuugccuuggguuuccucauauucauucaggagugucaguugccccuuc	89	mml-mir-670-5p	22471672	22471692	ucccugaguguauguggugaa	mml-mir-670-3p	22471710	22471729	uuuccucauauucauucagg
yes	yes	yes	ENSMMUT00000048368	mml-mir-671	CM002984.2	+	177464476	177464593	gcaggugaacuggcaggccaggaagaggaggaagcccuggaggggcuggaggugauggauguuuuccuccgguucucagggcuccaccucuuucgggccguagagccagggcuggugc	118	mml-mir-671-5p	177464504	177464526	aggaagcccuggaggggcuggag	mml-mir-671-3p	177464543	177464563	uccgguucucagggcuccacc
yes	yes	yes	ENSMMUT00000048377	mml-mir-675	CM002988.2	-	1833156	1833228	cccagggucuggugcggagagggcccacaguggacuuggugacacuguaugcccucaccgcucagccccuggg	73	mml-mir-675-5p	1833165	1833187	uggugcggagagggcccacagug	mml-mir-675-3p	1833200	1833221	cuguaugcccucaccgcucagc
	yes	yes	ENSMMUT00000048387	mml-mir-676-1	CM002997.3	+	64701793	64701901	agacuucauaucagauucucaccugaaugcaugacucuucaaccucaggacuugcagaauuaauggaaugccguccuaagguuguugaguugugcguuucugggcauuu	109	mml-mir-676-1-5p	64701827	64701848	cucuucaaccucaggacuugca	mml-mir-676-1-3p	64701863	64701883	ccguccuaagguuguugaguu
	yes			mml-mir-676-2	JSUE03075159.1	-	669	725	cucuucaaccucaggacuugcagaauuaauggaaugccguccuaagguuguugaguu	57	mml-mir-676-2-5p	669	690	cucuucaaccucaggacuugca	mml-mir-676-2-3p	705	725	ccguccuaagguuguugaguu
yes				mml-miR-703c	CM002980.3	+	136177642	136177790	uuaaguuuaauagucaaaggcugguuaauguuaacaaugcauccuaaaaccuucagaaggaaaggagaauguuuuaugaaccauuugggauuuuuuuuuuuuuuucaugaagcaguuuuaaguuacuagguuguuuguuuguuuuugag	149	mml-miR-703c-5p	136177693	136177712	uucagaaggaaaggagaaug	mml-miR-703c-3p	136177735	136177756	uuuuuuuuuuuucaugaagcag
yes				mml-miR-706d	NC_007868.1	+	114105202	114105353	uagccagguauggucacuugcaccuguagccugggugacagagagaaacccugucucaaaaaaaaaaaaaaaaaaguaaacacauauuuuuuuuuaagagacagggugucacucugucacccaggcuggaguacaguggugcaguaauggcu	152	mml-miR-706d-5p	114105228	114105247	uagccugggugacagagaga	mml-miR-706d-3p	114105313	114105333	cucugucacccaggcuggagu
yes	yes	yes	ENSMMUT00000048580	mml-mir-708	CM002988.2	-	71642560	71642647	aacugcccucaaggagcuuacaaucuagcuggggguaaaugacuugcacaugaacacaacuagacugugagcuucuagagggcaggga	88	mml-mir-708-5p	71642570	71642592	aaggagcuuacaaucuagcuggg	mml-mir-708-3p	71642616	71642638	caacuagacugugagcuucuaga
yes				mml-miR-709ad	NC_007862.1	+	157066558	157066756	ugugguggaauucucccgagcucuagugauccucccgccucggccucccaaaguguugggauuaccggcaugagccaccguacccggccauaaguuuauuuuucuaaauguggccagaugcgguaguucacaccuguaauuccagcccuuugggaggcagaggcaggaggaucacuugagcucaggaguucaagaccag	199	mml-miR-709ad-5p	157066582	157066600	agugauccucccgccucgg	mml-miR-709ad-3p	157066723	157066740	ggaggaucacuugagcuc
yes				mml-miR-709aj	CM002991.3	+	127163136	127163284	cgaggaugguggcgggugccuguaaucccagcuacucaggaggcagaggcaggaggaucacuugaaaccaggagguggcaguuguagugagccaaggucaugccacugcacuccagccugggcaaaaagagcgagauuccgucucaaaa	149	mml-miR-709aj-5p	127163164	127163185	cagcuacucaggaggcagaggc	mml-miR-709aj-3p	127163239	127163259	cacugcacuccagccugggca
yes				mml-miR-709al	CM002987.3	-	25186770	25186868	gcuacucaggaggcagaggcaggaggauagcuugagccuaggaguucaaggcugcagucagcuaugauugugccacugcacucaagccugggcaacaga	99	mml-miR-709al-5p	25186790	25186807	aggaggauagcuugagcc	mml-miR-709al-3p	25186821	25186842	cugcagucagcuaugauugugc
yes				mml-miR-709aq	CM002992.3	+	61046172	61046264	cagucuugcuauguugcucaggcuggucucgaacuccugacuucaagugaucuucccaccucagcuucccaaagggcugggauuacaggugug	93	mml-miR-709aq-5p	61046123	61046140	gguugaggccacagugag	mml-miR-709aq-3p	61046190	61046208	caggcuggucucgaacucc
yes				mml-miR-709as	CM002989.3	-	121589449	121589532	ugacugagcguguuggcucaugccuauaaucccagcacuuugggaggcagaggcaggaggaucacuugggcccaggaguuugag	84	mml-miR-709as-5p	121589460	121589482	ugcaugacugagcguguuggcuc	mml-miR-709as-3p	121589500	121589520	ggcaggaggaucacuugggcc
yes				mml-miR-709b	CM002989.3	-	122201316	122201464	aacacuuugggaggcagaggcaggaggacugcuugagcccaggaguuugagaccagucugagcaacagagcaagaccucguagcuacaaaaaauauaaaaauuagcugggcaugguggcacguaccugcagucucagcuacuugggagg	149	mml-miR-709b-5p	122201351	122201375	agcccaggaguuugagaccagucug	mml-miR-709b-3p	122201407	122201426	aauauaaaaauuagcugggc
yes				mml-miR-709c	CM002989.3	+	122356252	122356422	ucucuacaaaaaauuuaaaaauuagccagaugcaguggcacaugccuguggccccagcuacccaggaggcagaggcaggaggauagcuugagccuagaaguucaaggcugcagugagcuaugauucugcugcuguacuccagccugggugacagagcaagacccugucucu	171	mml-miR-709c-5p	122356294	122356309	ugccuguggccccagc	mml-miR-709c-3p	122356395	122356413	cugggugacagagcaagac
yes				mml-miR-709m	CM002993.2	-	29330412	29330497	aagaaacaagguuucauccaggcacaguggcucacaccuguaaucucagcacuuugggaggcagaggcaggaggauugcuugagcc	86	mml-miR-709m-5p	29330301	29330319	cucaagcagucuucccacc	mml-miR-709m-3p	29330480	29330497	aggaggauugcuugagcc
yes				mml-miR-709n	CM002992.3	-	48918781	48918979	uggucuugaacuccugaccucaagugauccaacugccucggccucccaaagugcugggauuacaggugugagccacugcaccuggccugggguccuuuuaaaaauagaauuaggccagguacaaugccuuaugccucuaaucccagcacuuugggaggcagaggcaggaggaucacuuaaggccaggcguucaagacca	199	mml-miR-709n-5p	48918816	48918834	ccucggccucccaaagugc	mml-miR-709n-3p	48918929	48918946	cuuugggaggcagaggca
yes				mml-miR-709w	CM002980.3	-	123356076	123356174	aucccagcuacucgggaggcagaggcaggaggaucgcuugaaccugggaggcagagguugcauugaaccgagauugugccacugcacuucagucugggu	99	mml-miR-709w-5p	123356099	123356119	ggcaggaggaucgcuugaacc	mml-miR-709w-3p	123356133	123356157	uugcauugaaccgagauugugccac
yes				mml-miR-709z	CM002983.2	+	13752004	13752202	aacuccugaccucaggugauccgccugccuuggccucccaaaguucuggaauugcaggcgugagccaccaugccuggcccucuccucuuaguaaaaugaaaaaucucuuaagaagucuuugauugggcacuauggcucaugccugucauccuagcacuuugggaggcagaggcaggaggaucauuugaguccaggaguu	199	mml-miR-709z-5p	13752007	13752028	uccugaccucaggugauccgcc	mml-miR-709z-3p	13752181	13752201	ggaucauuugaguccaggagu
	yes	yes	ENSMMUT00000048393	mml-mir-711	CM002980.3	+	93872611	93872686	acugacuuugagucucuccucagggugcugcaggcaaagcuggggacccagggagagacguaagugaggggagaug	76	mml-mir-711-5p	NA	NA	NA	mml-mir-711-3p	93872653	93872674	gggacccagggagagacguaag
	yes	yes	ENSMMUT00000048733	mml-mir-758	CM002991.3	+	163361327	163361414	gccuggauacgugagaugguugaccagagagcacacgcuuuauaugugccguuugugaccugguccacuaccccucaguaucuaaugc	88	mml-mir-758-5p	163361342	163361363	augguugaccagagagcacacg	mml-mir-758-3p	163361378	163361399	uuugugaccugguccacuaccc
	yes	yes	ENSMMUT00000048410	mml-mir-759	CM002990.2	+	32078432	32078527	ggauuauaauaaauuaaaugccuaaacuggcagagugcaaacaauuuugacucagaucuaaauguuugcacuggcuguuuaaacauuuaauuuguu	96	mml-mir-759-5p	32078461	32078482	gcagagugcaaacaauuuugac	mml-mir-759-3p	NA	NA	NA
yes	yes	yes	ENSMMUT00000048411	mml-mir-760	CM002977.3	+	94513631	94513710	ggcgcgucgccccccucaguccaccagagcccggauaccucagaaauucggcucugggucuguggggagcgaaaugcaac	80	mml-mir-760-5p	NA	NA	NA	mml-mir-760-3p	94513679	94513698	cggcucugggucugugggga
	yes	yes	ENSMMUT00000048747	mml-mir-761	CM002977.3	-	51406065	51406134	uggcaagaggaggagcagcagggugaaacugacacaguucuggugaguuucacuuugcugcuccuccuga	70	mml-mir-761-5p	51406079	51406100	gcagcagggugaaacugacaca	mml-mir-761-3p	NA	NA	NA
	yes	yes	ENSMMUT00000051491	mml-mir-762-1	CM002984.2	-	56600352	56600422	gcccggcuccgggucucggcccguacgguccggccggccaugcuggcggggcuggggccggagccgagccc	71	mml-mir-762-1-5p	NA	NA	NA	mml-mir-762-1-3p	56600399	56600420	ggggcuggggccggagccgagc
	yes	yes	ENSMMUT00000052022	mml-mir-762-2	CM002994.2	+	11919362	11919432	gcccggcuccgggucucggcccguacgguccggccggccaugcuggcggggcuggggccggagccgagccc	71	mml-mir-762-2-5p	NA	NA	NA	mml-mir-762-2-3p	11919409	11919430	ggggcuggggccggagccgagc
	yes	yes	ENSMMUT00000052901	mml-mir-762-3	CM002993.2	+	28702574	28702644	gcccggcuccgggucucggcccguacgguccggccggccaugcuggcggggcuggggccggagccgagccc	71	mml-mir-762-3-5p	NA	NA	NA	mml-mir-762-3-3p	28702621	28702642	ggggcuggggccggagccgagc
		yes	ENSMMUT00000057365	mml-mir-762-4	CM002981.2	-	26483136	26483218	ggcccggcuccgggucucggcccguacgguccggccggccaugcuggcggggcuggagccggagccgagcccgcggcggggcc	83	mml-mir-762-4-5p	26483149	26483170	gucucggcccguacgguccggc	mml-mir-762-4-3p	26483184	26483205	ggggcuggagccggagccgagc
		yes	ENSMMUT00000075910	mml-mir-762-5	CM002981.2	+	116139950	116140032	ggcccggcuccgggucucggcccguacgguccggccggccaugcuggcggggcuggggccggagccgagccugcggcggggcc	83	mml-mir-762-5-5p	116139963	116139984	gucucggcccguacgguccggc	mml-mir-762-5-3p	116139998	116140019	ggggcuggggccggagccgagc
		yes	ENSMMUT00000051319	mml-mir-762-6	CM002989.3	-	10960605	10960687	ggcccggcuccgggucucggcccguacgguccggccggccaugcuggcguggcuggggccggagccgagcccgcggcggggcc	83	mml-mir-762-6-5p	10960622	10960643	cggcccguacgguccggccggc	mml-mir-762-6-3p	10960653	10960674	guggcuggggccggagccgagc
		yes	ENSMMUT00000051265	mml-miR-762-7	CM002991.3	-	59743495	59743577	ggcccggcuccgggucucggcccguacggucuggccggccaugcuggcggggcuggggccggagccgagcccgcggcggggcc	83	mml-miR-762-7-5p	NA	NA	NA	mml-miR-762-7-3p	59743543	59743564	ggggcuggggccggagccgagc
		yes	ENSMMUT00000051722	mml-miR-762-8	CM002997.3	+	136863151	136863235	ggcccggcuccgggucucggcccguacgguccggccggcauacugcuggcggggcuggggccggagccgagcccgcggcggggcc	85	mml-miR-762-8-5p	NA	NA	NA	mml-miR-762-8-3p	136863201	136863222	ggggcuggggccggagccgagc
		yes	ENSMMUT00000053049	mml-miR-762-9	CM002977.3	-	91880049	91880131	ggcccggcuccgggucucggcccguacaguccggccggccaugcuggcggggcuggggccggagccgagcccgcgguggggcc	83	mml-miR-762-9-5p	NA	NA	NA	mml-miR-762-9-3p	91880097	91880118	ggggcuggggccggagccgagc
		yes	ENSMMUT00000062254	mml-miR-762-10	CM002978.2	-	53145487	53145569	ggcccggcuccgggucucggcccguacaguccggccggccaugcuggcggggcuggggccggagccgagcccgcgguggggcc	83	mml-miR-762-10-5p	NA	NA	NA	mml-miR-762-10-3p	53145535	53145556	ggggcuggggccggagccgagc
		yes	ENSMMUT00000077919	mml-miR-762-11	CM003438.1	+	3277012	3277094	ggcccggcuccgggucucggcccguaugguccggcuggccaugcuggcggggcuggggccagagccgagcccgcggcggggcc	83	mml-miR-762-11-5p	NA	NA	NA	mml-miR-762-11-3p	3277060	3277081	ggggcuggggccagagccgagc
yes	yes	yes	ENSMMUT00000048911	mml-mir-764	CM002997.3	+	108514920	108515015	aaucuaggaggcaggugcucacuuguccuccuccaugguuggaaaauacaggggggaggccauaguggcaacugucaccaugauuaauuucguugg	96	mml-mir-764-5p	108514933	108514951	ggugcucacuuguccuccu	mml-mir-764-3p	NA	NA	NA
	yes	yes	ENSMMUT00000048404	mml-mir-765	CM002977.3	-	131580005	131580118	uuuaggggcugaugaaaguggaguucaguagacaacccuuuucaagcccugcaagaaacugggguuucuggaggagagggaaggugcugaaggggcugcucucgugagccugaa	114	mml-mir-765-5p	NA	NA	NA	mml-mir-765-3p	131580073	131580093	uggaggagagggaaggugcug
yes	yes	yes	ENSMMUT00000048406	mml-mir-767	CM002997.3	-	146010639	146010748	gcuuuuauauuguagguuuuugcucaugcaccaugguugucugagcaugcagcaugcuugucugcucauaccccaugguuucugagcaggaaucuucauugucuacugcu	110	mml-mir-767-5p	146010665	146010687	ugcaccaugguugucugagcaug	mml-mir-767-3p	146010699	146010721	ucugcucauaccccaugguuucu
yes	yes	yes	ENSMMUT00000048401	mml-mir-769	CM002996.3	+	41396588	41396648	ugagaccucuggguucugagcugugauguugcucucgagcugggaucuccggggucuuggu	61	mml-mir-769-5p	41396588	41396608	ugagaccucuggguucugagc	mml-mir-769-3p	41396628	41396648	ugggaucuccggggucuuggu
	yes	yes	ENSMMUT00000048408	mml-mir-770	CM002991.3	+	163184992	163185089	aggagccaccuuccgagccuccaguaccacgugucagggccacaugagcugggccucgugggccugauguggugcuggggccucaggggucugcucuu	98	mml-mir-770-5p	163185011	163185033	uccaguaccacgugucagggcca	mml-mir-770-3p	NA	NA	NA
yes	yes	yes	ENSMMUT00000048409	mml-mir-802	CM002984.2	-	10995704	10995797	guucuguuauuugcaaucaguaacaaagauucauccuuguguccaucaugcagcaaggagaaucuuugucacuuaguguaauuaauagcuggac	94	mml-mir-802-5p	10995721	10995743	caguaacaaagauucauccuugu	mml-mir-802-3p	NA	NA	NA
	yes	yes	ENSMMUT00000049100	mml-mir-873	CM002986.2	+	54963981	54964090	gaauaaguuugugugcauuugcaggaacuugugagucuccuauugaaaaugaacaggagacugaugaguucccgggaacacccacaaaucuuccuacucauuucuacugc	110	mml-mir-873-5p	54964001	54964020	gcaggaacuugugagucucc	mml-mir-873-3p	54964038	54964057	agacugaugaguucccggga
	yes	yes	ENSMMUT00000049222	mml-mir-874	CM002982.3	-	135351570	135351647	uuagcccugcggccccacgcaccaggguaagagagagucucgcuuccugcccuggcccgagggaccgacuggcugggc	78	mml-mir-874-5p	135351579	135351601	cggccccacgcaccaggguaaga	mml-mir-874-3p	135351616	135351637	cugcccuggcccgagggaccga
	yes	yes	ENSMMUT00000049183	mml-mir-875	CM002985.3	-	98198716	98198791	uuagugguacuauaccucaguuuuaucagguguuccuaaaaucaccuggaaauacugagguugugucucacugaac	76	mml-mir-875-5p	98198726	98198747	uauaccucaguuuuaucaggug	mml-mir-875-3p	98198760	98198780	ccuggaaauacugagguugug
yes	yes	yes	ENSMMUT00000049132	mml-mir-876	CM002986.2	+	54985288	54985368	ugaagugcuguggauuucuuugugaaucaccauaucuaagcuaaugugguggugguuuacaaaguaauucauagugcuuca	81	mml-mir-876-5p	54985298	54985319	uggauuucuuugugaaucacca	mml-mir-876-3p	54985337	54985358	uggugguuuacaaaguaauuca
yes	yes	yes	ENSMMUT00000049239	mml-mir-877	CM002983.2	+	31285374	31285476	gcuagagaagguagaggagauggcgcaggggacacgggcuaagacucggggguuccugggacccucagacauguguccucuucucccuccucccagguguaug	103	mml-mir-877-5p	31285384	31285403	guagaggagauggcgcaggg	mml-mir-877-3p	31285450	31285468	ccucuucucccuccuccca
yes	yes	yes	ENSMMUT00000049247	mml-mir-885	CM002980.3	+	55917795	55917868	ccgcacucucuccauuacacuacccugccucuucuccaugagaggcagcgggguguaguggauagagcacgggu	74	mml-mir-885-5p	55917805	55917826	uccauuacacuacccugccucu	mml-mir-885-3p	55917837	55917858	aggcagcgggguguaguggaua
yes	yes	yes	ENSMMUT00000049226	mml-mir-887	CM002982.3	+	16421367	16421444	ugcagauccuugggagcccuguuagacucuggauuuuacacuuggagugaacgggcgccaucccgaggcuuugcacag	78	mml-mir-887-5p	NA	NA	NA	mml-mir-887-3p	16421413	16421434	gugaacgggcgccaucccgagg
	yes	yes	ENSMMUT00000049213	mml-mir-888	CM002997.3	-	139702255	139702331	ggcagugcccuacucaaaaagcugucagucacuuauguuacaugugacugacaccucuuuagaugaaggaaggcuca	77	mml-mir-888-5p	139702265	139702285	uacucaaaaagcugucaguca	mml-mir-888-3p	NA	NA	NA
yes	yes	yes	ENSMMUT00000049179	mml-mir-889	CM002991.3	+	163381893	163381971	gugcuuaaagaauggcuguccguaguauggucucuauauuuaugaugauuaauaucggacaaccauuguuuuaguaucc	79	mml-mir-889-5p	163381903	163381924	aauggcuguccguaguaugguc	mml-mir-889-3p	163381941	163381961	uuaauaucggacaaccauugu
	yes	yes	ENSMMUT00000052741	mml-mir-890	CM002997.3	-	139701729	139701800	ugcccuacuuggaaaggcaccaguuacuuagauuacacguaacuguucccuuucugaguagaguaaggcuua	72	mml-mir-890-5p	139701734	139701753	uacuuggaaaggcaccaguu	mml-mir-890-3p	139701769	139701790	aacuguucccuuucugaguaga
	yes	yes	ENSMMUT00000049064	mml-mir-891a	CM002997.3	-	139707844	139707922	ccuuaauccuugcaacuuaccugagucauugauucaguaaaacauucaauggcacauguuuguuguuagggucaaaaga	79	mml-mir-891a-5p	139707854	139707875	ugcaacuuaccugagucauuga	mml-mir-891a-3p	NA	NA	NA
yes	yes			mml-mir-891b	CM002997.3	-	139731797	139731908	aauguugucuccuucauccuugcaacgaacuugagccauugauucaguaaaacauucaauggcacaugcuuguuguuaggaucaaaagagauaauccaucuaaaggccucau	112	mml-mir-891b-5p	139731817	139731838	ugcaacgaacuugagccauuga	mml-mir-891b-3p	139731854	139731875	aauggcacaugcuuguuguuag
yes	yes	yes	ENSMMUT00000049245	mml-mir-892a	CM002997.3	-	139703810	139703884	gcagugcucuacuuagaaaggugccagucacuuacauuacaugucacuguguccuuucugcguagaguaaggcuc	75	mml-mir-892a-5p	NA	NA	NA	mml-mir-892a-3p	139703854	139703874	cacuguguccuuucugcguag
	yes	yes	ENSMMUT00000049087	mml-mir-892b	CM002997.3	-	139704339	139704415	ugcaaugcccuacucagaaaggugccauuuauguagauuauaugucacuggcuccuuucuggguagaguaaggcuca	77	mml-mir-892b-5p	NA	NA	NA	mml-mir-892b-3p	139704384	139704405	cacuggcuccuuucuggguaga
	yes	yes	ENSMMUT00000049130	mml-mir-892c	CM002997.3	-	139700246	139700302	uauucagaaaggugccagucacuuagauuacaugucacuguuuccuuucugagugga	57	mml-mir-892c-5p	139700246	139700267	uauucagaaaggugccagucac	mml-mir-892c-3p	139700281	139700302	cacuguuuccuuucugagugga
	yes	yes	ENSMMUT00000049162	mml-mir-920	CM002989.3	+	25128633	25128707	guaguuguucugcagaagaccuggauguggaagagcuaagacacacuccaggggagcuguagaagcgguaacacg	75	mml-mir-920-5p	NA	NA	NA	mml-mir-920-3p	25128683	25128702	ggggagcuguagaagcggua
	yes	yes	ENSMMUT00000063533	mml-mir-922	CM002980.3	-	204324678	204324757	uggcguucucucucucccuguccuggacuggggucagaccgugccccgaggagaagcagcagagaaugagacuacgucgu	80	mml-mir-922-5p	NA	NA	NA	mml-mir-922-3p	204324733	204324755	gcagcagagaaugagacuacguc
	yes			mml-mir-922-2	JSUE03303087.1	-	210	289	uggcguucucucucucccuguccuggacuggggucagaccgugccccgaggagaagcagcagagaaugagacuacgucgu	80	mml-mir-922-2-5p	NA	NA	NA	mml-mir-922-2-3p	265	287	gcagcagagaaugagacuacguc
	yes			mml-mir-924	CM002995.2	-	28433712	28433760	aauagagucuuguguugucuugcuuaaaggccauccaaccuagagucua	49	mml-mir-924-5p	28433715	28433734	agagucuuguguugucuugc	mml-mir-924-3p	NA	NA	NA
	yes	yes	ENSMMUT00000049202	mml-mir-933	CM002979.2	-	62201615	62201690	cuugggucaguucagagguccucggggcgcgcgucgagucagccgugugcgcagggagaccucucccacccacagu	76	mml-mir-933-5p	NA	NA	NA	mml-mir-933-3p	62201660	62201681	ugugcgcagggagaccucuccc
yes	yes	yes	ENSMMUT00000049256	mml-mir-934	CM002997.3	+	130362488	130362570	aggaauaaggcuucugucuacuacuggagacacugauaguguaaaacccagagucuucgguaauggacgggagccuuauuucu	83	mml-mir-934-5p	130362502	130362522	ugucuacuacuggagacacug	mml-mir-934-3p	130362538	130362559	gagucuucgguaauggacggga
	yes	yes	ENSMMUT00000049199	mml-mir-936	CM002987.3	-	99866166	99866263	ucaaggacacugggacaggagagggaggaaucgcagaaaucacuccaggagcaacugagagaccuugcuucuacuuuaccagguccugcuggcccaga	98	mml-mir-936-5p	99866180	99866201	acaggagagggaggaaucgcag	mml-mir-936-3p	NA	NA	NA
yes	yes	yes	ENSMMUT00000049704	mml-mir-937	CM002985.3	-	143078395	143078480	agcacugcccccggugagucaggguggggcuggcccccugcuucgcgcccauccgcacucugacucuccaccugccugcaggagcu	86	mml-mir-937-5p	NA	NA	NA	mml-mir-937-3p	143078445	143078466	auccgcacucugacucuccacc
	yes			mml-mir-938	CM002987.3	-	29728709	29728783	gaaaguguaccaugugcacuuaaagaugaagccggugcaccuucaugaacugugguacaccuuuaagaacuuggu	75	mml-mir-938-5p	29728723	29728744	ugcacuuaaagaugaagccggu	mml-mir-938-3p	NA	NA	NA
yes	yes	yes	ENSMMUT00000049115	mml-mir-939	CM002985.3	-	143638752	143638834	ugugggcagggcccuggggagcugaggcucuggggguggccggggcugaccccugggccucugcuccccagugucugaccgug	83	mml-mir-939-5p	143638766	143638789	uggggagcugaggcucugggggug	mml-mir-939-3p	NA	NA	NA
	yes	yes	ENSMMUT00000049180	mml-mir-940	CM002993.2	+	2299673	2299766	guggggugugggcccggccccaggagcggggccugggcagccccguguguugaggaaggaaggcagggcccccgcuccccgggccugaccccac	94	mml-mir-940-5p	NA	NA	NA	mml-mir-940-3p	2299732	2299752	aaggcagggcccccgcucccc
yes	yes	yes	ENSMMUT00000049151	mml-mir-942	CM002977.3	+	118171542	118171627	auuaagagaguaccuucucuguuuuggccauguguguacucacagccccucacacguggccgaaacagagaagguacuuuccuaau	86	mml-mir-942-5p	118171555	118171575	cuucucuguuuuggccaugug	mml-mir-942-3p	118171594	118171615	cacguggccgaaacagagaagg
yes	yes	yes	ENSMMUT00000049099	mml-mir-944	CM002980.3	+	196551547	196551634	guuccagacacaucucaucugauauacaauauuuucuuaaauuguaaaaagagaaauuauuguauaucagaugagaugugucuggggu	88	mml-mir-944-5p	NA	NA	NA	mml-mir-944-3p	196551600	196551621	aaauuauuguauaucagaugag
yes	yes	yes	ENSMMUT00000049305	mml-mir-1179	CM002991.3	+	66597137	66597247	cuuauuggcuggaaaggaagaagcauucuuucauugguugguguguauugccuugucaaccaauaagaggaugccauuuauccuuuucugacuagcugagugagcagggug	111	mml-mir-1179-5p	66597157	66597177	aagcauucuuucauugguugg	mml-mir-1179-3p	NA	NA	NA
yes	yes	yes	ENSMMUT00000049539	mml-mir-1180	CM002994.2	-	19142309	19142364	ggacccacccggccgggaauagugcuccugguuguuuccggcucgcgugggugugu	56	mml-mir-1180-5p	19142309	19142329	ggacccacccggccgggaaua	mml-mir-1180-3p	19142343	19142364	uuuccggcucgcgugggugugu
yes	yes	yes	ENSMMUT00000049663	mml-mir-1185-1	CM002991.3	+	163378194	163378303	ccgcucuuugguacuugaagagaggauacccuuuguauguucacuugauuaauggugaauauacagggggagacucuuauuugcguaucaaacucugucggggaaggcgc	110	mml-mir-1185-1-5p	163378214	163378234	agaggauacccuuuguauguu	mml-mir-1185-1-3p	163378253	163378272	uauacagggggagacucuua
yes	yes	yes	ENSMMUT00000049589	mml-mir-1185-2	CM002991.3	+	163376994	163377052	agaggauacccuuuguauguucacuugauuaauggugaauauacagggggagacucuua	59	mml-mir-1185-2-5p	163376994	163377014	agaggauacccuuuguauguu	mml-mir-1185-2-3p	163377033	163377052	uauacagggggagacucuua
yes		yes	ENSMMUT00000049442	mml-miR-1197	CM002991.3	+	163360890	163361039	uugaccaugguguguacgcuuuauuuauaacguaggacacauggucuacuucuucucaauaucacaucucgccucggaagacuuccaggaggugauaucagcuuugaggaagagccacuguccuggugucaguacggcugcugcuuggua	150	mml-miR-1197-5p	163360922	163360942	uaggacacauggucuacuucu	mml-miR-1197-3p	163360999	163361016	aagagccacuguccuggu
yes	yes	yes	ENSMMUT00000049544	mml-mir-1224	CM002980.3	-	108810737	108810821	gugaggacucgggagguggaggguggcgccgccggggccaggcgcugucuaagcucgcuucuccccccaccuccucucuccucag	85	mml-mir-1224-5p	108810737	108810755	gugaggacucgggaggugg	mml-mir-1224-3p	108810801	108810821	ccccaccuccucucuccucag
	yes	yes	ENSMMUT00000049475	mml-mir-1225	CM002993.2	-	2107946	2108035	guggguacggcccagugggggggagagggacacgcccugggcucugcccagggugcagccggacugacugagccccugugccgcccccag	90	mml-mir-1225-5p	2107946	2107966	guggguacggcccaguggggg	mml-mir-1225-3p	2108013	2108035	cugagccccugugccgcccccag
yes	yes	yes	ENSMMUT00000049742	mml-mir-1226	CM002980.3	-	94650349	94650423	gugagggcaugcaggccuggauggggcagcugggaugguccaaaaggguggccucaccagcccuguguucccuag	75	mml-mir-1226-5p	NA	NA	NA	mml-mir-1226-3p	94650402	94650423	ucaccagcccuguguucccuag
yes	yes	yes	ENSMMUT00000049349	mml-mir-1227	CM002996.3	-	2118507	2118594	guggggccaggcgguggugggcaccgcuggggugggcacagcagccaugcagagcaggcagcugaccccgugccauccucuuccccag	88	mml-mir-1227-5p	2118507	2118526	guggggccaggcgguggugg	mml-mir-1227-3p	NA	NA	NA
yes		yes	ENSMMUT00000049303	mml-miR-1228	CM002989.3	+	55978710	55978809	agcgcgacugcccaggugggcaggggcagguguguggugggcgguggccugcggugagcacggccuucacaccugccucgccccccaggugugaaacgcc	100	mml-miR-1228-5p	55978726	55978751	ugggcaggggcagguguguggugggc	mml-miR-1228-3p	55978774	55978795	cuucacaccugccucgcccccc
	yes			mml-mir-1230	CM002985.3	+	143249103	143249175	gugggugggggcaucucggaggaggugggggguguggcgcccagcggaugacuccgagcggcuccuuucccag	73	mml-mir-1230-5p	143249103	143249122	gugggugggggcaucucgga	mml-mir-1230-3p	NA	NA	NA
	yes			mml-mir-1232	CM002986.2	+	1281592	1281664	gugggguggcggcgacauggcgggggcggcgggcccugcggaggcugugcgccugaccccgaccaccccgcag	73	mml-mir-1232-5p	NA	NA	NA	mml-mir-1232-3p	1281644	1281664	cugaccccgaccaccccgcag
	yes	yes	ENSMMUT00000070969	mml-mir-1233	CM002991.3	-	8428808	8428889	gugagugggaggccagggcagggcagggggagcugcagggccuucggaggggccccagcgucugagcccuguccucccgcag	82	mml-mir-1233-5p	NA	NA	NA	mml-mir-1233-3p	8428870	8428889	ugagcccuguccucccgcag
		yes	ENSMMUT00000049494	mml-mir-1233-1	CM002986.2	+	10623746	10623827	gugagugggaggccagggcacggcaggaggagcugcacaguggucggagggaacccaguaucugagcccuguccuuccgcag	82	mml-mir-1233-1-5p	10623774	10623793	ggagcugcacaguggucgga	mml-mir-1233-1-3p	10623808	10623827	ugagcccuguccuuccgcag
		yes	ENSMMUT00000049694	mml-mir-1233-2	CM002987.3	-	30483612	30483692	gugagugagaggccagggaaggcagggggagcugcaaggccauuggaggggccccagcaucugagcccuguccuccugcag	81	mml-mir-1233-2-5p	30483622	30483641	ggccagggaaggcaggggga	mml-mir-1233-2-3p	30483673	30483692	ugagcccuguccuccugcag
		yes	ENSMMUT00000061549	mml-mir-1233-3	CM002991.3	+	78533961	78534042	gugagugggaggccagggcaaggcagggggagcugcagggccgucagaggggccccagcgucugagcccuguccucgcgcag	82	mml-mir-1233-3-5p	78533964	78533983	agugggaggccagggcaagg	mml-mir-1233-3-3p	78534023	78534042	ugagcccuguccucgcgcag
		yes	ENSMMUT00000049496	mml-miR-1233-4	CM002989.3	-	100062959	100063040	gggagugggaagccagggcacagcaaggagagcugcacaucggucagaggggccccagcgucugagcccuguccuccuguag	82	mml-miR-1233-4-5p	NA	NA	NA	mml-miR-1233-4-3p	100063021	100063040	ugagcccuguccuccuguag
		yes	ENSMMUT00000072697	mml-miR-1233-5	CM002991.3	-	8225908	8225989	gugagugggaggccagggcagggcagggggagcugcagggccuucggaggggccccagcgucugagcccuguccucccacag	82	mml-miR-1233-5-5p	8225919	8225938	gccagggcagggcaggggga	mml-miR-1233-5-3p	8225970	8225989	ugagcccuguccucccacag
		yes	ENSMMUT00000074198	mml-miR-1233-6	CM002991.3	-	80533310	80533391	gugagcaggaggccagggcauagcagggggagcugcagggccaucagaggggucucagcgucugagcccuguccucccacag	82	mml-miR-1233-6-5p	80533318	80533337	gaggccagggcauagcaggg	mml-miR-1233-6-3p	80533372	80533391	ugagcccuguccucccacag
	yes	yes	ENSMMUT00000049491	mml-mir-1234	CM002985.3	-	143644566	143644633	ugggguggggcagggauggcuugggccugcccagucggccugaccacccaccccacaggcacccagga	68	mml-mir-1234-5p	NA	NA	NA	mml-mir-1234-3p	143644600	143644621	ucggccugaccacccaccccac
	yes			mml-mir-1235	CM002985.3	-	143188621	143188694	gugggccugggucgguggggacggggcggcugggcgugcccugcggccgcugcucuaaccgcaccgucccccag	74	mml-mir-1235-5p	NA	NA	NA	mml-mir-1235-3p	143188674	143188694	ucuaaccgcaccgucccccag
	yes			mml-mir-1239	CM002996.3	+	18136949	18137053	gugggugggcaggugggugggaagcccugggacgcugccuccucucuccuggggccucucucgggcugggggcuggucucaguuuccccauucugccuggccuag	105	mml-mir-1239-5p	NA	NA	NA	mml-mir-1239-3p	18137032	18137053	uuccccauucugccuggccuag
	yes			mml-mir-1240	CM002979.2	-	101351871	101351953	gugggccagggccgcgggggggagcaagccaucuagcauuccugggaaacgcuuacaucucaccaugacccugaucccacuag	83	mml-mir-1240-5p	NA	NA	NA	mml-mir-1240-3p	101351930	101351951	ucaccaugacccugaucccacu
	yes			mml-mir-1241	CM002993.2	+	52236573	52236656	gugagggggcuggcauggcgaggaggcgccagagaagccauaguguggggaugggcugcacacucaccucucugugccuuccag	84	mml-mir-1241-5p	NA	NA	NA	mml-mir-1241-3p	52236635	52236656	cucaccucucugugccuuccag
yes	yes			mml-mir-1243	CM002981.2	+	112060510	112060620	cugacagauugguugacuguguacucuuauauuuuauuccuguaacugggccaguuucugcccuuaacuaaaacuggaucaauuauaggagugaaauaaaaguccaucucc	111	mml-mir-1243-5p	112060580	112060600	aaacuggaucaauuauaggag	mml-mir-1243-3p	112060547	112060567	uccuguaacugggccaguuuc
		yes	ENSMMUT00000077362	mml-miR-1243-1	CM002992.3	+	61825665	61825752	uaagcugagugcauugugauuuccaauaauugaggcagugguucuaaaagcugucuacauuaaugaaaagagcaauguggccagcuug	88	mml-miR-1243-1-5p	61825684	61825703	uuuccaauaauugaggcagu	mml-miR-1243-1-3p	NA	NA	NA
yes				mml-miR-1244a	CM002988.2	+	17798299	17798404	acaacagcagaaaaacaaucuuauuccgagcauuccaguaacuuuuuuguguauguacuuagcuauacuauaaguaguugguuuguaugagaugguuaaaaaggcc	106	mml-miR-1244a-5p	17798316	17798338	aucuuauuccgagcauuccagua	mml-miR-1244a-3p	17798371	17798393	aguaguugguuuguaugagaugg
yes				mml-miR-1244b	CM002982.3	+	37471518	37471624	caaucuuauuccgaacauuccaguaacuuuuuuguguauguacuuagcuguacuauaaguaguugguuuguaugagaugguuaaaaaggccaaagauaaaagguuuc	107	mml-miR-1244b-5p	NA	NA	NA	mml-miR-1244b-3p	37471575	37471597	aguaguugguuuguaugagaugg
yes	yes			mml-mir-1245	CM002979.2	-	76385058	76385114	guaggccuuuagaucaucuaaagaguauucaacauuagaugagcuaaaggccuauac	57	mml-mir-1245-5p	76385095	76385114	gaugagcuaaaggccuauac	mml-mir-1245-3p	76385058	76385077	guaggccuuuagaucaucua
yes		yes	ENSMMUT00000049696	mml-miR-1246	CM002979.2	-	63618038	63618236	uuguaaugugaaccauugaugagguaggacuggguagagauaagagacauugcauuuggaggcagucagauuugcauccuugaauggauuuuuggagcaggaguggacaccugacccaaaggaaaucaauccauaggcuagcaaucaaccucuuuuuuguucuuguagcguuugaucguuaucuaguuuugcuaaaucc	199	mml-miR-1246-5p	63618120	63618138	aauggauuuuuggagcagg	mml-miR-1246-3p	63618150	63618173	gacccaaaggaaaucaauccauag
yes	yes	yes	ENSMMUT00000049405	mml-mir-1247	CM002991.3	-	163899899	163899956	acccgucccguucguccccggacguugcucucuaccccgggaacgucgagacuggagc	58	mml-mir-1247-5p	163899936	163899956	cgggaacgucgagacuggagc	mml-mir-1247-3p	163899899	163899920	acccgucccguucguccccgga
	yes	yes	ENSMMUT00000049824	mml-mir-1249	CM002992.3	-	87337484	87337595	cauccugcuccucagauucuuguuggcauggggaggagggaggagaugggccaaguucccucuggcuggaacgcccuucccccccuucuucaccuggcgaacuccuacucgu	112	mml-mir-1249-5p	NA	NA	NA	mml-mir-1249-3p	87337554	87337575	acgcccuucccccccuucuuca
	yes	yes	ENSMMUT00000049621	mml-mir-1250	CM002994.2	-	74994245	74994354	ucucgcuggccuggaaggugacggugcugaauguggccuuuuugccuuuuccaaaggccacauuuuccagcccauucacccuuccagagcccucugagguggccuaggcc	110	mml-mir-1250-5p	74994265	74994284	acggugcugaauguggccuu	mml-mir-1250-3p	NA	NA	NA
	yes	yes	ENSMMUT00000049698	mml-mir-1251	CM002989.3	+	97343443	97343501	acucuagcugccaaaggcgcuucuccuucugaacagagcgcuuugcucagccaguguag	59	mml-mir-1251-5p	97343481	97343501	cgcuuugcucagccaguguag	mml-mir-1251-3p	97343443	97343463	acucuagcugccaaaggcgcu
	yes			mml-mir-1255a	CM002981.2	-	100144124	100144227	nnnnnnngaguugcuucucaaggaugagcaaaggaaguaguuuuuuuagauuccaaagaaacuaccuacuuugcucaucuuugagaagcaacucuuuauccauuaaaauuu	111	mml-mir-1255a-5p	100144185	100144206	cuaccuacuuugcucaucuuug	mml-mir-1255a-3p	100144144	100144164	aggaugagcaaaggaaguagu
yes	yes	yes	ENSMMUT00000049449	mml-mir-1255b	CM002977.3	-	199689428	199689539	cuucacuaggaguugcuucuuacggauaagcaaagaaagugguuugagccucaggaaaccacuuucuuugcucaucuguaaggagcaacuccuuaucuguucaaguuuuauc	112	mml-mir-1255b-5p	199689448	199689469	uacggauaagcaaagaaagugg	mml-mir-1255b-3p	NA	NA	NA
yes				mml-miR-1256c	JSUE03108077.1	+	728	879	ucaccaacuauauuagcaccuaaaagucgagucagccuguugaagcuuugaagcuuugaugcuaggcauugacuucucacuagcuaugaaaguccuaguuagagagaagucaaugcaugacaucuuguuucaauagauggcuguuucaucua	152	mml-miR-1256c-5p	791	812	aggcauugacuucucacuagcu	mml-miR-1256c-3p	826	846	uuagagagaagucaaugcaug
yes	yes			mml-mir-1258	CM002979.2	+	66923498	66923607	uacccuggggaacugaggagucugcuccuguggcuuccaccaccuaauccuaacuccagggacucgcaggaguuaggauuaggucguggaagccagaggcgccugggcgc	110	mml-mir-1258-5p	NA	NA	NA	mml-mir-1258-3p	66923568	66923588	aguuaggauuaggucguggaa
		yes	ENSMMUT00000049686	mml-mir-1258-1	CM002979.2	-	66923523	66923595	cucuggcuuccacgaccuaauccuaacuccugcgagucccuggaguuaggauuaggugguggaagccacagga	73	mml-mir-1258-1-5p	66923532	66923552	ccacgaccuaauccuaacucc	mml-mir-1258-1-3p	66923566	66923586	aguuaggauuaggugguggaa
yes	yes	yes	ENSMMUT00000073144	mml-mir-1260b	CM002988.2	+	88962278	88962385	guggcugcugcucuccguuuaucccaccacugccaccauuauugcuacuguucagcaggugcugcugguggugauggugauagucuggugggggcgguggggcugcug	108	mml-mir-1260b-5p	88962298	88962315	aucccaccacugccacca	mml-mir-1260b-3p	NA	NA	NA
		yes	ENSMMUT00000056567	mml-miR-1260b-1	CM002996.3	+	49321189	49321279	ggcgggggcgcgggcggcaguggcgggagcggccccucggccauccuccgucugcccaguuaccgcuuccgcuaccgccgccgcucccgcu	91	mml-miR-1260b-1-5p	49321200	49321217	gggcggcaguggcgggag	mml-miR-1260b-1-3p	49321256	49321273	uccgcuaccgccgccgcu
yes	yes	yes	ENSMMUT00000049452	mml-mir-1262	CM002977.3	-	67962083	67962194	uugaccauaaaaaauaaauucugugaauuucauccuucuauaaauucauccaucacauuaucuagaauggugaugggugaauuuguagaaggaugagagucaaagaauccuu	112	mml-mir-1262-5p	67962118	67962139	uucuauaaauucauccaucaca	mml-mir-1262-3p	67962153	67962174	ugaugggugaauuuguagaagg
yes				mml-miR-1264	CM002997.3	+	108527705	108527806	uuguguuucuucaugccuggcauauagcagguccucaauaaguauuuguugaaagaauaaauaaaccaacaagucuuauuugagcaccuguuauguggagga	102	mml-miR-1264-5p	108527733	108527754	agguccucaauaaguauuuguu	mml-miR-1264-3p	108527774	108527795	caagucuuauuugagcaccugu
yes		yes	ENSMMUT00000049636	mml-miR-1266	CM002991.3	-	28712127	28712226	ccuuauuugauacuagacagauagugucccucagggcuguagaacaggacugggauuaccgaagcccuguucuaugcccugagggacacugagcauguca	100	mml-miR-1266-5p	28712155	28712177	ccucagggcuguagaacaggacu	mml-miR-1266-3p	28712191	28712212	cccuguucuaugcccugaggga
yes	yes	yes	ENSMMUT00000049527	mml-mir-1271	CM002982.3	+	174823229	174823337	ccccagcacccagaucagugcuuggcaccuagcaagcacucaguaaauacuuguugagugccugcuaugugccgggcauugugcugagggcuuuguggggauccagagg	109	mml-mir-1271-5p	174823249	174823270	cuuggcaccuagcaagcacuca	mml-mir-1271-3p	174823286	174823306	gugccugcuaugugccgggca
yes				mml-miR-1273a	CM002977.3	+	7774125	7774274	ccagcuauucgggaggcugaggcaggagaauugcuuguucccaggaggcagaggcugcggugagccaagacugcaccacugcacuccagccugggcgacaaagcaagacucugucucaaacaacaacaacaaauagugguucuuaacugu	150	mml-miR-1273a-5p	7774165	7774182	ccaggaggcagaggcugc	mml-miR-1273a-3p	7774199	7774218	accacugcacuccagccugg
yes				mml-miR-1273af	CM002979.2	+	52702798	52702882	gugugaaccugggaggcggagcuugcagugagccgagaucgccccauugcacuccagcaagggcgacaaagcaagacuccgucuc	85	mml-miR-1273af-5p	52702813	52702831	gcggagcuugcagugagcc	mml-miR-1273af-3p	52702869	52702887	caagacuccgucucaaaaa
yes				mml-miR-1273ah	CM002986.2	+	10475017	10475130	ccacugcacuccagccugggcgacaaagcaagacucccucuuaaaaugaauaaauaaaucauguuuauuuuuauuuuuguagagcugggggucucacuuuguugcccaggcugg	114	mml-miR-1273ah-5p	10475032	10475053	cugggcgacaaagcaagacucc	mml-miR-1273ah-3p	10475108	10475126	ucucacuuuguugcccagg
yes				mml-miR-1273b	CM002996.3	+	43040259	43040357	uacuaaaaauacaaaaauuagccgggcgugguggcgggcgccuguaguccuagcuacucaggaggcugaggcaggagaaucgcuugaacccgggaggca	99	mml-miR-1273b-5p	43040294	43040319	gggcgccuguaguccuagcuacucag	mml-miR-1273b-3p	43040326	43040349	gaggcaggagaaucgcuugaaccc
yes				mml-miR-1273e	KQ738164.1	-	24154	24269	cagcuacuugggaggcugaggcaggagaaucgcuugaaccugggagguggaaauugcgaugagccgagaucgugccacugcacuccagccugggugacacagugagacuccgucuc	116	mml-miR-1273e-5p	24171	24193	gaggcaggagaaucgcuugaacc	mml-miR-1273e-3p	24246	24269	ggugacacagugagacuccgucuc
yes				mml-miR-1273k	CM002979.2	-	21208168	21208269	gcugggugugguguguaccuguagucccagcuacuugggaagcuaaagugaaaacacugcuugagcccaggugguugaggcugcaguaagucaugauugugc	102	mml-miR-1273k-5p	21208185	21208205	ccuguagucccagcuacuugg	mml-miR-1273k-3p	21208237	21208258	ggugguugaggcugcaguaagu
yes	yes			mml-mir-1277	CM002997.3	+	112132461	112132568	gcagaaaugcaguauccauuucuaaccucccaaauauauauauauauguacguauguguauauaaauguauacguagauauauauguauuuuugguggguuuaauuuu	108	mml-mir-1277-5p	NA	NA	NA	mml-mir-1277-3p	112132531	112132551	uacguagauauauauguauuu
	yes			mml-mir-1283	CM002996.3	+	49032979	49033088	gaacaucccaggcugugacucuacaaaggaaagcacuuucuguugucgaaagaaaagaaagcgcuucccuuuugagaauuacgguuugagaaaagcaguguugaaguuga	110	mml-mir-1283-5p	49032999	49033018	cuacaaaggaaagcacuuuc	mml-mir-1283-3p	NA	NA	NA
	yes	yes	ENSMMUT00000049426	mml-mir-1284	CM002980.3	+	70436966	70437075	uauaagccaguuuaauguuuucuguacagacccuggcuuuucuuaaauuuuauauauuggaaagcccauguuuguauuggaaacugcugguuucuuucauauugaaaauc	110	mml-mir-1284-5p	70436986	70437005	ucuguacagacccuggcuuu	mml-mir-1284-3p	NA	NA	NA
yes		yes	ENSMMUT00000049313	mml-miR-1289	CM002992.3	+	28671284	28671386	auuaaaaacaaaacugguaaaugcagacucuuggauuccacccccagagaauccguaaaccggggguggaguccaggaaucugcauuuuagaaaguacccagg	103	mml-miR-1289-5p	28671305	28671326	ugcagacucuuggauuccaccc	mml-miR-1289-3p	28671350	28671372	uggaguccaggaaucugcauuuu
	yes	yes	ENSMMUT00000049626	mml-mir-1296	CM002987.3	+	69347312	69347423	gaaucaccuaccuaacuggguuagggcccuggcuccaucuccuuuaggaaaaccuucuguggggaguggggcuucgacccuaacccaggugggcuguaacacugcuguauuu	112	mml-mir-1296-5p	69347332	69347354	uuagggcccuggcuccaucuccu	mml-mir-1296-3p	69347375	69347396	gaguggggcuucgacccuaacc
yes	yes	yes	ENSMMUT00000049260	mml-mir-1298	CM002997.3	+	108589563	108589672	gagagacgaggaguuaagaguucauucggcuguccagauguauccaaguauccucuguuauuuggcaauaaauacaucugggcaacugacugaacuuuucgcuuuucaug	110	mml-mir-1298-5p	108589583	108589604	uucauucggcuguccagaugua	mml-mir-1298-3p	108589637	108589658	caucugggcaacugacugaacu
yes				mml-miR-1303t	CM002980.3	-	92628685	92628834	ggcuggagugcaauggcaugaucuuggcucacugcaaccuccaucuccuggguucaagcacuucuccuggauuauaggcgugccacugugccuagcuaauuuuuguauuuuuuaguagagacaggguuuugcuauguuggcauggcuggu	150	mml-miR-1303t-5p	92628699	92628718	ggcaugaucuuggcucacug	mml-miR-1303t-3p	92628800	92628819	uagagacaggguuuugcuau
yes	yes	yes	ENSMMUT00000049348	mml-mir-1304	CM002988.2	-	86377137	86377248	uaaucccuugagcccagugguucgaggcuacaaugagaugugauccugccacaucucacuguagccucaaacccuugggcucaagcgauucagcaagaaucacacgauuuuc	112	mml-mir-1304-5p	86377157	86377178	uucgaggcuacaaugagaugug	mml-mir-1304-3p	NA	NA	NA
yes				mml-miR-1304d	CM002988.2	+	86377154	86377255	ugcugaaucgcuugagcccgaggguuugaggcuacagugagauguggcaggaucacaucucauuguagccucgaaccacugggcucaagggauuauccugcc	102	mml-miR-1304d-5p	86377176	86377197	gguuugaggcuacagugagaug	mml-miR-1304d-3p	86377211	86377233	ucucauuguagccucgaaccacu
	yes	yes	ENSMMUT00000049376	mml-mir-1306	CM002992.3	+	61825991	61826048	ccaccuccccugcaaacguccaguggugcagagguaauggacguuggcucugguggug	58	mml-mir-1306-5p	61825991	61826011	ccaccuccccugcaaacgucc	mml-mir-1306-3p	61826031	61826048	acguuggcucugguggug
yes		yes	ENSMMUT00000049800	mml-miR-1307	CM002987.3	-	99205100	99205304	aaugacucccucacagauaucucccucuuccauuucaucaagacccagcugagucacugucacugccuaccaaucucgaccggaccucgaccggcucgucuguguugccaaucgacucggcguggcgucggucgugguagauaggcggucaugcauacgaauuuucagcucuuguucuggugaccuuucgaauauaucuugucua	205	mml-miR-1307-5p	99205175	99205198	ucgaccggaccucgaccggcucgu	mml-miR-1307-3p	99205214	99205236	acucggcguggcgucggucgugg
	yes	yes	ENSMMUT00000049723	mml-mir-1323	CM002996.3	+	49019624	49019731	ugacauucagacugauguccucaaaacugaggggcauuuucugugauuugaaaggaaagugcacccaguuuuggggaugucaauugugaauacucaucauaacccauu	108	mml-mir-1323-5p	49019644	49019664	ucaaaacugaggggcauuuuc	mml-mir-1323-3p	49019679	49019699	aaagugcacccaguuuugggg
yes		yes	ENSMMUT00000049897	mml-miR-1468	CM002997.3	-	58248380	58248481	cuaaagaggcgggcgguuucuccguuugccuguuuugcugauguacauucaacucauucucagcaaaauaagcaaauggaaaauuuguccaucaacaagcua	102	mml-miR-1468-5p	58248399	58248419	cuccguuugccuguuuugcug	mml-miR-1468-3p	58248442	58248462	gcaaaauaagcaaauggaaaa
yes				mml-miR-1543	CM002982.3	+	137006976	137007078	aguaccuuugggcaguguuuugcaccucugagaguggaaugacuccuccuguggaguugguccuagucugggugcaaacaauuuuuuucuguuagaaaaagga	103	mml-miR-1543-5p	137006994	137007019	uuugcaccucugagaguggaaugacu	mml-miR-1543-3p	137007032	137007054	uugguccuagucugggugcaaac
yes				mml-miR-1587ab	CM002992.3	+	88468809	88468957	gccuucaaccaccugaaucaucagcugggcugggcugggcugggcucgaccaucggaaucaccagcuguuuuccaggggacacaugggugguccuagcacuaugguuggguccuagaucccaggccugagccagugaccaaguuccaaa	149	mml-miR-1587ab-5p	88468833	88468852	cugggcugggcugggcuggg	mml-miR-1587ab-3p	88468917	88468940	gguccuagaucccaggccugagcc
yes				mml-miR-1587ad	CM002978.2	+	107634104	107634202	gcagcgcaguggcugggcugggcugggcugggcugugcgcgcgcgggccgcggaggacccugagccacgugcccggccgucucgcgcgugcuacugggg	99	mml-miR-1587ad-5p	107634116	107634135	cugggcugggcugggcuggg	mml-miR-1587ad-3p	107634177	107634195	cggccgucucgcgcgugcu
yes				mml-miR-1587ag	CM002994.2	-	25568606	25568755	ccuggggccugcccaaguuuaucccugaauaaacaggaggccgcagcagaccggaugggcuggugucgggagacuggcuggccuccgugcucagucacagaugccuccuuugugccuccccugccagggcugggcugggcugggcaaagg	150	mml-miR-1587ag-5p	25568612	25568632	gccugcccaaguuuaucccug	mml-miR-1587ag-3p	25568730	25568751	cagggcugggcugggcugggca
yes				mml-miR-1587ah	CM002994.2	-	75017245	75017344	gacaucccuugugaguguccagcuggcagaacucgcuucccucccugggcugggcugggcugggcugggcacccauguuugauugcaggguuggcugucg	100	mml-miR-1587ah-5p	75017258	75017280	aguguccagcuggcagaacucgc	mml-miR-1587ah-3p	75017294	75017315	cugggcugggcugggcugggca
yes				mml-miR-1587ai	CM002996.3	+	13039824	13039923	gccuggccuggcugcccaugggccugugccugugcuccugguuuucucagcucucuguauuccaaggcugggcugggcugggcugggcaggccuugggcc	100	mml-miR-1587ai-5p	13039834	13039859	gcugcccaugggccugugccugugcu	mml-miR-1587ai-3p	13039891	13039912	cugggcugggcugggcugggca
yes				mml-miR-1587h	JSUE03109637.1	+	2181	2279	gccuacaaaggccgcggagcgggaguugguccggagccgaguccaaagagguugacgugaggccgggcugggcugggcugggcccgcggccgcagccug	99	mml-miR-1587h-5p	2210	2233	uccggagccgaguccaaagagguu	mml-miR-1587h-3p	2243	2262	ccgggcugggcugggcuggg
yes				mml-miR-1587i	NW_001122011.1	-	12364	12512	gguugagcugggcugggcugagcugagcuggacugggaugggcugagcugagcugagcugaaccaggcuggggugagcuacgcugggcuggacugggcuaggcugagcugggcugggcugggcugagcugggcugggcugggcugggcu	149	mml-miR-1587i-5p	NA	NA	NA	mml-miR-1587i-3p	12491	12510	cugggcugggcugggcuggg
yes				mml-miR-1587j	KQ733225.1	+	47295	47443	acgcuggcccguggagccggcacgaggaucucugggcugggcugggcugggcuccucuguccacagcagagcguguccgaugauugagcugugcgggucuguggcuccccagccucgagucagcccucgguucuggucccgccucuguu	149	mml-miR-1587j-5p	47326	47345	cugggcugggcugggcuggg	mml-miR-1587j-3p	47403	47423	ccagccucgagucagcccucg
yes				mml-miR-1587k	CM002977.3	+	111456405	111456553	cuuccugagagaagcuacuuccugagcucagccuugcuucuguccucuggagagucagccccucagagagcauguugcccucucugaguauuugccaggaugggcugggcugggcugggcuggauggagggagcggagacaaugccugc	149	mml-miR-1587k-5p	111456429	111456447	agcucagccuugcuucugu	mml-miR-1587k-3p	111456505	111456523	ugggcugggcugggcuggg
yes				mml-miR-1587l	CM002980.3	+	91991985	91992133	cgccucggccgcaaguccagucccgggcccaccuccgcacuggagucuuaaagggccagcgggccuaggggcggagccagcagaggcgcugagccggggccgcgccugggcgaacggccggagagggcugggcugggcugggcccggga	149	mml-miR-1587l-5p	91991991	91992013	ggccgcaaguccagucccgggcc	mml-miR-1587l-3p	91992107	91992126	gagggcugggcugggcuggg
yes	yes	yes	ENSMMUT00000050178	mml-mir-1911	CM002997.3	+	108624040	108624098	ugaguaccgccaugucuguugggcauccacagucucccaccaggcauuguggucucugc	59	mml-mir-1911-5p	108624040	108624061	ugaguaccgccaugucuguugg	mml-mir-1911-3p	108624078	108624098	accaggcauuguggucucugc
yes				mml-miR-1946	CM002986.2	-	110974267	110974408	gcgugguggcgggcgccuguagucccagcuacucaggaggcugaggcaggagaauggcaugaacccgggaggcggagcuugcagugagccgagaucgugccacugcacuccagccugggcgacagagcgagacuccgucuca	142	mml-miR-1946-5p	110974331	110974355	ccgggaggcggagcuugcagugagc	mml-miR-1946-3p	110974367	110974386	cacugcacuccagccugggc
yes		yes	ENSMMUT00000052213	mml-miR-1976	CM002977.3	+	25385129	25385228	ugggcacggggguuggguaugcaaaggguggcagcaaggaaggcaggguuccugagguguguccuccugcccuccuugcuguagacuuuggccugagcaa	100	mml-miR-1976-5p	25385159	25385178	gcagcaaggaaggcaggguu	mml-miR-1976-3p	25385192	25385212	cuccugcccuccuugcuguag
yes		yes	ENSMMUT00000052425	mml-miR-2113	CM002983.2	+	96529230	96529380	caguauaccuuucacagaggcagauauuuucaaagcaaugugugacagguacagggacaaaucccguuaauaaguaagaggauuugugcuuggcucugucacaugccacuuugaaaaccuacccucaaacugucuauaaauuuucaugccc	151	mml-miR-2113-5p	96529273	96529293	gacagguacagggacaaaucc	mml-miR-2113-3p	96529311	96529331	auuugugcuuggcucugucac
yes	yes	yes	ENSMMUT00000052108	mml-mir-2114	CM002997.3	+	143880254	143880364	uggggccaaagacaagccucugccuucaugcuccuagucccuuccuugaagcggucggauaaucacaugacgagccucaagcaagggacuucaagcugguggcuuccagca	111	mml-mir-2114-5p	NA	NA	NA	mml-mir-2114-3p	143880324	143880345	cgagccucaagcaagggacuuc
yes		yes	ENSMMUT00000052148	mml-miR-2355	CM002979.2	-	88868761	88868963	aggagcugugaauuaugcauuggcucuuucagcuacauucacaugcauagaaaauaacauugucagacgugucauccccagauacaguggacaauaugcuauuauaauuguauggcauuguccuugcuguuuggagauaauacugcugacuuuauuccucucauacaugugaauguggcuguagggaguacgugacagcugug	203	mml-miR-2355-5p	88868836	88868859	ccccagauacaguggacaauaugc	mml-miR-2355-3p	88868877	88868898	auuguccuugcuguuuggagau
yes				mml-miR-2985	CM002981.2	+	157365690	157365791	gcaucgcaacaccuaaaggauccucauuaagguggguggaauaguauaacaauaugcuaaauguuguuauaguaucccaccuacccugauguaucuuuaaga	102	mml-miR-2985-5p	157365721	157365742	guggguggaauaguauaacaau	mml-miR-2985-3p	157365754	157365775	uguuauaguaucccaccuaccc
yes	yes			mml-mir-3059	CM002989.3	-	86053082	86053140	uuuccucucugccccauaggguguagcucuaacuacccucuagggaagagaagguuggg	59	mml-mir-3059-5p	86053082	86053103	uuuccucucugccccauagggu	mml-mir-3059-3p	86053120	86053140	ucuagggaagagaagguuggg
yes		yes	ENSMMUT00000062061	mml-miR-3064	CM002994.2	-	58120447	58120546	gucuaacuuuuuauuuuuggucuggcuguuguggugugcaaaacuccguacauugcuauuuugccacacugcaacaccuuacagauguggaagaugugaa	100	mml-miR-3064-5p	58120467	58120487	ucuggcuguuguggugugcaa	mml-miR-3064-3p	58120512	58120531	acacugcaacaccuuacaga
yes		yes	ENSMMUT00000038146	mml-miR-3065	CM002994.2	+	74986905	74987048	cuacccucuucaacaaaaucacugaugcuggagucaccugagucaucacucagcaccaggauauuguuggagaggacggccgugcggcaucuggggcugguggggccacauguccuucgccacuucuuccagcauguccccccg	144	mml-miR-3065-5p	74986914	74986934	ucaacaaaaucacugaugcug	mml-miR-3065-3p	74986954	74986976	ucagcaccaggauauuguuggag
yes		yes	ENSMMUT00000036672	mml-miR-3074a	CM002986.2	-	108904862	108904963	cuuuuugcucaagggcucgacuccuguuccugcugaacugagccaguguguaaaaugagaacugauaucagcucaguaggcaccggagggcggguccaaucg	102	mml-miR-3074a-5p	108904887	108904908	guuccugcugaacugagccagu	mml-miR-3074a-3p	108904924	108904949	ugauaucagcucaguaggcaccggag
yes				mml-miR-3074b	CM002996.3	+	13838815	13838966	cuccaagcaucagcccacgggcugcaggcuccaagggggcuugacuccuguuccugcugaacugagccagugugcacaaaccaacuguguuucagcucaguaggcacgggaggcagagcccagggaggccaggcagcaggauggcagacaga	152	mml-miR-3074b-5p	13838864	13838885	guuccugcugaacugagccagu	mml-miR-3074b-3p	13838900	13838923	uguguuucagcucaguaggcacgg
yes				mml-miR-3085	CM002987.3	-	93399317	93399417	ugguugccaacccuacucugggaaggugccauucugagggccaggaguuugauuaugugucacucuggcugcuauggcccccucccagggucugggcauca	101	mml-miR-3085-5p	93399340	93399369	aggugccauucugagggccaggaguuugau	mml-miR-3085-3p	93399380	93399400	ucuggcugcuauggcccccuc
yes				mml-miR-3120	CM002977.3	-	195417670	195417870	guagaugcuauggugugagggcugcuuucuuucaauggcugguugucauucaggcuggguugucaugugacugccugucugugccugcuguacaggugagcggauguucugcacagcaaguguagacaggcagacacaugacaacucuguccagccaggcccuugguuccuucagguuuccuuugcucauagacagauaca	201	mml-miR-3120-5p	195417743	195417763	ccugucugugccugcuguaca	mml-miR-3120-3p	195417781	195417801	cacagcaaguguagacaggca
yes	yes	yes	ENSMMUT00000065572	mml-mir-3122	CM002977.3	-	154448598	154448708	aaaaguuacugaccagcucuguugggacaagagaacggucuuguuuuggaaggaagaccgucguuuugucccaagagagcugguagcauguuucggaaaucugcaaguuuc	111	mml-mir-3122-5p	154448618	154448638	guugggacaagagaacggucu	mml-mir-3122-3p	NA	NA	NA
yes		yes	ENSMMUT00000072967	mml-miR-3132	CM002979.2	-	101673016	101673169	ucggcgcugccggcugaugaccacuguggugggauggguagagaaggagcucagaggacugugcgccuuauuuccccugagcccucccucucucuucccaccugaggcucuaggcuuccagauuccucuuguccauaaccccuuacucccaccc	154	mml-miR-3132-5p	101673050	101673073	uggguagagaaggagcucagagga	mml-miR-3132-3p	101673090	101673110	cccugagcccucccucucucu
yes		yes	ENSMMUT00000070180	mml-miR-3134	CM002980.3	-	172330360	172330508	uugaugauuucugagauuuuggugcaccggucaccugaguaauguacauuguauccaauguguagucuuuuaucccucacauggaguaaaauaugagggauaaaagacuacauauuggguacaauuuggggacucuuccgccugagucc	149	mml-miR-3134-5p	172330416	172330436	aauguguagucuuuuaucccu	mml-miR-3134-3p	172330457	172330475	ggauaaaagacuacauauu
yes	yes	yes	ENSMMUT00000057423	mml-mir-3140	CM002981.2	-	152405803	152405915	agccuaccauuuguguccucuugagguaccugaauuaccaaaagcuauguauucugaaguuauugaaaauaagagcuuuugggaauucagguaguucaggagugacuuuucua	113	mml-mir-3140-5p	NA	NA	NA	mml-mir-3140-3p	152405873	152405893	aagagcuuuugggaauucagg
yes	yes	yes	ENSMMUT00000072191	mml-mir-3145	CM002983.2	+	128858760	128858870	ugaaaggaaaaaauguauucauauaaggucaacuccaaacauucaaaacgcauuguugaauggaauuagguauuuugaguguuuggaauugaacuuguaugcacugauaca	111	mml-mir-3145-5p	128858790	128858811	aacuccaaacauucaaaacgca	mml-mir-3145-3p	128858830	128858851	uauuuugaguguuuggaauuga
	yes	yes	ENSMMUT00000060654	mml-mir-3146	CM002984.2	+	88490548	88490659	acagagauacacguuuucuuugcuaaguccuuucuuucuauccuaguauaacuugaagaauucaaauagucaugcuagaacagaaagaaugggaguuggcaagggaagaaga	112	mml-mir-3146-5p	NA	NA	NA	mml-mir-3146-3p	88490618	88490640	caugcuagaacagaaagaauggg
yes	yes	yes	ENSMMUT00000068453	mml-mir-3151	CM002985.3	+	101895986	101896093	uucauacagccuuuggggugacggguggcgcaaugggaucaggugccucaaagggcaucacaucugaucccacagccucacccaucaccccaaaggccuacugcuccu	108	mml-mir-3151-5p	101896006	101896027	acggguggcgcaaugggaucag	mml-mir-3151-3p	NA	NA	NA
yes	yes	yes	ENSMMUT00000064196	mml-mir-3154	CM002986.2	+	10636900	10637008	ggccggcccccuccucaggccccuccuucucagccccagcucccgcucaccccugccacgucaaaggaggcagaaggggaguugggagcagagaggggaccacgggcug	109	mml-mir-3154-5p	NA	NA	NA	mml-mir-3154-3p	10636970	10636988	cagaaggggaguugggagc
yes	yes	yes	ENSMMUT00000077712	mml-mir-3167	CM002988.2	-	119813225	119813283	caguauuucugaaauucuauuuucugaaguucuucaggaaggauuucagaaauacuggu	59	mml-mir-3167-5p	119813225	119813248	caguauuucugaaauucuauuuuc	mml-mir-3167-3p	119813263	119813283	aaggauuucagaaauacuggu
yes	yes	yes	ENSMMUT00000078455	mml-mir-3173	CM002991.3	-	157406390	157406501	auagaauuuguuggucuugggccagcuucccugcccugccuguuuucuucuuugugguuuuaugaaagcgaaggaggaaacaggcaggccagggaagcgcucucuaccuccc	112	mml-mir-3173-5p	NA	NA	NA	mml-mir-3173-3p	157406459	157406481	gaaggaggaaacaggcaggccag
yes		yes	ENSMMUT00000059774	mml-miR-3174	CM002991.3	+	68054362	68054514	cauaugugguccauggaccagcaucagcauuaccugguagugaguuagaaaugcagagccccgggcuucucagcaaaccuacuggaucugcauuuuaauucacaugcaugguaaugucuguaaagcacugauggacuggaaaguacugaaaug	153	mml-miR-3174-5p	68054399	68054422	uagugaguuagaaaugcagagccc	mml-miR-3174-3p	68054449	68054471	cugcauuuuaauucacaugcaug
yes				mml-miR-3199a	CM002992.3	-	69709515	69709653	acuagcacuauucacacacaagagaaacucggugacucccuggaacugccuuaggagaaaguuucuggaaguuuugacauuccagaaaccuucuccuaaggcagucccugggagucacugagucacuucauuuccauua	139	mml-miR-3199a-5p	69709545	69709566	ggugacucccuggaacugccuu	mml-miR-3199a-3p	69709614	69709635	ggcagucccugggagucacuga
yes				mml-miR-3199b	CM002992.3	+	69709515	69709647	uaauggaaaugaagugacucagugacucccagggacugccuuaggagaagguuucuggaaugucaaaacuuccagaaacuuucuccuaaggcaguuccagggagucaccgaguuucucuugugugugaauagu	133	mml-miR-3199b-5p	69709545	69709566	agggacugccuuaggagaaggu	mml-miR-3199b-3p	69709594	69709615	uuucuccuaaggcaguuccagg
yes	yes	yes	ENSMMUT00000068454	mml-mir-3200	CM002992.3	+	72589387	72589496	agagagacaaagaaggagguggucgagggaaucugagaaggcgcacaagguuuguguccaauacaguccacaccuugcgcuacucaggucugcucgugcccucccaugau	110	mml-mir-3200-5p	72589415	72589442	gaaucugagaaggcgcacaagguuugug	mml-mir-3200-3p	72589457	72589478	caccuugcgcuacucaggucug
yes		yes	ENSMMUT00000071813	mml-miR-3202	CM002997.3	+	147458072	147458223	cucccugaacccgccugccugcccacccucuugagugccaaauuuauuaauauggaagggagaagagcuuuaaugauuggagucauuuucagagcauuaaagcuguucucccuuccauauuaauguguuucucagcuacuaggcucacucac	152	mml-miR-3202-5p	147458127	147458147	aagggagaagagcuuuaauga	mml-miR-3202-3p	147458168	147458187	uuaaagcuguucucccuucc
yes				mml-miR-3544	CM002991.3	-	163207947	163208099	ggugcagaggaggguccgggggcugcgcgugguugaaggggaugaagaaaggcaucauauaggagcuggauaacugugcaucaacuccuguaugaagccguucccaccccccaacuacugacuacgggccgcaacccuccucccggaagcgca	153	mml-miR-3544-5p	163207992	163208014	agaaaggcaucauauaggagcug	mml-miR-3544-3p	163208030	163208051	acuccuguaugaagccguuccc
yes				mml-miR-3546	CM002991.3	+	84741007	84741156	cccucgccccccacacaggcugaucgacgguagcuccucugaccaacaagcuuuuugcucgucuuauacgugagcaucagguauaacccgggccaaaagcucgccugucacaggaagcgggucagggccagccagaguucacagaguaua	150	mml-miR-3546-5p	84741054	84741075	aagcuuuuugcucgucuuauac	mml-miR-3546-3p	84741089	84741108	auaacccgggccaaaagcuc
yes				mml-miR-3553	CM002984.2	+	155860302	155860454	agaaguagguaaggugcuccagaggcccucguggaucugucucugcucuguuuauggcccuucgguaauucacugaccgagacuguucacagugaauucuaccagugccauacacagaacaggagucacguucugcggccugccgacccugug	153	mml-miR-3553-5p	155860353	155860376	uuauggcccuucgguaauucacug	mml-miR-3553-3p	155860391	155860413	cagugaauucuaccagugccaua
yes				mml-miR-3557	CM002982.3	-	147861331	147861532	aaugaggcucggagaguucaaauggcuugcuccggggucacccagccagagaguggggaaggugacuccacucaggccuucugacuccaaguccagugcuauuucgagguaacacacaggaccuggagucaggagcccuggguggcucugucacccucuggcugcauggucccauacaagccgcucaccccucgcagccucu	202	mml-miR-3557-5p	147861397	147861417	uccacucaggccuucugacuc	mml-miR-3557-3p	147861458	147861481	gucaggagcccuggguggcucugu
yes	yes			mml-mir-3577	CM002988.2	+	7527537	7527596	uguggcagcccugagagccagguggaguuguccuuucaucugucccucuuggcugccagc	60	mml-mir-3577-5p	7527537	7527560	uguggcagcccugagagccaggug	mml-mir-3577-3p	7527575	7527596	ucugucccucuuggcugccagc
yes		yes	ENSMMUT00000066678	mml-miR-3614	CM002994.2	+	32780152	32780254	auagcuacuguagguucugucuugggucacuuggaucugaaggcugccccuuugcucucugggguagccuucagaucuugguguuuugauuacucacuauaga	103	mml-miR-3614-5p	32780178	32780199	ucacuuggaucugaaggcugcc	mml-miR-3614-3p	32780216	32780240	uagccuucagaucuugguguuuuga
yes		yes	ENSMMUT00000055256	mml-miR-3652	CM002989.3	+	103789348	103789495	gugggcggaccgcgcggcuggaggugugaggauccgagcuuagggguggggguggaggcggcuccugcgaucgagagggacuugagacucaccggccgcacgccaugagggcccugugggugcugggccucugcugcguccugcugac	148	mml-miR-3652-5p	103789362	103789380	cggcuggaggugugaggau	mml-miR-3652-3p	103789465	103789485	gggugcugggccucugcugcg
yes		yes	ENSMMUT00000075610	mml-miR-3659	CM002977.3	+	37297091	37297190	ucucuacaagcagauacaaggaugcccuuguacacgacacacgugcugcuuguauagacacgaguguugucuacgagggcacccuugugucugugugugu	100	mml-miR-3659-5p	37297116	37297135	ccuuguacacgacacacgug	mml-miR-3659-3p	37297151	37297170	cgaguguugucuacgagggc
yes		yes	ENSMMUT00000074351	mml-miR-3661	CM002982.3	+	131914944	131915046	gggcuuggccccgcggcagcuguccgcagccguaguacagcucaccuucucgcagaggcucuugaccugggacucggacagcugcuugcacucguucagcugc	103	mml-miR-3661-5p	131914963	131914988	cuguccgcagccguaguacagcucac	mml-miR-3661-3p	131915006	131915026	ugaccugggacucggacagcu
yes				mml-miR-3662	CM002983.2	+	132370030	132370133	gaaauguguuuuccucaacgcucacaguuacacuucuuacucucaauccauucauauugaaaaugaugaguagugacugaugaagcacaaaucagccaaacucu	104	mml-miR-3662-5p	NA	NA	NA	mml-miR-3662-3p	NA	NA	NA
yes				mml-miR-3674	JSUE03172842.1	+	179	278	ugcaacuuuaauuacuccugcagaugacaucacuauuguagaaccuaagauuggucuuuugagaugucuuuucagguuuuugcauuucugaugacugcau	100	mml-miR-3674-5p	208	230	ucacuauuguagaaccuaagauu	mml-miR-3674-3p	246	271	cuuuucagguuuuugcauuucugaug
yes		yes	ENSMMUT00000060733	mml-miR-3909	CM002992.3	+	77248704	77248855	gucaccagccuggcugagguuugcuguugcaccaucauuccucuggggagcaggcccugggagacagggaaaagcacaccaggagcuuguccucuagggccugcagucucacaggagugugacgugcaccgagaccaccgcugugaaggcaa	152	mml-miR-3909-5p	77248751	77248771	gagcaggcccugggagacagg	mml-miR-3909-3p	77248791	77248812	uguccucuagggccugcagucu
yes		yes	ENSMMUT00000064019	mml-miR-3913a	CM002989.3	-	68344950	68345051	uuguuuauaauaaacugaaauauuugggacugaucuugacacucuuacauguuuuggcagacaucaagaucagucccaaauauuucaguuuauuauagacag	102	mml-miR-3913a-5p	68344972	68344993	uuugggacugaucuugacacuc	mml-miR-3913a-3p	68345010	68345031	acaucaagaucagucccaaaua
yes				mml-miR-3913b	CM002989.3	+	68344950	68345051	cugucuauaauaaacugaaauauuugggacugaucuugaugucugccaaaacauguaagagugucaagaucagucccaaauauuucaguuuauuauaaacaa	102	mml-miR-3913b-5p	68344963	68344984	acugaaauauuugggacugauc	mml-miR-3913b-3p	68345019	68345040	ucagucccaaauauuucaguuu
yes	yes			mml-mir-3927	CM002986.2	-	30038009	30038119	ggcccuaggacuugguuuugccagugugccaaugccuaucaaauaucuaccugucauguuugucauaggacagguagauauuugauaggcauuggcacguuggggucggcc	111	mml-mir-3927-5p	NA	NA	NA	mml-mir-3927-3p	30038079	30038099	cagguagauauuugauaggca
		yes	ENSMMUT00000069654	mml-mir-3927-1	CM002986.2	+	30038023	30038093	ugccaaugccuaucaaauaucuaccuguccuaugacaaacaugacagguagauauuugauaggcauuggca	71	mml-mir-3927-1-5p	30038033	30038053	uaucaaauaucuaccuguccu	mml-mir-3927-1-3p	30038067	30038087	cagguagauauuugauaggca
yes	yes			mml-mir-3938	CM002980.3	+	86330449	86330504	agauuaucuacaagggaauuuuuuuaauuuuuaaaauucccuuauggauaaucugg	56	mml-mir-3938-5p	86330449	86330470	agauuaucuacaagggaauuuu	mml-mir-3938-3p	86330483	86330504	aauucccuuauggauaaucugg
yes	yes	yes	ENSMMUT00000062239	mml-mir-4446	CM002980.3	+	34627123	34627232	uacuucaggauugaugaguccgguggcucugguccauuucccugccauucccuuggcuucaauuuacucccagggcuggcagugagaugggucaaggcucacaccuucac	110	mml-mir-4446-5p	34627156	34627179	ccauuucccugccauucccuuggc	mml-mir-4446-3p	34627193	34627213	cagggcuggcagugagauggg
yes				mml-miR-4459	CM002982.3	+	100579444	100579574	cgcccacccccgccaacuuguucuggccucuuagcgccuuucuccagcccgcggcccgcccuuccuccgggugucuuagagcggggcgcaggaggcgggcucagcgcugacgggcugcgccucugcagcca	131	mml-miR-4459-5p	100579458	100579480	aacuuguucuggccucuuagcgc	mml-miR-4459-3p	100579611	100579633	ggaggaggaggcggaggaggugg
yes				mml-miR-4504	JSUE03155942.1	+	576	727	cauuuaucuuucugugcuugguuuauuucaccuaagauaauguccuccagguucaucucuguugucauuuguggcauggaccauuugugacaauagagaugaacauggaggauauuaucuuaaguauuucucauuaucuuaaagauuuucuc	152	mml-miR-4504-5p	624	647	agguucaucucuguugucauuugu	mml-miR-4504-3p	661	683	ugugacaauagagaugaacaugg
	yes			mml-mir-4536	CM002997.3	+	55014849	55014959	acugcccugcuuucauacauacauacuuacauacauguaagugugguagauauaugcacuguauauaaaaaugugguagauauaugcacgauauauguauguauguaugua	111	mml-mir-4536-5p	NA	NA	NA	mml-mir-4536-3p	55014920	55014939	ugugguagauauaugcacga
yes		yes	ENSMMUT00000068762	mml-miR-4646	CM002983.2	-	32569207	32569307	gggguggagguuggggcugaacugggaagaggagcugaggaacacugcggagagggucucacauugucccucucccuucccagguuacuugaguuugucca	101	mml-miR-4646-5p	32569231	32569256	ggaagaggagcugaggaacacugcgg	mml-miR-4646-3p	32569269	32569289	auugucccucucccuucccag
	yes			mml-mir-4650	CM002984.2	-	49150460	49150569	uuuuccugcagauauugucaggccucauucuaccuuccaagucucaaagccuuggaagguagaaugauuggaagguagaaugaggccugauaaucucuacagaaaggcaa	110	mml-mir-4650-5p	NA	NA	NA	mml-mir-4650-3p	49150528	49150550	uggaagguagaaugaggccugau
yes		yes	ENSMMUT00000073266	mml-miR-4657	CM002984.2	+	63900730	63900832	gcuacuaagcuauaauuagcugaauagaaagaauguggaaguggucugaggcauauagaguauaugccaagaacacuaccauauauggcaucagcuuugguua	103	mml-miR-4657-5p	63900764	63900782	guggaaguggucugaggca	mml-miR-4657-3p	63900796	63900813	ccaagaacacuaccauau
yes				mml-miR-4659a	CM002985.3	-	6912426	6912577	caaugauggagauaggguagauggaaucaagagcuuagaaacuguugacgcugccaugucuaagaagaaaauuuuucuccaaaguuuucuucuuagacauggcagcuucagcaguuucuuccaaagaaaucaagucaagagaguccacauua	152	mml-miR-4659a-5p	6912477	6912497	ugccaugucuaagaagaaaau	mml-miR-4659a-3p	6912511	6912531	uuucuucuuagacauggcagc
yes		yes	ENSMMUT00000053365	mml-miR-4659b	CM002985.3	+	6912432	6912582	ggacucucuugacuugauuucuuuggaagaaacugcugaagcugccaugucuaagaagaaaacuuuggagaaaaauuuucuucuuagacauggcagcgucaacaguuucuaagcucuugauuccaucuacccuaucuccaucauugcguca	151	mml-miR-4659b-5p	6912474	6912495	ugccaugucuaagaagaaaacu	mml-miR-4659b-3p	6912508	6912528	uuucuucuuagacauggcagc
yes	yes	yes	ENSMMUT00000077670	mml-mir-4667	CM002986.2	-	48650817	48650928	cccuagagguugagguucugacuggggagcagaaggagaacccaagaaaagcugacuuggaggucccuccuucuguccccacaggacuuuggccuggaugugccugccuucc	112	mml-mir-4667-5p	48650837	48650857	acuggggagcagaaggagaac	mml-mir-4667-3p	NA	NA	NA
yes		yes	ENSMMUT00000055614	mml-miR-4671	CM002977.3	+	210583775	210583875	cgggccaauauuaugcuguuuuaagaccgaagacugugcacuaaucucuuagcacugaagauuagugcauagucuuuggucucaaaauaucacgaggcuca	101	mml-miR-4671-5p	210583800	210583821	accgaagacugugcacuaaucu	mml-miR-4671-3p	210583836	210583856	uuagugcauagucuuuggucu
yes		yes	ENSMMUT00000061648	mml-miR-4676	CM002987.3	-	59609370	59609470	gaauaguucuuuguauccagagccugaacaaaagagccaguggugagacagugaguugauuacuucucacuguuucaccacuggcucuuugguucagguua	101	mml-miR-4676-5p	59609402	59609423	agagccaguggugagacaguga	mml-miR-4676-3p	59609437	59609458	cacuguuucaccacuggcucuu
yes	yes	yes	ENSMMUT00000060225	mml-mir-4677	CM002977.3	+	219769840	219769898	uuguucuuuggucuuucagccaugaccugaccuucugucugugagaccaaagaacuacu	59	mml-mir-4677-5p	219769840	219769861	uuguucuuuggucuuucagcca	mml-mir-4677-3p	219769877	219769898	ucugugagaccaaagaacuacu
yes		yes	ENSMMUT00000071960	mml-miR-4680	CM002987.3	+	106838820	106838915	gucgucuuaaaccagagagcuacugaauauaagaacucuugcagucuuagauguuuuaaaaauauauaucugaauuguaagaguuguuagcacaag	96	mml-miR-4680-5p	106838851	106838872	agaacucuugcagucuuagaug	mml-miR-4680-3p	106838888	106838908	ucugaauuguaagaguuguua
yes		yes	ENSMMUT00000070143	mml-miR-4694	CM002988.2	+	46573663	46573814	acuuaacugggaauauuuuucuuuuucaaauacauagguguuauccuauccauuugccucuuucggaaaauggaggcaaacggacaggauaacaccucuguauuuggaaauuuacacacaaaaaaaaucagcuuugaaggaugcuauggagg	152	mml-miR-4694-5p	46573698	46573719	agguguuauccuauccauuugc	mml-miR-4694-3p	46573739	46573759	caaacggacaggauaacaccu
yes	yes	yes	ENSMMUT00000064742	mml-mir-4703	CM002990.2	+	30912869	30912929	uggcaauacaguacaaauacaguguguuugauuugcacuguaguuguacuguauugccacu	61	mml-mir-4703-5p	30912869	30912890	uggcaauacaguacaaauacag	mml-mir-4703-3p	30912908	30912929	guaguuguacuguauugccacu
yes		yes	ENSMMUT00000059985	mml-miR-4707	CM002991.3	-	84290471	84290572	gggcccgaacaagagguuccggagccccggugcgggcggauucugggguguagacgcugcugaccagcccgccccagccgagguucucggcaccgccuugag	102	mml-miR-4707-5p	84290494	84290516	gccccggugcgggcggauucugg	mml-miR-4707-3p	84290536	84290557	agcccgccccagccgagguucu
yes		yes	ENSMMUT00000063648	mml-miR-4709	CM002991.3	-	136866268	136866367	ccuccagcucugcugcuucaacagcagugacuugcucuccaaugguauccagugauucguugaagaggaggugcucuguggcagaaacucagcuccgggu	100	mml-miR-4709-5p	136866283	136866309	cuucaacagcagugacuugcucuccaa	mml-miR-4709-3p	136866329	136866350	gaagaggaggugcucuguggca
	yes	yes	ENSMMUT00000076887	mml-mir-4716	CM002991.3	-	25475969	25476080	auuucuguauguauaugcauacuuugucuccauguguccuucccucuucuguauacauguauacaggaggaagggggaaggacacauggagacaaagugugaagguacaaua	112	mml-mir-4716-5p	NA	NA	NA	mml-mir-4716-3p	25476039	25476060	aagggggaaggacacauggaga
yes		yes	ENSMMUT00000067541	mml-miR-4721	CM002993.2	+	27353425	27353576	ugguucgaggcuugaagcgggaggacuugcggcggggccuggucauggucaagccggguuccaucaagccccaccagaagguggaggcccaggugagggcuccaggugacggugggcagggcugagccaagcuguccccagcauuccagcug	152	mml-miR-4721-5p	27353442	27353465	cgggaggacuugcggcggggccug	mml-miR-4721-3p	27353544	27353568	ggcugagccaagcuguccccagcau
yes		yes	ENSMMUT00000073022	mml-miR-4724	CM002994.2	+	25626515	25626665	cugcccugguguucaguuggaagucacgcaaaaugaacugaaccaggagugagcuuuguauacauuaucugcuagaaaaugaagugccuccugguucagcaagucccugugcggugagaggcuuuaagaaaguucuaguaaaaauguuuuu	151	mml-miR-4724-5p	25626550	25626571	aacugaaccaggagugagcuuu	mml-miR-4724-3p	25626598	25626624	gugccuccugguucagcaagucccugu
yes		yes	ENSMMUT00000067968	mml-miR-4738	CM002994.2	-	69497716	69497817	caguccggucgcguuuauccuucuuaccagcgcguuuucaguuucaaagggaagccucuccaugaaacuggagcgccuggaggagaagggggcccagagcua	102	mml-miR-4738-5p	69497744	69497765	agcgcguuuucaguuucaaagg	mml-miR-4738-3p	69497776	69497796	caugaaacuggagcgccugga
yes	yes	yes	ENSMMUT00000073634	mml-mir-4743	CM002995.2	+	37648498	37648609	gacuguuccuccucuccugcuggccggaugggacaggaggcaugaaugagccaucuuuccaaugcccuucugucuuuucugguccagguguggcaaagggaagcuggaagau	112	mml-mir-4743-5p	37648518	37648539	uggccggaugggacaggaggca	mml-mir-4743-3p	NA	NA	NA
yes		yes	ENSMMUT00000054601	mml-miR-4757	CM002978.2	+	19267938	19268036	uucaagcuuuaugcugcagcccgaggccucugugacgucacagugucugcaggaggagaccaugacgucacagaggcuuagcgcucugagaggugggac	99	mml-miR-4757-5p	19267961	19267983	aggccucugugacgucacagugu	mml-miR-4757-3p	19267997	19268019	ccaugacgucacagaggcuuagc
yes		yes	ENSMMUT00000074883	mml-miR-4762	CM002992.3	+	87903458	87903556	agucauaucccauuauuucugauaccccaaaucuugauccgaagccuugaucagaagcuacuaaggcuucugaucaagauuugugcugucaagaauaac	99	mml-miR-4762-5p	87903484	87903503	ccaaaucuugauccgaagcc	mml-miR-4762-3p	87903524	87903544	cuucugaucaagauuugugcu
yes	yes	yes	ENSMMUT00000062656	mml-mir-4766	CM002992.3	-	82839353	82839408	ucugaaagagcaguugguguuuauuuuuuacuaaacagcaaucgcucuuuuggaag	56	mml-mir-4766-5p	82839353	82839374	ucugaaagagcaguugguguuu	mml-mir-4766-3p	82839387	82839408	acagcaaucgcucuuuuggaag
yes		yes	ENSMMUT00000053814	mml-miR-4768	CM002997.3	+	16790246	16790397	cacuacccagagauauagacaugauggaccaaguaacuucuccaaacuuugauucucucuggaucccauggauauaggaacugugaggucuaggagauccagagagaaucagaguuucagugagugaacgcuagaguguaugcuucuaggau	152	mml-miR-4768-5p	16790297	16790317	auucucucuggaucccaugga	mml-miR-4768-3p	16790336	16790354	uaggagauccagagagaau
[truncated: 1,189 more rows]

## Sheet: TableS4
Table S4. The normalized abundances of selected conserved miRNAs with enough abundances.
[truncated: 321 more rows]

## Sheet: TableS5
Table S5. The miRNAs that are highly expressed in different tissues. Set1 to Set10 correspond to the miRNAs in the Rectangle 1 to 10 in Figure 1b.
[truncated: 178 more rows]

[truncated: 10 more sheets: TableS6, TableS7, TableS8, TableS9, TableS10, TableS11, TableS12, TableS13, TableS14, TableS15]
